# Supplementary material for: Construction of indeno[1,2-b]pyrroles via chemoselective N-acylation/cyclization/Wittig reaction sequence
Source: Royal Society of Chemistry journal article supplement (doi:10.1039/d0cc08184a), 2021-01-01

# Construction of Indeno[1,2-*b*]pyrroles via Chemoselective N-Acylation/Cyclization/Wittig Reaction Sequence

Athukuri Edukondalu,<sup>a,‡</sup> Sandip Sambhaji Vagh,<sup>a,‡</sup> Ting-Han Lin<sup>a</sup> and Wenwei Lin<sup>a,\*</sup>

a Department of Chemistry, National Taiwan Normal University, 88, Sec. 4, Tingchow Road, Taipei 11677, Taiwan, R.O.C.

‡ These authors contributed equally.

## Table of Contents

|                                                                                                                         |           |
|-------------------------------------------------------------------------------------------------------------------------|-----------|
| I. General information                                                                                                  | S2-S2     |
| II. Reaction optimization                                                                                               | S3-S6     |
| III. Control experiments                                                                                                | S7-S9     |
| IV. Experimental procedures                                                                                             |           |
| a. Typical procedure (TP-1) for the preparation of indenone-benzohydrazide derivatives <b>1</b>                         | S9-S9     |
| b. Typical procedure (TP-2) for the preparation of phosphorus zwitterion derivatives <b>3</b>                           | S9-S10    |
| c. Typical procedure (TP-3) for the preparation of indeno[1,2- <i>b</i> ]pyrrole derivatives <b>6/7</b>                 | S10-S10   |
| d. Typical procedure (TP-4) for the preparation of spiro-indene-1,2'-[1,3,4]oxadiazol derivatives <b>8</b>              | S10-S11   |
| V. Analytical data for all new compounds                                                                                | S11-S45   |
| VI. References                                                                                                          | S45-S45   |
| VII. X-ray crystallographic data for selected compounds                                                                 | S46-S54   |
| VIII. <sup>1</sup> H NMR, <sup>13</sup> C NMR, <sup>31</sup> P NMR and <sup>19</sup> F NMR spectra of all new compounds | S55-S149  |
| IX. Scanned copies of EI Mass Spectra for selected compounds <b>6/7</b>                                                 | S150-S160 |

## **I. General information**

All reactions were carried out under argon atmosphere in oven-dried glassware with magnetic stirring. Unless otherwise stated, all reagents were used as purchased from commercial suppliers without further purification. THF was continuously refluxed and freshly distilled from sodium benzophenone ketyl under argon atmosphere. Yields refer to isolated yields of compounds estimated to be >95% pure as determined by  $^1\text{H}$  NMR. Analytical thin layer chromatography (TLC) was performed on pre coated alumina-backed silica gel plates (Merck 60 F254, 0.2 mm thickness) which were developed using UV irradiation at 254 nm. Flash column chromatography was performed using silica gel (SiliCycle SiliaFlash P60, 230-400 mesh). Melting points were measured on a hostage melting point apparatus and are uncorrected. IR spectra were recorded on a Perkin Elmer 500 spectrometer and only selected peaks are mentioned.  $^1\text{H}$  NMR spectra were recorded on either an Oxford JEOL 400 MHz spectrometer or a Bruker Ascend 400 MHz spectrometer.  $^{13}\text{C}$  NMR spectra at 100 MHz,  $^{31}\text{P}$  NMR at 162 MHz and  $^{19}\text{F}$  NMR at 376 MHz. Chemical shifts are reported in  $\delta$  ppm referenced to an internal TMS standard ( $\delta = 0.0$  ppm) for  $^1\text{H}$  NMR,  $\text{CDCl}_3$  ( $\delta = 77.0$  ppm) for  $^{13}\text{C}$  NMR,  $\text{DMSO-d}_6$  ( $\delta = 2.50$  ppm for  $^1\text{H}$  NMR and  $39.52$  ppm for  $^{13}\text{C}$  NMR),  $\text{H}_3\text{PO}_4$  ( $\delta = 0.0$  ppm) for  $^{31}\text{P}$  NMR, and  $\text{C}_6\text{H}_5\text{F}$  ( $\delta = -113.15$  ppm) for  $^{19}\text{F}$  NMR. The following abbreviations (or combinations thereof) were used to explain the multiplicities: s = singlet, d = doublet, t = triplet, q = quartet, m = multiplet, dd = doublet of doublet, dt = doublet of triplet, td = triplet of doublet, tt = triplet of triplet, qd = quartet of doublet, br = broad, p = pseudo. High resolution mass spectra were recorded on Waters Xevo G2-S QToF using ESI (TOF analyzer). The X-ray diffraction measurements were carried out at 200 K on either a Bruker D8 Venture or a Bruker KAPPA APEX II CCD area detector system equipped with a graphite monochromator and a Mo-K $\alpha$  fine-focus sealed tube ( $k = 0.71073 \text{ \AA}$ ).

## II. Reaction optimization for 6aa:

### a) Optimization of reaction conditions for the synthesis of zwitterion 3/4<sup>a</sup>

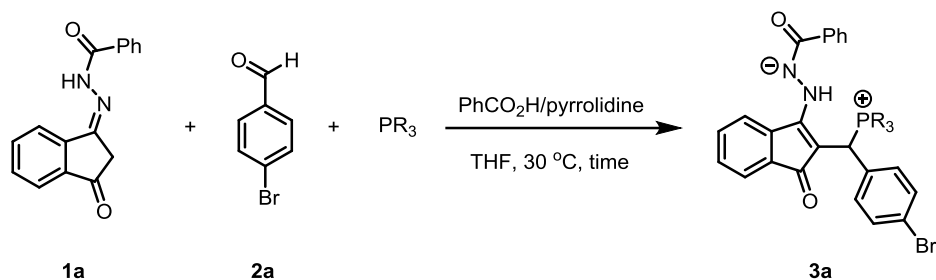

| entry | phosphine               | $t$ (h) | <b>3/4<sup>b</sup></b> |
|-------|-------------------------|---------|------------------------|
| 1     | $\text{PBu}_3$          | 5       | 90                     |
| 2     | $\text{PPh}_3$          | 16      | nr                     |
| 3     | $\text{PPh}_2\text{Et}$ | 12      | trace                  |
| 4     | $\text{PEt}_2\text{Ph}$ | 12      | trace                  |
| 5     | $\text{PPh}_2\text{Me}$ | 6       | 75                     |

<sup>a</sup> The reactions were carried out with compound **1a** (0.3 mmol), 4-BrPhCHO (**2a**) (1.1 equiv),  $\text{PhCO}_2\text{H}$  (0.1 equiv),  $\text{PR}_3$  (1.2 equiv) and pyrrolidine (0.1 equiv) in anhydrous THF (3 mL) under argon at 30 °C. <sup>b</sup> Yield of the zwitterion **3a/4a** was determined by NMR analysis of the crude reaction mixture using 1,3,5-trimethoxybenzene as an internal standard. nr = no reaction.

It is noteworthy that the phosphorus zwitterions **3** are very stable and easily isolable and confirmed by the NMR, HRMS and X-ray analysis, further utilized for the desired indeno[1,2-*b*]pyrrole derivatives **6/7**. Unfortunately, the phosphorus zwitterions **4** were not able to isolate in pure form but crude reaction mixture was used for the one step reaction of spiro-indene-1,2'-[1,3,4]oxadiazol derivatives **8**. The phosphorus zwitterion **4a** from the crude reaction mixture was confirmed by the <sup>31</sup>P NMR and HRMS analysis.

<sup>31</sup>P NMR Spectrum of **4a** from the crude reaction mixture (CDCl<sub>3</sub>, 162 MHz)

Current Data Parameters  
NAME SW 967-1  
EXPNO 2  
PROCNO 1

F2 - Acquisition Parameters  
Date\_ 20200917  
Time\_ 11.58  
INSTRUM spect  
PROBHD 5 mm PABEO BB/  
PULPROG zgpg30  
TD 65536  
SOLVENT CDCl3  
NS 32  
DS 4  
SWH 49019.609 Hz  
FIDRES 0.747380 Hz  
AQ 0.6684672 sec  
RG 198.09  
DM 10.200 usec  
DE 6.50 usec  
TE 298.6 K  
D1 2.0000000 sec  
D11 0.0300000 sec  
TD0 1

==== CHANNEL f1 =====  
SFO1 161.9836917 MHz  
NUC1 31P  
P1 15.00 usec  
PLW1 13.1999981 W

==== CHANNEL f2 =====  
SFO2 400.1316005 MHz  
NUC2 1H  
CFPRG [2] waltz16  
PCPD2 90.00 usec  
PLW2 12.5000000 W  
PLW12 0.34722000 W  
PLW13 0.28125000 W

F2 - Processing parameters  
SI 32768  
SF 161.9755037 MHz  
WDW EM  
SSB 0  
LB 2.00 Hz  
GB 0  
PC 1.40

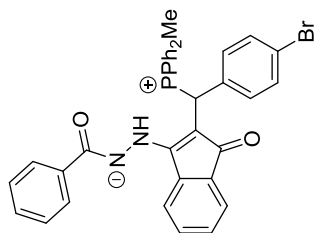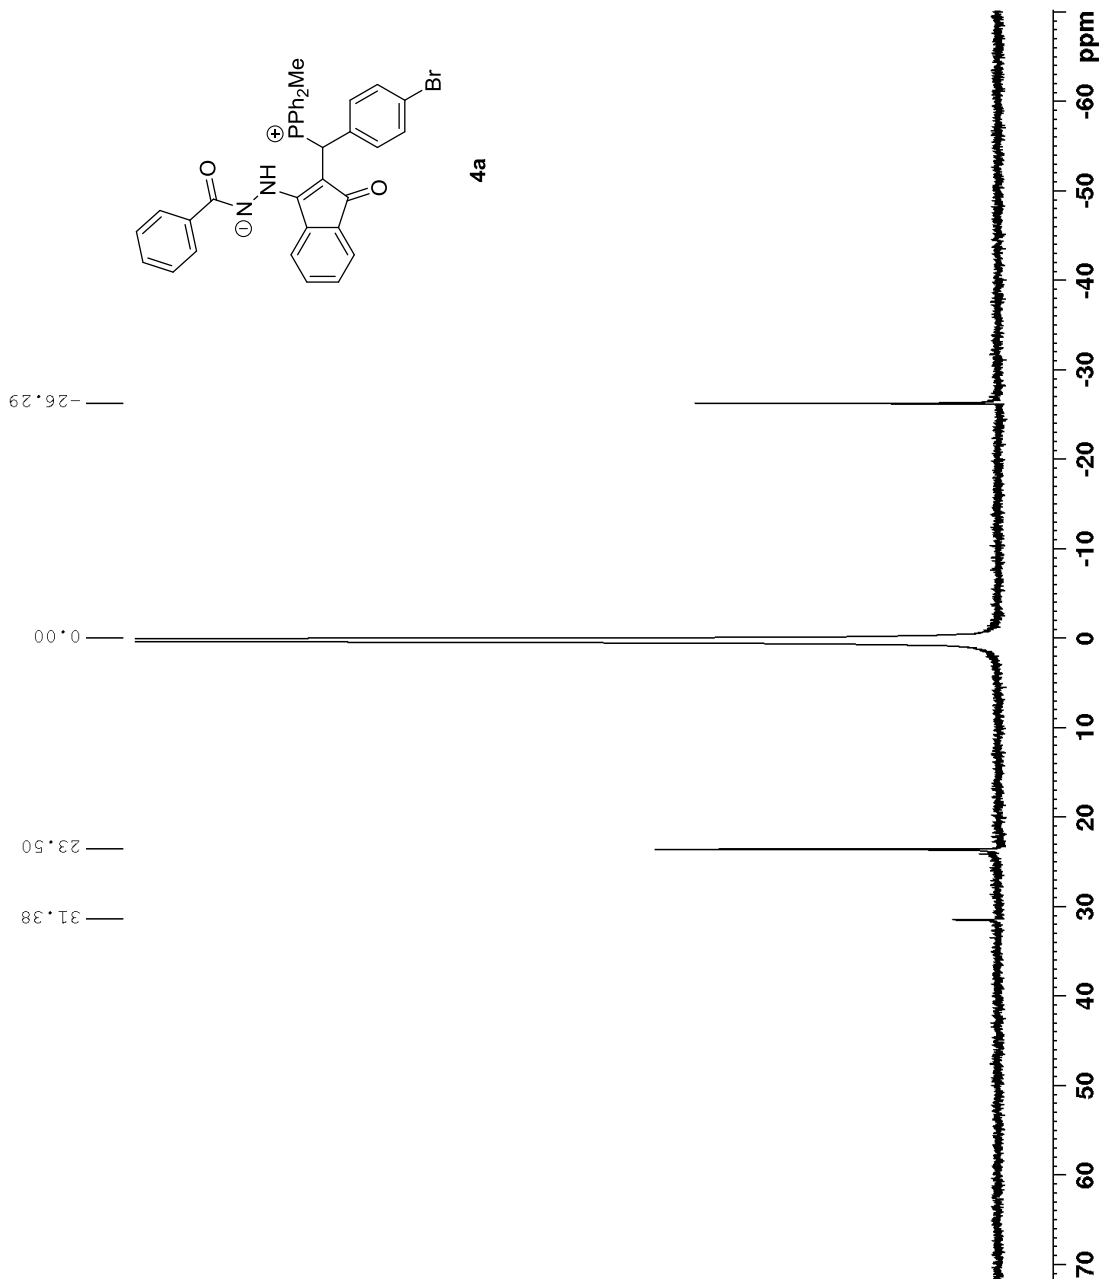

# ESI-HRMS Spectrum of 4a from the crude reaction mixture

## Elemental Composition Report

### Single Mass Analysis

Tolerance = 200.0 PPM / DBE: min = -10.0, max = 100.0

Element prediction: Off

Number of isotope peaks used for i-FIT = 3

Monoisotopic Mass, Even Electron Ions

17227 formula(e) evaluated with 2311 results within limits (up to 20 closest results for each mass)

Elements Used:

C: 1-80 H: 1-100 N: 1-10 O: 1-10 Na: 0-1 Br: 1-5 P: 1-5

SW-768  
2006239st11 30 (0.314) Cm (30.31)

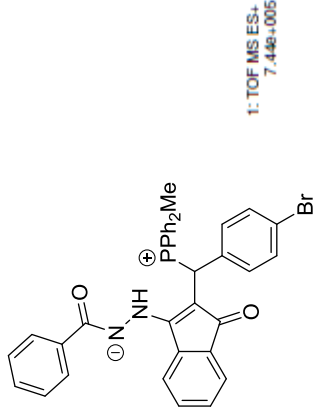

1: TOF MS ES+  
7.446+005

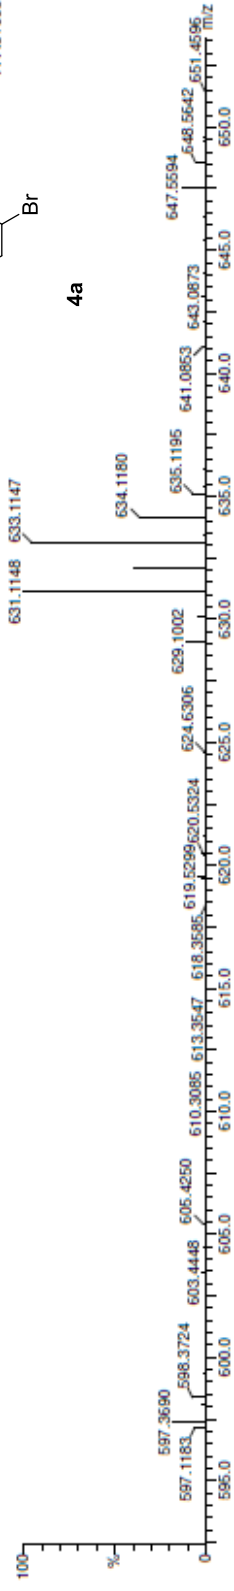

Minimum:  
Maximum:

| Mass     | Calc. Mass | mDa  | PPM  | DBE  | Formula                 |
|----------|------------|------|------|------|-------------------------|
| 631.1148 | 631.1150   | -0.2 | -0.3 | 23.5 | C36 H29 N2 O2 Br P      |
|          | 631.1140   | 0.8  | 1.3  | 19.5 | C30 H30 N6 O Br P2      |
|          | 631.1156   | -0.8 | -1.3 | 14.5 | C28 H35 N4 O2 Br P3     |
|          | 631.1149   | -0.1 | -0.2 | 6.5  | C24 H41 N2 O3 Na Br P4  |
|          | 631.1158   | -1.0 | -1.6 | 12.5 | C23 H30 N8 O5 Na Br P   |
|          | 631.1147   | 0.1  | 0.2  | 3.5  | C23 H42 N2 O6 Br2 P     |
|          | 631.1146   | 0.2  | 0.3  | 10.5 | C22 H36 N8 O Br P4      |
|          | 631.1144   | 0.4  | 0.6  | 7.5  | C22 H34 N4 O9 Na Br P   |
|          | 631.1153   | -0.5 | -0.8 | 0.5  | C20 H44 N4 O3 Na Br2 P2 |
|          | 631.1142   | 0.6  | 1.0  | 11.5 | C20 H29 N10 O7 Br P     |
|          | 631.1149   | -0.1 | -0.2 | 0.5  | C19 H45 N2 O6 Br P5     |
|          | 631.1150   | -0.2 | -0.3 | 4.5  | C18 H39 N10 O Br2 P2    |
|          | 631.1158   | -1.0 | -1.6 | 6.5  | C18 H34 N8 O8 Br P2     |
|          | 631.1153   | -0.5 | -0.8 | -5.5 | C15 H48 N4 O6 Br2 P3    |
|          | 631.1143   | 0.5  | 0.8  | -3.5 | C14 H45 N8 O2 Na Br2 P3 |
|          | 631.1151   | -0.3 | -0.5 | -1.5 | C14 H40 N6 O9 Na Br P3  |
|          | 631.1147   | 0.1  | 0.2  | -9.5 | C10 H48 N10 O2 Na Br3 P |
|          | 631.1155   | -0.7 | -1.1 | -7.5 | C10 H43 N8 O9 Na Br2 P  |
|          | 631.1143   | 0.5  | 0.8  | -9.5 | C9 H49 N8 O5 Br2 P4     |
|          | 631.1140   | 0.8  | 1.3  | -5.5 | C8 H41 N10 O8 Na Br P4  |

**b) Optimization of reaction conditions for the synthesis of compound 6<sup>a</sup>**

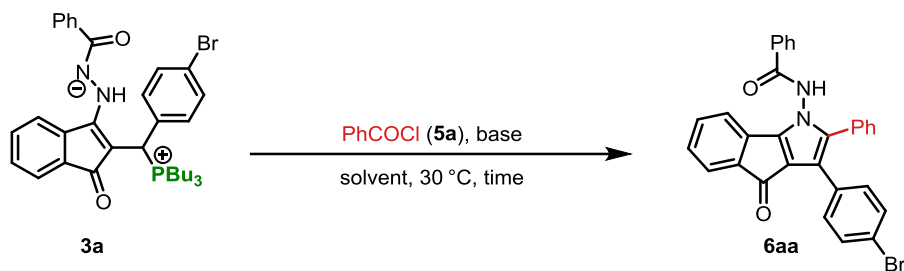

| entry             | base              | solvent                         | <i>t</i> (h) | <b>6aa<sup>b</sup></b> |
|-------------------|-------------------|---------------------------------|--------------|------------------------|
| 1                 | Et <sub>3</sub> N | THF                             | 12           | 85                     |
| 2                 | DIPEA             | THF                             | 18           | 60                     |
| 3                 | DBU               | THF                             | 10           | 75                     |
| 4                 | TMG               | THF                             | 10           | 51                     |
| 5                 | TBD               | THF                             | 12           | 84                     |
| 6                 | MTBD              | THF                             | 12           | 85                     |
| 7                 | Et <sub>3</sub> N | CH <sub>2</sub> Cl <sub>2</sub> | 24           | 25                     |
| 8                 | Et <sub>3</sub> N | CH <sub>3</sub> CN              | 24           | 50                     |
| 9                 | Et <sub>3</sub> N | toluene                         | 48           | 47                     |
| 10                | Et <sub>3</sub> N | Et <sub>2</sub> O               | 24           | 65                     |
| 11 <sup>c</sup>   | Et <sub>3</sub> N | THF                             | 4            | 85                     |
| 12 <sup>d</sup>   | Et <sub>3</sub> N | THF                             | 4            | 90                     |
| 13 <sup>d,e</sup> | Et <sub>3</sub> N | THF                             | 4            | 76                     |

<sup>a</sup> The reactions were carried out with compound **3a** (0.1 mmol), PhCOCl (**5a**) (1.1 equiv) and base (1.5 equiv) in dry solvent (1 mL.) under argon at 30 °C. <sup>b</sup> Yield of the product **6aa** was determined by NMR analysis of the crude reaction mixture using 1,3,5-trimethoxybenzene as an internal standard. <sup>c</sup> at 40 °C. <sup>d</sup> at 50 °C. <sup>e</sup> Addition sequence: compound **3a** (0.1 mmol), Et<sub>3</sub>N (1.5 equiv) and PhCOCl (**5a**) (1.1 equiv) in dry solvent (1 mL.) under argon at 50 °C.

### III. Control experiments:

#### Scheme S1.

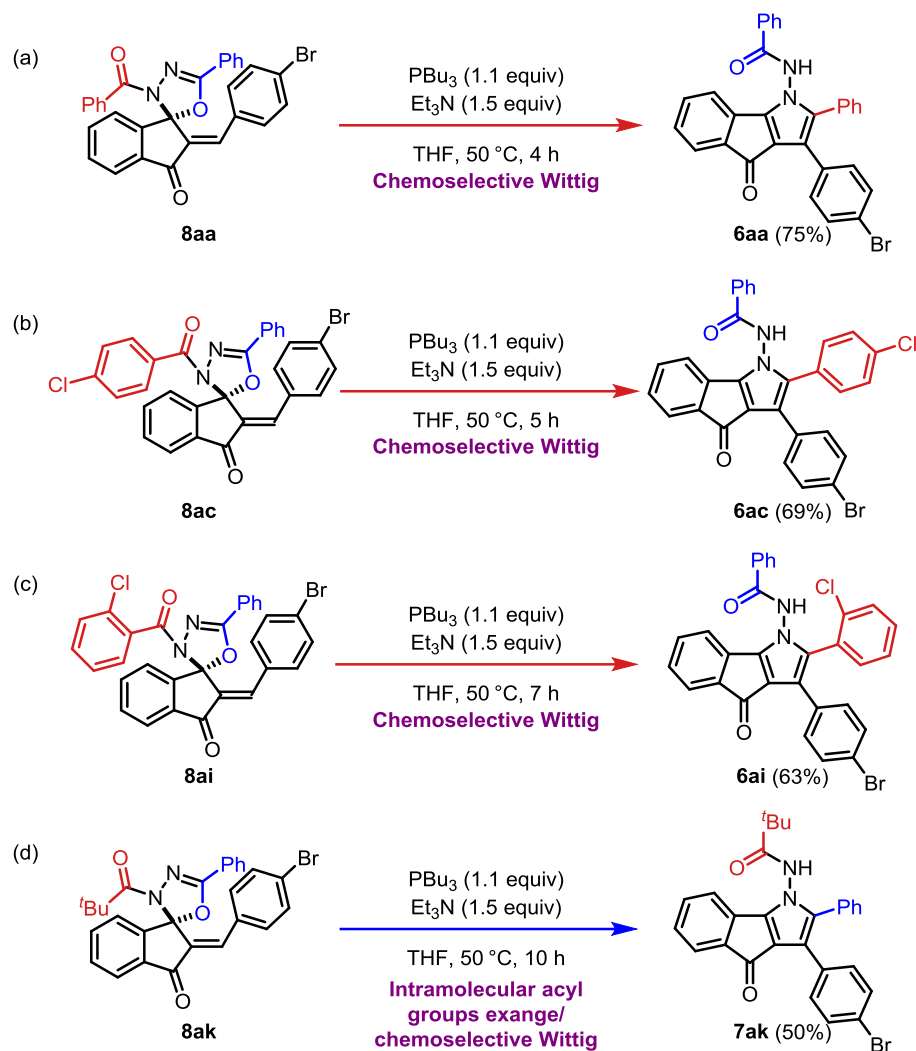

To investigate the mechanism, we have performed control experiments by using different spiro-indene-1,2'-[1,3,4]oxadiazol derivatives,  $\text{PBU}_3$  and  $\text{Et}_3\text{N}$  at  $50\text{ }^\circ\text{C}$ . First, we examined the reaction between **8aa**,  $\text{PBU}_3$  (1.1 equiv) in the presence of  $\text{Et}_3\text{N}$  (1.5 equiv) in THF at  $50\text{ }^\circ\text{C}$ . Interestingly, we have observed the **6aa** in 75% yield within 4 h (Scheme S1a). It could be understood that the spiro-indene-1,2'-[1,3,4]oxadiazol derivative is the key intermediate for the formation of indeno[1,2-*b*]pyrrole in our protocol. Similarly, we have carried out the reactions of *para*- and *ortho*-chloro substituted spiro-indene-1,2'-[1,3,4]oxadiazol derivatives such as **8ac** and **8ai** and  $\text{PBU}_3$  (1.1 equiv) in the presence of  $\text{Et}_3\text{N}$  (1.5 equiv) in THF at  $50\text{ }^\circ\text{C}$  to afford the desired indeno[1,2-*b*]pyrrole derivatives **6ac** and **6ai** in 69% and 63% yields, respectively (Scheme 1b,

and 1c). We have further confirmed the products **6ac** and **6ai** by using EI mass analysis.

Accordingly, pivaloyl group substituted compound **8ak** was also reacted with  $\text{PBu}_3$  (1.1 equiv) in the presence of  $\text{Et}_3\text{N}$  (1.5 equiv) in THF at  $50^\circ\text{C}$ , and the rearranged indeno[1,2-*b*]pyrrole **7ak** was obtained in 50 % yield instead of **6ak** in 10 h (Scheme 1d). Further, X-ray and EI mass analysis unambiguously confirmed that the product is rearranged indeno[1,2-*b*]pyrrole **7ak**.

### Scheme S2. Plausible Mechanism.

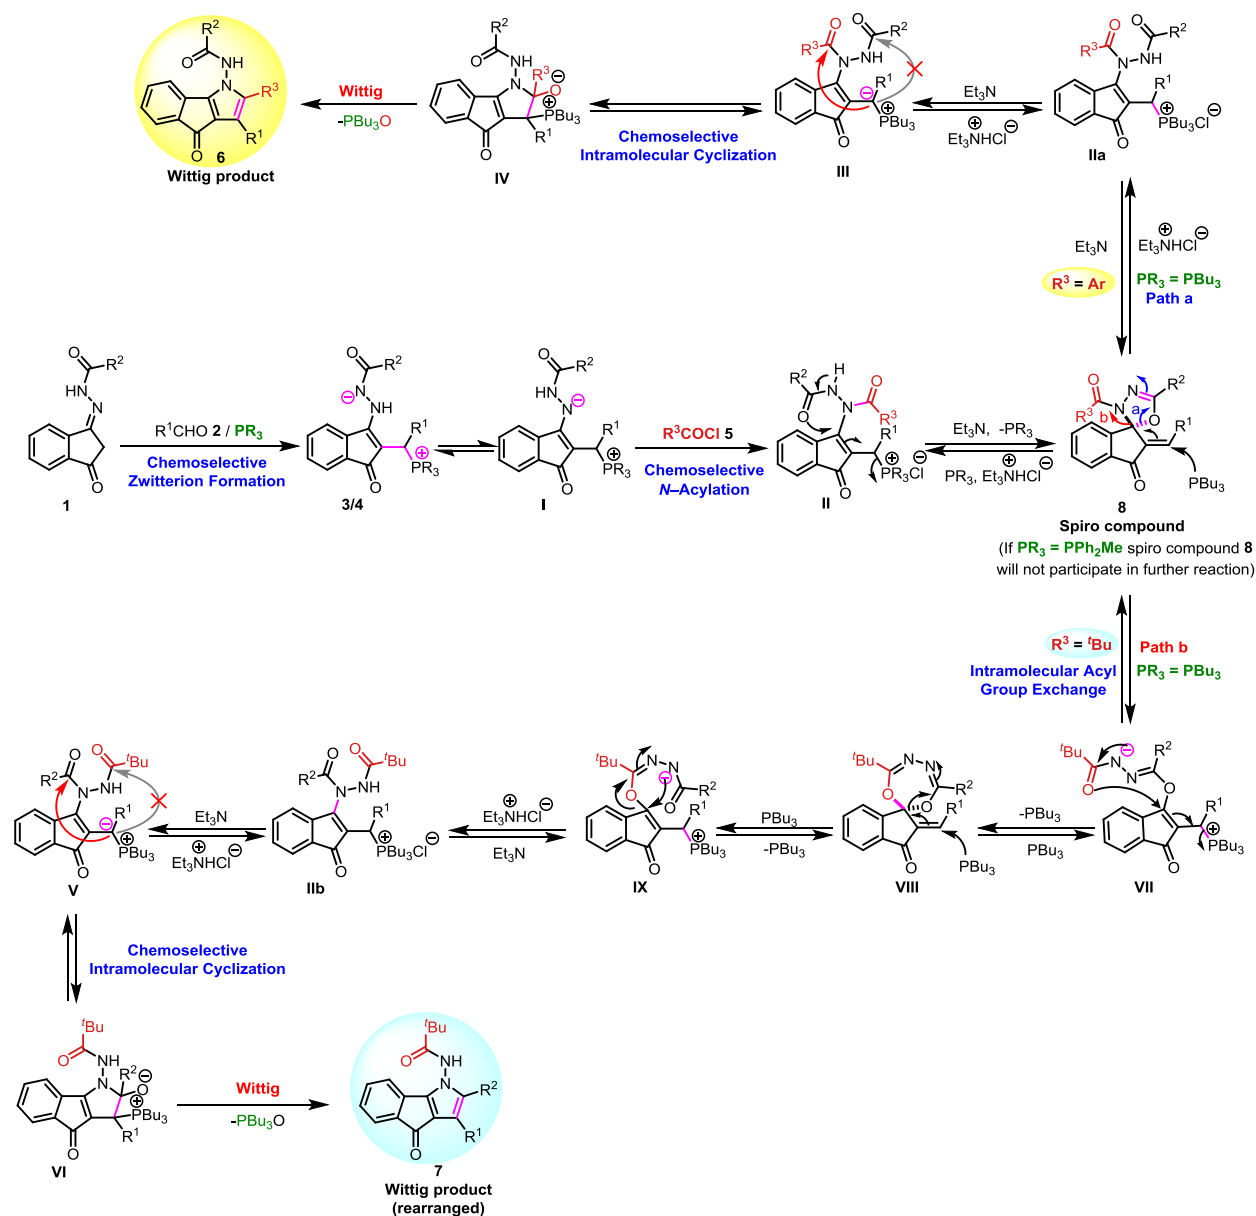

Based on the results and control experiments, a plausible mechanism is depicted in Scheme S2. Initially, a chemoselective tandem three-component reaction of indane-1,3-dione hydrazone **1**,



aldehyde **2**, and phosphine furnished the phosphorus zwitterion **3/4** which could be interchangeable with another possible zwitterion **I**. The chemoselective *N*-acylation of the zwitterion **I** with acyl chloride **5** would generate phosphonium salt **II** that can easily cyclize to give the spiro compound **8** via the allylic substitution with elimination of  $\text{PR}_3$ . When eliminated  $\text{PR}_3$  has less nucleophilic nature such as  $\text{PPh}_2\text{Me}$ , only the spiro compound **8** would be provided. Instead, a more nucleophilic  $\text{PR}_3$ , such as  $\text{PBU}_3$ , would further react with **8** to generate the phosphonium salt **IIa** (Path a). The deprotonation of **IIa** by  $\text{Et}_3\text{N}$  generates ylide **III**, and subsequent chemoselective intramolecular Wittig reaction upon **III** would lead to the indeno[1,2-*b*]pyrrole **6** via the formation of a crucial betaine **IV**. On the other hand, the less reactive and hindered pivaloyl group present on the spiro compound **8** would facilitate the intramolecular acyl group exchange to generate the phosphonium salt **IIb** via the sequence of allylic substitution/elimination of  $\text{PBU}_3$  and rearrangement reaction with the formation of the intermediates **VII–IX** (Path b). Further, deprotonation of **IIb** would provide ylide **V** in the presence of  $\text{Et}_3\text{N}$ , and subsequent chemoselective intramolecular Wittig reaction upon ylide **V** would result in the rearranged indeno[1,2-*b*]pyrrole **7**.

#### **IV. Experimental Procedures:**

##### **a) Typical procedure (TP-1) for the preparation of indenone-benzohydrazide derivatives **1****

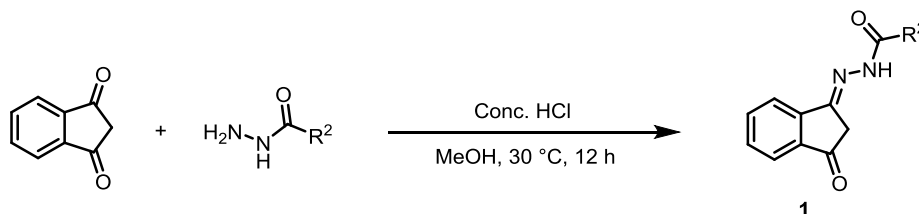

A 100 mL round bottom flask equipped with a magnetic stir bar and a septum was sequentially charged with 1,3-indandione (5 mmol), benzohydrazide derivative (1.05 equiv) in MeOH (50 mL) and Conc. HCl (2-3 drops) at 30 °C and the reaction mixture was stirred for 12 hours. After completion of reaction, filtered the solid by using Bukner funnel. Then washed with cold MeOH (10 mL), and purified by flash chromatography (MeOH/DCM: 1/100) to furnish the desired products **1** as solid in almost quantitative yields.

##### **b) Typical procedure (TP-2) for the preparation of phosphorus zwitterion derivatives **3**<sup>1</sup>**

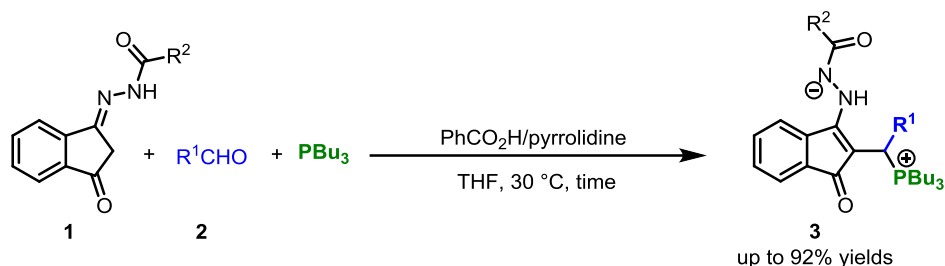

A flame dried and nitrogen-flushed 25-mL round bottom flask equipped with a magnetic stir bar and a septum was sequentially charged with **1** (0.5 mmol), **2** (1.1 equiv), PhCO<sub>2</sub>H (0.1 equiv) and anhydrous THF (5.0 mL). To this stirred reaction mixture, PBU<sub>3</sub> (1.2 equiv) and pyrrolidine (0.1 equiv) were added in sequence. The reaction mixture was stirred for 12 hours at 30 °C. Thereafter, solvent was removed by evaporation in *vacuo*. Purification by flash chromatography (EtOAc/hexanes: 1/3 then MeOH/DCM: 1/100) furnished the desired products **3** in almost quantitative yields.

**Note:** <sup>1</sup>H, <sup>13</sup>C spectra of compounds **1a**, **1i**, **1j** and <sup>1</sup>H, <sup>13</sup>C, <sup>31</sup>P NMR spectra of compounds **3a-3j** showed intense broadening and considerable complexity due to their tautomeric and rotameric equilibria.<sup>2</sup>

**c) Typical procedure (TP-3) for the preparation of indeno[1,2-*b*]pyrrole derivatives 6/7:**

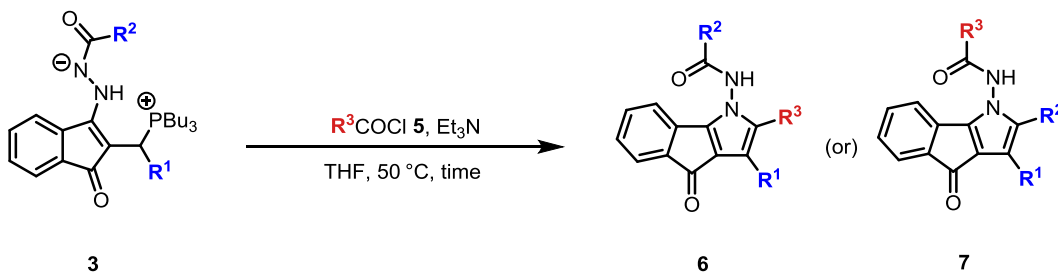

A dry and argon-flushed 10 mL Schlenk flask equipped with a magnetic stir bar and septum was sequentially charged with **3** (0.3 mmol), anhydrous THF (3 mL), acyl chloride **5** (1.1 equiv) and Et<sub>3</sub>N (1.5 equiv). The reaction mixture was stirred for 1-8 h at 50 °C. After completion of the reaction, solvent was removed in *vacuo* and the crude residue was subjected to flash column chromatography on silica gel to obtain the product **6/7**.

**d) Typical procedure (TP-4) for the preparation of spiro-indene-1,2'-[1,3,4]oxadiazol derivatives 8:**

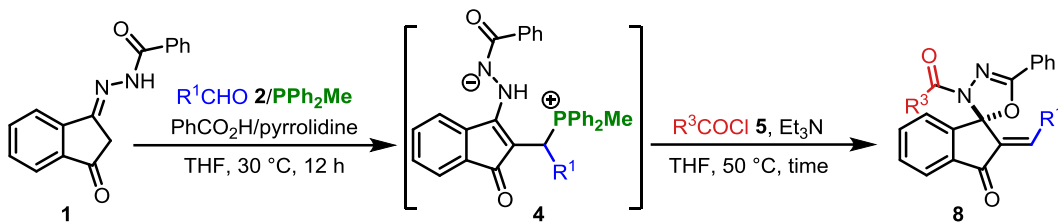

A flame dried and nitrogen-flushed 25-mL round bottom flask equipped with a magnetic stir bar and a septum was sequentially charged with **1** (0.5 mmol), **2** (1.1 equiv), PhCO<sub>2</sub>H (0.1 equiv) and anhydrous THF (5.0 mL). To this stirred reaction mixture, PPh<sub>2</sub>Me (1.2 equiv) and pyrrolidine (0.1 equiv) were added in sequence. The reaction mixture was stirred for 12 hours at 30 °C. Thereafter, solvent with excess volatile substrates were removed by evaporation in *vacuo* and dissolved in anhydrous THF (5 mL), acyl chloride **5** (1.5 equiv) and Et<sub>3</sub>N (2.0 equiv). The reaction mixture was stirred for 1-4 h at 50 °C. After completion of the reaction, solvent was removed in *vacuo* and the crude residue was subjected to flash column chromatography on silica gel to obtain the product **8**.

#### **V. Analytical data for all new compounds:**

##### **(Z)-N'-(3-Oxo-2,3-dihydro-1H-inden-1-ylidene)benzohydrazide (1a)**

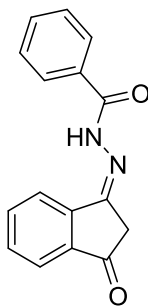

Prepared according to TP-1 from 1,3-Indandione (730.8 mg, 5.0 mmol), benzhydrazide (714.8 mg, 1.05 equiv), in MeOH (50 mL) followed by addition of Conc. HCl (3 drops) at 30 °C for 12 h. Thereafter, filtration of the reaction mixture and washed with cold MeOH (10 mL). Further, purification by flash chromatography (SiO<sub>2</sub>, EtOAc/hexanes: 1/2 and then MeOH/DCM: 1/100) furnished the desired product **1a** as green solid (1.21 g, 92%).

R<sub>f</sub> = 0.51 (MeOH/DCM: 5/95), mp.: 213.8-214.7 °C.

<sup>1</sup>H NMR (400 MHz, DMSO-d<sub>6</sub>, 25 °C) δ/ppm: 10.91 (s, 1H), 8.13 – 7.98 (m, 1H), 7.99 (d, *J* = 8.1 Hz, 2H), 7.83 (t, *J* = 8.1 Hz, 1H), 7.78 (d, *J* = 7.6 Hz, 1H), 7.66 (t, *J* = 7.6 Hz, 1H), 7.60 (t, *J* =

7.3 Hz, 1H), 7.53 (pt,  $J = 7.5$  Hz, 2H), 3.69 (s, 2H).

$^{13}\text{C}$  NMR (100 MHz, DMSO- $d_6$ , 25 °C)  $\delta$ /ppm: 198.4, 164.1, 152.0, 146.4, 138.4, 135.5, 133.7, 131.7, 131.3, 128.6, 128.3, 128.1, 127.5, 122.9, 121.9, 38.7.

IR (KBr)  $\tilde{\nu}$  ( $\text{cm}^{-1}$ ): 3075, 1725, 1698, 1526, 1375, 790.

HRMS (ESI)  $m/z$ :  $[\text{M}+\text{H}]^+$  Calcd for  $\text{C}_{16}\text{H}_{13}\text{N}_2\text{O}_2$  265.0977; found: 265.0975.

**(Z)-4-Chloro-*N'*-(3-oxo-2,3-dihydro-1*H*-inden-1-ylidene)benzohydrazide (1i)**

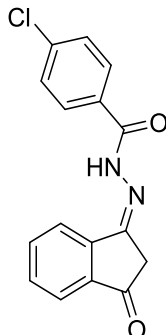

Prepared according to TP-1 from 1,3-Indandione (292.3 mg, 2.0 mmol), 4-chloro benzhydrazide (358.2 mg, 1.05 equiv), in MeOH (20 mL) followed by addition of Conc. HCl (1 drop) at 30 °C for 12 h. Thereafter, filtration of the reaction mixture and washed with cold MeOH (5 mL). Further, purification by flash chromatography ( $\text{SiO}_2$ , EtOAc/hexanes: 1/2 and then MeOH/DCM: 1/100) furnished the desired product **1i** as white solid (507.8 mg, 85%).

$R_f = 0.48$  (MeOH/DCM: 5/95), mp.: 254.6-255.7 °C.

$^1\text{H}$  NMR (400 MHz, DMSO- $d_6$ , 25 °C)  $\delta$ /ppm: 10.96 (s, 1H), 8.07 – 7.97 (m, 1H), 7.92 (d,  $J = 8.4$  Hz, 2H), 7.83 (t,  $J = 7.5$  Hz, 1H), 7.78 (d,  $J = 7.6$  Hz, 1H), 7.66 (t,  $J = 7.1$  Hz, 1H), 7.60 (d,  $J = 8.2$  Hz, 2H), 3.68 (s, 2H).

$^{13}\text{C}$  NMR (100 MHz, DMSO- $d_6$ , 25 °C)  $\delta$ /ppm: 198.3, 163.1, 152.5, 146.3, 138.5, 136.5, 135.5, 132.4, 131.4, 130.0, 128.4, 122.9, 121.9, 38.8.

IR (KBr)  $\tilde{\nu}$  ( $\text{cm}^{-1}$ ): 3070, 1724, 1672, 1510, 1370, 750.

HRMS (ESI)  $m/z$ :  $[\text{M}-\text{H}]^+$  Calcd for  $\text{C}_{16}\text{H}_{10}\text{N}_2\text{O}_2^{35}\text{Cl}$  297.0431; found: 297.0434;  $[\text{M}-\text{H}]^+$  Calcd for  $\text{C}_{16}\text{H}_{10}\text{N}_2\text{O}_2^{37}\text{Cl}$  299.0401; found: 299.0408.

**(Z)-4-Methyl-*N'*-(3-oxo-2,3-dihydro-1*H*-inden-1-ylidene)benzohydrazide (1j)**

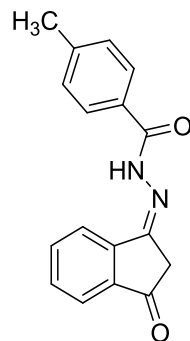

Prepared according to TP-1 from 1,3-Indandione (292.3 mg, 2.0 mmol), 4-methyl benzhydrazide (300.4 mg, 1.05 equiv), in MeOH (20 mL) followed by addition of Conc. HCl (1 drop) at 30 °C for 12 h. Thereafter, filtration of the reaction mixture and washed with cold MeOH (10 mL). Further, purification by flash chromatography (SiO<sub>2</sub>, EtOAc/hexanes: 1/2 and then MeOH/DCM: 1/100) furnished the desired product **1j** as white solid (489.8 mg, 88%).

$R_f$  = 0.45 (MeOH/DCM: 5/95), mp.: 218.3-219.3 °C.

<sup>1</sup>H NMR (400 MHz, DMSO-d<sub>6</sub>, 25 °C) δ/ppm: 10.81 (s, 1H), 8.01 (brs, 1H), 7.86 – 7.80 (m, 3H), 7.78 (d,  $J$  = 7.8 Hz, 1H), 7.66 (t,  $J$  = 7.6 Hz, 1H), 7.33 (d,  $J$  = 8.0 Hz, 2H), 3.68 (s, 2H), 2.38 (s, 3H).

<sup>13</sup>C NMR (100 MHz, DMSO-d<sub>6</sub>, 25 °C) δ/ppm: 198.4, 163.9, 151.7, 146.5, 141.7, 138.4, 135.5, 131.3, 130.8, 129.1, 128.8, 128.1, 127.5, 122.9, 121.8, 38.7, 21.0.

IR (KBr)  $\tilde{\nu}$  (cm<sup>-1</sup>): 3080, 1735, 1680, 1530, 1372, 760.

HRMS (ESI)  $m/z$ : [M+H]<sup>+</sup> Calcd for C<sub>17</sub>H<sub>15</sub>N<sub>2</sub>O<sub>2</sub> 279.1134; found: 279.1133.

**1-Benzoyl-2-(2-((4-bromophenyl)(tributylphosphonio)methyl)-1-oxo-1H-inden-3-yl)hydrazin-1-ide (3a)**

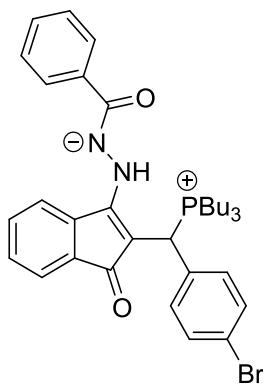

Prepared according to TP-2 from **1** (264.3 mg, 1.0 mmol), 4-bromo benzaldehyde **2a** (203.5 mg, 1.1 equiv), PhCO<sub>2</sub>H (12.2 mg, 0.1 equiv), PBu<sub>3</sub> (318.8 μL (94% purity) 1.2 equiv), 1.2 equiv) and

pyrrolidine (8.2  $\mu\text{L}$ , 0.1 equiv) in anhydrous THF (10 mL) at 30  $^{\circ}\text{C}$  for 5 h. Purification by flash chromatography ( $\text{SiO}_2$ , EtOAc/hexanes: 1/2 and then MeOH/DCM: 1/100) furnished the desired product **3a** as an orange solid (570.2 mg, 90%).

$R_f = 0.33$  (MeOH/DCM: 20/100), mp.: 136.6-140.0  $^{\circ}\text{C}$ .

$^1\text{H NMR}$  (400 MHz,  $\text{CDCl}_3$ , 25  $^{\circ}\text{C}$ )  $\delta/\text{ppm}$ : 11.18 (brs, 1H), 8.12 (dd,  $J = 6.9, 3.1$  Hz, 2H), 7.58 (dd,  $J = 8.6, 1.8$  Hz, 2H), 7.47 (pt,  $J = 7.7$  Hz, 4H), 7.44 – 7.39 (m, 4H), 7.36 (dd,  $J = 7.3, 1.3$  Hz, 1H), 7.33 (td,  $J = 7.4, 1.9$  Hz, 1H), 2.41 – 2.10 (m, 6H), 1.54 – 1.30 (m, 12H), 0.82 (t,  $J = 7.1$  Hz, 9H).

$^{13}\text{C NMR}$  (100 MHz,  $\text{CDCl}_3$ , 25  $^{\circ}\text{C}$ )  $\delta/\text{ppm}$ : 188.5, 168.1, 151.1, 137.9, 136.4, 135.7, 135.1, 132.3, 131.52, 131.48, 129.8, 129.5, 129.3, 127.6, 127.1, 122.35, 122.32, 119.6, 117.2, 94.7, 35.9, 35.5, 24.1, 23.91, 23.85, 20.4, 19.9, 13.1.

$^{31}\text{P NMR}$  (161 MHz,  $\text{CDCl}_3$ , 25  $^{\circ}\text{C}$ )  $\delta/\text{ppm}$ : 34.8.

IR (KBr)  $\tilde{\nu}$  ( $\text{cm}^{-1}$ ): 3450, 2962, 1730, 1644, 1579, 1526, 1379.

HRMS (ESI)  $m/z$ :  $[\text{M}+\text{H}]^+$  Calcd for  $\text{C}_{35}\text{H}_{43}^{79}\text{BrN}_2\text{O}_2\text{P}$  633.2246; found: 633.2245; .  $[\text{M}+\text{H}]^+$  Calcd for  $\text{C}_{35}\text{H}_{43}^{81}\text{BrN}_2\text{O}_2\text{P}$  635.2225; found: 635.2234.

### 1-Benzoyl-2-(2-((4-chlorophenyl)(tributylphosphonio)methyl)-1-oxo-1H-inden-3-yl)hydrazin-1-ide (**3b**)

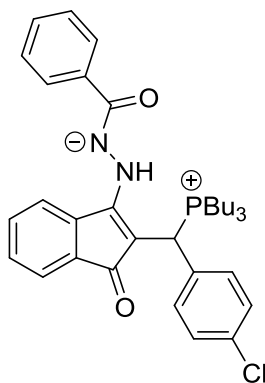

Prepared according to TP-2 from **1** (264.3 mg, 1.0 mmol), 4-chloro benzaldehyde **2b** (154.6 mg, 1.1 equiv),  $\text{PhCO}_2\text{H}$  (12.2 mg, 0.1 equiv),  $\text{PBu}_3$  (318.8  $\mu\text{L}$  (94% purity), 1.2 equiv) and pyrrolidine (8.2  $\mu\text{L}$ , 0.1 equiv) in anhydrous THF (10 mL) at 30  $^{\circ}\text{C}$  for 4 h. Purification by flash chromatography ( $\text{SiO}_2$ , EtOAc/hexanes: 1/2 and then MeOH/DCM: 1/100) furnished the desired product **3b** as an orange solid (538.6 mg, 85%).

$R_f = 0.3$  (MeOH/DCM: 20/100), mp.: 123.4-123.8  $^{\circ}\text{C}$ .

$^1\text{H NMR}$  (400 MHz,  $\text{CDCl}_3$ , 25  $^{\circ}\text{C}$ )  $\delta/\text{ppm}$ : 11.24 (brs, 1H), 8.13 (dd,  $J = 6.8, 2.4$  Hz, 2H), 7.64

(dd,  $J = 8.7, 2.2$  Hz, 2H), 7.46 (t,  $J = 7.8$  Hz, 2H), 7.44 – 7.39 (m, 3H), 7.37 (t,  $J = 7.3$  Hz, 2H), 7.34 – 7.30 (m, 3H), 2.45 – 2.10 (m, 6H), 1.55 – 1.30 (m, 12H), 0.82 (t,  $J = 7.1$  Hz, 9H).

$^{13}\text{C}$  NMR (100 MHz,  $\text{CDCl}_3$ , 25 °C)  $\delta$ /ppm: 188.4, 168.1, 150.9, 138.0, 136.4, 135.7, 134.6, 134.18, 134.15, 131.20, 131.16, 129.8, 129.4, 129.3, 129.2, 127.6, 127.1, 119.6, 117.0, 94.7, 35.9, 35.4, 24.0, 23.89, 23.83, 20.4, 19.9, 13.1.

$^{31}\text{P}$  NMR (161 MHz,  $\text{CDCl}_3$ , 25 °C)  $\delta$ /ppm: 34.4.

IR (KBr)  $\tilde{\nu}$  ( $\text{cm}^{-1}$ ): 3441, 3230, 2958, 1666, 1576, 1379, 1294.

HRMS (ESI)  $m/z$ :  $[\text{M}+\text{H}]^+$  Calcd for  $\text{C}_{35}\text{H}_{43}^{35}\text{ClN}_2\text{O}_2\text{P}$  589.2751; found: 589.2750;  $[\text{M}+\text{H}]^+$  Calcd for  $\text{C}_{35}\text{H}_{43}^{37}\text{ClN}_2\text{O}_2\text{P}$  591.2721; found: 591.2740.

**1-Benzoyl-2-(2-((4-nitrophenyl)(tributylphosphonio)methyl)-1-oxo-1*H*-inden-3-yl)hydrazin-1-ide (3c)**

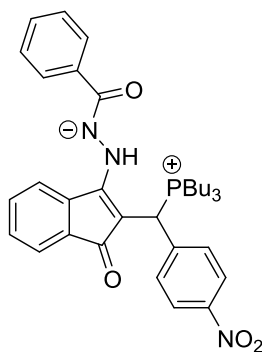

Prepared according to TP-2 from **1** (264.3 mg, 1.0 mmol), 4-nitro benzaldehyde **2c** (166.2 mg, 1.1 equiv),  $\text{PhCO}_2\text{H}$  (12.2 mg, 0.1 equiv),  $\text{PBu}_3$  (318.8  $\mu\text{L}$  (94% purity), 1.2 equiv) and pyrrolidine (8.2  $\mu\text{L}$ , 0.1 equiv) in anhydrous THF (10 mL) at 30 °C for 6 h. Purification by flash chromatography ( $\text{SiO}_2$ , EtOAc/hexanes: 1/2 and then MeOH/DCM: 1/100) furnished the desired product **3c** as an orange solid (533.7 mg, 89%).

$R_f = 0.23$  (MeOH/DCM: =20/100), mp.: 124.6-125 °C.

$^1\text{H}$  NMR (400 MHz,  $\text{CDCl}_3$ , 25 °C)  $\delta$ /ppm: 11.22 (brs, 1H), 8.16 (d,  $J = 8.7$  Hz, 2H), 8.08 (d,  $J = 7.4$  Hz, 2H), 7.89 (d,  $J = 8.4$  Hz, 2H), 7.49 (d,  $J = 7.3$  Hz, 2H), 7.45 (d,  $J = 7.4$  Hz, 1H), 7.43 – 7.36 (m, 4H), 7.31 (pt,  $J = 7.3$  Hz, 1H), 2.46 – 2.30 (m, 3H), 2.30 – 2.14 (m, 3H), 1.52 – 1.32 (m, 12H), 0.81 (t,  $J = 6.8$  Hz, 9H).

$^{13}\text{C}$  NMR (100 MHz,  $\text{CDCl}_3$ , 25 °C)  $\delta$ /ppm: 188.4, 168.0, 151.1, 147.2, 143.6, 137.5, 136.0, 135.3, 130.72, 130.68, 129.9, 129.5, 129.4, 127.6, 126.9, 124.1, 119.7, 117.2, 93.8, 36.3, 35.9, 23.9, 23.76, 23.71, 20.3, 19.9, 13.0.

$^{31}\text{P}$  NMR (161 MHz,  $\text{CDCl}_3$ , 25 °C)  $\delta$ /ppm: 35.6.

IR (KBr)  $\tilde{\nu}$  ( $\text{cm}^{-1}$ ): 3441, 2092, 1638, 1549, 1524, 1346.

HRMS (ESI)  $m/z$ :  $[\text{M}+\text{H}]^+$  Calcd for  $\text{C}_{35}\text{H}_{43}\text{N}_3\text{O}_4\text{P}$  600.2991; found: 600.2994.

**1-Benzoyl-2-(2-((4-methoxyphenyl)(tributylphosphonio)methyl)-1-oxo-1H-inden-3-yl)hydrazin-1-ide (3d)**

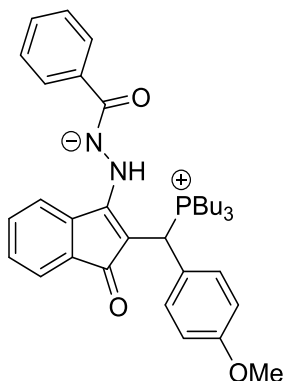

Prepared according to TP-2 from **1** (264.3 mg, 1.0 mmol), 4-methoxy benzaldehyde **2d** (133.8  $\mu\text{L}$ , 1.1 equiv),  $\text{PhCO}_2\text{H}$  (12.2 mg, 0.1 equiv),  $\text{PBu}_3$  (318.8  $\mu\text{L}$  (94% purity), 1.2 equiv) and pyrrolidine (8.2  $\mu\text{L}$ , 0.1 equiv) in anhydrous THF (10 mL) at 30 °C for 4.5 h. Purification by flash chromatography ( $\text{SiO}_2$ , EtOAc/hexanes: 1/2 and then MeOH/DCM: 1/100) furnished the desired product **3d** as orange solid (538.0 mg, 92%).

$R_f$  = 0.18 (MeOH/DCM: 20/100), mp.: 145.5-145.9 °C.

$^1\text{H}$  NMR (400 MHz,  $\text{CDCl}_3$ , 25 °C)  $\delta$ /ppm: 11.15 (brs, 1H), 8.15 (d,  $J$  = 3.6 Hz, 2H), 7.55 (d,  $J$  = 7.6 Hz, 2H), 7.46 (pt,  $J$  = 6.9 Hz, 2H), 7.42 – 7.37 (m, 3H), 7.35 (t,  $J$  = 7.5 Hz, 1H), 7.33 – 7.26 (m, 2H), 7.14 (d,  $J$  = 7.8 Hz, 2H), 2.30 (s, 3H), 2.29 – 2.13 (m, 6H), 1.48 – 1.30 (m, 12H), 0.80 (t,  $J$  = 6.9 Hz, 9H).

$^{13}\text{C}$  NMR (100 MHz,  $\text{CDCl}_3$ , 25 °C)  $\delta$ /ppm: 188.6, 167.9, 151.2, 138.0, 136.6, 135.9, 132.8, 129.84, 129.82, 129.69, 129.65, 129.3, 129.1, 127.6, 127.2, 119.4, 117.0, 95.5, 35.9, 35.5, 24.1, 23.9, 23.8, 21.0, 20.4, 19.9, 13.1.

$^{31}\text{P}$  NMR (161 MHz,  $\text{CDCl}_3$ , 25 °C)  $\delta$ /ppm: 34.6.

IR (KBr)  $\tilde{\nu}$  ( $\text{cm}^{-1}$ ): 3217, 2962, 1650, 1579, 1526, 1381, 1292.

HRMS (ESI)  $m/z$ :  $[\text{M}+\text{H}]^+$  Calcd for  $\text{C}_{36}\text{H}_{46}\text{N}_2\text{O}_3\text{P}$  585.3246; found: 585.3245.

**1-Benzoyl-2-(1-oxo-2-(phenyl(tributylphosphonio)methyl)-1H-inden-3-yl)hydrazin-1-ide (3e)**



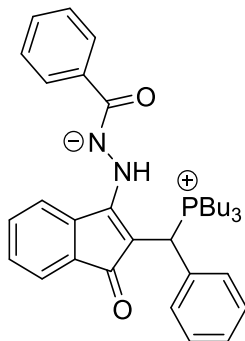

Prepared according to TP-2 from **1** (264.3 mg, 1.0 mmol), benzaldehyde **2e** (111.8  $\mu$ L, 1.1 equiv), PhCO<sub>2</sub>H (12.2 mg, 0.1 equiv), PBu<sub>3</sub> (318.8  $\mu$ L (94% purity), 1.2 equiv) and pyrrolidine (8.2  $\mu$ L, 0.1 equiv) in anhydrous THF (10 mL) at 30 °C for 5 h. Purification by flash chromatography (SiO<sub>2</sub>, EtOAc/hexanes: 1/2 and then MeOH/DCM: 1/100) furnished the desired product **3e** as an orange solid (471.5 mg, 85%).

R<sub>f</sub> = 0.28 (MeOH/DCM: 20/100), mp.: 113.6-114 °C.

**<sup>1</sup>H NMR** (400 MHz, CDCl<sub>3</sub>, 25 °C)  $\delta$ /ppm: 11.24 (brs, 1H), 8.15 (d,  $J$  = 7.3 Hz, 2H), 7.67 (d,  $J$  = 7.2 Hz, 2H), 7.47 (d,  $J$  = 7.1 Hz, 1H), 7.44 (d,  $J$  = 7.2 Hz, 1H), 7.42 – 7.38 (m, 3H), 7.33 (t,  $J$  = 7.2 Hz, 4H), 7.30 – 7.24 (m, 2H), 2.42 – 2.05 (m, 6H), 1.48 – 1.22 (m, 12H), 0.78 (t,  $J$  = 6.8 Hz, 9H).

**<sup>13</sup>C NMR** (100 MHz, CDCl<sub>3</sub>, 25 °C)  $\delta$ /ppm: 188.7, 167.9, 151.4, 137.8, 136.4, 135.9, 129.72, 129.67, 129.3, 129.13, 129.11, 128.1, 127.5, 127.1, 119.5, 117.0, 95.3, 36.3, 35.8, 23.96, 23.81, 23.77, 23.72, 20.3, 19.8, 13.0.

**<sup>31</sup>P NMR** (161 MHz, CDCl<sub>3</sub>, 25 °C)  $\delta$ /ppm: 34.9.

**IR** (KBr)  $\tilde{\nu}$  (cm<sup>-1</sup>): 3441, 2962, 1642, 1572, 1524, 1381.

**HRMS** (ESI)  $m/z$ : [M+H]<sup>+</sup> Calcd for C<sub>35</sub>H<sub>44</sub>N<sub>2</sub>O<sub>2</sub>P 555.3140; found: 555.3141.

**1-Benzoyl-2-(2-((3-chlorophenyl)(tributylphosphonio)methyl)-1-oxo-1H-inden-3-yl)hydrazin-1-ide (3f)**

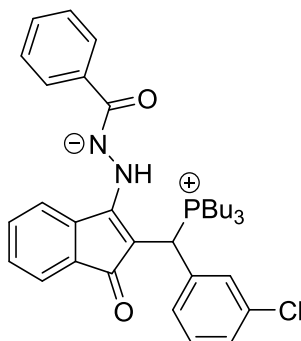

Prepared according to TP-2 from **1** (264.3 mg, 1.0 mmol), 3-chloro benzaldehyde **2f** (124.6  $\mu\text{L}$ , 1.1 equiv),  $\text{PhCO}_2\text{H}$  (12.2 mg, 0.1 equiv),  $\text{PBu}_3$  (318.8  $\mu\text{L}$  (94% purity), 1.2 equiv) and pyrrolidine (8.2  $\mu\text{L}$ , 0.1 equiv) in anhydrous THF (10 mL) at 30 °C for 5 h. Purification by flash chromatography ( $\text{SiO}_2$ , EtOAc/hexanes: 1/2 and then MeOH/DCM: 1/100) furnished the desired product **3f** as an orange solid (494.9 mg, 84%).

$R_f$  = 0.23 (MeOH/DCM: 20/100), mp.: 110.4-110.8 °C.

**$^1\text{H}$  NMR** (400 MHz,  $\text{CDCl}_3$ , 25 °C)  $\delta$ /ppm: 11.16 (brs, 1H), 8.11 (d,  $J$  = 6.7 Hz, 2H), 7.69 (s, 1H), 7.58 (s, 1H), 7.47 (d,  $J$  = 7.2 Hz, 1H), 7.44 (d,  $J$  = 7.0 Hz, 1H), 7.42 – 7.30 (m, 6H), 7.28 – 7.26 (m, 2H), 2.35 – 2.10 (m, 6H), 1.47 – 1.26 (m, 12H), 0.78 (t,  $J$  = 6.8 Hz, 9H).

**$^{13}\text{C}$  NMR** (100 MHz,  $\text{CDCl}_3$ , 25 °C)  $\delta$ /ppm: 188.7, 168.1, 151.3, 138.0, 137.8, 136.2, 135.7, 134.86, 134.84, 130.40, 130.38, 129.8, 129.5, 129.2, 128.3, 128.02, 127.98, 127.6, 127.1, 119.6, 117.1, 94.5, 36.0, 35.6, 23.9, 23.79, 23.74, 20.3, 19.8, 13.0.

**$^{31}\text{P}$  NMR** (161 MHz,  $\text{CDCl}_3$ , 25 °C)  $\delta$ /ppm: 35.3.

**IR** (KBr)  $\tilde{\nu}$  ( $\text{cm}^{-1}$ ): 3432, 2087, 1640, 1520, 1471, 1384.

**HRMS** (ESI)  $m/z$ :  $[\text{M}+\text{H}]^+$  Calcd for  $\text{C}_{35}\text{H}_{43}^{35}\text{ClN}_2\text{O}_2\text{P}$  589.2751; found: 589.2748;  $[\text{M}+\text{H}]^+$  Calcd for  $\text{C}_{35}\text{H}_{43}^{37}\text{ClN}_2\text{O}_2\text{P}$  591.2721; found: 591.2740.

**1-Benzoyl-2-(2-(2-chlorophenyl)(tributylphosphonio)methyl)-1-oxo-1H-inden-3-yl)hydrazin-1-ide (3g)**

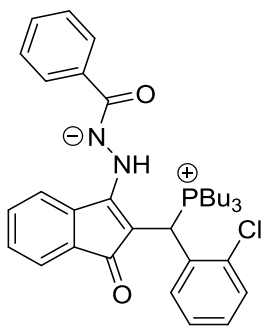

Prepared according to TP-2 from **1** (264.3 mg, 1.0 mmol), 2-chloro benzaldehyde **2g** (123.70  $\mu\text{L}$ , 1.1 equiv),  $\text{PhCO}_2\text{H}$  (12.2 mg, 0.1 equiv),  $\text{PBu}_3$  (318.8  $\mu\text{L}$  (94% purity), 1.2 equiv) and pyrrolidine (8.2  $\mu\text{L}$ , 0.1 equiv) in anhydrous THF (10 mL) at 30 °C for 5.5 h. Purification by flash chromatography ( $\text{SiO}_2$ , EtOAc/hexanes: 1/2 and then MeOH/DCM: 1/100) furnished the desired product **3g** as an orange solid (471.3 mg, 80%).

$R_f$  = 0.18 (MeOH/DCM: 20/100), mp.: 136.8-137.2 °C.

**$^1\text{H}$  NMR** (400 MHz,  $\text{CDCl}_3$ , 25 °C)  $\delta$ /ppm: 11.50 (brs, 1H), 8.42 (d,  $J$  = 8.3 Hz, 1H), 8.21 (d,  $J$  =

7.7 Hz, 2H), 7.74 (d,  $J = 18.1$  Hz, 1H), 7.48 (t,  $J = 7.3$  Hz, 2H), 7.42 – 7.30 (m, 6H), 7.26 (pt,  $J = 7.8$  Hz, 1H), 7.19 (t,  $J = 7.8$  Hz, 1H), 2.45 – 2.25 (m, 6H), 1.50 – 1.30 (m, 12H), 0.79 (t,  $J = 6.7$  Hz, 9H).

$^{13}\text{C}$  NMR (100 MHz,  $\text{CDCl}_3$ , 25 °C)  $\delta$ /ppm: 188.7, 168.7, 150.4, 137.8, 136.3, 135.8, 134.2, 133.5, 132.78, 132.72, 129.9, 129.7, 129.3, 129.1, 127.6, 127.3, 119.5, 116.9, 94.2, 33.2, 32.8, 24.0, 23.9, 23.77, 23.73, 20.6, 20.2, 13.1.

$^{31}\text{P}$  NMR (161 MHz,  $\text{CDCl}_3$ , 25 °C)  $\delta$ /ppm: 37.9.

IR (KBr)  $\tilde{\nu}$  ( $\text{cm}^{-1}$ ): 3446, 2070, 1633, 1576, 1465, 1377.

HRMS (ESI)  $m/z$ :  $[\text{M}+\text{H}]^+$  Calcd for  $\text{C}_{35}\text{H}_{43}^{35}\text{ClN}_2\text{O}_2\text{P}$  589.2751; found: 589.2748;  $[\text{M}+\text{H}]^+$  Calcd for  $\text{C}_{35}\text{H}_{43}^{37}\text{ClN}_2\text{O}_2\text{P}$  591.2721; found: 591.2733

**1-Benzoyl-2-(2-((2-methoxyphenyl)(tributylphosphonio)methyl)-1-oxo-1*H*-inden-3-yl)hydrazin-1-ide (3h)**

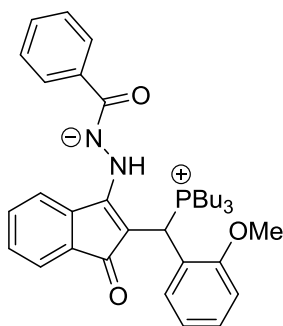

Prepared according to TP-2 from **1** (264.3 mg, 1.0 mmol), 2-methoxy benzaldehyde **2h** (132.9  $\mu\text{L}$ , 1.1 equiv),  $\text{PhCO}_2\text{H}$  (12.2 mg, 0.1 equiv),  $\text{PBU}_3$  (318.8  $\mu\text{L}$  (94% purity), 1.2 equiv) and pyrrolidine (8.2  $\mu\text{L}$ , 0.1 equiv) in anhydrous THF (10 mL) at 30 °C for 6 h. Purification by flash chromatography ( $\text{SiO}_2$ , EtOAc/hexanes: 1/2 and then MeOH/DCM: 1/100) furnished the desired product **3h** as an orange solid (479.5 mg, 82%).

$R_f = 0.18$  (MeOH/DCM: 20/100), mp.: 145.5-145.9 °C.

$^1\text{H}$  NMR (400 MHz,  $\text{CDCl}_3$ , 25 °C)  $\delta$ /ppm: 11.26 (brs, 1H), 8.25 (d,  $J = 7.5$  Hz, 2H), 8.03 (d,  $J = 8.3$  Hz, 1H), 7.77 (d,  $J = 19.2$  Hz, 1H), 7.48 (t,  $J = 7.3$  Hz, 2H), 7.40 – 7.34 (m, 4H), 7.32 (d,  $J = 7.5$  Hz, 1H), 7.22 (t,  $J = 7.6$  Hz, 1H), 6.93 (t,  $J = 7.5$  Hz, 1H), 6.85 (d,  $J = 8.3$  Hz, 1H), 3.81 (s, 3H), 2.38 – 2.10 (m, 6H), 1.45 – 1.25 (m, 12H), 0.76 (t,  $J = 7.0$  Hz, 9H).

$^{13}\text{C}$  NMR (100 MHz,  $\text{CDCl}_3$ , 25 °C)  $\delta$ /ppm: 189.3, 167.8, 155.72, 155.67, 150.8, 137.9, 136.4, 136.0, 132.72, 132.69, 129.5, 129.19, 129.14, 129.11, 128.98, 127.38, 127.30, 124.0, 121.63, 121.60, 119.3, 116.8, 110.5, 95.5, 55.3, 28.9, 28.4, 34.06, 23.92, 23.73, 23.68, 20.7, 20.3, 13.1.

**<sup>31</sup>P NMR** (161 MHz, CDCl<sub>3</sub>, 25 °C) δ/ppm: 36.5.

**IR** (KBr)  $\tilde{\nu}$  (cm<sup>-1</sup>): 3428, 2307, 1640, 1580, 1555, 1388.

**HRMS** (ESI) *m/z*: [M+H]<sup>+</sup> Calcd for C<sub>36</sub>H<sub>46</sub>N<sub>2</sub>O<sub>3</sub>P 585.3246; found: 585.3245.

**2-(2-((4-Bromophenyl)(tributylphosphonio)methyl)-1-oxo-1*H*-inden-3-yl)-1-(4-chlorobenzoyl)hydrazin-1-ide (**3i**)**

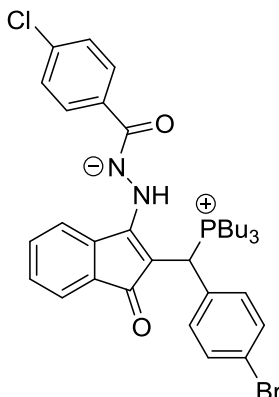

Prepared according to TP-2 from **1b** (298.7 mg, 1.0 mmol), 4-bromo benzaldehyde **2i** (203.5 mg, 1.1 equiv), PhCO<sub>2</sub>H (12.2 mg, 0.1 equiv), PBU<sub>3</sub> (318.8  $\mu$ L (94% purity), 1.2 equiv) and pyrrolidine (8.2  $\mu$ L, 0.1 equiv) in anhydrous THF (10 mL) at 30 °C for 5 h. Purification by flash chromatography (SiO<sub>2</sub>, EtOAc/hexanes: 1/2 and then MeOH/DCM: 1/100) furnished the desired product **3i** as an orange solid (574.5 mg, 86%).

*R<sub>f</sub>* = 0.28 (MeOH/DCM: 20/100), mp.: 116.8-117.2 °C.

**<sup>1</sup>H NMR** (400 MHz, CDCl<sub>3</sub>, 25 °C)  $\delta$ /ppm: 10.99 (brs, 1H), 8.04 (d, *J* = 7.6 Hz, 2H), 7.53 (d, *J* = 8.6 Hz, 2H), 7.51 – 7.44 (m, 4H), 7.37 (d, *J* = 8.1 Hz, 4H), 7.23 (d, *J* = 17.9 Hz, 1H), 2.38 – 2.13 (m, 6H), 1.50 – 1.35 (m, 12H), 0.83 (t, *J* = 6.8 Hz, 9H).

**<sup>13</sup>C NMR** (100 MHz, CDCl<sub>3</sub>, 25 °C)  $\delta$ /ppm: 188.8, 167.2, 151.3, 136.6, 136.3, 135.7, 135.0, 132.4, 131.45, 131.41, 130.0, 129.7, 128.5, 127.8, 122.49, 122.46, 119.7, 117.2, 94.7, 36.0, 35.6, 24.12, 23.97, 23.92, 20.4, 20.0, 13.2.

**<sup>31</sup>P NMR** (161 MHz, CDCl<sub>3</sub>, 25 °C)  $\delta$ /ppm: 34.8.

**IR** (KBr)  $\tilde{\nu}$  (cm<sup>-1</sup>): 3432, 2962, 2360, 1649, 1574, 1458, 1320.

**HRMS** (ESI) *m/z*: [M+H]<sup>+</sup> Calcd for C<sub>35</sub>H<sub>42</sub><sup>79</sup>Br<sup>35</sup>ClN<sub>2</sub>O<sub>2</sub>P 667.1856; found: 667.1857; [M+H]<sup>+</sup> Calcd for C<sub>35</sub>H<sub>42</sub><sup>79</sup>Br<sup>37</sup>ClN<sub>2</sub>O<sub>2</sub>P 669.1835; found: 668.1842; [M+H]<sup>+</sup> Calcd for C<sub>35</sub>H<sub>42</sub><sup>81</sup>Br<sup>35</sup>ClN<sub>2</sub>O<sub>2</sub>P 669.1835; found: 688.1842 [M+H]<sup>+</sup> Calcd for C<sub>35</sub>H<sub>42</sub><sup>81</sup>Br<sup>37</sup>ClN<sub>2</sub>O<sub>2</sub>P 671.1806; found: 671.1829.

**2-(2-((4-Bromophenyl)(tributylphosphonio)methyl)-1-oxo-1*H*-inden-3-yl)-1-(4-methylbenzoyl)hydrazin-1-ide (3j)**

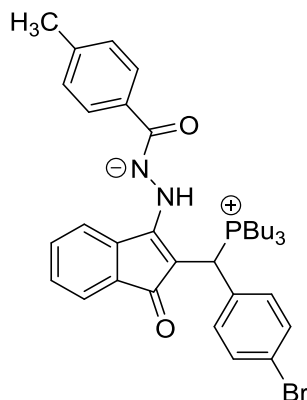

Prepared according to TP-2 from **1c** (278.3 mg, 1.0 mmol), 4-bromo benzaldehyde **2j** (203.5 mg, 1.1 equiv), PhCO<sub>2</sub>H (12.2 mg, 0.1 equiv), PBU<sub>3</sub> (318.8  $\mu$ L (94% purity), 1.2 equiv) and pyrrolidine (8.2  $\mu$ L, 0.1 equiv) in anhydrous THF (10 mL) at 30 °C for 5 h. Purification by flash chromatography (SiO<sub>2</sub>, EtOAc/hexanes: 1/2 and then MeOH/DCM: 1/100) furnished the desired product **3j** as an orange solid (582.6 mg, 90%).

R<sub>f</sub> = 0.15 (MeOH/DCM: 20/100), mp.: 139.4-139.8 °C.

**<sup>1</sup>H NMR** (400 MHz, CDCl<sub>3</sub>, 25 °C)  $\delta$ /ppm: 8.01 (d, *J* = 7.9 Hz, 2H), 7.57 (d, *J* = 8.1 Hz, 2H), 7.46 (d, *J* = 8.1 Hz, 4H), 7.39 – 7.30 (m, 3H), 7.20 (d, *J* = 7.9 Hz, 2H), 2.40 (s, 3H), 2.36 – 2.13 (m, 6H), 1.50 – 1.30 (m, 12H), 0.82 (t, *J* = 6.8 Hz, 9H).

**<sup>13</sup>C NMR** (100 MHz, CDCl<sub>3</sub>, 25 °C)  $\delta$ /ppm: 188.4, 168.2, 150.9, 139.3, 136.5, 135.7, 135.2, 132.3, 131.58, 131.54, 129.8, 129.5, 128.4, 127.1, 122.4, 119.6, 117.9, 94.7, 36.1, 35.6, 24.1, 23.95, 23.90, 21.4, 20.4, 19.9, 13.2.

**<sup>31</sup>P NMR** (161 MHz, CDCl<sub>3</sub>, 25 °C)  $\delta$ /ppm: 34.7.

**IR** (KBr)  $\tilde{\nu}$  (cm<sup>-1</sup>): 3424, 2958, 2325, 1614, 1574 1465.

**HRMS** (ESI) *m/z*: [M+H]<sup>+</sup> Calcd for C<sub>36</sub>H<sub>45</sub><sup>79</sup>BrN<sub>2</sub>O<sub>2</sub>P 647.2402; found: 647.2404; [M+H]<sup>+</sup> Calcd for C<sub>36</sub>H<sub>45</sub><sup>81</sup>BrN<sub>2</sub>O<sub>2</sub>P 649.2382; found: 649.2393.

***N*-(3-(4-Bromophenyl)-4-oxo-2-phenylindeno[1,2-*b*]pyrrol-1(4*H*)-yl)benzamide (6aa)**

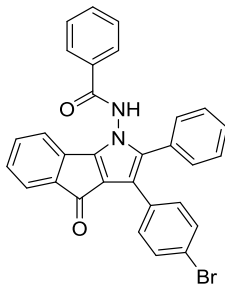

Following the TP-3, **6aa** was obtained from **3a** (190.2 mg, 0.3 mmol), benzoyl chloride **5a** (38.3  $\mu\text{L}$ , 1.1 equiv) and triethylamine (63  $\mu\text{L}$ , 1.5 equiv). The residue was purified by column chromatography ( $\text{SiO}_2$ , Hexanes/EtOAc= 85:15) to give as an orange solid (137.1 mg, 88% yield).  $R_f$ = 0.53 (EtOAc:Hexanes = 1:2); mp = 220.3-221.0  $^\circ\text{C}$ .

**$^1\text{H}$  NMR** (400 MHz,  $\text{CDCl}_3$ , 25  $^\circ\text{C}$ )  $\delta$ /ppm: 9.23 (s, 1H), 7.64 (d,  $J$  = 7.9 Hz, 2H), 7.55 (t,  $J$  = 7.3 Hz, 1H), 7.38 (t,  $J$  = 7.8 Hz, 2H), 7.31 (td,  $J$  = 7.1, 2.3 Hz, 1H), 7.28 – 7.26 (m, 1H), 7.25 – 7.24 (m, 1H), 7.23 (d,  $J$  = 2.5 Hz, 4H), 7.22 – 7.19 (m, 3H), 6.99 (t,  $J$  = 7.4 Hz, 1H), 6.94 (t,  $J$  = 7.2 Hz, 1H), 6.65 (d,  $J$  = 7.0 Hz, 1H).

**$^{13}\text{C}$  NMR** (100 MHz,  $\text{CDCl}_3$ , 25  $^\circ\text{C}$ )  $\delta$ /ppm: 186.3, 166.6, 151.4, 139.0, 136.3, 134.0, 133.2, 132.8, 131.2, 131.1, 130.7, 130.5, 130.3, 129.1, 128.9, 128.4, 127.3, 123.4, 120.8, 119.4, 119.2, 117.1.

**IR** (KBr)  $\tilde{\nu}$  ( $\text{cm}^{-1}$ ): 3239, 2923, 1721, 1699, 1675, 1493, 1278, 1072, 893, 755.

**HRMS** (ESI)  $m/z$ :  $[\text{M}+\text{H}]^+$  Calcd for  $\text{C}_{30}\text{H}_{20}^{79}\text{BrN}_2\text{O}_2$  519.0708; found: 519.0706;  $[\text{M}+\text{H}]^+$  Calcd for  $\text{C}_{30}\text{H}_{20}^{81}\text{BrN}_2\text{O}_2$  521.0688; found: 521.0690.

#### General procedure for the gram-scale preparation of indenopyrrole derivative **6aa**:

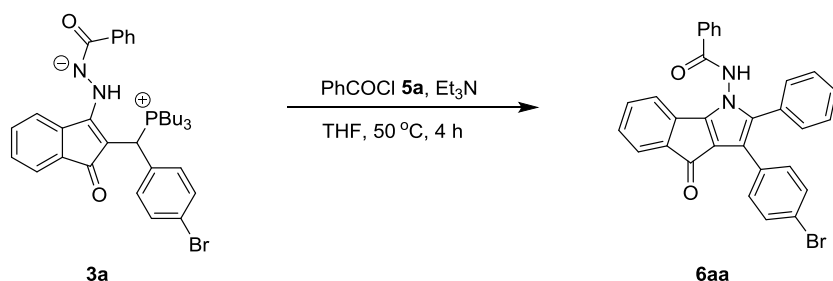

A dry and argon-flushed 100 mL Schlenk flask equipped with a magnetic stir bar and septum was sequentially charged with **3a** (1.267 g, 2 mmol), anhydrous THF (20 mL), benzoyl chloride **5a** (256  $\mu\text{L}$ , 1.1 equiv) and  $\text{Et}_3\text{N}$  (400  $\mu\text{L}$ , 1.5 equiv). The reaction mixture was stirred for 4 h at 50  $^\circ\text{C}$ . After completion of the reaction, solvent was removed in *vacuo* and the crude residue was subjected to flash column chromatography ( $\text{SiO}_2$ , Hexanes/EtOAc= 85:15) to give the product **6aa** in 87% yield (0.903 g).

**General procedure for the preparation of indenopyrrole derivative **6aa** from spiro-indene-1,2'-[1,3,4]oxadiazol **8aa**:**

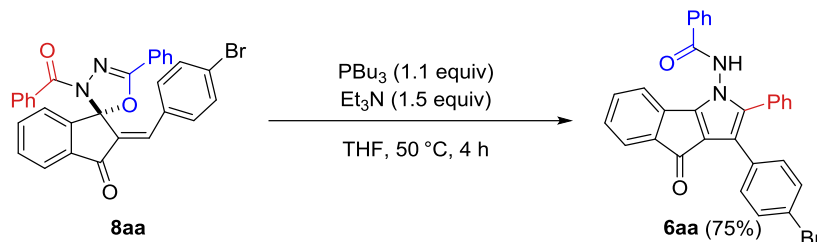

A dry and argon-flushed 10 mL Schlenk flask equipped with a magnetic stir bar and septum was sequentially charged with **8aa** (107.1 mg, 0.2 mmol), anhydrous THF (2 mL), PBU<sub>3</sub> (54.3 μL, 1.1 equiv) and Et<sub>3</sub>N (40.0 μL, 1.5 equiv). The reaction mixture was stirred for 4 h at 50 °C. After completion of the reaction, solvent was removed in *vacuo* and the crude residue was subjected to flash column chromatography (SiO<sub>2</sub>, Hexanes/EtOAc= 85:15) to give the product **6aa** in 75% yield (78.0 mg).

***N*-(3-(4-Chlorophenyl)-4-oxo-2-phenylindeno[1,2-*b*]pyrrol-1(4*H*)-yl)benzamide (6ba)**

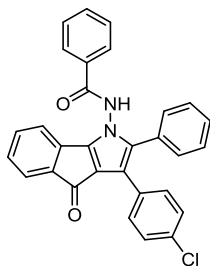

Following the TP-3, **6ba** was obtained from **3b** (176.7 mg, 0.3 mmol), benzoyl chloride **5a** (38.3 μL, 1.1 equiv) and triethylamine (63 μL, 1.5 equiv). The residue was purified by column chromatography (SiO<sub>2</sub>, Hexanes/EtOAc= 85:15) to give as an orange solid (133.9 mg, 94% yield). *R*<sub>f</sub>= 0.55 (EtOAc:Hexanes = 1:2); mp = 145.9-146.5 °C.

**<sup>1</sup>H NMR** (400 MHz, CDCl<sub>3</sub>, 25 °C) δ/ppm: 9.79 (s, 1H), 7.60 (d, *J* = 7.9 Hz, 2H), 7.49 (t, *J* = 7.4 Hz, 1H), 7.31 (d, *J* = 7.6 Hz, 2H), 7.30-7.14 (m, 7H), 7.09 (d, *J* = 7.0 Hz, 1H), 7.0 (d, *J* = 8.6 Hz, 2H), 6.97-6.82 (m, 2H), 6.55 (d, *J* = 6.80 Hz, 1H).

**<sup>13</sup>C NMR** (100 MHz, CDCl<sub>3</sub>, 25 °C) δ/ppm: 186.4, 166.8, 151.3, 138.9, 136.4, 133.9, 133.1, 132.7, 132.5, 130.7, 130.6, 130.4, 130.0, 129.1, 129.0, 128.8, 128.3, 128.1, 127.3, 123.3, 119.3, 119.1, 117.0.

**IR** (KBr)  $\tilde{\nu}$  (cm<sup>-1</sup>): 3243, 2914, 1730, 1701, 1670, 1607, 1493, 1092, 850, 740.

**HRMS** (ESI)  $m/z$ :  $[M+H]^+$  Calcd for  $C_{30}H_{20}^{35}ClN_2O_2$  475.1213; found: 475.1213;  $[M+H]^+$  Calcd for  $C_{30}H_{20}^{37}ClN_2O_2$  477.1184; found: 477.1197.

***N*-(3-(4-Nitrophenyl)-4-oxo-2-phenylindeno[1,2-*b*]pyrrol-1(4*H*)-yl)benzamide (6ca)**

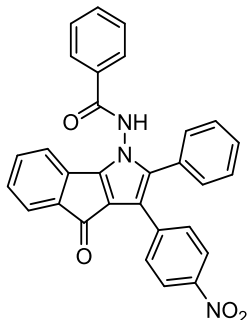

Following the TP-3, **6ca** was obtained from **3c** (179.9 mg, 0.3 mmol), benzoyl chloride **5a** (38.3  $\mu$ L, 1.1 equiv) and triethylamine (63  $\mu$ L, 1.5 equiv). The residue was purified by column chromatography (SiO<sub>2</sub>, Hexanes/EtOAc= 82:18) to give as an orange solid (126.7 mg, 87% yield).  $R_f$ = 0.43 (EtOAc:Hexanes =1:2); mp = 161.4-161.9 °C.

**<sup>1</sup>H NMR** (400 MHz, DMSO-*d*<sub>6</sub>, 25 °C)  $\delta$ /ppm: 12.24 (s, 1H), 8.13 (d,  $J$  = 8.8 Hz, 2H), 7.80 (d,  $J$  = 7.5 Hz, 2H), 7.65 (d,  $J$  = 8.8 Hz, 3H), 7.55 (t,  $J$  = 7.5 Hz, 2H), 7.48-7.40 (m, 4H), 7.40-7.32 (m, 3H), 7.24 (t,  $J$  = 7.6 Hz, 1H), 6.97 (d,  $J$  = 7.2 Hz, 1H).

**<sup>13</sup>C NMR** (100 MHz, DMSO-*d*<sub>6</sub>, 25 °C)  $\delta$ /ppm: 184.9, 166.1, 151.3, 145.8, 139.3, 138.4, 138.1, 133.7, 133.5, 133.0, 130.8, 130.2, 129.4, 129.1, 128.9, 128.4, 127.5, 123.5, 118.0, 117.6, 117.1.

**IR** (KBr)  $\tilde{\nu}$  (cm<sup>-1</sup>): 2914, 2848, 1735, 1682, 1596, 1342, 1285, 1008, 890, 750.

**HRMS** (ESI)  $m/z$ :  $[M+H]^+$  Calcd for  $C_{30}H_{20}N_3O_4$  486.1454; found: 486.1454

***N*-(3-(4-Methoxyphenyl)-4-oxo-2-phenylindeno[1,2-*b*]pyrrol-1(4*H*)-yl)benzamide (6da)**

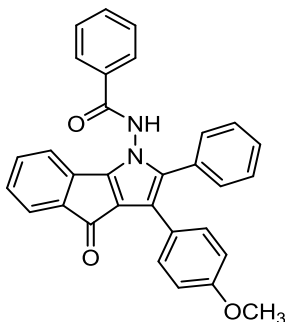

Following the TP-3, **6da** was obtained from **3d** (175.5 mg, 0.3 mmol), benzoyl chloride **5a** (38.3  $\mu$ L, 1.1 equiv) and triethylamine (63  $\mu$ L, 1.5 equiv). The residue was purified by column chromatography (SiO<sub>2</sub>, Hexanes/EtOAc= 88:12) to give as an orange solid (90.3 mg, 64% yield).



$R_f$  = 0.60 (EtOAc:Hexanes = 1:2); mp = 157.6-160.0 °C.

**$^1\text{H NMR}$**  (400 MHz, DMSO- $d_6$ , 25 °C)  $\delta$ /ppm: 12.11 (brs, 1H), 7.79 (d,  $J$  = 8.3 Hz, 2H), 7.64 (t,  $J$  = 7.2 Hz, 1H), 7.54 (pt,  $J$  = 7.6 Hz, 2H), 7.42 – 7.34 (m, 4H), 7.34 – 7.26 (m, 5H), 7.19 (t,  $J$  = 7.3 Hz, 1H), 7.06 (d,  $J$  = 7.9 Hz, 2H), 6.90 (d,  $J$  = 7.3 Hz, 1H), 2.26 (s, 3H).

**$^{13}\text{C NMR}$**  (100 MHz, DMSO- $d_6$ , 25 °C)  $\delta$ /ppm: 185.0, 166.1, 150.3, 138.5, 136.18, 136.11, 133.8, 133.3, 132.7, 130.3, 129.4, 128.8, 128.7, 128.5, 128.3, 127.5, 123.1, 119.2, 118.0, 117.2, 20.7.

**IR** (KBr)  $\tilde{\nu}$  ( $\text{cm}^{-1}$ ): 3314, 2914, 2848, 1734, 1665, 1471, 1178, 880, 750.

**HRMS** (ESI)  $m/z$ :  $[\text{M}+\text{H}]^+$  Calcd for  $\text{C}_{31}\text{H}_{23}\text{N}_2\text{O}_3$  471.1709; found: 471.1707.

***N*-(4-Oxo-2,3-diphenylindeno[1,2-*b*]pyrrol-1(4*H*)-yl)benzamide (6ea)**

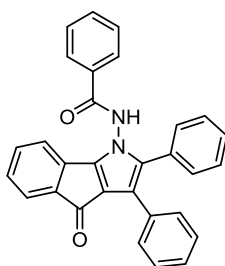

Following the TP-3, **6ea** was obtained from **3e** (166.2 mg, 0.3 mmol), benzoyl chloride **5a** (38.3  $\mu\text{L}$ , 1.1 equiv) and triethylamine (63  $\mu\text{L}$ , 1.5 equiv). The residue was purified by column chromatography ( $\text{SiO}_2$ , Hexanes/EtOAc = 85:15) to give as an orange solid (71.4 mg, 54% yield).

$R_f$  = 0.53 (EtOAc:Hexanes = 1:2); mp = 268.2-268.6 °C.

**$^1\text{H NMR}$**  (400 MHz, DMSO- $d_6$ , 25 °C)  $\delta$ /ppm: 12.12 (s, 1H), 7.79 (d,  $J$  = 7.6 Hz, 2H), 7.65 (t,  $J$  = 7.5 Hz, 1H), 7.55 (t,  $J$  = 7.4 Hz, 2H), 7.42 (t,  $J$  = 1.7 Hz, 1H), 7.41-7.36 (m, 5H), 7.36-7.30 (m, 3H), 7.26 (tt,  $J$  = 7.5, 1.6 Hz, 2H), 7.20 (t,  $J$  = 7.7 Hz, 2H), 6.92 (d,  $J$  = 7.2 Hz, 1H).

**$^{13}\text{C NMR}$**  (100 MHz, DMSO- $d_6$ , 25 °C)  $\delta$ /ppm: 185.0, 166.0, 150.5, 138.4, 136.5, 133.8, 133.4, 132.8, 132.2, 130.9, 130.3, 129.2, 128.9, 128.8, 128.64, 128.57, 128.3, 128.1, 127.5, 126.9, 123.2, 119.2, 118.0, 117.2.

**IR** (KBr)  $\tilde{\nu}$  ( $\text{cm}^{-1}$ ): 3340, 2914, 1734, 1699, 1660, 1469, 1053, 890, 740.

**HRMS** (ESI)  $m/z$ :  $[\text{M}+\text{H}]^+$  Calcd for  $\text{C}_{30}\text{H}_{21}\text{N}_2\text{O}_2$  441.1603; found: 441.1600.

***N*-(3-(3-Chlorophenyl)-4-oxo-2-phenylindeno[1,2-*b*]pyrrol-1(4*H*)-yl)benzamide (6fa)**

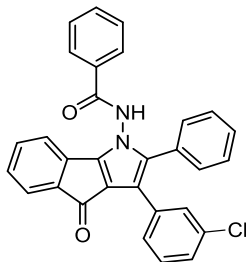

Following the TP-3, **6fa** was obtained from **3f** (176.7 mg, 0.3 mmol), benzoyl chloride **5a** (38.3  $\mu\text{L}$ , 1.1 equiv) and triethylamine (63  $\mu\text{L}$ , 1.5 equiv). The residue was purified by column chromatography (SiO<sub>2</sub>, Hexanes/EtOAc= 90:10) to give as an orange solid (67.0 mg, 47% yield).  $R_f$ = 0.56 (EtOAc:Hexanes =2:8); mp = 125.9-126.5 °C.

**<sup>1</sup>H NMR** (400 MHz, DMSO-*d*<sub>6</sub>, 25 °C)  $\delta$ /ppm: 12.16 (s, 1H), 7.79 (dd,  $J$  = 8.1, 1.6 Hz, 2H), 7.65 (tt,  $J$  = 7.6, 1.5 Hz, 1H), 7.56 (d,  $J$  = 7.9 Hz, 1H), 7.52 (t,  $J$  = 1.4 Hz, 2H), 7.42 (td,  $J$  = 6.8, 2.0 Hz, 4H), 7.38 – 7.32 (m, 3H), 7.31 – 7.25 (m, 3H), 7.23 (t,  $J$  = 7.8 Hz, 1H), 6.94 (d,  $J$  = 7.3 Hz, 1H).

**<sup>13</sup>C NMR** (100 MHz, DMSO-*d*<sub>6</sub>, 25 °C)  $\delta$ /ppm: 185.0, 166.0, 150.7, 138.2, 137.2, 134.4, 133.6, 133.5, 132.9, 130.8, 130.3, 129.9, 129.2, 128.9, 128.84, 128.77, 127.9, 127.5, 126.7, 126.6, 123.4, 117.8, 117.6, 117.4.

**IR** (KBr)  $\tilde{\nu}$  (cm<sup>-1</sup>): 3230, 2914, 2848, 1720, 1701, 1665, 1598, 1465, 1280, 1050, 850, 760.

**HRMS** (ESI)  $m/z$ : [M+H]<sup>+</sup> Calcd for C<sub>30</sub>H<sub>20</sub><sup>35</sup>ClN<sub>2</sub>O<sub>2</sub> 475.1213; found: 475.1210; [M+H]<sup>+</sup> Calcd for C<sub>30</sub>H<sub>20</sub><sup>37</sup>ClN<sub>2</sub>O<sub>2</sub> 477.1184; found: 477.1197.

***N*-(3-(4-Bromophenyl)-4-oxo-2-phenylindeno[1,2-*b*]pyrrol-1(4*H*)-yl)-4-chlorobenzamide (6ia)**

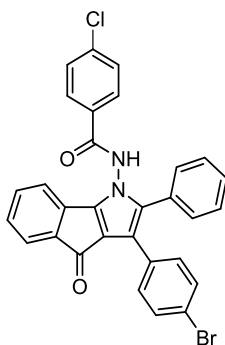

Following the TP-3, **6ia** was obtained from **3i** (200.4 mg, 0.3 mmol), benzoyl chloride **5a** (38.3  $\mu\text{L}$ , 1.1 equiv) and triethylamine (63  $\mu\text{L}$ , 1.5 equiv). The residue was purified by column chromatography (SiO<sub>2</sub>, Hexanes/EtOAc= 85:15) to give as an orange solid (137.9 mg, 83% yield).  $R_f$ = 0.55 (EtOAc:Hexanes =1:2); mp = 173.2-173.8 °C.

**<sup>1</sup>H NMR** (400 MHz, CDCl<sub>3</sub>, 25 °C) δ/ppm: 9.83 (brs, 1H), 7.54 (d, *J* = 8.2 Hz, 2H), 7.28 (d, *J* = 8.5 Hz, 3H), 7.21 (t, *J* = 7.6 Hz, 2H), 7.17 – 7.11 (m, 6H), 7.07 (d, *J* = 7.0 Hz, 1H), 6.92 (t, *J* = 7.6 Hz, 1H), 6.85 (t, *J* = 7.4 Hz, 1H), 6.54 (d, *J* = 7.1 Hz, 1H).

**<sup>13</sup>C NMR** (100 MHz, CDCl<sub>3</sub>, 25 °C) δ/ppm: 186.6, 165.8, 151.4, 139.6, 138.8, 136.4, 133.8, 132.8, 131.0, 130.4, 130.2, 129.3, 129.1, 128.96, 128.85, 128.79, 128.4, 123.4, 120.8, 119.4, 119.0, 117.0,

**IR** (KBr)  $\tilde{\nu}$  (cm<sup>-1</sup>): 3239, 2918, 1735, 1704, 1612, 1493, 1298, 1080, 860, 755.

**HRMS** (ESI) *m/z*: [M+H]<sup>+</sup> Calcd for C<sub>30</sub>H<sub>19</sub><sup>79</sup>Br<sup>35</sup>ClN<sub>2</sub>O<sub>2</sub> 553.0318; found: 553.0316; [M+H]<sup>+</sup> Calcd for C<sub>30</sub>H<sub>19</sub><sup>81</sup>Br<sup>35</sup>ClN<sub>2</sub>O<sub>2</sub> 555.0298; found: 555.0297; [M+H]<sup>+</sup> Calcd for C<sub>30</sub>H<sub>19</sub><sup>79</sup>Br<sup>37</sup>ClN<sub>2</sub>O<sub>2</sub> 555.0298; found: 555.0297; [M+H]<sup>+</sup> Calcd for C<sub>30</sub>H<sub>19</sub><sup>81</sup>Br<sup>37</sup>ClN<sub>2</sub>O<sub>2</sub> 557.02680; found: 557.0282.

***N*-(3-(4-Bromophenyl)-4-oxo-2-phenylindeno[1,2-*b*]pyrrol-1(4*H*)-yl)-4-methylbenzamide (6ja)**

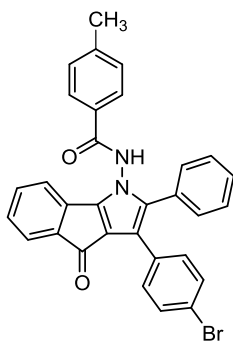

Following the TP-3, **6ja** was obtained from **3j** (194.1 mg, 0.3 mmol), benzoyl chloride **5a** (38.3 μL, 1.1 equiv) and triethylamine (63 μL, 1.5 equiv). The residue was purified by column chromatography (SiO<sub>2</sub>, Hexanes/EtOAc= 85:15) to give as an orange solid (126.4 mg, 79% yield). *R*<sub>f</sub>= 0.55 (EtOAc:Hexanes = 1:2); mp = 161.2-161.5 °C.

**<sup>1</sup>H NMR** (400 MHz, DMSO-*d*<sub>6</sub>, 25 °C) δ/ppm: 9.3 (brs, 1H), 7.53 (d, *J* = 7.9 Hz, 2H), 7.28 (d, *J* = 7.2 Hz, 1H), 7.25 – 7.22 (m, 5H), 7.20 (pt, *J* = 7.4 Hz, 4H), 7.14 (d, *J* = 7.8 Hz, 2H), 6.96 (pt, *J* = 7.4 Hz, 1H), 6.92 (t, *J* = 7.3 Hz, 1H), 6.62 (d, *J* = 6.8 Hz, 1H), 2.35 (s, 3H).

**<sup>13</sup>C NMR** (100 MHz, CDCl<sub>3</sub>, 25 °C) δ/ppm: 186.3, 166.7, 151.4, 144.0, 139.0, 136.4, 134.0, 132.7, 131.3, 131.0, 130.5, 130.3, 129.6, 129.1, 128.9, 128.8, 128.3, 127.7, 127.4, 123.3, 120.7, 119.3, 119.0, 117.0, 21.5.

**IR** (KBr)  $\tilde{\nu}$  (cm<sup>-1</sup>): 3248, 2918, 2848, 1735, 1699, 1635, 1498, 1274, 865, 750.

**HRMS** (ESI) *m/z*: [M+H]<sup>+</sup> Calcd for C<sub>31</sub>H<sub>22</sub><sup>79</sup>BrN<sub>2</sub>O<sub>2</sub> 533.0865; found: 533.0861; [M+H]<sup>+</sup> Calcd for C<sub>31</sub>H<sub>22</sub><sup>81</sup>BrN<sub>2</sub>O<sub>2</sub> 535.0844; found: 535.0839.

***N*-(2,3-Bis(4-bromophenyl)-4-oxoindeno[1,2-*b*]pyrrol-1(4*H*)-yl)benzamide (6ab)**

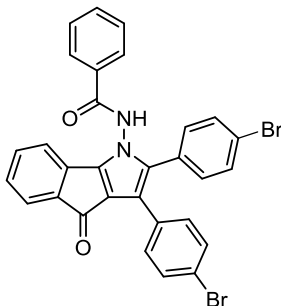

Following the TP-3, **6ab** was obtained from **3a** (190.2 mg, 0.3 mmol), 4-bromo benzoyl chloride **5b** (72.4 mg, 1.1 equiv) and triethylamine (63  $\mu$ L, 1.5 equiv). The residue was purified by column chromatography (SiO<sub>2</sub>, Hexanes/EtOAc= 88:12) to give as an orange solid (149.0 mg, 83% yield).  $R_f$ = 0.60 (EtOAc:Hexanes =1:2); mp = 251.0-251.4 °C.

**<sup>1</sup>H NMR** (400 MHz, DMSO-d<sub>6</sub>, 25 °C)  $\delta$ /ppm: 12.20 (s, 1H), 7.85 (d,  $J$  = 7.6 Hz, 2H), 7.67 (t,  $J$  = 7.2 Hz, 1H), 7.61 (d,  $J$  = 8.4 Hz, 2H), 7.57 (t,  $J$  = 7.8 Hz, 2H), 7.50 (d,  $J$  = 8.6 Hz, 2H), 7.40 (d,  $J$  = 7.2 Hz, 1H), 7.38-7.31 (m, 3H), 7.28 (d,  $J$  = 8.4 Hz, 2H), 7.21 (t,  $J$  = 7.5 Hz, 1H), 6.96 (d,  $J$  = 7.3 Hz, 1H).

**<sup>13</sup>C NMR** (100 MHz, DMSO-d<sub>6</sub>, 25 °C)  $\delta$ /ppm: 184.9, 166.1, 150.8, 138.3, 135.4, 133.6, 133.5, 133.0, 132.2, 131.8, 131.2, 130.7, 130.4, 129.0, 128.9, 128.0, 127.5, 123.3, 122.5, 120.3, 118.3, 118.0, 117.4.

**IR** (KBr)  $\tilde{\nu}$  (cm<sup>-1</sup>): 3235, 2923, 1725, 1697, 1660, 1493, 1278, 1075, 865, 755.

**HRMS** (ESI)  $m/z$ : [M+H]<sup>+</sup> Calcd for C<sub>30</sub>H<sub>19</sub><sup>79</sup>Br<sub>2</sub>N<sub>2</sub>O<sub>2</sub> 596.9813; found: 596.9812; [M+H]<sup>+</sup> Calcd for C<sub>30</sub>H<sub>19</sub><sup>79</sup>Br<sup>81</sup>BrN<sub>2</sub>O<sub>2</sub> 598.9793; found: 598.9794; [M+H]<sup>+</sup> Calcd for C<sub>30</sub>H<sub>19</sub><sup>81</sup>Br<sub>2</sub>N<sub>2</sub>O<sub>2</sub> 600.9772; found: 600.9780.

***N*-(3-(4-Bromophenyl)-2-(4-chlorophenyl)-4-oxoindeno[1,2-*b*]pyrrol-1(4*H*)-yl)benzamide (6ac)**

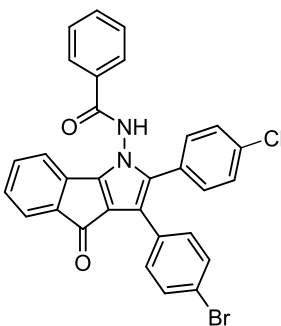

Following the TP-3, **6ac** was obtained from **3a** (190.2 mg, 0.3 mmol), 4-chloro benzoyl chloride **5c** (42.3  $\mu$ L, 1.1 equiv) and triethylamine (63  $\mu$ L, 1.5 equiv). The residue was purified by column

chromatography (SiO<sub>2</sub>, Hexanes/EtOAc= 85:15) to give as an orange solid (137.9 mg, 83% yield).  $R_f$ = 0.55 (EtOAc:Hexanes =1:2); mp = 151.4-151.8 °C.

<sup>1</sup>H NMR (400 MHz, DMSO-d<sub>6</sub>, 25 °C) δ/ppm: 12.21 (s, 1H), 7.82 (d,  $J$  = 7.6 Hz, 2H), 7.67 (t,  $J$  = 7.2 Hz, 1H), 7.57 (t,  $J$  = 7.8 Hz, 2H), 7.51 (t,  $J$  = 1.8 Hz, 1H), 7.49 (t,  $J$  = 2.2 Hz, 2H), 7.47 (t,  $J$  = 2.2 Hz, 1H), 7.40 (d,  $J$  = 7.1 Hz, 1H), 7.37-7.30 (m, 5H), 7.22 (t,  $J$  = 7.5 Hz, 1H), 6.94 (d,  $J$  = 7.1 Hz, 1H).

<sup>13</sup>C NMR (100 MHz, DMSO-d<sub>6</sub>, 25 °C) δ/ppm: 184.9, 166.1, 150.8, 138.3, 135.4, 133.8, 133.6, 133.0, 132.0, 131.3, 130.4, 129.01, 128.95, 127.68, 127.56, 123.4, 120.3, 118.4, 118.0, 117.5.

IR (KBr)  $\tilde{\nu}$  (cm<sup>-1</sup>): 3428, 2923, 1760, 1699, 1640, 1493, 1276, 1092, 888, 756.

HRMS (ESI)  $m/z$ : [M+H]<sup>+</sup> Calcd for C<sub>30</sub>H<sub>19</sub><sup>79</sup>Br<sup>35</sup>ClN<sub>2</sub>O<sub>2</sub> 553.0318; found: 553.0320; [M+H]<sup>+</sup> Calcd for C<sub>30</sub>H<sub>19</sub><sup>79</sup>Br<sup>37</sup>ClN<sub>2</sub>O<sub>2</sub> 555.0298; found: 555.0301; [M+H]<sup>+</sup> Calcd for C<sub>30</sub>H<sub>19</sub><sup>81</sup>Br<sup>35</sup>ClN<sub>2</sub>O<sub>2</sub> 555.0298; found: 555.0301; [M+H]<sup>+</sup> Calcd for C<sub>30</sub>H<sub>19</sub><sup>81</sup>Br<sup>37</sup>ClN<sub>2</sub>O<sub>2</sub> 557.0268; found: 557.0283.

**General procedure for the preparation of indenopyrrole derivative 6ac from spiro-indene-1,2'-[1,3,4]oxadiazol 8ac:**

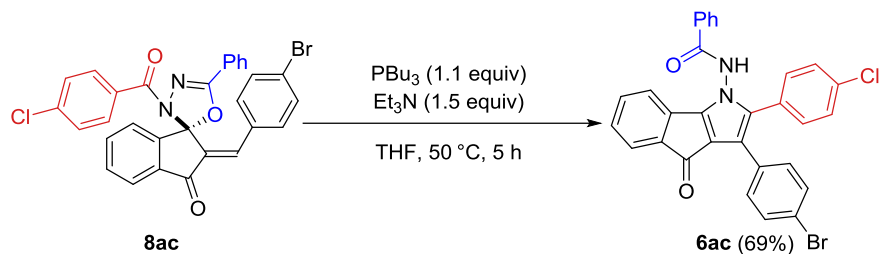

A dry and argon-flushed 10 mL Schlenk flask equipped with a magnetic stir bar and septum was sequentially charged with **8ac** (114.0 mg, 0.2 mmol), anhydrous THF (2 mL), PBU<sub>3</sub> (54.3 μL, 1.1 equiv) and Et<sub>3</sub>N (40.0 μL, 1.5 equiv). The reaction mixture was stirred for 5 h at 50 °C. After completion of the reaction, solvent was removed in *vacuo* and the crude residue was subjected to flash column chromatography (SiO<sub>2</sub>, Hexanes/EtOAc= 85:15) to give the product **6ac** in 69% yield (76.5 mg).

***N*-(3-(4-Bromophenyl)-2-(4-fluorophenyl)-4-oxoindeno[1,2-*b*]pyrrol-1(4*H*)-yl)benzamide (6ad)**

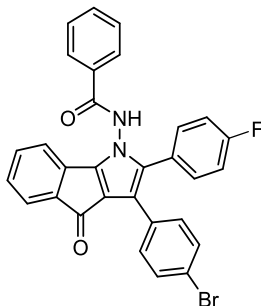

Following the TP-3, **6ad** was obtained from **3a** (190.2 mg, 0.3 mmol), 4-fluoro benzoyl chloride **5d** (39  $\mu$ L, 1.1 equiv) and triethylamine (63  $\mu$ L, 1.5 equiv). The residue was purified by column chromatography (SiO<sub>2</sub>, Hexanes/EtOAc= 85:15) to give as an orange solid (130.6 mg, 81% yield).  $R_f$ = 0.52 (EtOAc:Hexanes =1:2); mp = 138.8-139.2 °C.

**<sup>1</sup>H NMR** (400 MHz, CDCl<sub>3</sub>, 25 °C)  $\delta$ /ppm: 9.22 (brs, 1H), 7.69 (d,  $J$  = 7.7 Hz, 2H), 7.59 (t,  $J$  = 7.6 Hz, 1H), 7.44 (t,  $J$  = 7.6 Hz, 2H), 7.29-7.14 (m, 7H), 7.02 (t,  $J$  = 7.68 Hz, 1H), 6.96 (q,  $J$  = 8.6 Hz, 3H), 6.67 (d,  $J$  = 7.0 Hz, 1H).

**<sup>13</sup>C NMR** (100 MHz, CDCl<sub>3</sub>, 25 °C)  $\delta$ /ppm: 186.2, 166.5, 163.0 (d,  $^1J_{C-F}$  = 250.3 Hz), 151.4, 139.0, 135.2, 134.0, 133.3, 132.8, 132.54 (d,  $^3J_{C-F}$  = 8.5 Hz), 131.2, 131.0, 130.6, 130.3, 129.2, 128.5, 127.3, 125.20 (d,  $^4J_{C-F}$  = 3.0 Hz), 123.5, 121.0, 119.7, 119.2, 117.1, 116.15 (d,  $^2J_{C-F}$  = 21.6 Hz).

**<sup>19</sup>F NMR** (376 MHz, CDCl<sub>3</sub>, 25 °C)  $\delta$ /ppm: -115.31.

**IR** (KBr)  $\tilde{\nu}$  (cm<sup>-1</sup>): 3243, 2923, 1735, 1689, 1511, 1267, 1158, 852, 760.

**HRMS** (ESI)  $m/z$ : [M+H]<sup>+</sup> Calcd for C<sub>30</sub>H<sub>19</sub><sup>79</sup>BrFN<sub>2</sub>O<sub>2</sub> 537.0614; found: 537.0615; [M+H]<sup>+</sup> Calcd for C<sub>30</sub>H<sub>19</sub><sup>81</sup>BrFN<sub>2</sub>O<sub>2</sub> 539.0593; found: 539.0598.

***N*-(3-(4-Bromophenyl)-4-oxo-2-(*p*-tolyl)indeno[1,2-*b*]pyrrol-1(4*H*)-yl)benzamide (6ae)**

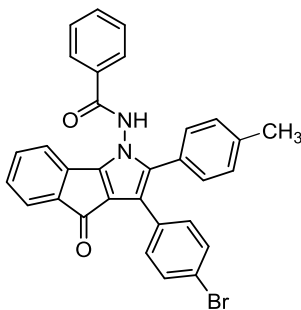

Following the TP-3, **6ae** was obtained from **3a** (190.2 mg, 0.3 mmol), 4-methyl benzoyl chloride **5e** (43.6  $\mu$ L, 1.1 equiv) and triethylamine (63  $\mu$ L, 1.5 equiv). The residue was purified by column chromatography (SiO<sub>2</sub>, Hexanes/EtOAc= 85:15) to give as an orange solid (136.0 mg, 85% yield).  $R_f$ = 0.54 (EtOAc:Hexanes =1:2); mp = 255.6-255.9 °C.

**<sup>1</sup>H NMR** (400 MHz, CDCl<sub>3</sub>, 25 °C) δ/ppm: 9.54 (s, 1H), 7.65 (d, *J* = 7.80 Hz, 2H), 7.52 (t, *J* = 7.2 Hz, 1H), 7.35 (t, *J* = 7.7 Hz, 2H), 7.25-7.16 (m, 4H), 7.13 (d, *J* = 7.1 Hz, 1H), 7.06 (d, *J* = 8.0 Hz, 2H), 7.00 (d, *J* = 8.0 Hz, 2H), 6.94 (t, *J* = 7.7 Hz, 1H), 6.88 (t, *J* = 7.4 Hz, 1H), 6.60 (d, *J* = 7.0 Hz, 1H), 2.28 (s, 3H).

**<sup>13</sup>C NMR** (100 MHz, CDCl<sub>3</sub>, 25 °C) δ/ppm: 186.4, 166.7, 151.3, 139.0, 136.5, 134.0, 133.1, 132.7, 131.4, 131.0, 130.7, 130.3, 129.6, 129.0, 128.2, 127.4, 126.0, 123.3, 120.6, 119.2, 119.1, 117.0, 21.3.

**IR** (KBr)  $\tilde{\nu}$  (cm<sup>-1</sup>): 3235, 2918, 2360, 1739, 1699, 1665, 1493, 1278, 865, 750.

**HRMS** (ESI) *m/z*: [M+H]<sup>+</sup> Calcd for C<sub>31</sub>H<sub>22</sub><sup>79</sup>BrN<sub>2</sub>O<sub>2</sub> 533.0865; found: 533.0870; [M+H]<sup>+</sup> Calcd for C<sub>31</sub>H<sub>22</sub><sup>81</sup>BrN<sub>2</sub>O<sub>2</sub> 535.0844; found: 535.0856.

***N*-(3-(4-Bromophenyl)-2-(3-chlorophenyl)-4-oxoindeno[1,2-*b*]pyrrol-1(4*H*)-yl)benzamide (6af)**

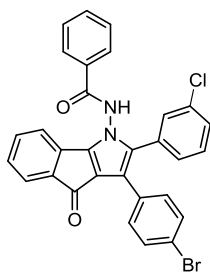

Following the TP-3, **6af** was obtained from **3a** (190.2 mg, 0.3 mmol), 3-chloro benzoyl chloride **5f** (42.2 μL, 1.1 equiv) and triethylamine (63 μL, 1.5 equiv). The residue was purified by column chromatography (SiO<sub>2</sub>, Hexanes/EtOAc= 85:15) to give as an orange solid (141.2 mg, 85% yield). *R<sub>f</sub>* = 0.55 (EtOAc:Hexanes = 1:2); mp = 234.2-234.6 °C.

**<sup>1</sup>H NMR** (400 MHz, CDCl<sub>3</sub>, 25 °C) δ/ppm: 8.77 (brs, 1H), 7.73 (d, *J* = 7.6 Hz, 2H), 7.62 (t, *J* = 7.8 Hz, 1H), 7.49 (t, *J* = 7.6 Hz, 2H), 7.36 (d, *J* = 6.9 Hz, 1H), 7.35 – 7.29 (m, 6H), 7.23 (d, *J* = 8.6 Hz, 1H), 7.15 (d, *J* = 7.8 Hz, 1H), 7.11 (d, *J* = 7.1 Hz, 1H), 7.07 (pt, *J* = 7.3 Hz, 1H), 6.79 (d, *J* = 7.1 Hz, 1H).

**<sup>13</sup>C NMR** (100 MHz, DMSO-*d*<sub>6</sub>, 25 °C) δ/ppm: 184.9, 166.2, 150.9, 138.3, 134.9, 133.55, 133.50, 133.2, 133.0, 131.2, 131.1, 130.80, 130.76, 130.6, 130.4, 129.7, 129.0, 128.94, 128.88, 127.5, 123.4, 120.4, 118.5, 117.9, 117.5.

**IR** (KBr)  $\tilde{\nu}$  (cm<sup>-1</sup>): 3428, 2918, 2848, 1735, 1638, 1490, 1273, 865, 745.

**HRMS** (ESI) *m/z*: [M+H]<sup>+</sup> Calcd for C<sub>30</sub>H<sub>19</sub><sup>79</sup>Br<sup>35</sup>ClN<sub>2</sub>O<sub>2</sub> 553.0318; found: 553.0316; [M+H]<sup>+</sup> Calcd for C<sub>30</sub>H<sub>19</sub><sup>79</sup>Br<sup>37</sup>ClN<sub>2</sub>O<sub>2</sub> 555.0298; found: 555.0298; [M+H]<sup>+</sup> Calcd for C<sub>30</sub>H<sub>19</sub><sup>81</sup>Br<sup>35</sup>ClN<sub>2</sub>O<sub>2</sub>

555.0298; found: 555.0301;  $[M+H]^+$  Calcd for  $C_{30}H_{19}^{81}Br^{37}ClN_2O_2$  557.0268; found: 557.0282.

***N*-(3-(4-Bromophenyl)-4-oxo-2-(*m*-tolyl)indeno[1,2-*b*]pyrrol-1(4*H*)-yl)benzamide (6ag)**

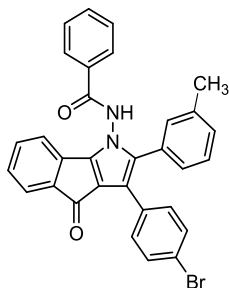

Following the TP-3, **6ag** was obtained from **3a** (190.2 mg, 0.3 mmol), 3-methyl benzoyl chloride **5g** (43.6  $\mu$ L, 1.1 equiv) and triethylamine (63  $\mu$ L, 1.5 equiv). The residue was purified by column chromatography (SiO<sub>2</sub>, Hexanes/EtOAc= 85:15) to give as an orange solid (128.0 mg, 80% yield).  $R_f$ = 0.53 (EtOAc:Hexanes =1:2); mp = 151.1-151.5 °C.

**<sup>1</sup>H NMR** (400 MHz, DMSO-*d*<sub>6</sub>, 25 °C)  $\delta$ /ppm: 12.11 (brs, 1H), 7.79 (dd,  $J$  = 7.9, 1.7 Hz, 2H), 7.65 (tt,  $J$  = 7.2, 1.7 Hz, 1H), 7.55 (t,  $J$  = 7.9 Hz, 2H), 7.47 (dt,  $J$  = 8.7, 2.2 Hz, 2H), 7.39 (d,  $J$  = 7.6 Hz, 1H), 7.36 (dt,  $J$  = 8.5, 2.0 Hz, 2H), 7.31 (d,  $J$  = 7.5 Hz, 1H), 7.28 (t,  $J$  = 7.7 Hz, 1H), 7.21 (pt,  $J$  = 7.3 Hz, 2H), 7.19 – 7.16 (m, 1H), 7.09 (d,  $J$  = 7.7 Hz, 1H), 6.93 (d,  $J$  = 7.3 Hz, 1H), 2.23 (s, 3H).

**<sup>13</sup>C NMR** (100 MHz, DMSO-*d*<sub>6</sub>, 25 °C)  $\delta$ /ppm: 185.0, 166.2, 150.7, 138.3, 137.9, 136.8, 133.7, 133.5, 132.8, 131.6, 131.1, 130.5, 130.3, 129.6, 128.89, 128.75, 128.63, 127.5, 127.4, 123.3, 120.0, 117.8, 117.3, 20.9.

**IR** (KBr)  $\tilde{\nu}$  (cm<sup>-1</sup>): 3428, 2918, 1721, 1642, 1490, 1372, 1076, 896, 754.

**HRMS** (ESI)  $m/z$ :  $[M+H]^+$  Calcd for  $C_{31}H_{22}^{79}BrN_2O_2$  533.0865; found: 533.0861;  $[M+H]^+$  Calcd for  $C_{31}H_{22}^{81}BrN_2O_2$  535.0844; found: 535.0844.

***N*-(3-(4-Bromophenyl)-2-(3-methoxyphenyl)-4-oxoindeno[1,2-*b*]pyrrol-1(4*H*)-yl)benzamide (6ah)**

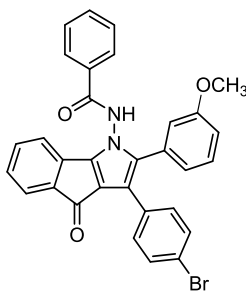

Following the TP-3, **6ah** was obtained from **6a** (190.2 mg, 0.3 mmol), 3-methoxy benzoyl chloride



**5h** (46.4  $\mu$ L, 1.1 equiv) and triethylamine (63  $\mu$ L, 1.5 equiv). The residue was purified by column chromatography (SiO<sub>2</sub>, Hexanes/EtOAc= 85:15) to give as a yellow solid (110.4 mg, 67% yield).  $R_f$ = 0.48 (EtOAc:Hexanes =1:2); mp = 248.3-248.7 °C.

**<sup>1</sup>H NMR** (400 MHz, DMSO-d<sub>6</sub>, 25 °C)  $\delta$ /ppm: 8.93 (brs, 1H), 7.70 (d,  $J$  = 7.6 Hz, 2H), 7.59 (t,  $J$  = 7.6 Hz, 1H), 7.44 (t,  $J$  = 7.8 Hz, 2H), 7.36 – 7.30 (m, 3H), 7.30 – 7.27 (m, 2H), 7.21 (t,  $J$  = 8.5 Hz, 1H), 7.08 (t,  $J$  = 7.5 Hz, 1H), 7.02 (t,  $J$  = 7.4 Hz, 1H), 6.87 (dd,  $J$  = 8.8, 2.1 Hz, 1H), 6.84 (d,  $J$  = 7.3 Hz, 2H), 6.74 (d,  $J$  = 7.0 Hz, 1H), 3.63 (s, 3H).

**<sup>13</sup>C NMR** (100 MHz, DMSO-d<sub>6</sub>, 25 °C)  $\delta$ /ppm: 186.1, 166.5, 159.9, 151.4, 139.1, 135.9, 134.1, 133.2, 132.8, 131.3, 131.2, 130.8, 130.4, 130.1, 129.2, 128.5, 127.3, 123.6, 122.8, 120.9, 119.6, 119.3, 117.1, 115.5, 115.3, 55.2.

**IR** (KBr)  $\tilde{\nu}$  (cm<sup>-1</sup>): 3428, 2918, 2852, 2334, 1750, 1644, 1215, 1008, 867, 753.

**HRMS** (ESI)  $m/z$ : [M+H]<sup>+</sup> Calcd for C<sub>31</sub>H<sub>22</sub><sup>79</sup>BrN<sub>2</sub>O<sub>3</sub> 549.0814; found: 549.0811; [M+H]<sup>+</sup> Calcd for C<sub>31</sub>H<sub>22</sub><sup>81</sup>BrN<sub>2</sub>O<sub>3</sub> 551.0793; found: 551.0796.

***N*-(3-(4-Bromophenyl)-2-(2-chlorophenyl)-4-oxoindeno[1,2-*b*]pyrrol-1(4*H*)-yl)benzamide (6ai)**

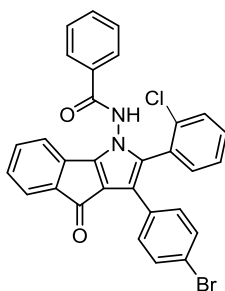

Following the TP-3, **6ai** was obtained from **3a** (190.2 mg, 0.3 mmol), 2-chloro benzoyl chloride **5i** (41.8  $\mu$ L, 1.1 equiv) and triethylamine (63  $\mu$ L, 1.5 equiv). The residue was purified by column chromatography (SiO<sub>2</sub>, Hexanes/EtOAc= 86:14) to give as an orange solid (124.6 mg, 75% yield).  $R_f$ = 0.55 (EtOAc:Hexanes =1:2); mp = 170.3-170.7 °C.

**<sup>1</sup>H NMR** (400 MHz, DMSO-d<sub>6</sub>, 25 °C)  $\delta$ /ppm: 9.15 (s, 1H), 7.61 (d,  $J$  = 7.7 Hz, 2H), 7.53 (t,  $J$  = 7.5 Hz, 1H), 7.47 (d,  $J$  = 8.0 Hz, 1H), 7.38 (t,  $J$  = 7.5 Hz, 2H), 7.35-7.26 (m, 7H), 7.18 (t,  $J$  = 7.6 Hz, 1H), 7.13 - 6.97 (m, 2H), 6.80 (d,  $J$  = 6.2 Hz, 1H).

**<sup>13</sup>C NMR** (100 MHz, DMSO-d<sub>6</sub>, 25 °C)  $\delta$ /ppm: 186.0, 166.2, 151.6, 139.0, 134.0, 133.1, 132.7, 131.3, 131.1, 130.1, 130.5, 129.9, 129.0, 128.8, 128.6, 127.8, 127.2, 123.6, 121.0, 120.8, 119.2, 117.3.

**IR** (KBr)  $\tilde{\nu}$  (cm<sup>-1</sup>): 3239, 2918, 1754, 1699, 1665, 1491, 1276, 1213, 852, 743.

**HRMS** (ESI)  $m/z$ : [M+H]<sup>+</sup> Calcd for C<sub>30</sub>H<sub>19</sub><sup>79</sup>Br<sup>35</sup>ClN<sub>2</sub>O<sub>2</sub> 553.0318; found: 553.0319; [M+H]<sup>+</sup> Calcd for C<sub>30</sub>H<sub>19</sub><sup>79</sup>Br<sup>37</sup>ClN<sub>2</sub>O<sub>2</sub> 555.0298; found: 555.0301; [M+H]<sup>+</sup> Calcd for C<sub>30</sub>H<sub>19</sub><sup>81</sup>Br<sup>35</sup>ClN<sub>2</sub>O<sub>2</sub> 555.0298; found: 555.0301; [M+H]<sup>+</sup> Calcd for C<sub>30</sub>H<sub>19</sub><sup>81</sup>Br<sup>37</sup>ClN<sub>2</sub>O<sub>2</sub> 557.0268; found: 557.0285.

**General procedure for the preparation of indenopyrrole derivative 6ai from spiro-indene-1,2'-[1,3,4]oxadiazol 8ai:**

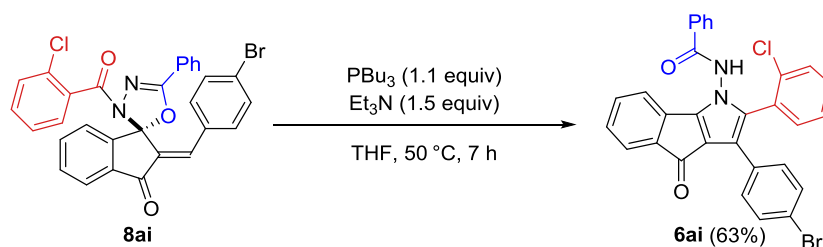

A dry and argon-flushed 10 mL Schlenk flask equipped with a magnetic stir bar and septum was sequentially charged with **8ai** (114.0 mg, 0.2 mmol), anhydrous THF (2 mL), PBU<sub>3</sub> (54.3  $\mu$ L, 1.1 equiv) and Et<sub>3</sub>N (40.0  $\mu$ L, 1.5 equiv). The reaction mixture was stirred for 7 h at 50 °C. After completion of the reaction, solvent was removed in *vacuo* and the crude residue was subjected to flash column chromatography (SiO<sub>2</sub>, Hexanes/EtOAc= 86:14) to give the product **6ai** in 63% yield (69.8 mg).

***N*-(3-(4-Bromophenyl)-2-(furan-2-yl)-4-oxoindeno[1,2-*b*]pyrrol-1(4*H*)-yl)benzamide (6aj)**

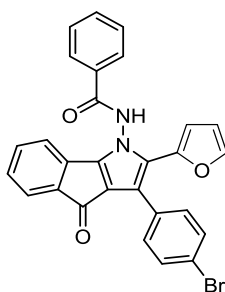

Following the TP-3, **6aj** was obtained from **3a** (190.2 mg, 0.3 mmol), 2-furoyl chloride **5j** (32.6  $\mu$ L, 1.5 equiv) and triethylamine (63  $\mu$ L, 1.5 equiv). The residue was purified by column chromatography (SiO<sub>2</sub>, Hexanes/EtOAc= 85:15) to give as an orange solid (110.0 mg, 72% yield).  $R_f$ = 0.50 (EtOAc:Hexanes =1:2); mp = 230.1-230.5 °C.

**<sup>1</sup>H NMR** (400 MHz, CDCl<sub>3</sub>, 25 °C)  $\delta$ /ppm: 9.26 (s, 1H), 7.69 (d,  $J$  = 7.2 Hz, 2H), 7.58 (t,  $J$  = 7.6 Hz, 1H), 7.40 (t,  $J$  = 7.6 Hz, 2H), 7.37-7.29 (m, 4H), 7.22 (d,  $J$  = 7.1 Hz, 1H), 7.04 (t,  $J$  = 7.4 Hz, 1H), 6.98 (t,  $J$  = 7.4 Hz, 1H), 6.73 (d,  $J$  = 7.2 Hz, 1H), 6.32 (d,  $J$  = 1.3 Hz, 2H).

$^{13}\text{C}$  NMR (100 MHz,  $\text{CDCl}_3$ , 25 °C)  $\delta$ /ppm: 185.7, 166.5, 151.8, 143.3, 142.6, 139.0, 133.6, 133.2, 132.8, 131.3, 130.8, 130.5, 130.2, 129.1, 128.8, 127.4, 125.6, 123.5, 122.1, 121.5, 119.0, 117.6, 112.4, 111.5.

IR (KBr)  $\tilde{\nu}$  ( $\text{cm}^{-1}$ ): 3441, 3243, 2914, 1735, 1699, 1650, 1609, 1491, 1278, 1057, 852, 750.

HRMS (ESI)  $m/z$ :  $[\text{M}+\text{H}]^+$  Calcd for  $\text{C}_{28}\text{H}_{17}^{79}\text{BrN}_2\text{O}_3$  509.0501; found: 509.0497;  $[\text{M}+\text{H}]^+$  Calcd for  $\text{C}_{28}\text{H}_{17}^{81}\text{BrN}_2\text{O}_3$  511.0480; found: 511.0478.

***N*-(3-(4-Bromophenyl)-4-oxo-2-phenylindeno[1,2-*b*]pyrrol-1(4*H*)-yl)pivalamide (7ak)**

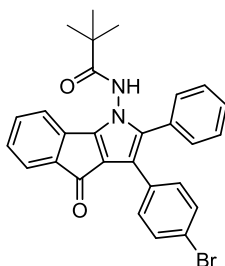

Following the TP-3, **7ak** was obtained from **3a** (190.2 mg, 0.3 mmol), pivaloyl chloride **5k** (40.4  $\mu\text{L}$ , 1.1 equiv) and triethylamine (63  $\mu\text{L}$ , 1.5 equiv). The residue was purified by column chromatography ( $\text{SiO}_2$ , Hexanes/EtOAc= 90:10) to give as an orange solid (89.9 mg, 60% yield) along with zwitterion **3a** (48.1 mg, 25% yield).

$R_f$  = 0.58 (EtOAc:Hexanes = 1:2); mp = 300.0 °C.

$^1\text{H}$  NMR (400 MHz,  $\text{CDCl}_3$ , 25 °C)  $\delta$ /ppm: 8.27 (s, 1H), 7.40 – 7.30 (m, 4H), 7.28 (d,  $J$  = 2.1 Hz, 4H), 7.20 (dd,  $J$  = 8.3, 1.7 Hz, 2H), 7.12 (td,  $J$  = 7.4, 1.4 Hz, 1H), 7.04 (td,  $J$  = 7.3, 1.2 Hz, 1H), 6.7. (d,  $J$  = 7.3 Hz, 1H), 1.08 (s, 9H).

$^{13}\text{C}$  NMR (100 MHz,  $\text{CDCl}_3$ , 25 °C)  $\delta$ /ppm: 186.2, 176.7, 151.3, 139.1, 136.3, 134.3, 132.7, 131.3, 131.1, 130.8, 130.2, 129.4, 129.2, 128.8, 128.3, 123.4, 120.8, 119.4, 119.1, 116.9, 38.5, 27.0.

IR (KBr)  $\tilde{\nu}$  ( $\text{cm}^{-1}$ ): 3437, 2923, 2360, 1740, 1701, 1493, 1151, 865, 749.

HRMS (ESI)  $m/z$ :  $[\text{M}+\text{H}]^+$  Calcd for  $\text{C}_{28}\text{H}_{24}^{79}\text{BrN}_2\text{O}_2$  499.1021; found: 499.1021;  $[\text{M}+\text{H}]^+$  Calcd for  $\text{C}_{28}\text{H}_{24}^{81}\text{BrN}_2\text{O}_2$  501.1001; found: 501.1004.

**General procedure for the preparation of indenopyrrole derivative 7ak from spiro-indene-1,2'-[1,3,4]oxadiazol 8ak:**

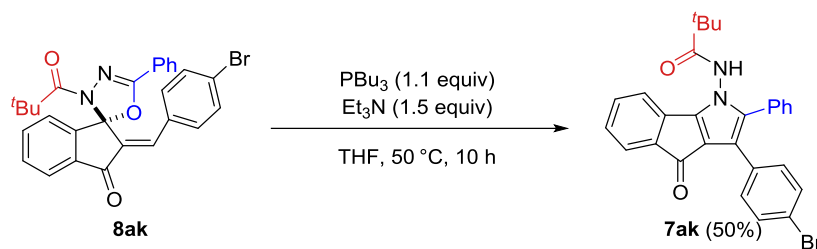

A dry and argon-flushed 10 mL Schlenk flask equipped with a magnetic stir bar and septum was sequentially charged with **8ak** (103.1 mg, 0.2 mmol), anhydrous THF (2 mL),  $\text{PBu}_3$  (54.3  $\mu\text{L}$ , 1.1 equiv) and  $\text{Et}_3\text{N}$  (40.0  $\mu\text{L}$ , 1.5 equiv). The reaction mixture was stirred for 10 h at 50 °C. After completion of the reaction, solvent was removed in *vacuo* and the crude residue was subjected to flash column chromatography ( $\text{SiO}_2$ , Hexanes/ $\text{EtOAc}$ = 90:10) to give the product **7ak** in 50% yield (50.0 mg).

***N*-(3-(4-Bromophenyl)-2-(4-chlorophenyl)-4-oxoindeno[1,2-*b*]pyrrol-1(4*H*)-yl)pivalamide (7ik)**

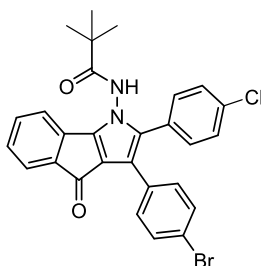

Following the TP-3, **7ik** was obtained from **3i** (200.4 mg, 0.3 mmol), pivaloyl chloride **5k** (40.4  $\mu\text{L}$ , 1.1 equiv) and triethylamine (63  $\mu\text{L}$ , 1.5 equiv). The residue was purified by column chromatography ( $\text{SiO}_2$ , Hexanes/ $\text{EtOAc}$ = 90:10) to give as an orange solid (64.0 mg, 40% yield) along with zwitterion **3i** (72.0 mg, 36% yield).

$R_f$ = 0.58 ( $\text{EtOAc}$ :Hexanes =1:2); mp = 265.3-265.7 °C.

**$^1\text{H}$  NMR** (400 MHz,  $\text{CDCl}_3$ , 25 °C)  $\delta$ /ppm: 8.23 (s, 1H), 7.33 (d,  $J$  = 7.0 Hz, 1H), 7.33 – 7.30 (m, 2H), 7.29 (d,  $J$  = 2.5 Hz, 2H), 7.25 (pt,  $J$  = 2.2 Hz, 1H), 7.23 (t,  $J$  = 2.2 Hz, 1H), 7.14 (dd,  $J$  = 7.6, 1.5 Hz, 1H), 7.12 (dt,  $J$  = 8.4, 1.4 Hz, 2H), 7.06 (td,  $J$  = 7.5, 1.0 Hz, 1H), 6.72 (d,  $J$  = 7.4 Hz, 1H), 1.15 (s, 9H).

**$^{13}\text{C}$  NMR** (100 MHz,  $\text{CDCl}_3$ , 25 °C)  $\delta$ /ppm: 186.1, 176.6, 151.4, 139.1, 135.3, 135.0, 134.1, 132.8, 132.1, 131.3, 130.9, 130.2, 129.1, 128.5, 127.7, 123.6, 121.1, 119.8, 119.2, 117.0, 38.5, 27.1.

**IR** (KBr)  $\tilde{\nu}$  ( $\text{cm}^{-1}$ ): 3430, 2921, 2350, 1735, 1699, 1660, 1495, 1287, 1021, 890, 750.

**HRMS** (ESI)  $m/z$ :  $[M+H]^+$  Calcd for  $C_{28}H_{23}^{79}Br^{35}ClN_2O_2$  533.0631; found: 533.0630;  $[M+H]^+$  Calcd for  $C_{28}H_{23}^{79}Br^{37}ClN_2O_2$  535.0611; found: 535.0612;  $[M+H]^+$  Calcd for  $C_{28}H_{23}^{81}Br^{35}ClN_2O_2$  535.0611; found: 535.0612;  $[M+H]^+$  Calcd for  $C_{28}H_{23}^{81}Br^{37}ClN_2O_2$  537.0581; found: 537.0596.

***N*-(3-(4-Bromophenyl)-4-oxo-2-(*p*-tolyl)indeno[1,2-*b*]pyrrol-1(4*H*)-yl)pivalamide (7jk)**

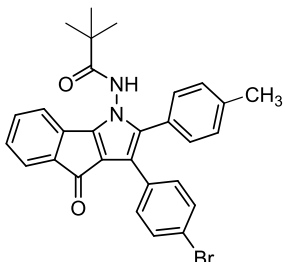

Following the TP-3, **7jk** was obtained from **3j** (194.3 mg, 0.3 mmol), pivaloyl chloride **5k** (40.4  $\mu$ L, 1.1 equiv) and triethylamine (63  $\mu$ L, 1.5 equiv). The residue was purified by column chromatography (SiO<sub>2</sub>, Hexanes/EtOAc= 90:10) to give as an orange solid (69.2 mg, 45% yield) along with zwitterion **3j** (60.1 mg, 31% yield).

$R_f$ = 0.58 (EtOAc:Hexanes =1:2); mp = 281.3-281.7 °C.

**<sup>1</sup>H NMR** (400 MHz, CDCl<sub>3</sub>, 25 °C)  $\delta$ /ppm: 8.64 (s, 1H), 7.24 – 7.19 (m, 5H), 7.05 (pt,  $J$  = 3.6 Hz, 1H), 7.02 (d,  $J$  = 7.0 Hz, 3H), 7.00 (d,  $J$  = 6.9 Hz, 1H), 6.95 (t,  $J$  = 7.2 Hz, 1H), 6.62 (d,  $J$  = 7.2 Hz, 1H), 2.31 (s, 3H), 1.03 (s, 9H).

**<sup>13</sup>C NMR** (100 MHz, CDCl<sub>3</sub>, 25 °C)  $\delta$ /ppm: 186.3, 177.0, 151.1, 139.08, 139.04, 136.5, 134.3, 132.6, 131.4, 131.0, 130.5, 130.1, 129.4, 128.1, 126.1, 123.2, 120.6, 119.1, 118.9, 116.8, 38.4, 26.9, 21.3.

**IR** (KBr)  $\tilde{\nu}$  (cm<sup>-1</sup>): 3428, 2952, 2354, 1735, 1698, 1650, 1492, 1273, 1080, 869, 752.

**HRMS** (ESI)  $m/z$ :  $[M+H]^+$  Calcd for  $C_{29}H_{26}^{79}BrN_2O_2$  513.1178; found: 513.1179;  $[M+H]^+$  Calcd for  $C_{29}H_{26}^{81}BrN_2O_2$  515.1157; found: 515.1161.

**(*E*)-3'-Benzoyl-2-(4-bromobenzylidene)-5'-phenyl-3'*H*-spiro[indene-1,2'-[1,3,4]oxadiazol]-3(2*H*)-one (8aa)**

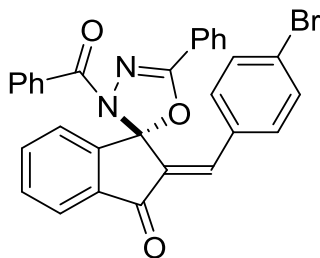

Prepared according to TP-4 from **1a** (132.13 mg, 0.5 mmol), 4-bromo benzaldehyde **2a** (101.76

mg, 1.1 equiv), PhCO<sub>2</sub>H (6.1 mg, 0.1 equiv) and anhydrous THF (5.0 mL). To this stirred reaction mixture, PPh<sub>2</sub>Me (112.8 μL, 1.2 equiv) and pyrrolidine (4.0 μL, 0.1 equiv) were added in sequence. The reaction mixture was stirred for 12 hours at 30 °C. Thereafter, solvent was removed by evaporation in *vacuo* and dissolved in anhydrous THF (5 mL), benzoyl chloride **5a** (87.1 μL, 1.5 equiv) and Et<sub>3</sub>N (133.1 μL, 2.0 equiv.) The residue was purified by column chromatography (SiO<sub>2</sub>, Hexanes/EtOAc= 90:10) to give **8aa** as a yellow solid (120.5 mg, 45% yield).

R<sub>f</sub> = 0.51 (EtOAc:Hexanes = 2:8); mp = 186.9-187.8 °C.

<sup>1</sup>H NMR (400 MHz, CDCl<sub>3</sub>, 25 °C) δ/ppm: 8.01 (d, *J* = 7.3 Hz, 1H), 7.93 (s, 1H), 7.80 (dd, *J* = 8.1, 1.5 Hz, 2H), 7.70 (td, *J* = 7.4, 1.3 Hz, 1H), 7.65 (dd, *J* = 7.5, 1.4 Hz, 1H), 7.61 (dt, *J* = 7.7, 1.3 Hz, 3H), 7.55 (tt, *J* = 7.6, 2.2 Hz, 1H), 7.47 (dt, *J* = 7.9, 1.6 Hz, 2H), 7.46 – 7.43 (m, 1H), 7.36 (t, *J* = 7.8 Hz, 2H), 7.29 (dt, *J* = 8.3, 1.4 Hz, 2H), 7.21 (dt, *J* = 8.5, 2.2 Hz, 2H).

<sup>13</sup>C NMR (100 MHz, CDCl<sub>3</sub>, 25 °C) δ/ppm: 189.2, 163.0, 154.8, 147.1, 138.3, 137.0, 136.0, 135.0, 133.0, 132.4, 132.0, 131.65, 131.60, 131.56, 130.8, 129.6, 128.9, 127.7, 126.9, 124.1, 123.9, 123.7, 123.2, 98.9.

IR (KBr)  $\tilde{\nu}$  (cm<sup>-1</sup>): 3450, 2910, 1680, 1640, 1490, 1372, 1190, 1076, 754.

HRMS (ESI) *m/z*: [M+H]<sup>+</sup> Calcd for C<sub>30</sub>H<sub>20</sub><sup>79</sup>BrN<sub>2</sub>O<sub>3</sub> 535.0657; found: 535.0653; [M+H]<sup>+</sup> Calcd for C<sub>30</sub>H<sub>20</sub><sup>81</sup>BrN<sub>2</sub>O<sub>3</sub> 537.0637; found: 537.0640.

### General procedure for the gram-scale preparation of spiro-indene-1,2'-[1,3,4]oxadiazol derivatives **8aa**:

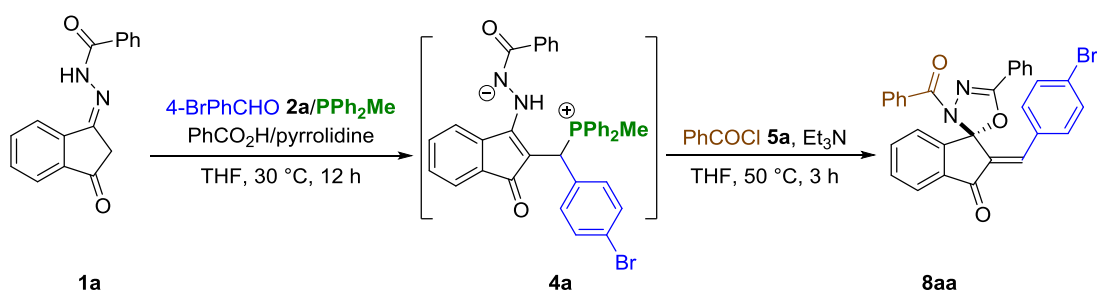

A flame dried and nitrogen-flushed 100-mL round bottom flask equipped with a magnetic stir bar and a septum was sequentially charged with **1** (1.057 g, 4 mmol), **2** (814.1 mg, 1.1 equiv), PhCO<sub>2</sub>H (48.8 mg, 0.1 equiv) and anhydrous THF (40 mL). To this stirred reaction mixture, PPh<sub>2</sub>Me (902.0 μL, 1.2 equiv) and pyrrolidine (32.8 μL, 0.1 equiv) were added in sequence. The reaction mixture was stirred for 12 hours at 30 °C. Thereafter, solvent was removed by evaporation in *vacuo* and

dissolved in anhydrous THF (5 mL), benzoyl chloride **5** (697.0  $\mu\text{L}$ , 1.5 equiv) and  $\text{Et}_3\text{N}$  (1.06 mL, 2.0 equiv). The reaction mixture was stirred for 3 h at 50  $^\circ\text{C}$ . After completion of the reaction, solvent was removed in *vacuo* and the crude residue was subjected to flash column chromatography ( $\text{SiO}_2$ , Hexanes/ $\text{EtOAc}$ = 90:10) to give the product **8aa** in 43% yield (0.920 g).

**(E)-3'-Benzoyl-2-(4-chlorobenzylidene)-5'-phenyl-3'H-spiro[indene-1,2'-[1,3,4]oxadiazol]-3(2H)-one (8ba)**

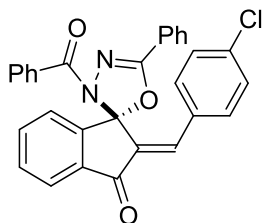

Prepared according to TP-4 from **1a** (132.13 mg, 0.5 mmol), 4-chloro benzaldehyde **2b** (64.4  $\mu\text{L}$ , 1.1 equiv),  $\text{PhCO}_2\text{H}$  (6.1 mg, 0.1 equiv) and anhydrous THF (5.0 mL). To this stirred reaction mixture,  $\text{PPh}_2\text{Me}$  (112.8  $\mu\text{L}$ , 1.2 equiv) and pyrrolidine (4.0  $\mu\text{L}$ , 0.1 equiv) were added in sequence. The reaction mixture was stirred for 12 hours at 30  $^\circ\text{C}$ . Thereafter, solvent was removed by evaporation in *vacuo* and dissolved in anhydrous THF (5 mL), benzoyl chloride **5a** (87.1  $\mu\text{L}$ , 1.5 equiv) and  $\text{Et}_3\text{N}$  (133.1  $\mu\text{L}$ , 2.0 equiv.) The residue was purified by column chromatography ( $\text{SiO}_2$ , Hexanes/ $\text{EtOAc}$ = 90:10) to give **8ba** as a yellow solid (98.2 mg, 40% yield).

$R_f$ = 0.45 ( $\text{EtOAc}$ :Hexanes =2:8); mp = 175.3-174.5  $^\circ\text{C}$ .

**$^1\text{H}$  NMR** (400 MHz,  $\text{CDCl}_3$ , 25  $^\circ\text{C}$ )  $\delta$ /ppm: 8.02 (d,  $J$  = 7.6 Hz, 1H), 7.96 (s, 1H), 7.81 (dd,  $J$  = 8.1, 1.7 Hz, 2H), 7.70 (tt,  $J$  = 7.7, 1.3 Hz, 1H), 7.66 (dd,  $J$  = 7.4, 1.4 Hz, 1H), 7.64 – 7.60 (m, 3H), 7.55 (tt,  $J$  = 7.7, 2.2 Hz, 1H), 7.50 – 7.43 (m, 3H), 7.35 (t,  $J$  = 7.7 Hz, 2H), 7.29 (d,  $J$  = 8.5 Hz, 2H), 7.14 (dt,  $J$  = 8.6, 1.8 Hz, 2H).

**$^{13}\text{C}$  NMR** (100 MHz,  $\text{CDCl}_3$ , 25  $^\circ\text{C}$ )  $\delta$ /ppm: 189.2, 163.1, 154.9, 147.1, 138.3, 137.1, 136.0, 135.6, 134.9, 132.51, 132.48, 132.1, 131.62, 131.57, 130.7, 129.7, 128.9, 128.7, 127.7, 127.0, 124.1, 123.7, 123.2, 99.0.

**IR** (KBr)  $\tilde{\nu}$  ( $\text{cm}^{-1}$ ): 3435, 2900, 1682, 1638, 1495, 1372, 1190, 1060, 750.

**HRMS** (ESI)  $m/z$ :  $[\text{M}+\text{H}]^+$  Calcd for  $\text{C}_{30}\text{H}_{20}^{35}\text{ClN}_2\text{O}_3$  491.1162; found: 491.1163;  $[\text{M}+\text{H}]^+$  Calcd for  $\text{C}_{30}\text{H}_{20}^{37}\text{ClN}_2\text{O}_3$  493.1133; found: 493.1147.

**(E)-3'-Benzoyl-2-benzylidene-5'-phenyl-3'H-spiro[indene-1,2'-[1,3,4]oxadiazol]-3(2H)-one (8ea)**

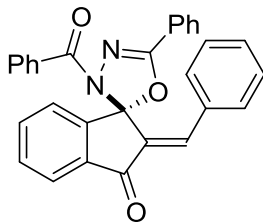

Prepared according to TP-4 from **1a** (132.13 mg, 0.5 mmol), benzaldehyde **2e** (55.90  $\mu\text{L}$ , 1.1 equiv),  $\text{PhCO}_2\text{H}$  (6.1 mg, 0.1 equiv) and anhydrous THF (5.0 mL). To this stirred reaction mixture,  $\text{PPh}_2\text{Me}$  (112.8  $\mu\text{L}$ , 1.2 equiv) and pyrrolidine (4.0  $\mu\text{L}$ , 0.1 equiv) were added in sequence. The reaction mixture was stirred for 12 hours at 30  $^\circ\text{C}$ . Thereafter, solvent was removed by evaporation *in vacuo* and dissolved in anhydrous THF (5 mL), benzoyl chloride **5a** (87.1  $\mu\text{L}$ , 1.5 equiv) and  $\text{Et}_3\text{N}$  (133.1  $\mu\text{L}$ , 2.0 equiv.) The residue was purified by column chromatography ( $\text{SiO}_2$ , Hexanes/ $\text{EtOAc}$ = 90:10) to give **8ea** as a yellow solid (79.9 mg, 35% yield).

$R_f$ = 0.65 ( $\text{EtOAc}$ :Hexanes =2:8); mp = 163.5-164.2  $^\circ\text{C}$ .

**$^1\text{H}$  NMR** (400 MHz,  $\text{CDCl}_3$ , 25  $^\circ\text{C}$ )  $\delta$ /ppm: 8.05 (s, 1H), 8.02 (d,  $J$  = 7.4 Hz, 1H), 7.80 (dd,  $J$  = 7.8, 1.7 Hz, 2H), 7.69 (td,  $J$  = 7.5, 1.6 Hz, 1H), 7.65 (dd,  $J$  = 7.5, 1.4 Hz, 1H), 7.60 (d,  $J$  = 8.2 Hz, 1H), 7.57 (d,  $J$  = 7.9 Hz, 2H), 7.52 (dt,  $J$  = 7.6, 2.2 Hz, 1H), 7.45 (dd,  $J$  = 8.0, 1.7 Hz, 2H), 7.42 (dd,  $J$  = 7.0, 1.4 Hz, 1H), 7.37 (d,  $J$  = 7.4 Hz, 2H), 7.31 (t,  $J$  = 7.8 Hz, 2H), 7.23 (dt,  $J$  = 7.5, 2.3 Hz, 1H), 7.17 (t,  $J$  = 7.7 Hz, 2H).

**$^{13}\text{C}$  NMR** (100 MHz,  $\text{CDCl}_3$ , 25  $^\circ\text{C}$ )  $\delta$ /ppm: 189.4, 163.1, 154.8, 147.2, 140.0, 137.1, 135.8, 134.3, 134.1, 132.7, 131.8, 131.5, 131.4, 129.7, 129.4, 129.3, 128.7, 128.4, 127.6, 127.0, 124.3, 123.7, 123.2, 99.0.

**IR** (KBr)  $\tilde{\nu}$  ( $\text{cm}^{-1}$ ): 3448, 2912, 1679, 1638, 1492, 1371, 1198, 1075, 751.

**HRMS** (ESI)  $m/z$ :  $[\text{M}+\text{H}]^+$  Calcd for  $\text{C}_{30}\text{H}_{21}\text{N}_2\text{O}_3$  457.1552; found: 457.1550.

**(E)-3'-Benzoyl-2-(2-methoxybenzylidene)-5'-phenyl-3'H-spiro[indene-1,2'-[1,3,4]oxadiazol]-3(2H)-one (8ha)**

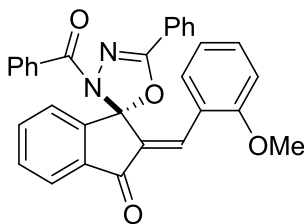

Prepared according to TP-4 from **1a** (132.13 mg, 0.5 mmol), 2-methoxy benzaldehyde **2h** (66.4  $\mu\text{L}$ , 1.1 equiv),  $\text{PhCO}_2\text{H}$  (6.1 mg, 0.1 equiv) and anhydrous THF (5.0 mL). To this stirred reaction



mixture, PPh<sub>2</sub>Me (112.8 μL, 1.2 equiv) and pyrrolidine (4.0 μL, 0.1 equiv) were added in sequence. The reaction mixture was stirred for 12 hours at 30 °C. Thereafter, solvent was removed by evaporation in *vacuo* and dissolved in anhydrous THF (5 mL), benzoyl chloride **5a** (87.1 μL, 1.5 equiv) and Et<sub>3</sub>N (133.1 μL, 2.0 equiv.) The residue was purified by column chromatography (SiO<sub>2</sub>, Hexanes/EtOAc= 87:13) to give **8ha** as a yellow solid (99.9 mg, 41% yield).

R<sub>f</sub>= 0.28 (EtOAc:Hexanes =2:8); mp = 198.1-199.0 °C.

<sup>1</sup>H NMR (400 MHz, CDCl<sub>3</sub>, 25 °C) δ/ppm: 8.20 (s, 1H), 8.01 (d, *J* = 7.4 Hz, 1H), 7.74 (dd, *J* = 7.9, 1.5 Hz, 2H), 7.67 (dd, *J* = 7.2, 1.2 Hz, 3H), 7.62 (pt, *J* = 7.5, 1.3 Hz, 1H), 7.59 (d, *J* = 7.5 Hz, 1H), 7.50 (tt, *J* = 7.5, 2.2 Hz, 1H), 7.47 – 7.39 (m, 3H), 7.33 (t, *J* = 7.7 Hz, 2H), 7.22 (d, *J* = 7.6 Hz, 1H), 7.17 (td, *J* = 8.1, 1.7 Hz, 1H), 6.67 (d, *J* = 8.3 Hz, 1H), 6.59 (t, *J* = 7.5 Hz, 1H), 3.59 (s, 3H).

<sup>13</sup>C NMR (100 MHz, CDCl<sub>3</sub>, 25 °C) δ/ppm: 189.4, 162.8, 157.9, 154.6, 147.2, 137.4, 136.9, 135.6, 135.0, 132.8, 131.6, 131.35, 131.29, 130.8, 129.8, 129.7, 128.6, 127.6, 126.9, 124.5, 123.6, 123.3, 120.0, 110.5, 99.1, 55.4.

IR (KBr)  $\tilde{\nu}$  (cm<sup>-1</sup>): 3442, 2918, 1683, 1639, 1498, 1376, 1195, 1072, 759.

HRMS (ESI) *m/z*: [M+H]<sup>+</sup> Calcd for C<sub>31</sub>H<sub>23</sub>N<sub>2</sub>O<sub>4</sub> 487.1658; found: 487.1657.

**(*E*)-2-Benzylidene-3'-(4-chlorobenzoyl)-5'-phenyl-3'*H*-spiro[indene-1,2'-[1,3,4]oxadiazol]-3(2*H*)-one (8ac)**

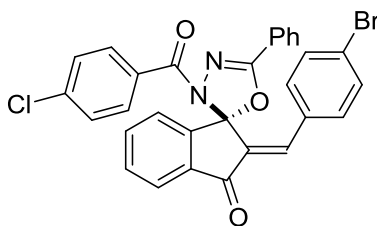

Prepared according to TP-4 from **1a** (132.13 mg, 0.5 mmol), 4-bromo benzaldehyde **2a** (101.76 mg, 1.1 equiv), PhCO<sub>2</sub>H (6.1 mg, 0.1 equiv) and anhydrous THF (5.0 mL). To this stirred reaction mixture, PPh<sub>2</sub>Me (112.8 μL, 1.2 equiv) and pyrrolidine (4.0 μL, 0.1 equiv) were added in sequence. The reaction mixture was stirred for 12 hours at 30 °C. Thereafter, solvent was removed by evaporation in *vacuo* and dissolved in anhydrous THF (5 mL), 4-chloro benzoyl chloride **5c** (96.2 μL, 1.5 equiv) and Et<sub>3</sub>N (133.1 μL, 2.0 equiv.) The residue was purified by column chromatography (SiO<sub>2</sub>, Hexanes/EtOAc= 90:10) to give **8ac** as a yellow solid (108.3 mg, 38% yield).

R<sub>f</sub> = 0.54 (EtOAc:Hexanes = 2:8); mp = 179.0-180.1 °C.

<sup>1</sup>H NMR (400 MHz, CDCl<sub>3</sub>, 25 °C) δ/ppm: 8.01 (d, *J* = 7.4 Hz, 1H), 7.93 (s, 1H), 7.79 (dd, *J* = 8.2, 1.6 Hz, 2H), 7.70 (td, *J* = 7.5, 1.4 Hz, 1H), 7.65 (td, *J* = 7.5, 1.4 Hz, 1H), 7.62 – 7.54 (m, 4H), 7.48 (t, *J* = 7.4 Hz, 2H), 7.33 (td, *J* = 8.6, 1.8 Hz, 2H), 7.28 (dt, *J* = 8.4, 1.8 Hz, 2H), 7.18 (d, *J* = 8.4 Hz, 2H).

<sup>13</sup>C NMR (100 MHz, CDCl<sub>3</sub>, 25 °C) δ/ppm: 189.0, 161.9, 155.0, 146.9, 138.4, 137.8, 137.0, 136.0, 134.9, 132.9, 132.2, 131.69, 131.64, 131.1, 130.8, 130.6, 128.9, 128.0, 126.9, 123.9, 123.7, 123.2, 98.9.

IR (KBr)  $\tilde{\nu}$  (cm<sup>-1</sup>): 3452, 2912, 1682, 1644, 1492, 1374, 1191, 1070, 748.

HRMS (ESI) *m/z*: [M+H]<sup>+</sup> Calcd for C<sub>30</sub>H<sub>19</sub><sup>79</sup>Br<sup>35</sup>ClN<sub>2</sub>O<sub>3</sub> 569.0268; found: 569.0266; [M+H]<sup>+</sup> Calcd for C<sub>30</sub>H<sub>19</sub><sup>79</sup>Br<sup>37</sup>ClN<sub>2</sub>O<sub>3</sub> 571.0238; found: 571.0247; [M+H]<sup>+</sup> Calcd for C<sub>30</sub>H<sub>19</sub><sup>81</sup>Br<sup>35</sup>ClN<sub>2</sub>O<sub>3</sub> 572.0247; found: 572.0278; [M+H]<sup>+</sup> Calcd for C<sub>30</sub>H<sub>19</sub><sup>81</sup>Br<sup>37</sup>ClN<sub>2</sub>O<sub>3</sub> 573.0218; found: 573.0235.

**(E)-2-Benzylidene-3'-(4-methoxybenzoyl)-5'-phenyl-3'*H*-spiro[indene-1,2'-[1,3,4]oxadiazol]-3(2*H*)-one (8a)**

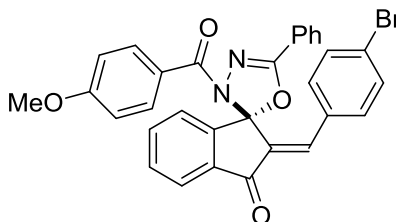

Prepared according to TP-4 from **1a** (132.13 mg, 0.5 mmol), 4-bromo benzaldehyde **2a** (101.76 mg, 1.1 equiv), PhCO<sub>2</sub>H (6.1 mg, 0.1 equiv) and anhydrous THF (5.0 mL). To this stirred reaction mixture, PPh<sub>2</sub>Me (112.8 μL, 1.2 equiv) and pyrrolidine (4.0 μL, 0.1 equiv) were added in sequence. The reaction mixture was stirred for 12 hours at 30 °C. Thereafter, solvent was removed by evaporation in *vacuo* and dissolved in anhydrous THF (5 mL), 4-methoxy benzoyl chloride **5l** (101.5 μL, 1.5 equiv) and Et<sub>3</sub>N (133.1 μL, 2.0 equiv.) The residue was purified by column chromatography (SiO<sub>2</sub>, Hexanes/EtOAc = 85:15) to give **8a** as a yellow solid (113.1 mg, 40% yield).

R<sub>f</sub> = 0.26 (EtOAc:Hexanes = 2:8); mp = 187.1-188.0 °C.

<sup>1</sup>H NMR (400 MHz, CDCl<sub>3</sub>, 25 °C) δ/ppm: 8.00 (d, *J* = 7.3 Hz, 1H), 7.91 (s, 1H), 7.80 (dd, *J* = 8.3, 1.5 Hz, 2H), 7.72 (dt, *J* = 8.8, 1.8 Hz, 2H), 7.68 (dd, *J* = 7.4, 1.4 Hz, 1H), 7.64 (dd, *J* = 7.5, 1.4 Hz, 1H), 7.60 (d, *J* = 8.2 Hz, 1H), 7.55 (tt, *J* = 7.5, 2.1 Hz, 1H), 7.47 (tt, *J* = 7.4, 1.7 Hz, 2H),

7.27 (d,  $J = 8.4$  Hz, 2H), 7.19 (dt,  $J = 8.6, 2.2$  Hz, 2H), 6.86 (dt,  $J = 8.1, 2.1$  Hz, 2H), 3.85 (s, 3H).  
 $^{13}\text{C NMR}$  (100 MHz,  $\text{CDCl}_3$ , 25 °C)  $\delta$ /ppm: 189.3, 162.4, 162.3, 154.7, 147.3, 138.1, 136.9, 135.9, 135.3, 133.0, 131.9, 131.59, 131.52, 130.8, 128.9, 126.9, 124.5, 124.1, 123.8, 123.7, 123.3, 113.0, 99.0, 55.4.

**IR** (KBr)  $\tilde{\nu}$  ( $\text{cm}^{-1}$ ): 3448, 2908, 1672, 1630, 1495, 1365, 1185, 1076, 742.

**HRMS** (ESI)  $m/z$ :  $[\text{M}+\text{H}]^+$  Calcd for  $\text{C}_{31}\text{H}_{22}^{79}\text{BrN}_2\text{O}_4$  565.0763; found: 565.0764;  $[\text{M}+\text{H}]^+$  Calcd for  $\text{C}_{31}\text{H}_{22}^{81}\text{BrN}_2\text{O}_4$  567.0742; found: 567.0749.

**(*E*)-2-Benzylidene-3'-(2-chlorobenzoyl)-5'-phenyl-3'*H*-spiro[indene-1,2'-[1,3,4]oxadiazol]-3(2*H*)-one (8ai)**

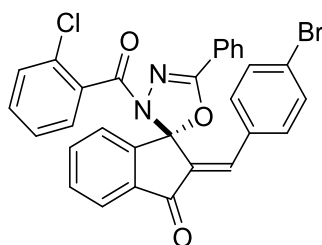

Prepared according to TP-4 from **1a** (132.13 mg, 0.5 mmol), 4-bromo benzaldehyde **2a** (101.76 mg, 1.1 equiv),  $\text{PhCO}_2\text{H}$  (6.1 mg, 0.1 equiv) and anhydrous THF (5.0 mL). To this stirred reaction mixture,  $\text{PPh}_2\text{Me}$  (112.8  $\mu\text{L}$ , 1.2 equiv) and pyrrolidine (4.0  $\mu\text{L}$ , 0.1 equiv) were added in sequence. The reaction mixture was stirred for 12 hours at 30 °C. Thereafter, solvent was removed by evaporation in *vacuo* and dissolved in anhydrous THF (5 mL), 4-chloro benzoyl chloride **5i** (95.0  $\mu\text{L}$ , 1.5 equiv) and  $\text{Et}_3\text{N}$  (133.1  $\mu\text{L}$ , 2.0 equiv.) The residue was purified by column chromatography ( $\text{SiO}_2$ , Hexanes/ $\text{EtOAc} = 85:15$ ) to give **8ai** as a yellow solid (105.4 mg, 37% yield).

$R_f = 0.40$  ( $\text{EtOAc}:\text{Hexanes} = 2:8$ ); mp = 199.0-200.1 °C.

$^1\text{H NMR}$  (400 MHz,  $\text{CDCl}_3$ , 25 °C)  $\delta$ /ppm: 8.01 (d,  $J = 7.7$  Hz, 1H), 7.98 (s, 1H), 7.78 – 7.70 (m, 4H), 7.67 (tt,  $J = 7.3, 2.0$  Hz, 1H), 7.52 (tt,  $J = 7.5, 1.9$  Hz, 1H), 7.41 (t,  $J = 7.5$  Hz, 2H), 7.35 (d,  $J = 8.7$  Hz, 3H), 7.31 (d,  $J = 8.6$  Hz, 3H), 7.21 (tt,  $J = 7.5, 1.9$  Hz, 1H), 6.72 (dd,  $J = 7.8, 1.7$  Hz, 1H).

$^{13}\text{C NMR}$  (100 MHz,  $\text{CDCl}_3$ , 25 °C)  $\delta$ /ppm: 189.1, 162.2, 155.0, 146.5, 138.9, 137.2, 136.0, 134.3, 133.9, 132.7, 132.1, 131.8, 131.7, 131.4, 131.1, 130.7, 129.5, 128.8, 128.5, 127.1, 126.4, 124.4, 123.9, 123.68, 123.64, 98.4.

**IR** (KBr)  $\tilde{\nu}$  ( $\text{cm}^{-1}$ ): 3442, 2902, 1678, 1635, 1490, 1350, 1185, 1050, 737.

**HRMS** (ESI)  $m/z$ :  $[M+H]^+$  Calcd for  $C_{30}H_{19}^{79}Br^{35}ClN_2O_3$  569.0268; found: 569.0269;  $[M+H]^+$  Calcd for  $C_{30}H_{19}^{79}Br^{37}ClN_2O_3$  571.0238; found: 571.0250;  $[M+H]^+$  Calcd for  $C_{30}H_{19}^{81}Br^{35}ClN_2O_3$  572.0247; found: 572.0279;  $[M+H]^+$  Calcd for  $C_{30}H_{19}^{81}Br^{37}ClN_2O_3$  573.0218; found: 573.0230.

**(E)-2-Benzylidene-5'-phenyl-3'-(thiophene-2-carbonyl)-3'H-spiro[indene-1,2'-[1,3,4]oxadiazol]-3(2H)-one (8am)**

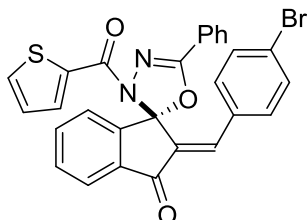

Prepared according to TP-4 from **1a** (132.13 mg, 0.5 mmol), 4-bromo benzaldehyde **2a** (101.76 mg, 1.1 equiv),  $PhCO_2H$  (6.1 mg, 0.1 equiv) and anhydrous THF (5.0 mL). To this stirred reaction mixture,  $PPh_2Me$  (112.8  $\mu L$ , 1.2 equiv) and pyrrolidine (4.0  $\mu L$ , 0.1 equiv) were added in sequence. The reaction mixture was stirred for 12 hours at 30 °C. Thereafter, solvent was removed by evaporation in *vacuo* and dissolved in anhydrous THF (5 mL), 2-thiophenecarbonyl chloride **5m** (80.3  $\mu L$ , 1.5 equiv) and  $Et_3N$  (133.1  $\mu L$ , 2.0 equiv.) The residue was purified by column chromatography ( $SiO_2$ , Hexanes/ $EtOAc$ = 85:15) to give **8am** as a yellow solid (105.6 mg, 39% yield).

$R_f$  = 0.43 ( $EtOAc$ :Hexanes =2:8); mp = 196.5-197.3 °C.

**$^1H$  NMR** (400 MHz,  $CDCl_3$ , 25 °C)  $\delta$ /ppm: 8.0 (d,  $J$  = 7.4 Hz, 1H), 7.97 (d,  $J$  = 6.5 Hz, 1H), 7.92 (s, 1H), 7.82 (d,  $J$  = 7.7 Hz, 2H), 7.69 (t,  $J$  = 7.4 Hz, 1H), 7.64 (d,  $J$  = 7.3 Hz, 1H), 7.60 (t,  $J$  = 7.2 Hz, 2H), 7.56 (d,  $J$  = 7.4 Hz, 1H), 7.49 (t,  $J$  = 7.6 Hz, 2H), 7.18 (d,  $J$  = 8.6 Hz, 2H), 7.10 (d,  $J$  = 8.6 Hz, 2H), 7.08 (d,  $J$  = 7.0 Hz, 1H).

**$^{13}C$  NMR** (100 MHz,  $CDCl_3$ , 25 °C)  $\delta$ /ppm: 188.9, 156.5, 155.2, 146.6, 138.5, 137.2, 135.9, 135.3, 134.7, 133.9, 133.4, 132.6, 132.1, 131.7, 131.6, 130.5, 128.9, 126.9, 123.9, 123.7, 123.6, 123.5, 98.9.

**IR** (KBr)  $\tilde{\nu}$  ( $cm^{-1}$ ): 3445, 2900, 1659, 1548, 1472, 1372, 1398, 1308, 1283, 1190, 1075, 750.

**HRMS** (ESI)  $m/z$ :  $[M+H]^+$  Calcd for  $C_{28}H_{18}^{79}BrN_2O_3S$  541.0222; found: 541.0223;  $[M+H]^+$  Calcd for  $C_{28}H_{18}^{81}BrN_2O_3S$  543.0201; found: 543.0204.

**(E)-2-Benzylidene-5'-phenyl-3'-pivaloyl-3'H-spiro[indene-1,2'-[1,3,4]oxadiazol]-3(2H)-one (8ak)**

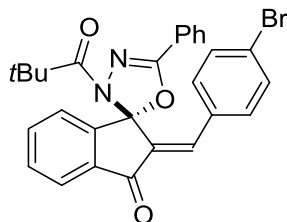

Prepared according to TP-4 from **1a** (132.13 mg, 0.5 mmol), 4-bromo benzaldehyde **2a** (101.76 mg, 1.1 equiv), PhCO<sub>2</sub>H (6.1 mg, 0.1 equiv) and anhydrous THF (5.0 mL). To this stirred reaction mixture, PPh<sub>2</sub>Me (112.8 μL, 1.2 equiv) and pyrrolidine (4.0 μL, 0.1 equiv) were added in sequence. The reaction mixture was stirred for 12 hours at 30 °C. Thereafter, solvent was removed by evaporation in *vacuo* and dissolved in anhydrous THF (5 mL), Pivaloyl chloride **5k** (91.8 μL, 1.5 equiv) and Et<sub>3</sub>N (133.1 μL, 2.0 equiv.) The residue was purified by column chromatography (SiO<sub>2</sub>, Hexanes/EtOAc= 85:15) to give **8ak** as a yellow solid (77.3 mg, 30% yield).

R<sub>f</sub> = 0.60 (EtOAc:Hexanes = 2:8); mp = 201.1-202.0 °C.

**<sup>1</sup>H NMR** (400 MHz, CDCl<sub>3</sub>, 25 °C) δ/ppm: 7.95 (d, *J* = 7.6 Hz, 1H), 7.84 (s, 1H), 7.81 (dd, *J* = 7.7, 1.6 Hz, 2H), 7.67 (td, *J* = 7.4, 1.3 Hz, 1H), 7.60 (td, *J* = 7.5, 1.3 Hz, 1H), 7.55 (tt, *J* = 7.5, 2.3 Hz, 1H), 7.51 (d, *J* = 7.7 Hz, 1H), 7.47 (t, *J* = 7.8 Hz, 2H), 7.31 (dt, *J* = 8.4, 1.8 Hz, 2H), 7.23 (dt, *J* = 8.6, 2.3 Hz, 2H), 1.16 (s, 9H).

**<sup>13</sup>C NMR** (100 MHz, CDCl<sub>3</sub>, 25 °C) δ/ppm: 189.3, 172.9, 153.5, 147.4, 137.6, 137.0, 135.8, 134.8, 132.8, 131.8, 131.5, 131.4, 131.2, 128.9, 126.7, 124.3, 124.0, 123.6, 122.6, 98.9, 39.5, 26.1.

**IR** (KBr)  $\tilde{\nu}$  (cm<sup>-1</sup>): 3196, 2905, 1692, 1595, 1475, 1442, 1406, 1371, 1306, 1223, 1050, 750.

**HRMS** (ESI) *m/z*: [M+H]<sup>+</sup> Calcd for C<sub>28</sub>H<sub>24</sub><sup>79</sup>BrN<sub>2</sub>O<sub>3</sub> 515.0970; found: 515.0969; [M+H]<sup>+</sup> Calcd for C<sub>28</sub>H<sub>24</sub><sup>81</sup>BrN<sub>2</sub>O<sub>3</sub> 517.0950; found: 517.0953.

## **VI. References:**

- 1 C.-J. Lee, Y.-J. Jang, Z.-Z. Wu and W. Lin, *Org. Lett.* 2012, **14**, 1906.
- 2 R. Saijo, H. Uno, S. Mori and M. Kawase, *Chem. Commun.* 2016, **52**, 8006.

## VII. X-Ray crystallographic data for selected compounds:

a) **3a** (CCDC no. 2009731): The thermal ellipsoid drawn at 50% probability level.

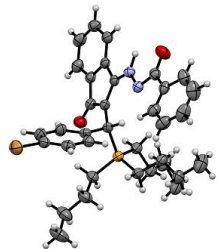

The purified compound **3a** is dissolved in a mixed solvent of CH<sub>2</sub>Cl<sub>2</sub> and hexanes to slowly evaporate. After few days, colorless crystals were obtained.

|                                   |                                                                    |                   |
|-----------------------------------|--------------------------------------------------------------------|-------------------|
| Empirical formula                 | C <sub>35</sub> H <sub>42</sub> Br N <sub>2</sub> O <sub>2</sub> P |                   |
| Formula weight                    | 633.59                                                             |                   |
| Temperature                       | 200(2) K                                                           |                   |
| Wavelength                        | 0.71073 Å                                                          |                   |
| Crystal system                    | Monoclinic                                                         |                   |
| Space group                       | P 2 <sub>1</sub> /n                                                |                   |
| Unit cell dimensions              | a = 10.0157(3) Å                                                   | α = 90°.          |
|                                   | b = 12.5956(4) Å                                                   | β = 91.1220(10)°. |
|                                   | c = 26.5786(8) Å                                                   | γ = 90°.          |
| Volume                            | 3352.35(18) Å <sup>3</sup>                                         |                   |
| Z                                 | 4                                                                  |                   |
| Density (calculated)              | 1.255 Mg/m <sup>3</sup>                                            |                   |
| Absorption coefficient            | 1.306 mm <sup>-1</sup>                                             |                   |
| F(000)                            | 1328                                                               |                   |
| Crystal size                      | 0.22 x 0.17 x 0.07 mm <sup>3</sup>                                 |                   |
| Theta range for data collection   | 2.19 to 25.06°.                                                    |                   |
| Index ranges                      | -11 ≤ h ≤ 11, -15 ≤ k ≤ 14, -31 ≤ l ≤ 31                           |                   |
| Reflections collected             | 44500                                                              |                   |
| Independent reflections           | 5913 [R(int) = 0.0691]                                             |                   |
| Completeness to theta = 25.06°    | 99.9 %                                                             |                   |
| Absorption correction             | multi-scan                                                         |                   |
| Max. and min. transmission        | 0.9142 and 0.7621                                                  |                   |
| Refinement method                 | Full-matrix least-squares on F <sup>2</sup>                        |                   |
| Data / restraints / parameters    | 5913 / 0 / 367                                                     |                   |
| Goodness-of-fit on F <sup>2</sup> | 1.108                                                              |                   |
| Final R indices [I > 2σ(I)]       | R1 = 0.0461, wR2 = 0.1198                                          |                   |
| R indices (all data)              | R1 = 0.0657, wR2 = 0.1292                                          |                   |
| Largest diff. peak and hole       | 0.700 and -0.582 e.Å <sup>-3</sup>                                 |                   |

b) **6aa** (CCDC no. 2016707): The thermal ellipsoid drawn at 65% probability level

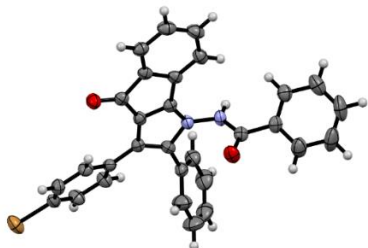

The purified compound **6aa** is dissolved in a mixed solvent of CH<sub>2</sub>Cl<sub>2</sub> and hexanes to slowly evaporate. After few days, colorless crystals were obtained.

|                                   |                                                                                                                                                          |
|-----------------------------------|----------------------------------------------------------------------------------------------------------------------------------------------------------|
| Empirical formula                 | C <sub>30</sub> H <sub>21</sub> Br N <sub>2</sub> O <sub>3</sub>                                                                                         |
| Formula weight                    | 537.40                                                                                                                                                   |
| Temperature                       | 200(2) K                                                                                                                                                 |
| Wavelength                        | 0.71073 Å                                                                                                                                                |
| Crystal system                    | Monoclinic                                                                                                                                               |
| Space group                       | P 21/c                                                                                                                                                   |
| Unit cell dimensions              | a = 7.0854(2) Å                      α = 90°.<br>b = 18.2878(6) Å                     β = 98.9890(10)°.<br>c = 19.8064(7) Å                     γ = 90°. |
| Volume                            | 2534.92(14) Å <sup>3</sup>                                                                                                                               |
| Z                                 | 4                                                                                                                                                        |
| Density (calculated)              | 1.408 Mg/m <sup>3</sup>                                                                                                                                  |
| Absorption coefficient            | 1.656 mm <sup>-1</sup>                                                                                                                                   |
| F(000)                            | 1096                                                                                                                                                     |
| Crystal size                      | 0.74 x 0.04 x 0.01 mm <sup>3</sup>                                                                                                                       |
| Theta range for data collection   | 2.36 to 25.09°.                                                                                                                                          |
| Index ranges                      | -8<=h<=7, -21<=k<=21, -23<=l<=23                                                                                                                         |
| Reflections collected             | 33421                                                                                                                                                    |
| Independent reflections           | 4498 [R(int) = 0.0654]                                                                                                                                   |
| Completeness to theta = 25.09°    | 99.6 %                                                                                                                                                   |
| Absorption correction             | multi-scan                                                                                                                                               |
| Max. and min. transmission        | 0.9836 and 0.3737                                                                                                                                        |
| Refinement method                 | Full-matrix least-squares on F <sup>2</sup>                                                                                                              |
| Data / restraints / parameters    | 4498 / 0 / 325                                                                                                                                           |
| Goodness-of-fit on F <sup>2</sup> | 1.017                                                                                                                                                    |
| Final R indices [I>2sigma(I)]     | R1 = 0.0333, wR2 = 0.0703                                                                                                                                |
| R indices (all data)              | R1 = 0.0510, wR2 = 0.0786                                                                                                                                |
| Largest diff. peak and hole       | 0.247 and -0.448 e.Å <sup>-3</sup>                                                                                                                       |

c) **6ae** (CCDC no. 2009642): The thermal ellipsoid drawn at 55% probability level.

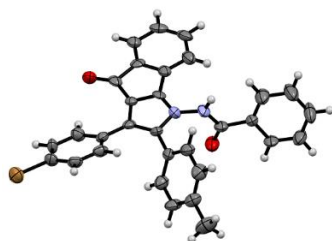

The purified compound **6ae** is dissolved in a mixed solvent of CH<sub>2</sub>Cl<sub>2</sub> and hexanes to slowly evaporate. After few days, colorless crystals were obtained.

|                                   |                                                                               |                  |
|-----------------------------------|-------------------------------------------------------------------------------|------------------|
| Empirical formula                 | C <sub>62</sub> H <sub>44</sub> Br <sub>2</sub> N <sub>4</sub> O <sub>5</sub> |                  |
| Formula weight                    | 1084.83                                                                       |                  |
| Temperature                       | 200(2) K                                                                      |                  |
| Wavelength                        | 0.71073 Å                                                                     |                  |
| Crystal system                    | Triclinic                                                                     |                  |
| Space group                       | P -1                                                                          |                  |
| Unit cell dimensions              | a = 11.994(4) Å                                                               | α = 96.769(8)°.  |
|                                   | b = 12.841(5) Å                                                               | β = 100.451(8)°. |
|                                   | c = 16.952(6) Å                                                               | γ = 97.043(8)°.  |
| Volume                            | 2521.9(15) Å <sup>3</sup>                                                     |                  |
| Z                                 | 2                                                                             |                  |
| Density (calculated)              | 1.429 Mg/m <sup>3</sup>                                                       |                  |
| Absorption coefficient            | 1.664 mm <sup>-1</sup>                                                        |                  |
| F(000)                            | 1108                                                                          |                  |
| Crystal size                      | 0.11 x 0.06 x 0.02 mm <sup>3</sup>                                            |                  |
| Theta range for data collection   | 2.17 to 25.13°.                                                               |                  |
| Index ranges                      | -14<=h<=14, -15<=k<=15, -20<=l<=20                                            |                  |
| Reflections collected             | 81656                                                                         |                  |
| Independent reflections           | 8981 [R(int) = 0.2092]                                                        |                  |
| Completeness to theta = 25.13°    | 99.5 %                                                                        |                  |
| Absorption correction             | multi-scan                                                                    |                  |
| Max. and min. transmission        | 0.9675 and 0.8381                                                             |                  |
| Refinement method                 | Full-matrix least-squares on F <sup>2</sup>                                   |                  |
| Data / restraints / parameters    | 8981 / 0 / 660                                                                |                  |
| Goodness-of-fit on F <sup>2</sup> | 1.029                                                                         |                  |
| Final R indices [I>2sigma(I)]     | R1 = 0.0877, wR2 = 0.1633                                                     |                  |
| R indices (all data)              | R1 = 0.2037, wR2 = 0.2056                                                     |                  |
| Largest diff. peak and hole       | 0.645 and -0.662 e.Å <sup>-3</sup>                                            |                  |



d) **6ai** (CCDC no. 2009644): The thermal ellipsoid drawn at 60% probability level.

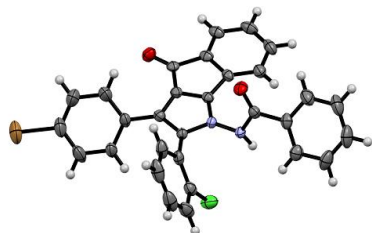

The purified compound **6ai** is dissolved in a mixed solvent of CH<sub>2</sub>Cl<sub>2</sub> and hexanes to slowly evaporate. After few days, colorless crystals were obtained.

|                                   |                                                                   |                    |
|-----------------------------------|-------------------------------------------------------------------|--------------------|
| Empirical formula                 | C <sub>30</sub> H <sub>20</sub> BrClN <sub>2</sub> O <sub>3</sub> |                    |
| Formula weight                    | 571.84                                                            |                    |
| Temperature                       | 200(2) K                                                          |                    |
| Wavelength                        | 0.71073 Å                                                         |                    |
| Crystal system                    | Monoclinic                                                        |                    |
| Space group                       | C 2/c                                                             |                    |
| Unit cell dimensions              | a = 30.7223(10) Å                                                 | α = 90°.           |
|                                   | b = 6.9755(2) Å                                                   | β = 115.5280(10)°. |
|                                   | c = 27.9045(9) Å                                                  | γ = 90°.           |
| Volume                            | 5396.2(3) Å <sup>3</sup>                                          |                    |
| Z                                 | 8                                                                 |                    |
| Density (calculated)              | 1.408 Mg/m <sup>3</sup>                                           |                    |
| Absorption coefficient            | 1.656 mm <sup>-1</sup>                                            |                    |
| F(000)                            | 2320                                                              |                    |
| Crystal size                      | 0.16 x 0.09 x 0.02 mm <sup>3</sup>                                |                    |
| Theta range for data collection   | 2.61 to 25.04°.                                                   |                    |
| Index ranges                      | -35 ≤ h ≤ 36, -8 ≤ k ≤ 8, -32 ≤ l ≤ 32                            |                    |
| Reflections collected             | 36745                                                             |                    |
| Independent reflections           | 4758 [R(int) = 0.0582]                                            |                    |
| Completeness to theta = 25.04°    | 99.5 %                                                            |                    |
| Absorption correction             | multi-scan                                                        |                    |
| Max. and min. transmission        | 0.9676 and 0.7775                                                 |                    |
| Refinement method                 | Full-matrix least-squares on F <sup>2</sup>                       |                    |
| Data / restraints / parameters    | 4758 / 0 / 335                                                    |                    |
| Goodness-of-fit on F <sup>2</sup> | 0.994                                                             |                    |
| Final R indices [I > 2σ(I)]       | R1 = 0.0702, wR2 = 0.1844                                         |                    |
| R indices (all data)              | R1 = 0.0909, wR2 = 0.1973                                         |                    |
| Largest diff. peak and hole       | 2.155 and -1.374 e.Å <sup>-3</sup>                                |                    |

e) **6aj** (CCDC no. 2009643): The thermal ellipsoid drawn at 60% probability level.

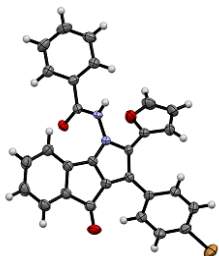

The purified compound **6aj** is dissolved in a mixed solvent of Ethyl acetate and hexanes to slowly evaporate. After few days, colorless crystals were obtained.

|                                   |                                                                  |                   |
|-----------------------------------|------------------------------------------------------------------|-------------------|
| Empirical formula                 | C <sub>28</sub> H <sub>17</sub> Br N <sub>2</sub> O <sub>3</sub> |                   |
| Formula weight                    | 509.35                                                           |                   |
| Temperature                       | 200(2) K                                                         |                   |
| Wavelength                        | 0.71073 Å                                                        |                   |
| Crystal system                    | Monoclinic                                                       |                   |
| Space group                       | P 21/n                                                           |                   |
| Unit cell dimensions              | a = 9.9178(2) Å                                                  | α = 90°.          |
|                                   | b = 25.0870(5) Å                                                 | β = 99.6680(10)°. |
|                                   | c = 18.0566(4) Å                                                 | γ = 90°.          |
| Volume                            | 4428.82(16) Å <sup>3</sup>                                       |                   |
| Z                                 | 8                                                                |                   |
| Density (calculated)              | 1.528 Mg/m <sup>3</sup>                                          |                   |
| Absorption coefficient            | 1.891 mm <sup>-1</sup>                                           |                   |
| F(000)                            | 2064                                                             |                   |
| Crystal size                      | 0.32 x 0.30 x 0.04 mm <sup>3</sup>                               |                   |
| Theta range for data collection   | 2.20 to 25.03°.                                                  |                   |
| Index ranges                      | -11 ≤ h ≤ 11, -29 ≤ k ≤ 29, -21 ≤ l ≤ 19                         |                   |
| Reflections collected             | 77253                                                            |                   |
| Independent reflections           | 7805 [R(int) = 0.0549]                                           |                   |
| Completeness to theta = 25.03°    | 99.7 %                                                           |                   |
| Absorption correction             | multi-scan                                                       |                   |
| Max. and min. transmission        | 0.9282 and 0.5829                                                |                   |
| Refinement method                 | Full-matrix least-squares on F <sup>2</sup>                      |                   |
| Data / restraints / parameters    | 7805 / 0 / 613                                                   |                   |
| Goodness-of-fit on F <sup>2</sup> | 0.994                                                            |                   |
| Final R indices [I > 2σ(I)]       | R1 = 0.0326, wR2 = 0.0822                                        |                   |
| R indices (all data)              | R1 = 0.0465, wR2 = 0.0900                                        |                   |
| Largest diff. peak and hole       | 0.312 and -0.461 e.Å <sup>-3</sup>                               |                   |

f) **7ak** (CCDC no. 2009645): The thermal ellipsoid drawn at 60% probability level.

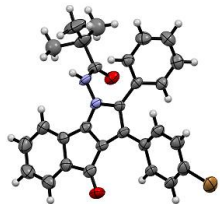

The purified compound **7ak** is dissolved in a mixed solvent of CH<sub>2</sub>Cl<sub>2</sub> and hexanes to slowly evaporate. After few days, colorless crystals were obtained.

|                                   |                                                                  |                    |
|-----------------------------------|------------------------------------------------------------------|--------------------|
| Empirical formula                 | C <sub>28</sub> H <sub>23</sub> Br N <sub>2</sub> O <sub>2</sub> |                    |
| Formula weight                    | 499.39                                                           |                    |
| Temperature                       | 200(2) K                                                         |                    |
| Wavelength                        | 0.71073 Å                                                        |                    |
| Crystal system                    | Monoclinic                                                       |                    |
| Space group                       | C c                                                              |                    |
| Unit cell dimensions              | a = 17.2881(7) Å                                                 | α = 90°.           |
|                                   | b = 16.3136(7) Å                                                 | β = 113.2390(10)°. |
|                                   | c = 9.3609(4) Å                                                  | γ = 90°.           |
| Volume                            | 2425.87(18) Å <sup>3</sup>                                       |                    |
| Z                                 | 4                                                                |                    |
| Density (calculated)              | 1.367 Mg/m <sup>3</sup>                                          |                    |
| Absorption coefficient            | 1.722 mm <sup>-1</sup>                                           |                    |
| F(000)                            | 1024                                                             |                    |
| Crystal size                      | 0.23 x 0.04 x 0.02 mm <sup>3</sup>                               |                    |
| Theta range for data collection   | 2.50 to 25.07°.                                                  |                    |
| Index ranges                      | -19 ≤ h ≤ 20, -19 ≤ k ≤ 19, -11 ≤ l ≤ 11                         |                    |
| Reflections collected             | 16214                                                            |                    |
| Independent reflections           | 4042 [R(int) = 0.0537]                                           |                    |
| Completeness to theta = 25.07°    | 99.8 %                                                           |                    |
| Absorption correction             | multi-scan                                                       |                    |
| Max. and min. transmission        | 0.9664 and 0.6929                                                |                    |
| Refinement method                 | Full-matrix least-squares on F <sup>2</sup>                      |                    |
| Data / restraints / parameters    | 4042 / 2 / 299                                                   |                    |
| Goodness-of-fit on F <sup>2</sup> | 0.996                                                            |                    |
| Final R indices [I > 2σ(I)]       | R1 = 0.0405, wR2 = 0.0834                                        |                    |
| R indices (all data)              | R1 = 0.0674, wR2 = 0.0949                                        |                    |
| Absolute structure parameter      | 0.001(10)                                                        |                    |
| Largest diff. peak and hole       | 0.370 and -0.322 e.Å <sup>-3</sup>                               |                    |

g) **7ik** (CCDC no. 2009646): The thermal ellipsoid drawn at 60% probability level.

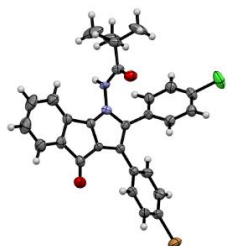

The purified compound **7ik** is dissolved in a mixed solvent of CH<sub>2</sub>Cl<sub>2</sub> and hexanes to slowly evaporate. After few days, colorless crystals were obtained.

|                                   |                                                                     |                  |
|-----------------------------------|---------------------------------------------------------------------|------------------|
| Empirical formula                 | C <sub>28</sub> H <sub>22</sub> Br Cl N <sub>2</sub> O <sub>2</sub> |                  |
| Formula weight                    | 533.84                                                              |                  |
| Temperature                       | 200(2) K                                                            |                  |
| Wavelength                        | 0.71073 Å                                                           |                  |
| Crystal system                    | Monoclinic                                                          |                  |
| Space group                       | C c                                                                 |                  |
| Unit cell dimensions              | a = 17.544(5) Å                                                     | α = 90°.         |
|                                   | b = 16.528(4) Å                                                     | β = 113.870(7)°. |
|                                   | c = 9.324(3) Å                                                      | γ = 90°.         |
| Volume                            | 2472.5(11) Å <sup>3</sup>                                           |                  |
| Z                                 | 4                                                                   |                  |
| Density (calculated)              | 1.434 Mg/m <sup>3</sup>                                             |                  |
| Absorption coefficient            | 1.799 mm <sup>-1</sup>                                              |                  |
| F(000)                            | 1088                                                                |                  |
| Crystal size                      | 0.15 x 0.06 x 0.03 mm <sup>3</sup>                                  |                  |
| Theta range for data collection   | 2.46 to 25.43°.                                                     |                  |
| Index ranges                      | -21 ≤ h ≤ 21, -19 ≤ k ≤ 19, -11 ≤ l ≤ 11                            |                  |
| Reflections collected             | 19037                                                               |                  |
| Independent reflections           | 4472 [R(int) = 0.0796]                                              |                  |
| Completeness to theta = 25.43°    | 99.6 %                                                              |                  |
| Absorption correction             | multi-scan                                                          |                  |
| Max. and min. transmission        | 0.9480 and 0.7742                                                   |                  |
| Refinement method                 | Full-matrix least-squares on F <sup>2</sup>                         |                  |
| Data / restraints / parameters    | 4472 / 2 / 310                                                      |                  |
| Goodness-of-fit on F <sup>2</sup> | 0.994                                                               |                  |
| Final R indices [I > 2σ(I)]       | R1 = 0.0434, wR2 = 0.0899                                           |                  |
| R indices (all data)              | R1 = 0.0751, wR2 = 0.1008                                           |                  |
| Absolute structure parameter      | 0.015(9)                                                            |                  |
| Largest diff. peak and hole       | 0.435 and -0.378 e.Å <sup>-3</sup>                                  |                  |

h) **8aa** (CCDC no. 2009650): The thermal ellipsoid drawn at 60% probability level.

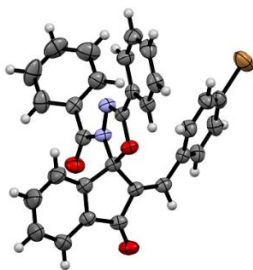

The purified compound **8aa** is dissolved in a mixed solvent of CH<sub>2</sub>Cl<sub>2</sub> and hexanes to slowly evaporate. After few days, colorless crystals were obtained.

|                                   |                                                                  |                 |
|-----------------------------------|------------------------------------------------------------------|-----------------|
| Empirical formula                 | C <sub>30</sub> H <sub>19</sub> Br N <sub>2</sub> O <sub>3</sub> |                 |
| Formula weight                    | 535.38                                                           |                 |
| Temperature                       | 200(2) K                                                         |                 |
| Wavelength                        | 0.71073 Å                                                        |                 |
| Crystal system                    | Triclinic                                                        |                 |
| Space group                       | P -1                                                             |                 |
| Unit cell dimensions              | a = 8.3291(7) Å                                                  | α = 79.558(2)°. |
|                                   | b = 9.2178(7) Å                                                  | β = 87.777(3)°. |
|                                   | c = 16.6899(15) Å                                                | γ = 74.713(2)°. |
| Volume                            | 1215.52(18) Å <sup>3</sup>                                       |                 |
| Z                                 | 2                                                                |                 |
| Density (calculated)              | 1.463 Mg/m <sup>3</sup>                                          |                 |
| Absorption coefficient            | 1.727 mm <sup>-1</sup>                                           |                 |
| F(000)                            | 544                                                              |                 |
| Crystal size                      | 0.77 x 0.58 x 0.17 mm <sup>3</sup>                               |                 |
| Theta range for data collection   | 2.44 to 25.09°.                                                  |                 |
| Index ranges                      | -9<=h<=9, -10<=k<=10, -19<=l<=19                                 |                 |
| Reflections collected             | 35541                                                            |                 |
| Independent reflections           | 4276 [R(int) = 0.0797]                                           |                 |
| Completeness to theta = 25.09°    | 99.2 %                                                           |                 |
| Absorption correction             | multi-scan                                                       |                 |
| Max. and min. transmission        | 0.7579 and 0.3499                                                |                 |
| Refinement method                 | Full-matrix least-squares on F <sup>2</sup>                      |                 |
| Data / restraints / parameters    | 4276 / 0 / 325                                                   |                 |
| Goodness-of-fit on F <sup>2</sup> | 1.001                                                            |                 |
| Final R indices [I>2sigma(I)]     | R1 = 0.0378, wR2 = 0.0978                                        |                 |
| R indices (all data)              | R1 = 0.0450, wR2 = 0.1037                                        |                 |
| Largest diff. peak and hole       | 0.489 and -0.638 e.Å <sup>-3</sup>                               |                 |

i) **8ak** (CCDC no. 2019535): The thermal ellipsoid drawn at 60% probability level.

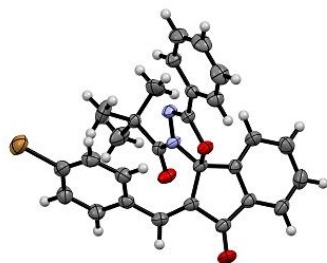

The purified compound **8ak** is dissolved in a mixed solvent of CH<sub>2</sub>Cl<sub>2</sub> and hexanes to slowly evaporate. After few days, colorless crystals were obtained.

|                                   |                                                                  |                 |
|-----------------------------------|------------------------------------------------------------------|-----------------|
| Empirical formula                 | C <sub>28</sub> H <sub>23</sub> Br N <sub>2</sub> O <sub>3</sub> |                 |
| Formula weight                    | 515.39                                                           |                 |
| Temperature                       | 200(2) K                                                         |                 |
| Wavelength                        | 0.71073 Å                                                        |                 |
| Crystal system                    | Triclinic                                                        |                 |
| Space group                       | P -1                                                             |                 |
| Unit cell dimensions              | a = 9.7575(13) Å                                                 | α = 70.686(3)°. |
|                                   | b = 10.9781(14) Å                                                | β = 73.323(3)°. |
|                                   | c = 12.4931(14) Å                                                | γ = 72.669(3)°. |
| Volume                            | 1178.9(3) Å <sup>3</sup>                                         |                 |
| Z                                 | 2                                                                |                 |
| Density (calculated)              | 1.452 Mg/m <sup>3</sup>                                          |                 |
| Absorption coefficient            | 1.777 mm <sup>-1</sup>                                           |                 |
| F(000)                            | 528                                                              |                 |
| Crystal size                      | 0.44 x 0.38 x 0.19 mm <sup>3</sup>                               |                 |
| Theta range for data collection   | 2.24 to 25.20°.                                                  |                 |
| Index ranges                      | -11 ≤ h ≤ 11, -13 ≤ k ≤ 13, -14 ≤ l ≤ 14                         |                 |
| Reflections collected             | 33847                                                            |                 |
| Independent reflections           | 4196 [R(int) = 0.0471]                                           |                 |
| Completeness to theta = 25.20°    | 98.9 %                                                           |                 |
| Absorption correction             | multi-scan                                                       |                 |
| Max. and min. transmission        | 0.7289 and 0.5086                                                |                 |
| Refinement method                 | Full-matrix least-squares on F <sup>2</sup>                      |                 |
| Data / restraints / parameters    | 4196 / 0 / 310                                                   |                 |
| Goodness-of-fit on F <sup>2</sup> | 1.004                                                            |                 |
| Final R indices [I > 2σ(I)]       | R1 = 0.0305, wR2 = 0.0797                                        |                 |
| R indices (all data)              | R1 = 0.0375, wR2 = 0.0841                                        |                 |
| Largest diff. peak and hole       | 0.340 and -0.535 e.Å <sup>-3</sup>                               |                 |

**VIII.  $^1\text{H}$  NMR,  $^{13}\text{C}$  NMR,  $^{31}\text{P}$  NMR and  $^{19}\text{F}$  NMR spectra of all new compounds:**

**$^1\text{H}$  NMR Spectrum of **1a** (DMSO- $d_6$ , 400 MHz)**

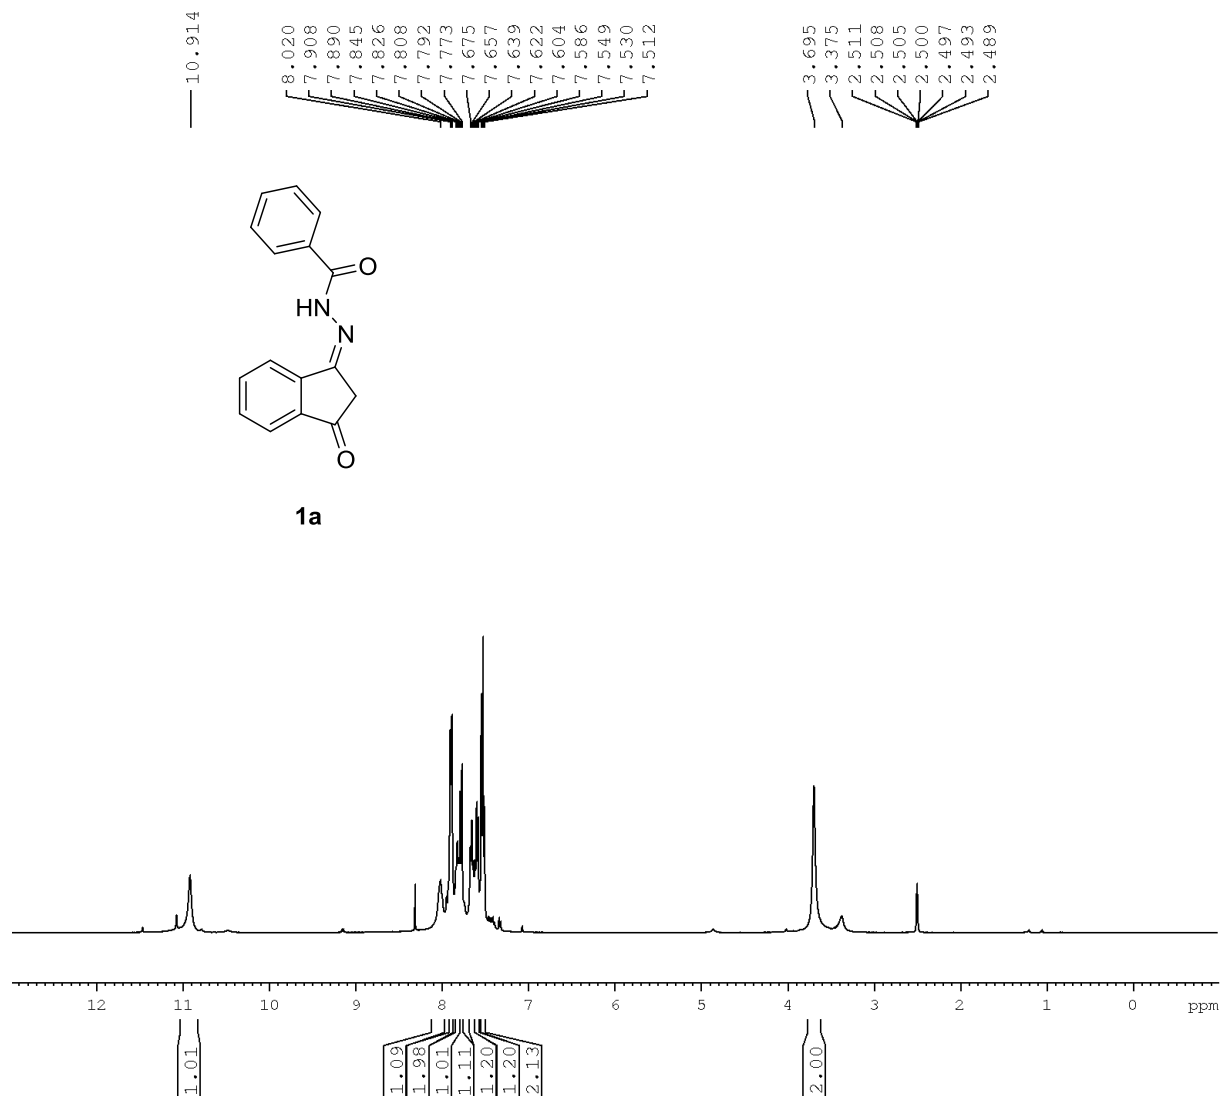

Current Data Parameters  
 NAME SW 909-1  
 EXPNO 1  
 PROCNO 1

F2 - Acquisition Parameters  
 Date\_ 20200616  
 Time 10.24  
 INSTRUM spect  
 PROBHD 5 mm PABBO BB/  
 PULPROG zg30  
 TD 32768  
 SOLVENT DMSO  
 NS 64  
 DS 0  
 SWH 7211.539 Hz  
 FIDRES 0.220079 Hz  
 AQ 2.2719147 sec  
 RG 63.58  
 DW 69.333 usec  
 DE 10.06 usec  
 TE 298.5 K  
 D1 2.0000000 sec  
 TD0 1

==== CHANNEL f1 =====  
 SFO1 400.1324008 MHz  
 NUC1 1H  
 P1 15.00 usec  
 PLW1 11.39999962 W

F2 - Processing parameters  
 SI 16384  
 SF 400.1300032 MHz  
 WDW EM  
 SSB 0  
 LB 0 Hz  
 GB 0  
 PC 1.00

<sup>13</sup>C NMR Spectrum of **1a** (DMSO-d<sub>6</sub>, 100 MHz)

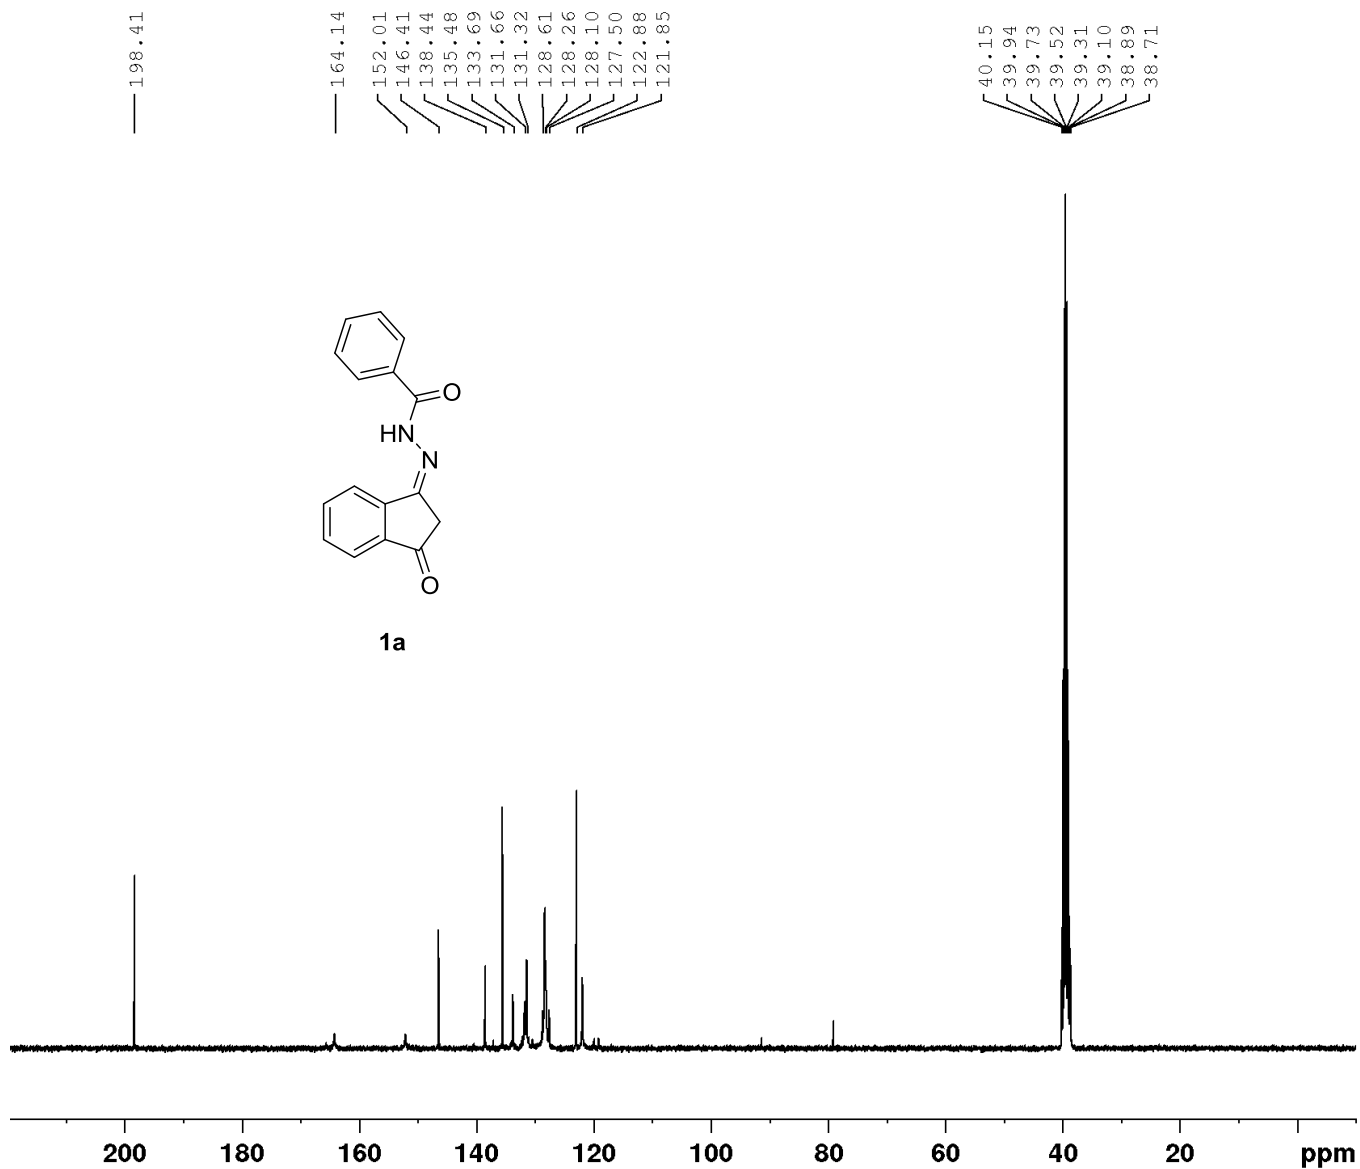

Current Data Parameters  
NAME SW 909  
EXPNO 3  
PROCNO 1

F2 - Acquisition Parameters  
Date\_ 20200615  
Time 22.10  
INSTRUM spect  
PROBHD 5 mm BBO BB-1H  
PULPROG zgpg30  
TD 32768  
SOLVENT DMSO  
NS 3252  
DS 0  
SWH 24038.461 Hz  
FIDRES 0.733596 Hz  
AQ 0.6815744 sec  
RG 5792.6  
DW 20.800 usec  
DE 6.50 usec  
TE 297.9 K  
D1 2.00000000 sec  
D11 0.03000000 sec  
TD0 1

===== CHANNEL f1 =====  
NUC1 13C  
P1 10.00 usec  
PL1 3.80 dB  
SFO1 100.6233325 MHz

===== CHANNEL f2 =====  
CPDPRG[2] waltz16  
NUC2 1H  
PCPD2 90.00 usec  
PL2 10.20 dB  
PL12 26.00 dB  
PL13 29.00 dB  
SFO2 400.1316005 MHz

F2 - Processing parameters  
SI 32768  
SF 100.6128214 MHz  
WDW EM  
SSB 0  
LB 1.00 Hz  
GB 0  
PC 1.00



<sup>1</sup>H NMR Spectrum of 1i (DMSO-d<sub>6</sub>, 400 MHz)

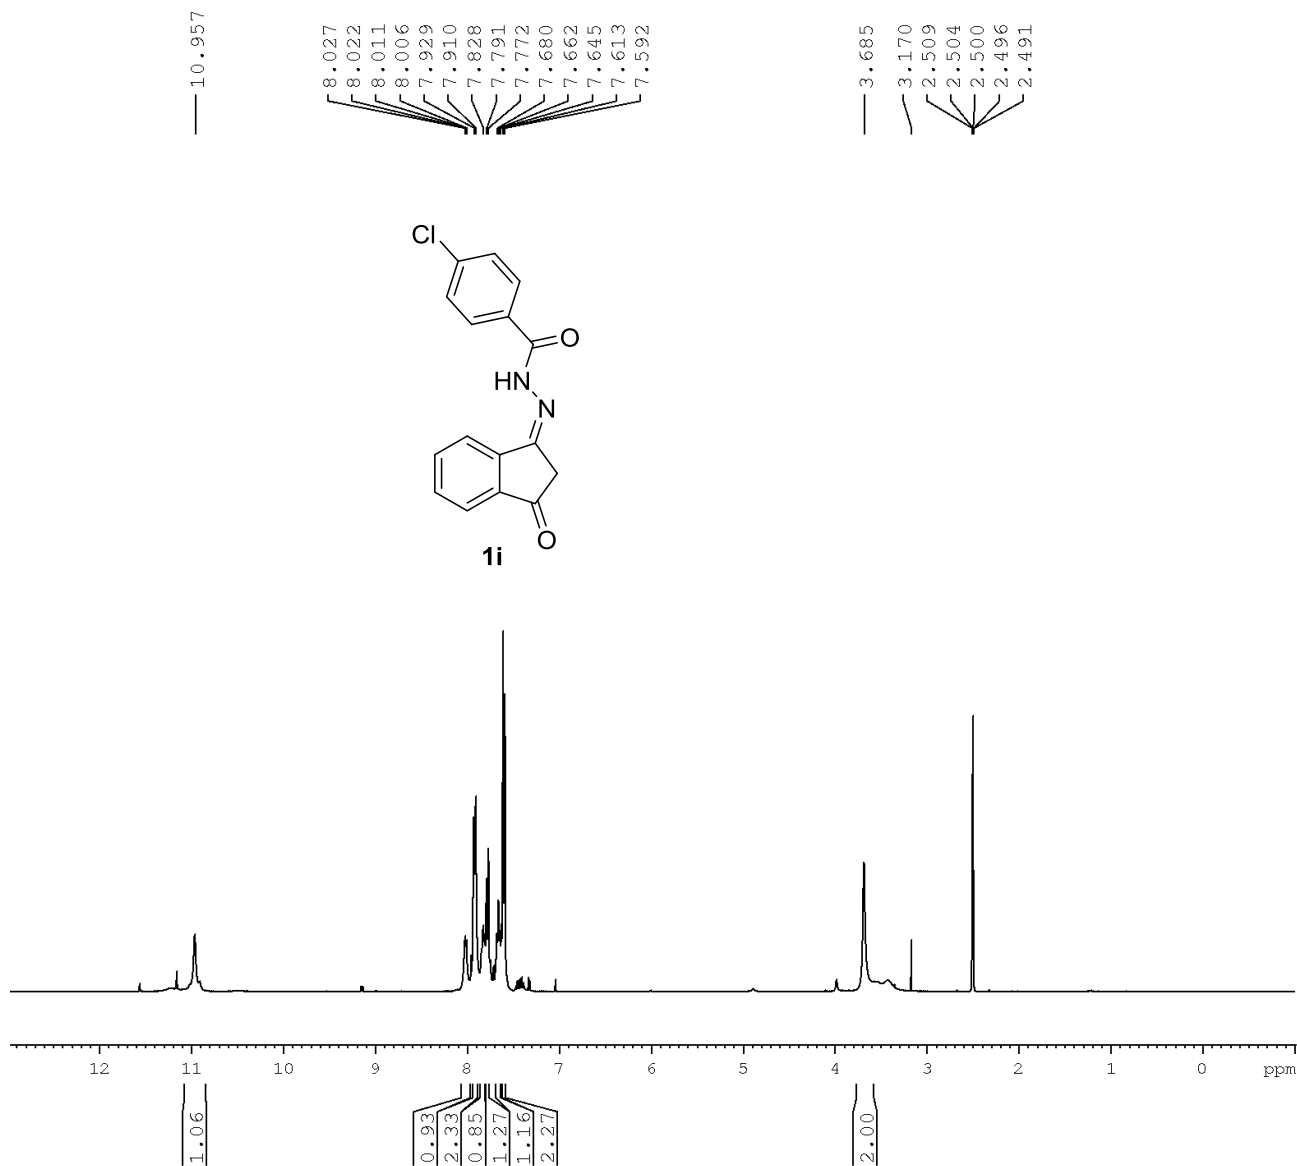

Current Data Parameters  
 NAME SW 916-1  
 EXPNO 1  
 PROCNO 1

F2 - Acquisition Parameters  
 Date\_ 20200721  
 Time 11.33  
 INSTRUM spect  
 PROBHD 5 mm PABBO BB/  
 PULPROG zg30  
 TD 32768  
 SOLVENT DMSO  
 NS 32  
 DS 0  
 SWH 7211.539 Hz  
 FIDRES 0.220079 Hz  
 AQ 2.2719147 sec  
 RG 78.51  
 DW 69.333 usec  
 DE 10.06 usec  
 TE 295.9 K  
 D1 2.00000000 sec  
 TDO 1

==== CHANNEL f1 =====  
 SF01 400.1324008 MHz  
 NUC1 1H  
 P1 15.00 usec  
 PLW1 11.39999962 W

F2 - Processing parameters  
 SI 16384  
 SF 400.1300028 MHz  
 WDW EM  
 SSB 0  
 LB 0 Hz  
 GB 0  
 PC 1.00

<sup>13</sup>C NMR Spectrum of **1i** (DMSO-d<sub>6</sub>, 100 MHz)

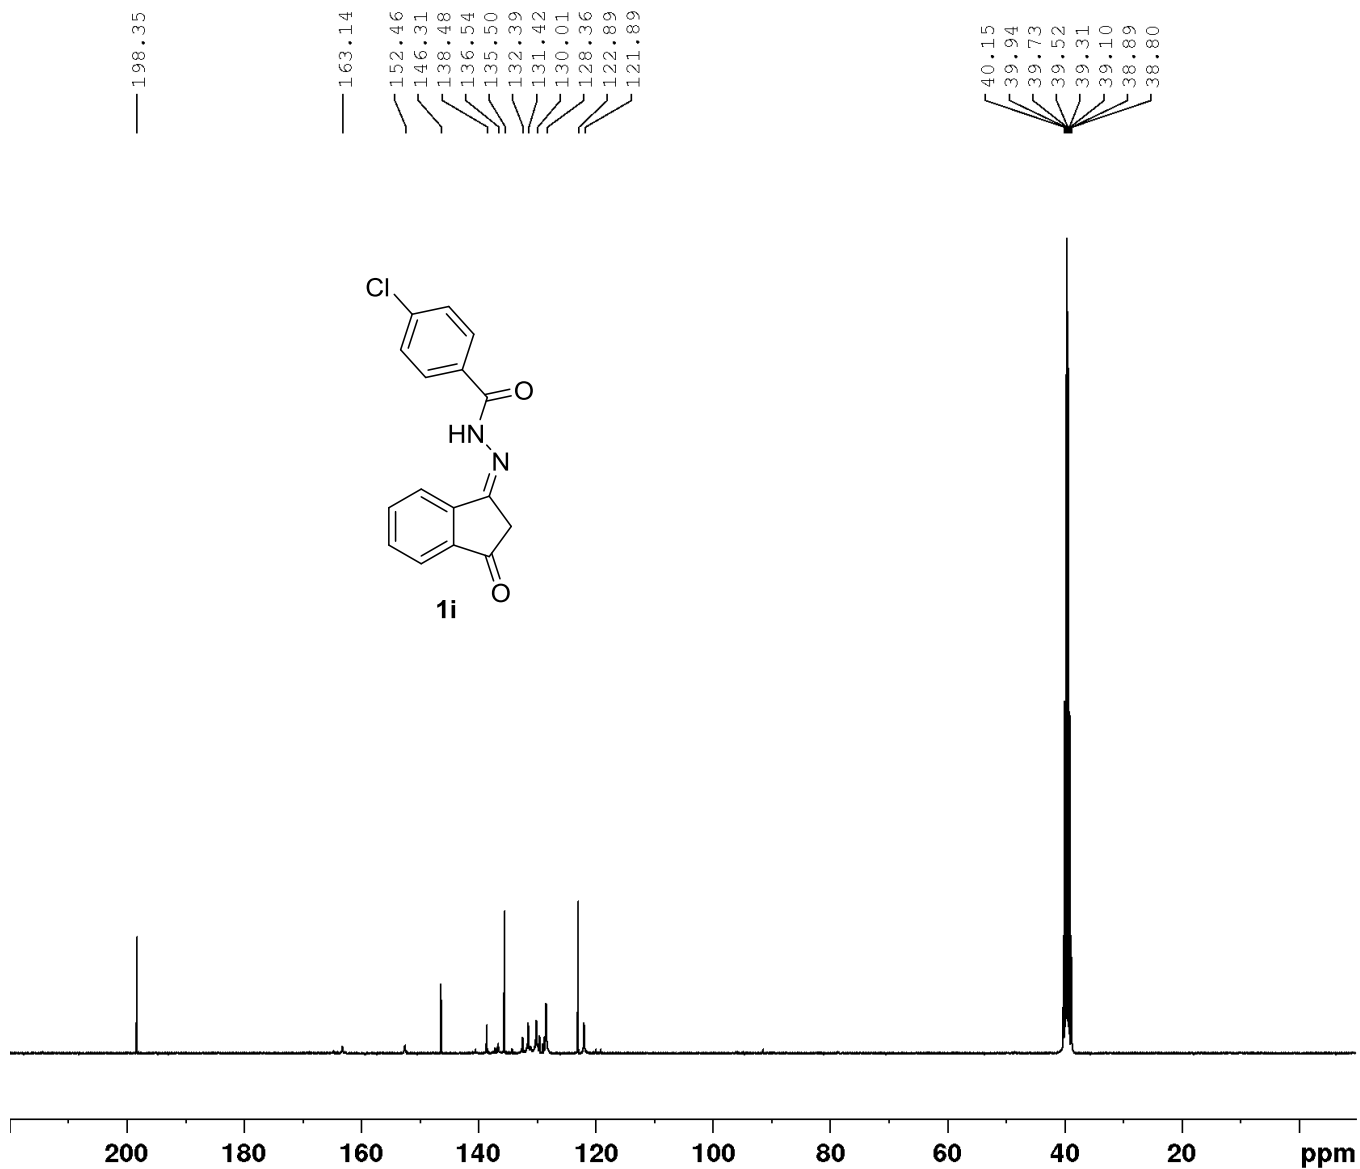

Current Data Parameters  
 NAME SW 916  
 EXPNO 3  
 PROCNO 1

F2 - Acquisition Parameters  
 Date\_ 20200720  
 Time 23.18  
 INSTRUM spect  
 PROBHD 5 mm BBO BB-1H  
 PULPROG zgpg30  
 TD 32768  
 SOLVENT DMSO  
 NS 12000  
 DS 0  
 SWH 24038.461 Hz  
 FIDRES 0.733596 Hz  
 AQ 0.6815744 sec  
 RG 4096  
 DW 20.800 usec  
 DE 6.50 usec  
 TE 297.5 K  
 D1 2.00000000 sec  
 D11 0.03000000 sec  
 TD0 1

==== CHANNEL f1 =====  
 NUC1 13C  
 P1 10.00 usec  
 PL1 3.80 dB  
 SFO1 100.6233325 MHz

==== CHANNEL f2 =====  
 CPDPRG[2] waltz16  
 NUC2 1H  
 PCPD2 90.00 usec  
 PL2 10.20 dB  
 PL12 26.00 dB  
 PL13 29.00 dB  
 SFO2 400.1316005 MHz

F2 - Processing parameters  
 SI 32768  
 SF 100.6128195 MHz  
 WDW EM  
 SSB 0  
 LB 1.00 Hz  
 GB 0  
 PC 1.00

<sup>1</sup>H NMR Spectrum of 1j (DMSO-d<sub>6</sub>, 400 MHz)

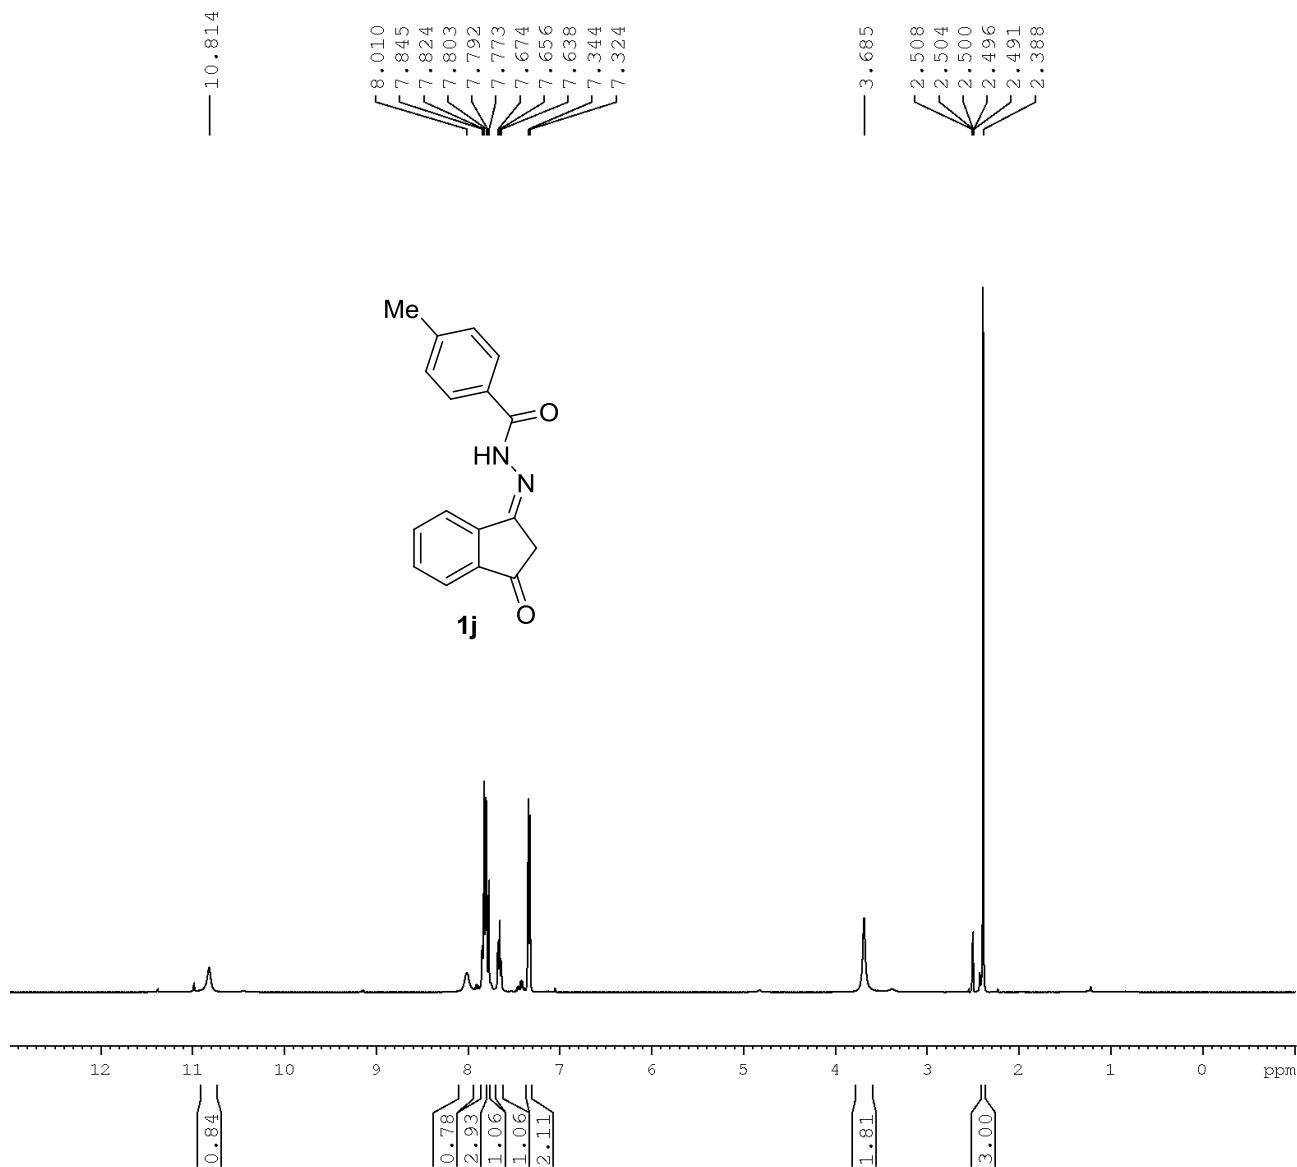

Current Data Parameters  
NAME 485  
EXPNO 3  
PROCNO 1

F2 - Acquisition Parameters  
Date\_ 20200614  
Time 17.13  
INSTRUM spect  
PROBHD 5 mm BBO BB-1H  
PULPROG zg30  
TD 32768  
SOLVENT DMSO  
NS 16  
DS 0  
SWH 7246.377 Hz  
FIDRES 0.221142 Hz  
AQ 2.2609921 sec  
RG 114  
DW 69.000 usec  
DE 6.50 usec  
TE 297.6 K  
D1 2.00000000 sec  
TDO 1

==== CHANNEL f1 =====  
NUC1 1H  
P1 15.00 usec  
PL1 11.10 dB  
SFO1 400.1324008 MHz

F2 - Processing parameters  
SI 16384  
SF 400.1300062 MHz  
WDW EM  
SSB 0  
LB 0 Hz  
GB 0  
PC 1.00

<sup>13</sup>C NMR Spectrum of **1j** (DMSO-d<sub>6</sub>, 100 MHz)

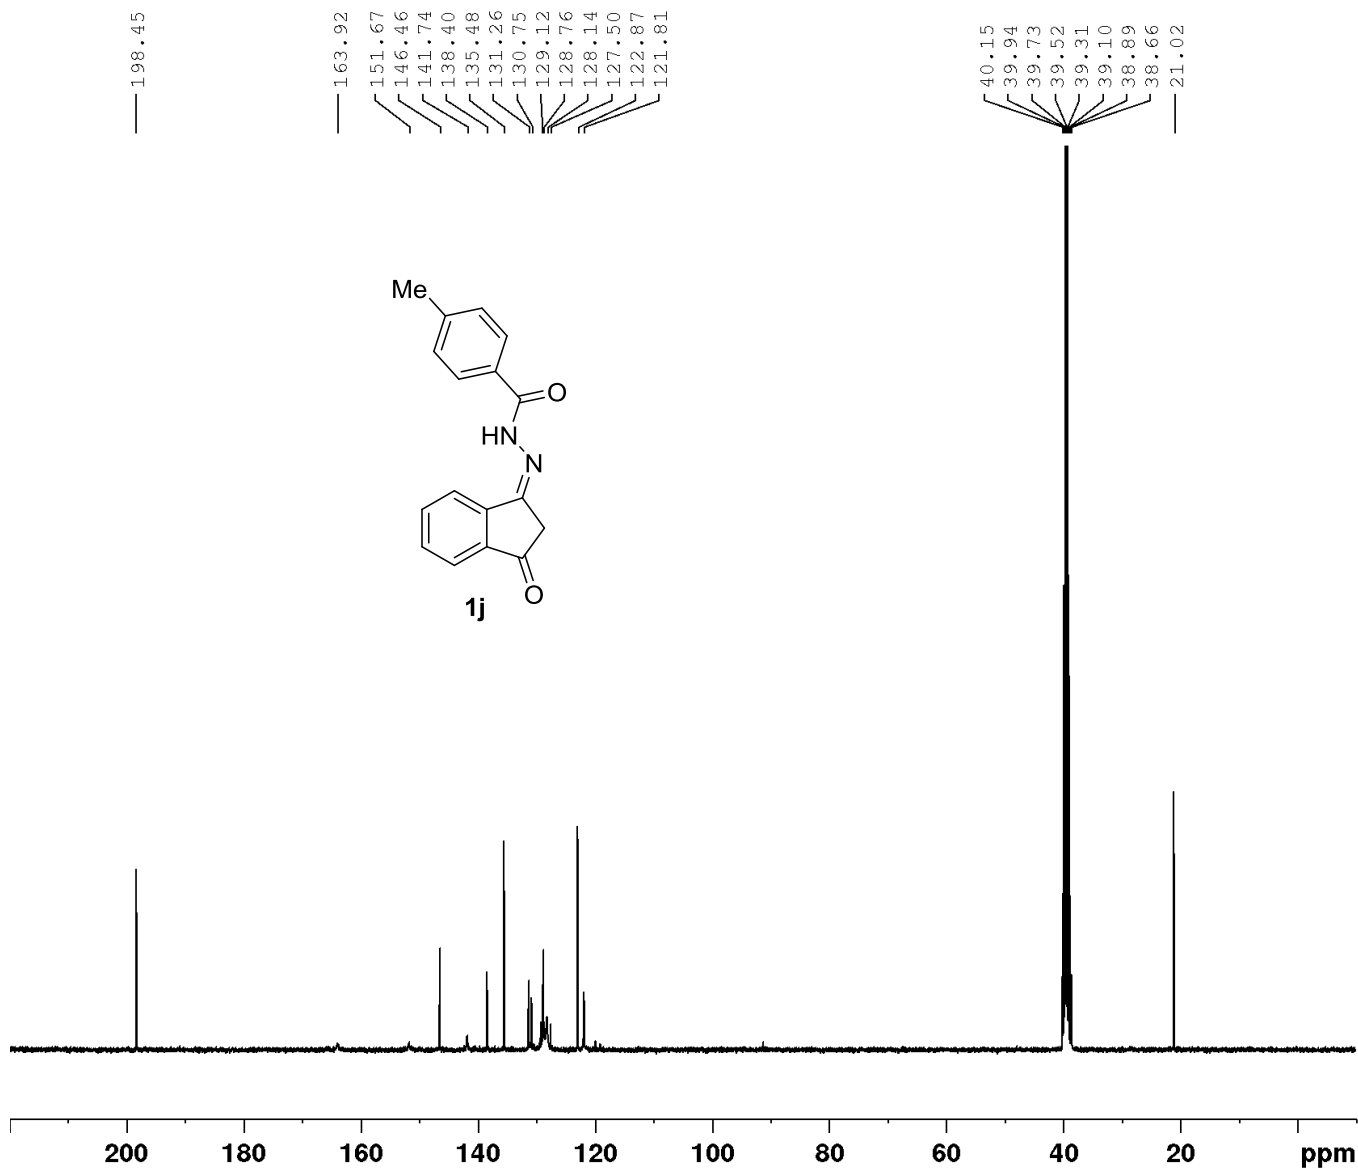

Current Data Parameters  
 NAME 485  
 EXPNO 4  
 PROCNO 1

F2 - Acquisition Parameters  
 Date\_ 20200614  
 Time 17.17  
 INSTRUM spect  
 PROBHD 5 mm BBO BB-1H  
 PULPROG zgpg30  
 TD 32768  
 SOLVENT DMSO  
 NS 3990  
 DS 0  
 SWH 24038.461 Hz  
 FIDRES 0.733596 Hz  
 AQ 0.6815744 sec  
 RG 8192  
 DW 20.800 usec  
 DE 6.50 usec  
 TE 297.7 K  
 D1 2.00000000 sec  
 D11 0.03000000 sec  
 TD0 1

===== CHANNEL f1 =====  
 NUC1 13C  
 P1 10.00 usec  
 PL1 3.80 dB  
 SFO1 100.6233325 MHz

===== CHANNEL f2 =====  
 CPDPRG[2] waltz16  
 NUC2 1H  
 PCPD2 90.00 usec  
 PL2 10.20 dB  
 PL12 26.00 dB  
 PL13 29.00 dB  
 SFO2 400.1316005 MHz

F2 - Processing parameters  
 SI 32768  
 SF 100.6128205 MHz  
 WDW EM  
 SSB 0  
 LB 1.00 Hz  
 GB 0  
 PC 1.00

<sup>1</sup>H NMR Spectrum of **3a** (CDCl<sub>3</sub>, 400 MHz)

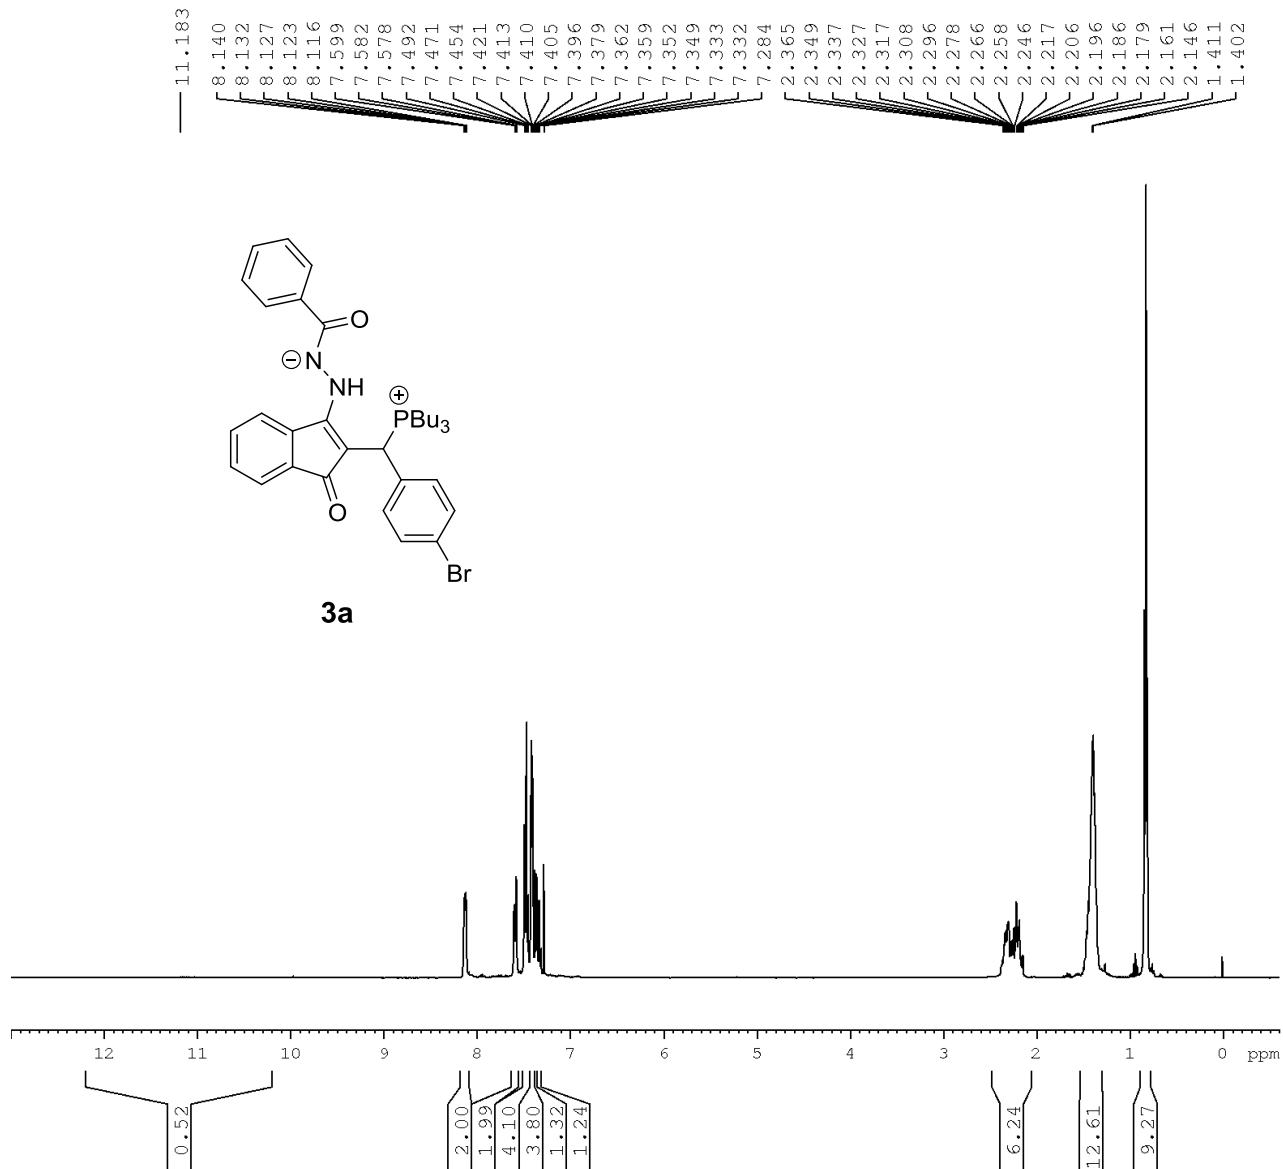

Current Data Parameters  
NAME SW 747-1  
EXPNO 2  
PROCNO 1

F2 - Acquisition Parameters  
Date\_ 20200526  
Time 19.59  
INSTRUM spect  
PROBHD 5 mm PABBO BB/  
PULPROG zg30  
TD 32768  
SOLVENT CDCl3  
NS 32  
DS 0  
SWH 7211.539 Hz  
FIDRES 0.220079 Hz  
AQ 2.2719147 sec  
RG 57.42  
DW 69.333 usec  
DE 10.06 usec  
TE 297.9 K  
D1 2.00000000 sec  
TDO 1

==== CHANNEL f1 =====  
SFO1 400.1324008 MHz  
NUC1 1H  
P1 15.00 usec  
PLW1 11.39999962 W

F2 - Processing parameters  
SI 16384  
SF 400.1300000 MHz  
WDW EM  
SSB 0  
LB 0 Hz  
GB 0  
PC 1.00

<sup>13</sup>C NMR Spectrum of 3a (CDCl<sub>3</sub>, 100 MHz)

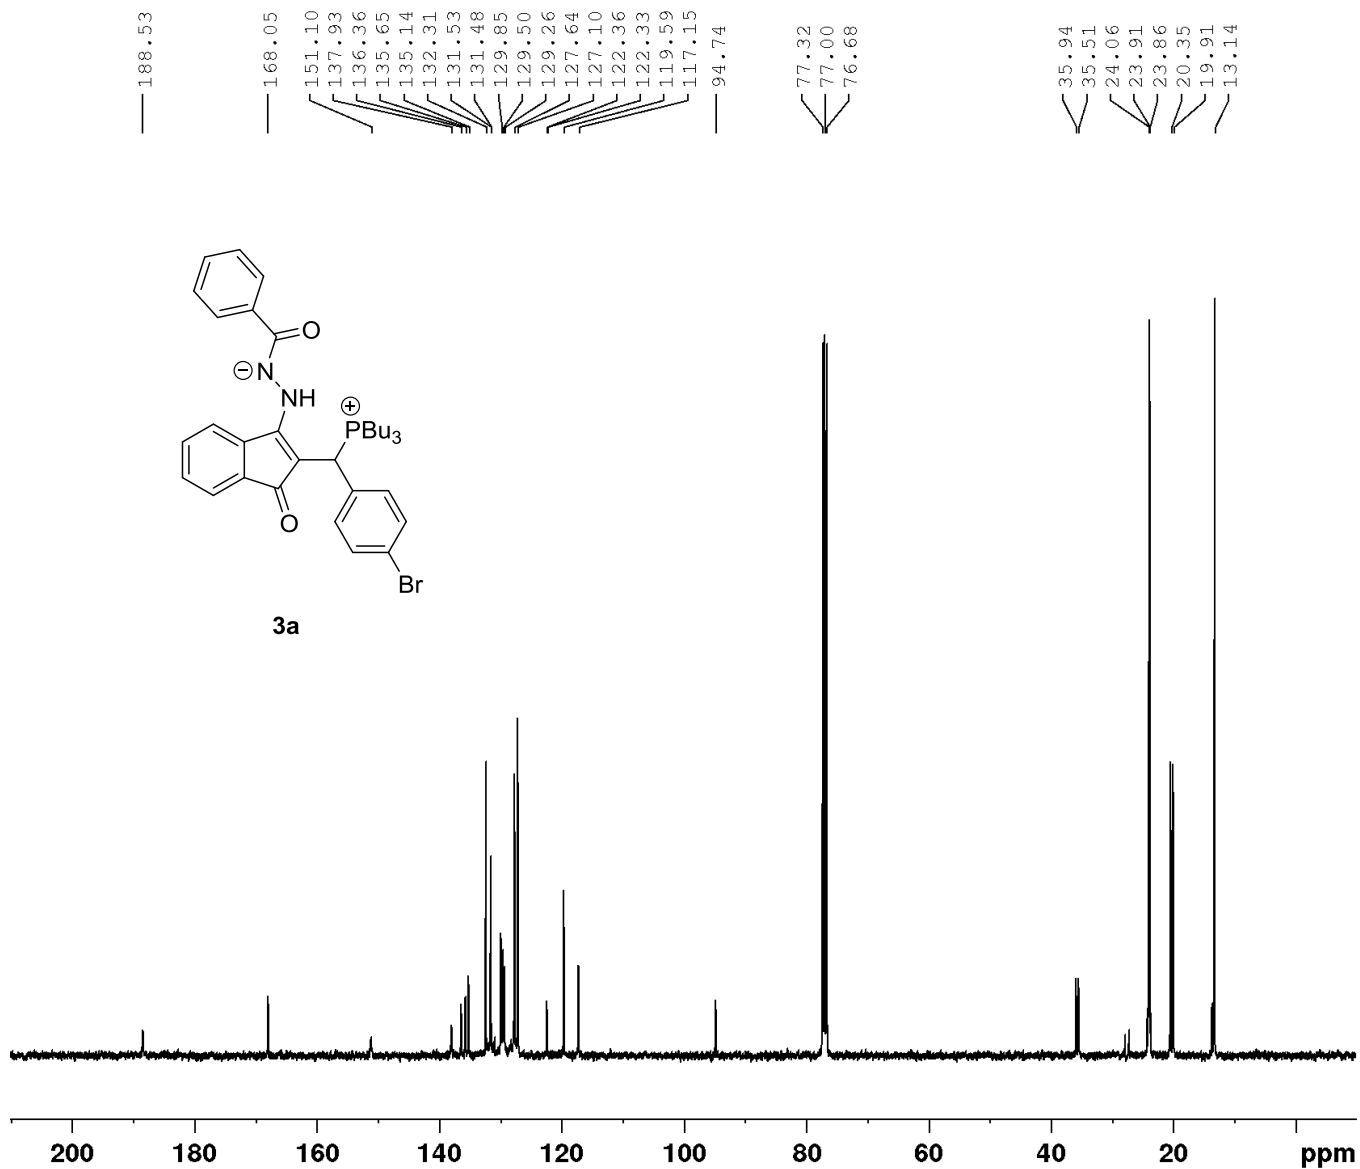

Current Data Parameters  
NAME SW 747-1  
EXPNO 4  
PROCNO 1

F2 - Acquisition Parameters  
Date\_ 20200527  
Time 23.26  
INSTRUM spect  
PROBHD 5 mm PABBO BB/  
PULPROG zgpg30  
TD 32768  
SOLVENT CDCl3  
NS 1660  
DS 0  
SWH 24038.461 Hz  
FIDRES 0.733596 Hz  
AQ 0.6815744 sec  
RG 198.09  
DW 20.800 usec  
DE 6.50 usec  
TE 298.5 K  
D1 2.00000000 sec  
D11 0.03000000 sec  
TD0 1

===== CHANNEL f1 =====  
SFO1 100.6228298 MHz  
NUC1 13C  
P1 10.00 usec  
PLW1 49.50000000 W

===== CHANNEL f2 =====  
SFO2 400.1316005 MHz  
NUC2 1H  
CPDPRG[2] waltz16  
PCPD2 90.00 usec  
PLW2 12.50000000 W  
PLW12 0.34722000 W  
PLW13 0.28125000 W

F2 - Processing parameters  
SI 32768  
SF 100.6127760 MHz  
WDW EM  
SSB 0  
LB 2.00 Hz  
GB 0  
PC 1.00

<sup>31</sup>P NMR Spectrum of **3a** (CDCl<sub>3</sub>, 162 MHz)

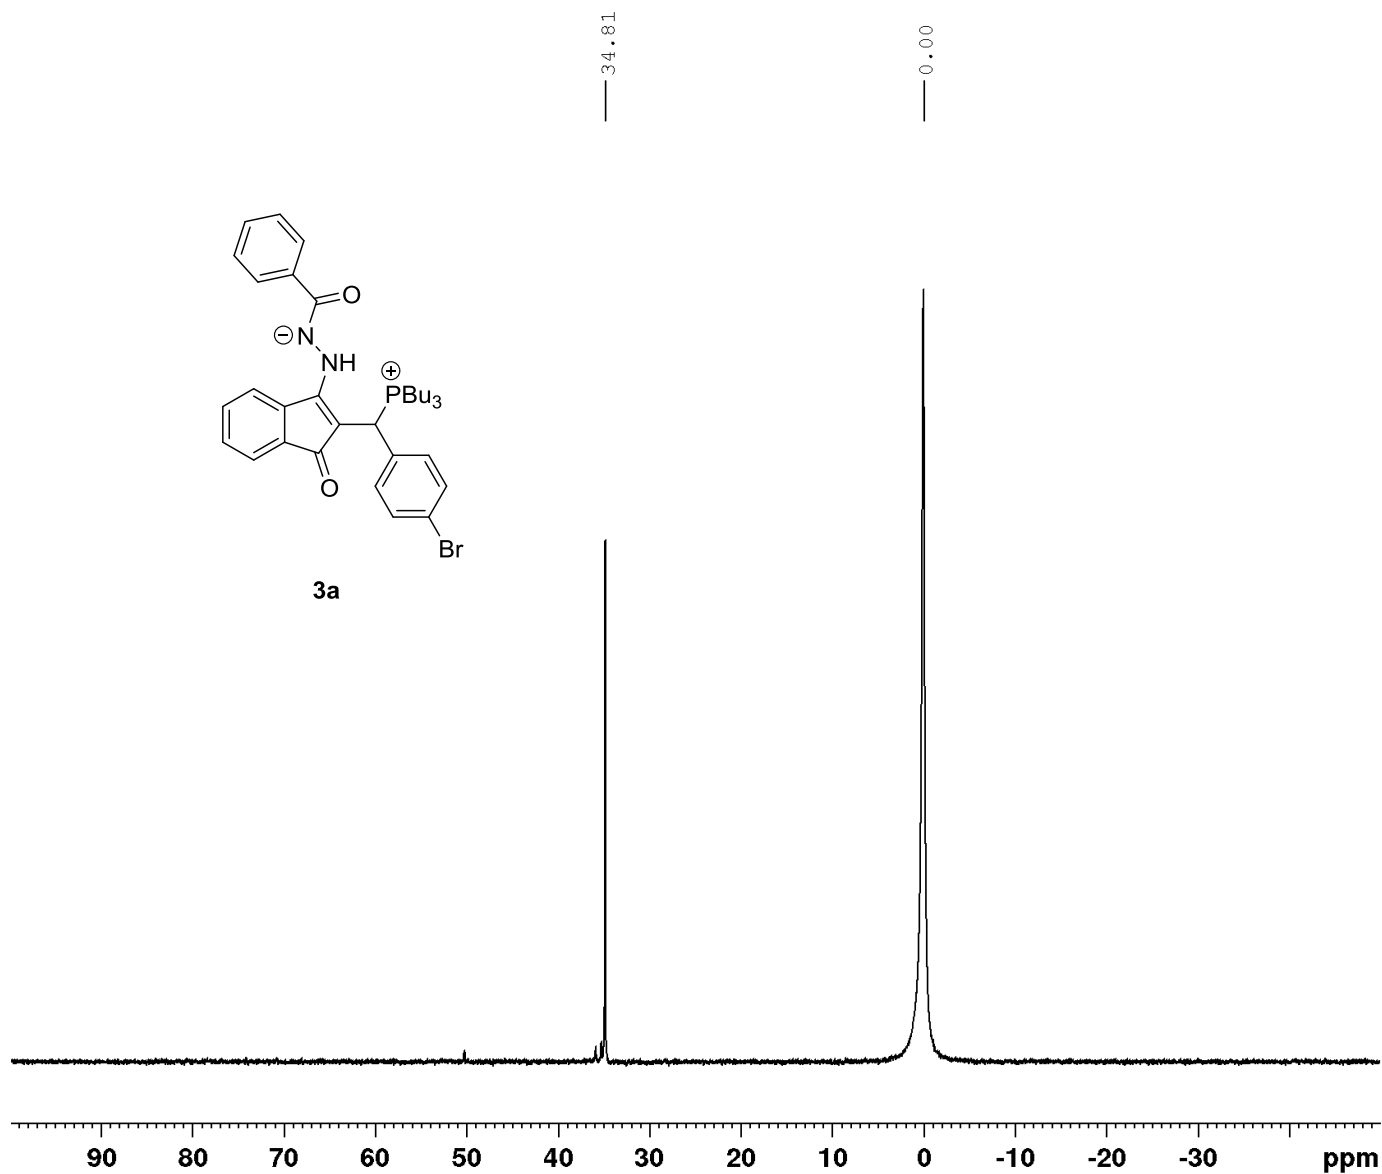

Current Data Parameters  
NAME SW 747-1  
EXPNO 5  
PROCNO 1

F2 - Acquisition Parameters  
Date\_ 20200615  
Time 11.46  
INSTRUM spect  
PROBHD 5 mm PABBO BB/  
PULPROG zgpg30  
TD 65536  
SOLVENT CDCl3  
NS 16  
DS 4  
SWH 49019.609 Hz  
FIDRES 0.747980 Hz  
AQ 0.6684672 sec  
RG 198.09  
DW 10.200 usec  
DE 6.50 usec  
TE 296.5 K  
D1 2.00000000 sec  
D11 0.03000000 sec  
TDO 1

===== CHANNEL f1 =====  
SFO1 161.9836917 MHz  
NUC1 31P  
P1 15.00 usec  
PLW1 13.19999981 W

===== CHANNEL f2 =====  
SFO2 400.1316005 MHz  
NUC2 1H  
CPDPRG[2] waltz16  
PCPD2 90.00 usec  
PLW2 12.50000000 W  
PLW12 0.34722000 W  
PLW13 0.28125000 W

F2 - Processing parameters  
SI 32768  
SF 161.9755119 MHz  
WDW EM  
SSB 0  
LB 2.00 Hz  
GB 0  
PC 1.40

<sup>1</sup>H NMR Spectrum of **3b** (CDCl<sub>3</sub>, 400 MHz)

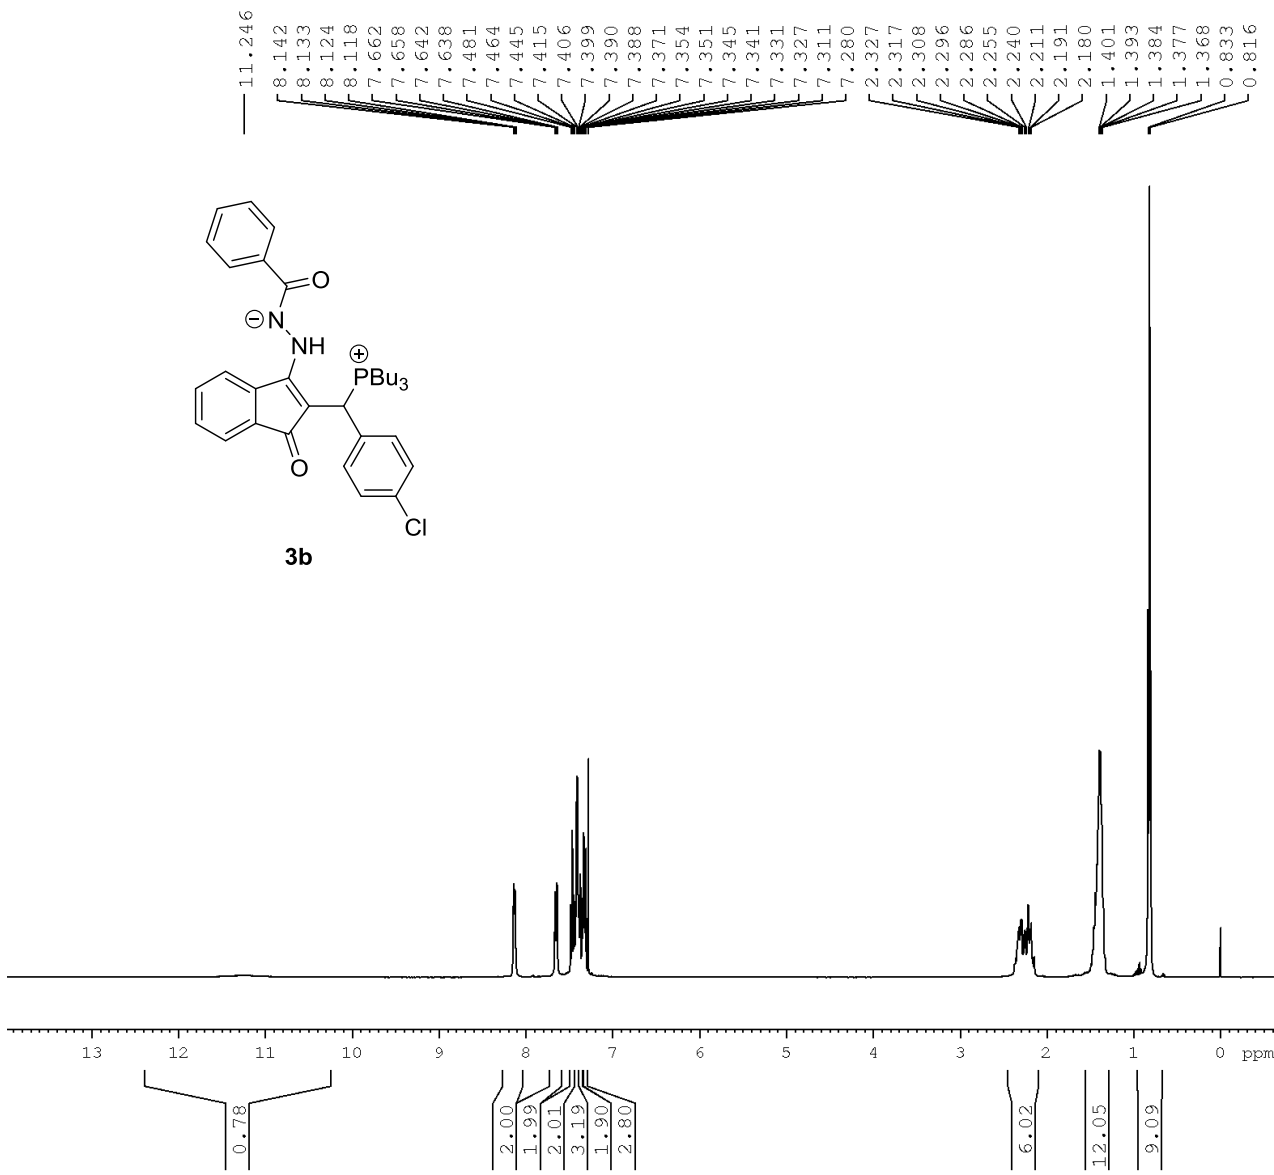

Current Data Parameters  
 NAME SW 893-1  
 EXPNO 2  
 PROCNO 1

F2 - Acquisition Parameters  
 Date\_ 20200531  
 Time 22.03  
 INSTRUM spect  
 PROBHD 5 mm PABBO BB/  
 PULPROG zg30  
 TD 32768  
 SOLVENT CDCl3  
 NS 32  
 DS 0  
 SWH 7211.539 Hz  
 FIDRES 0.220079 Hz  
 AQ 2.2719147 sec  
 RG 45.15  
 DW 69.333 usec  
 DE 10.06 usec  
 TE 298.1 K  
 D1 2.00000000 sec  
 TD0 1

===== CHANNEL f1 =====  
 SFO1 400.1324008 MHz  
 NUC1 1H  
 P1 15.00 usec  
 PLW1 11.39999962 W

F2 - Processing parameters  
 SI 16384  
 SF 400.1300017 MHz  
 WDW EM  
 SSB 0  
 LB 0 Hz  
 GB 0  
 PC 1.00



<sup>13</sup>C NMR Spectrum of **3b** (CDCl<sub>3</sub>, 100 MHz)

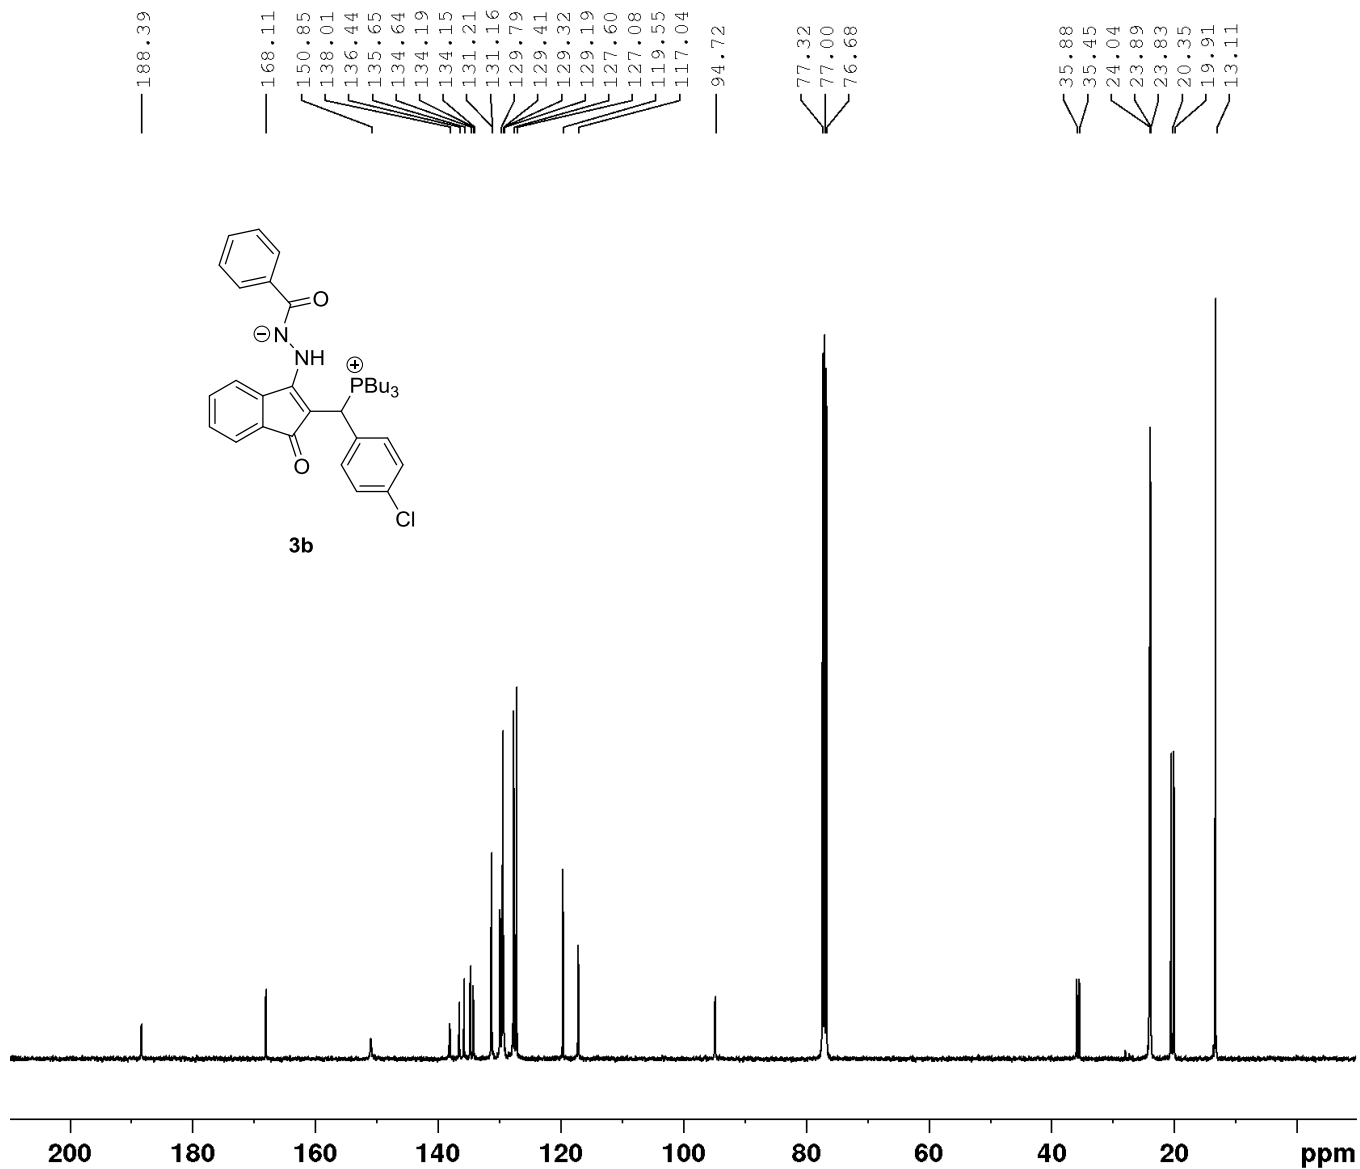

Current Data Parameters  
NAME SW 893-1  
EXPNO 3  
PROCNO 1

F2 - Acquisition Parameters  
Date\_ 20200531  
Time 22.05  
INSTRUM spect  
PROBHD 5 mm PABBO BB/  
PULPROG zgpg30  
TD 32768  
SOLVENT CDCl3  
NS 3327  
DS 0  
SWH 24038.461 Hz  
FIDRES 0.733596 Hz  
AQ 0.6815744 sec  
RG 198.09  
DW 20.800 usec  
DE 6.50 usec  
TE 298.2 K  
D1 2.00000000 sec  
D11 0.03000000 sec  
TD0 1

===== CHANNEL f1 =====  
SFO1 100.6228298 MHz  
NUC1 13C  
P1 10.00 usec  
PLW1 49.50000000 W

===== CHANNEL f2 =====  
SFO2 400.1316005 MHz  
NUC2 1H  
CPDPRG[2] waltz16  
PCPD2 90.00 usec  
PLW2 12.50000000 W  
PLW12 0.34722000 W  
PLW13 0.28125000 W

F2 - Processing parameters  
SI 32768  
SF 100.6127774 MHz  
WDW EM  
SSB 0  
LB 2.00 Hz  
GB 0  
PC 1.00

<sup>31</sup>P NMR Spectrum of **3b** (CDCl<sub>3</sub>, 162 MHz)

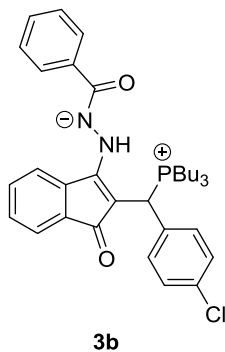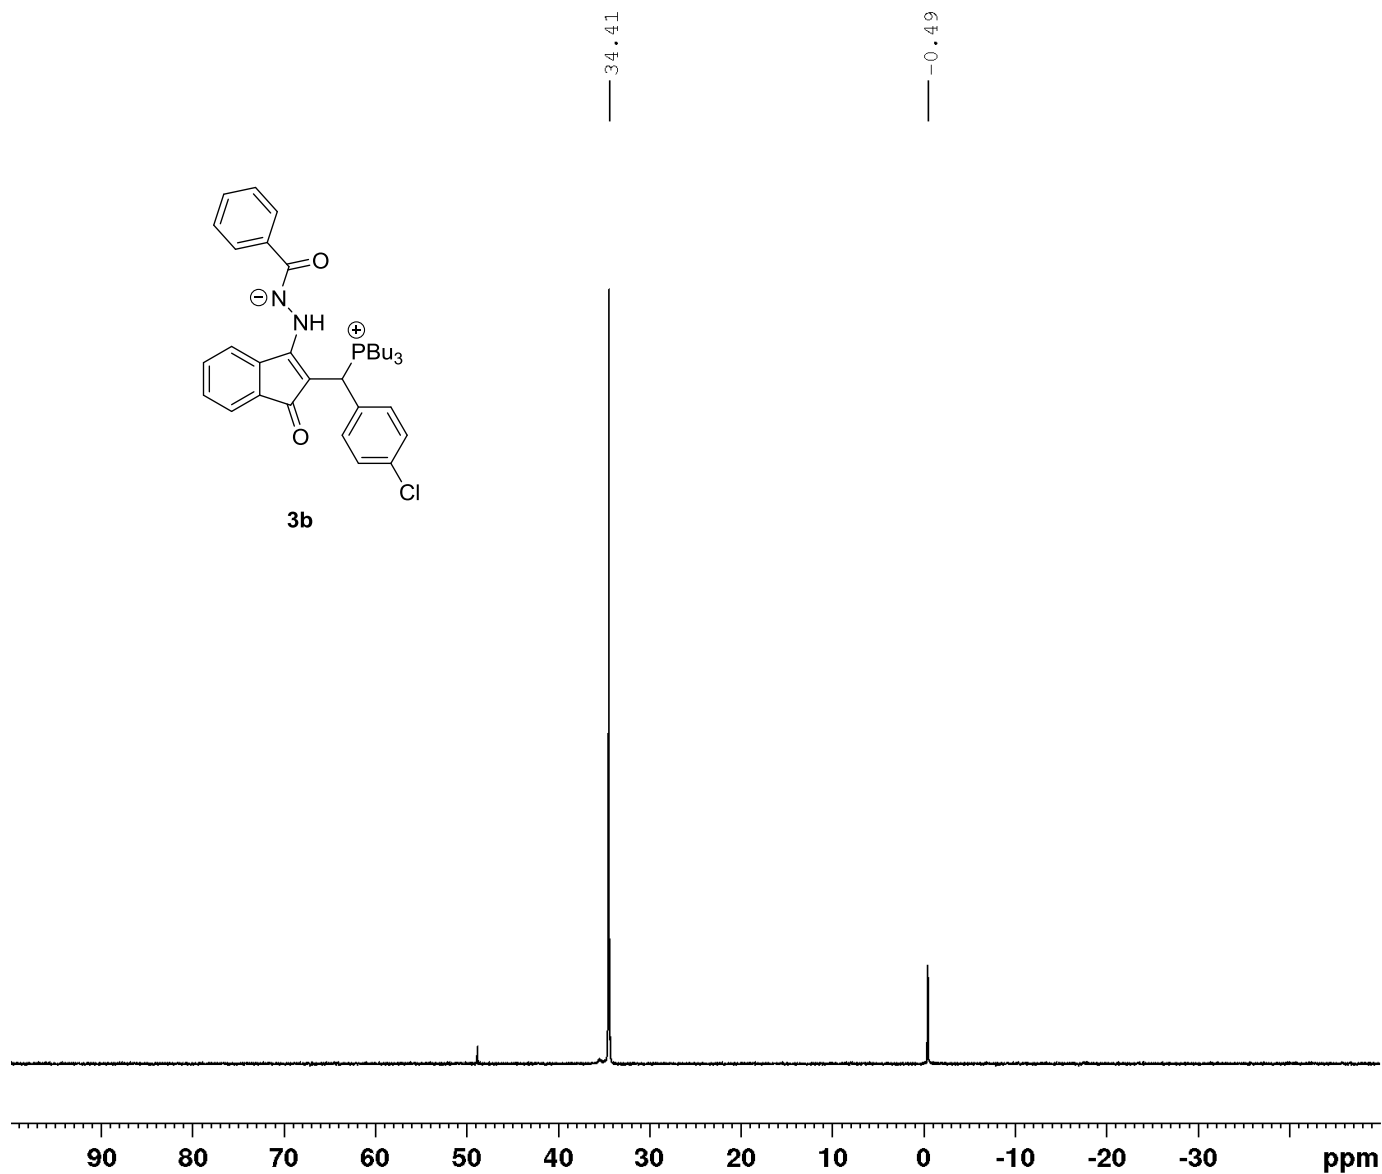

Current Data Parameters  
NAME SW 893-1  
EXPNO 4  
PROCNO 1

F2 - Acquisition Parameters  
Date\_ 20200601  
Time 11.44  
INSTRUM spect  
PROBHD 5 mm PABBO BB/  
PULPROG zgpg30  
TD 65536  
SOLVENT CDCl3  
NS 16  
DS 4  
SWH 49019.609 Hz  
FIDRES 0.747980 Hz  
AQ 0.6684672 sec  
RG 198.09  
DW 10.200 usec  
DE 6.50 usec  
TE 293.4 K  
D1 2.00000000 sec  
D11 0.03000000 sec  
TD0 1

==== CHANNEL f1 =====  
SFO1 161.9836917 MHz  
NUC1 31P  
P1 15.00 usec  
PLW1 13.19999981 W

==== CHANNEL f2 =====  
SFO2 400.1316005 MHz  
NUC2 1H  
CPDPRG[2] waltz16  
PCPD2 90.00 usec  
PLW2 12.50000000 W  
PLW12 0.34722000 W  
PLW13 0.28125000 W

F2 - Processing parameters  
SI 32768  
SF 161.9755930 MHz  
WDW EM  
SSB 0  
LB 2.00 Hz  
GB 0  
PC 1.40

<sup>1</sup>H NMR Spectrum of **3c** (CDCl<sub>3</sub>, 400 MHz)

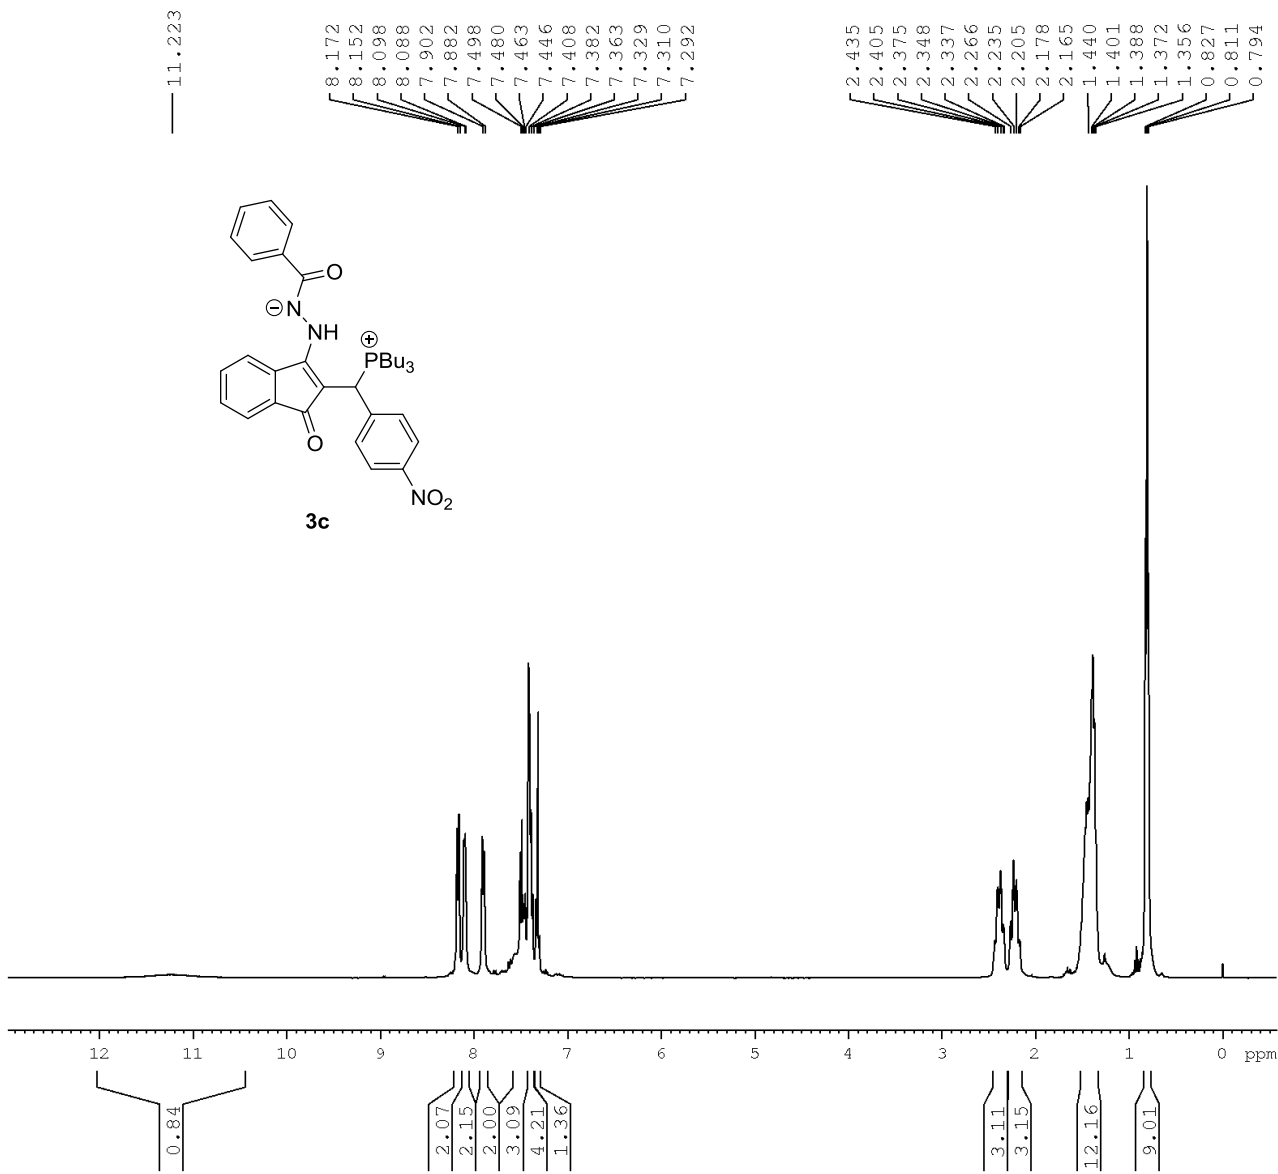

Current Data Parameters  
 NAME SW ZW 4-NO2  
 EXPNO 3  
 PROCNO 1

F2 - Acquisition Parameters  
 Date\_ 20200613  
 Time 23.42  
 INSTRUM spect  
 PROBHD 5 mm PABBO BB/  
 PULPROG zg30  
 TD 32768  
 SOLVENT CDCl3  
 NS 32  
 DS 0  
 SWH 7211.539 Hz  
 FIDRES 0.220079 Hz  
 AQ 2.2719147 sec  
 RG 24.54  
 DW 69.333 usec  
 DE 10.06 usec  
 TE 298.0 K  
 D1 2.00000000 sec  
 TD0 1

===== CHANNEL f1 =====  
 SF01 400.1324008 MHz  
 NUC1 1H  
 P1 15.00 usec  
 PLW1 11.39999962 W

F2 - Processing parameters  
 SI 16384  
 SF 400.1299895 MHz  
 WDW EM  
 SSB 0  
 LB 0 Hz  
 GB 0  
 PC 1.00

<sup>13</sup>C NMR Spectrum of **3c** (CDCl<sub>3</sub>, 100 MHz)

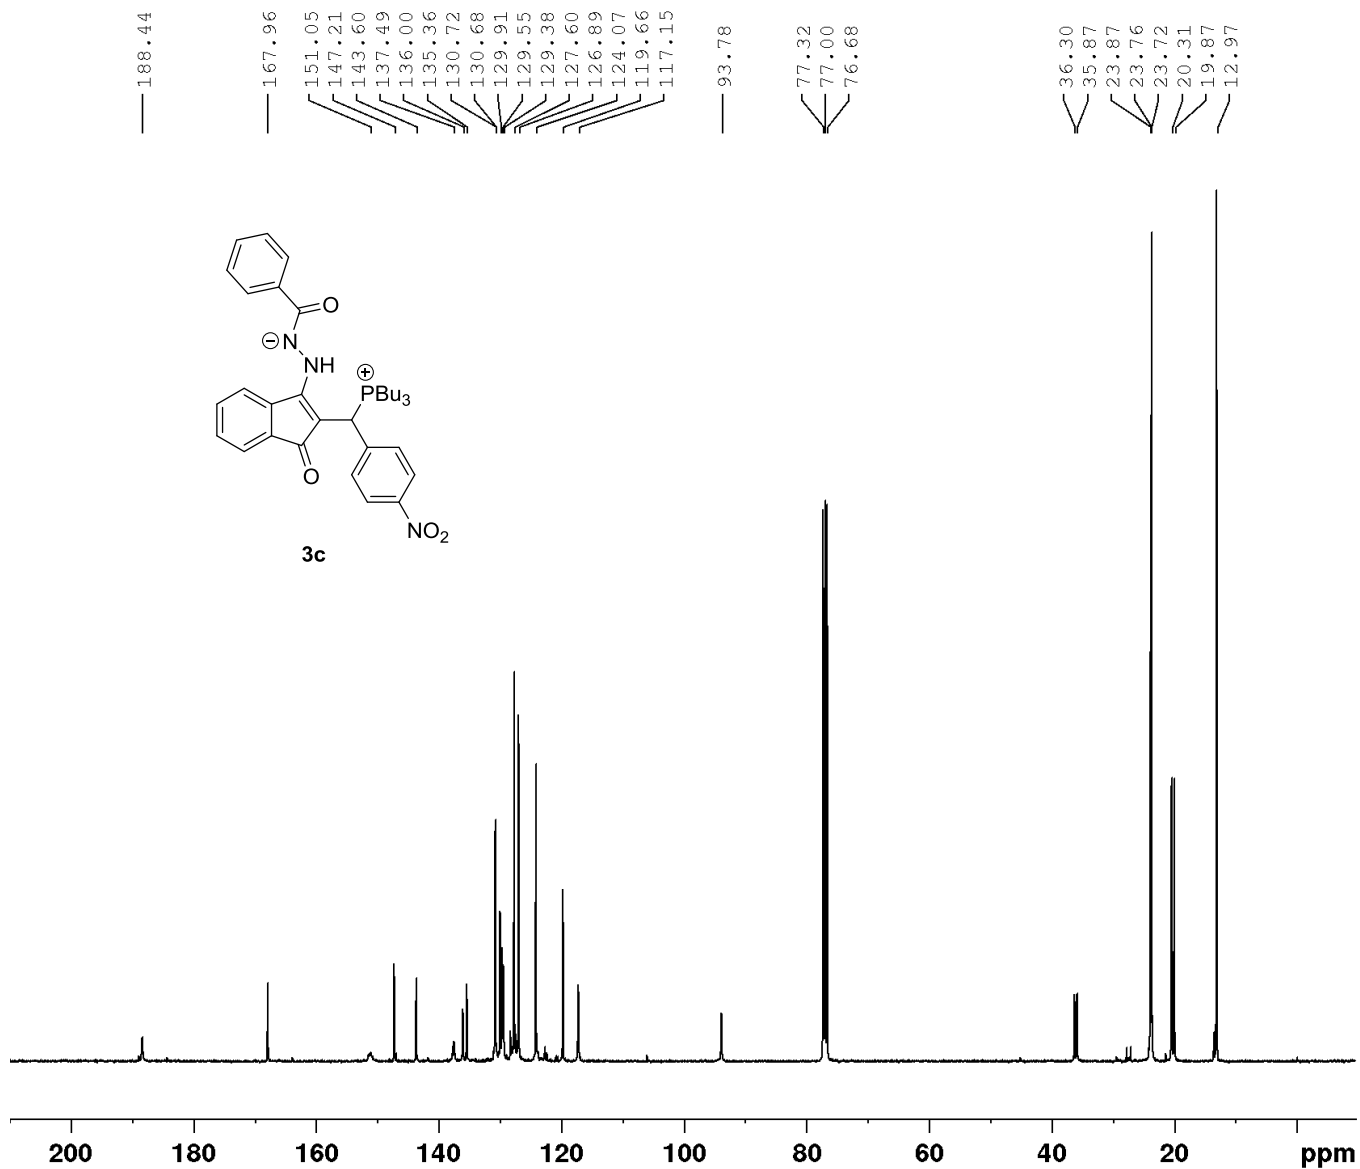

Current Data Parameters  
NAME SW ZW 4-NO2  
EXPNO 4  
PROCNO 1

F2 - Acquisition Parameters  
Date\_ 20200613  
Time 23.45  
INSTRUM spect  
PROBHD 5 mm PABBO BB/  
PULPROG zgpg30  
TD 32768  
SOLVENT CDCl3  
NS 9950  
DS 0  
SWH 24038.461 Hz  
FIDRES 0.733596 Hz  
AQ 0.6815744 sec  
RG 198.09  
DW 20.800 usec  
DE 6.50 usec  
TE 297.9 K  
D1 2.00000000 sec  
D11 0.03000000 sec  
TD0 1

===== CHANNEL f1 =====  
SFO1 100.6228298 MHz  
NUC1 13C  
P1 10.00 usec  
PLW1 49.50000000 W

===== CHANNEL f2 =====  
SFO2 400.1316005 MHz  
NUC2 1H  
CPDPRG[2] waltz16  
PCPD2 90.00 usec  
PLW2 12.50000000 W  
PLW12 0.34722000 W  
PLW13 0.28125000 W

F2 - Processing parameters  
SI 32768  
SF 100.6127887 MHz  
WDW EM  
SSB 0  
LB 2.00 Hz  
GB 0  
PC 1.00

<sup>31</sup>P NMR Spectrum of **3c** (CDCl<sub>3</sub>, 162 MHz)

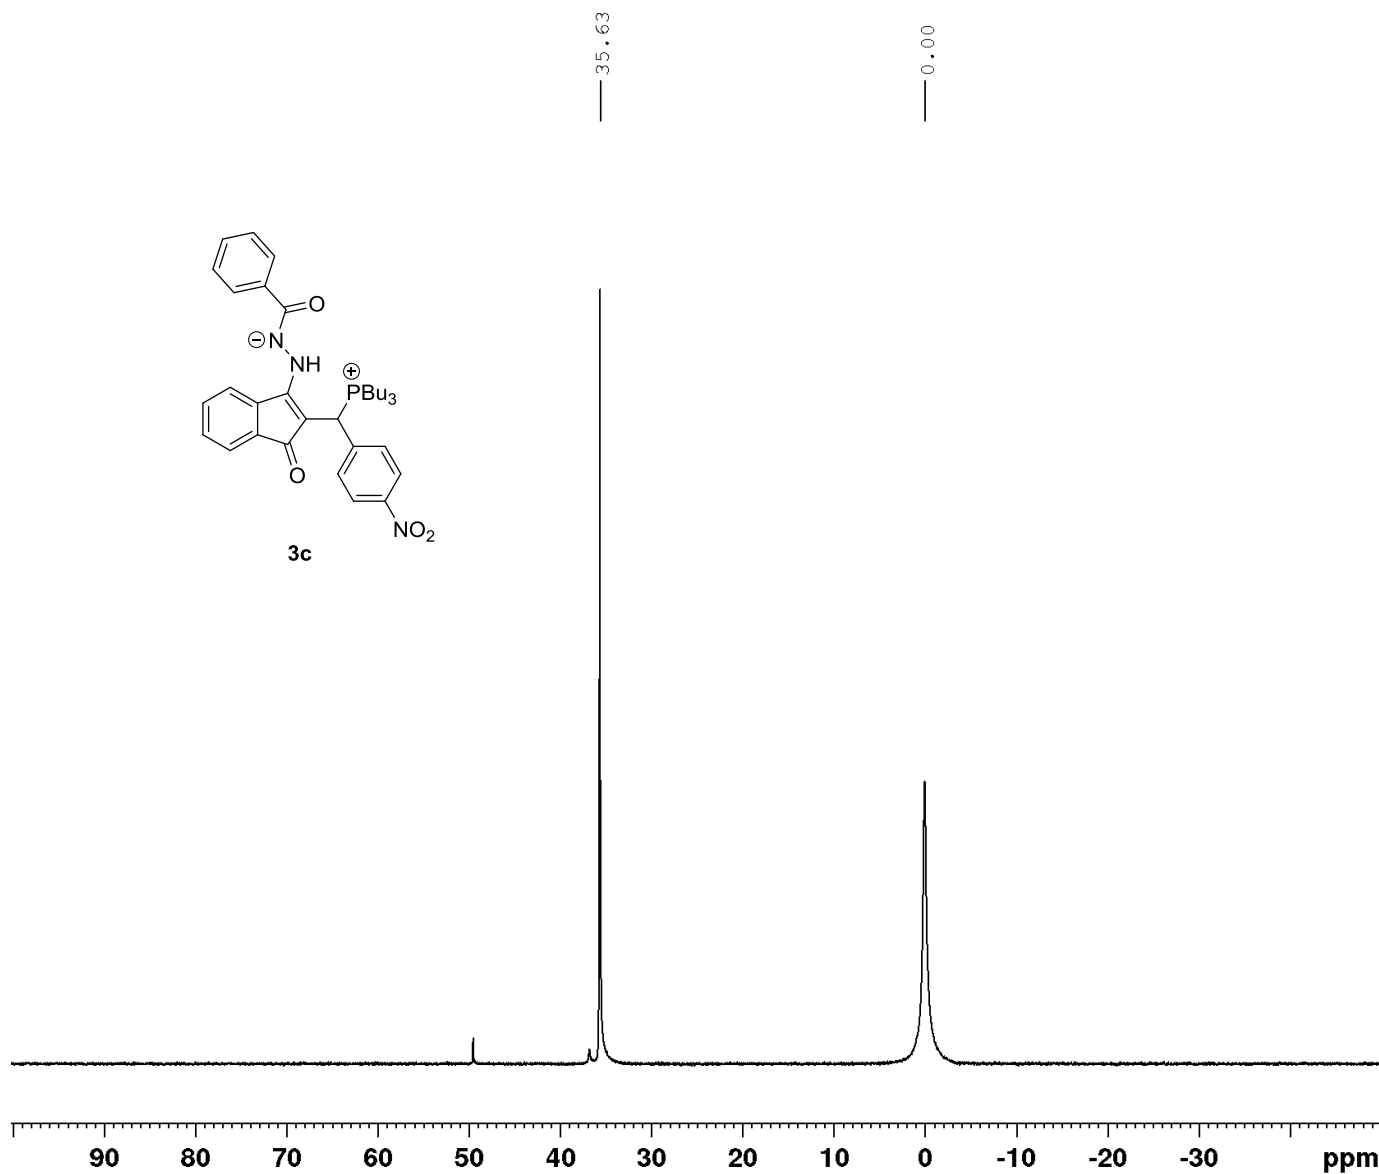

Current Data Parameters  
NAME SW ZW 4-NO2  
EXPNO 5  
PROCNO 1

F2 - Acquisition Parameters  
Date\_ 20200614  
Time 11.08  
INSTRUM spect  
PROBHD 5 mm PABBO BB/  
PULPROG zgpg30  
TD 65536  
SOLVENT CDCl3  
NS 32  
DS 4  
SWH 49019.609 Hz  
FIDRES 0.747980 Hz  
AQ 0.6684672 sec  
RG 198.09  
DW 10.200 usec  
DE 6.50 usec  
TE 294.5 K  
D1 2.00000000 sec  
D11 0.03000000 sec  
TD0 1

===== CHANNEL f1 =====  
SFO1 161.9836917 MHz  
NUC1 31P  
P1 15.00 usec  
PLW1 13.19999981 W

===== CHANNEL f2 =====  
SFO2 400.1316005 MHz  
NUC2 1H  
CPDPRG[2] waltz16  
PCPD2 90.00 usec  
PLW2 12.50000000 W  
PLW12 0.34722000 W  
PLW13 0.28125000 W

F2 - Processing parameters  
SI 32768  
SF 161.9755107 MHz  
WDW EM  
SSB 0  
LB 2.00 Hz  
GB 0  
PC 1.40

<sup>1</sup>H NMR Spectrum of **3d** (CDCl<sub>3</sub>, 400 MHz)

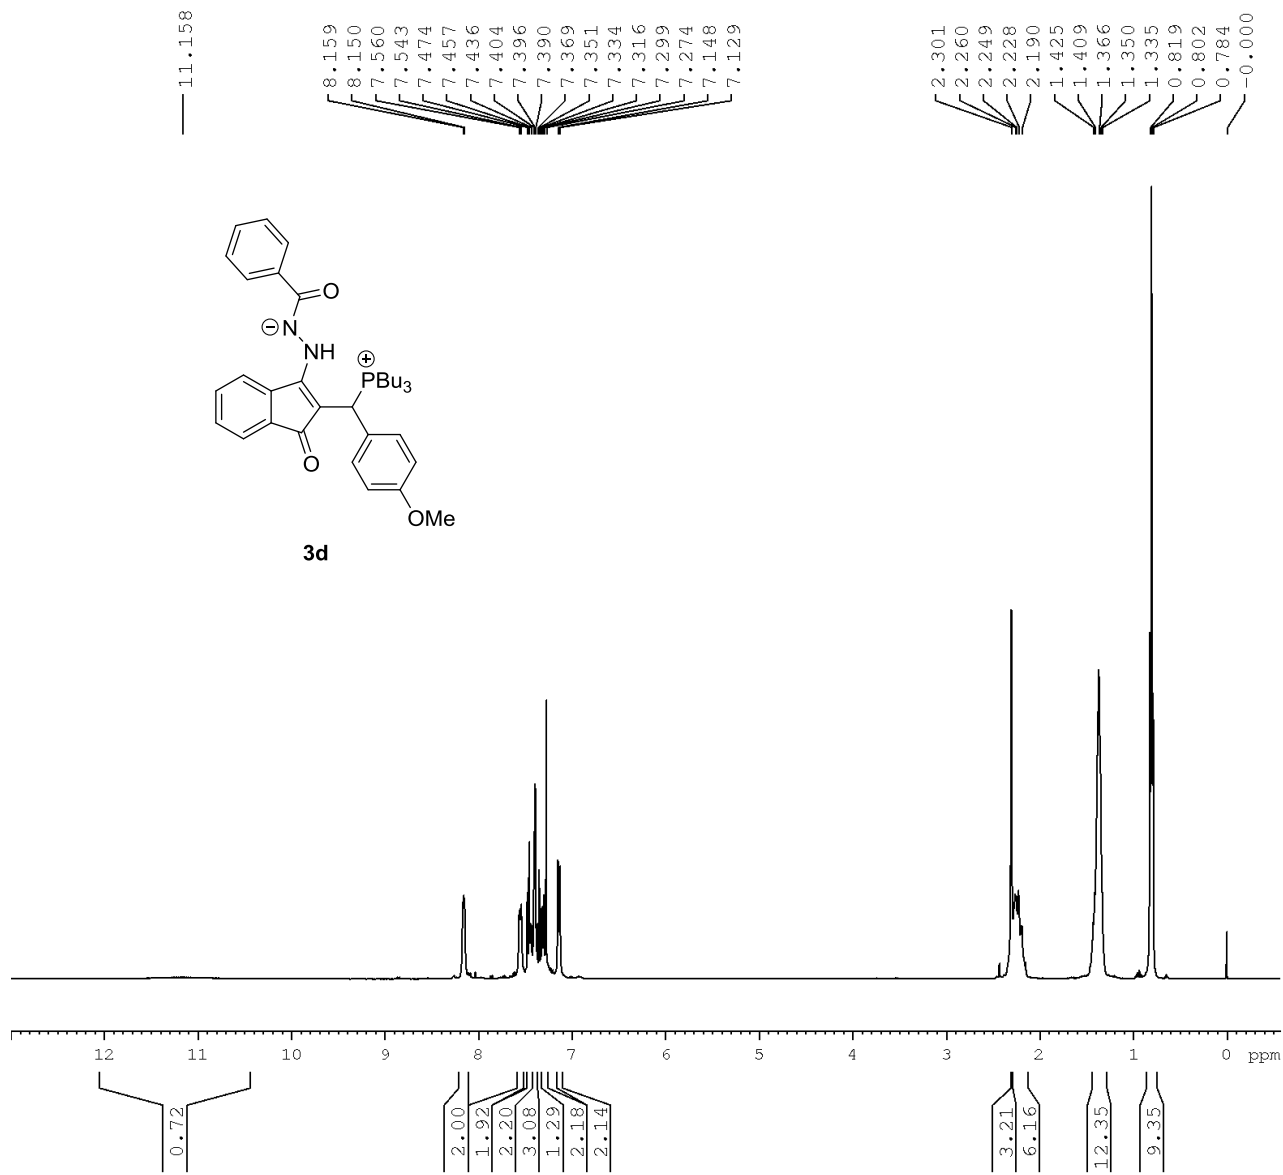

Current Data Parameters  
 NAME SW 894  
 EXPNO 4  
 PROCNO 1

F2 - Acquisition Parameters  
 Date\_ 20200530  
 Time 23.54  
 INSTRUM spect  
 PROBHD 5 mm BBO BB-1H  
 PULPROG zg30  
 TD 32768  
 SOLVENT CDCl3  
 NS 32  
 DS 0  
 SWH 7246.377 Hz  
 FIDRES 0.221142 Hz  
 AQ 2.2609921 sec  
 RG 57  
 DW 69.000 usec  
 DE 6.50 usec  
 TE 299.6 K  
 D1 2.00000000 sec  
 TD0 1

===== CHANNEL f1 =====  
 NUC1 1H  
 P1 15.00 usec  
 PL1 11.10 dB  
 SFO1 400.1324008 MHz

F2 - Processing parameters  
 SI 16384  
 SF 400.1300062 MHz  
 WDW EM  
 SSB 0  
 LB 0 Hz  
 GB 0  
 PC 1.00

<sup>13</sup>C NMR Spectrum of **3d** (CDCl<sub>3</sub>, 100 MHz)

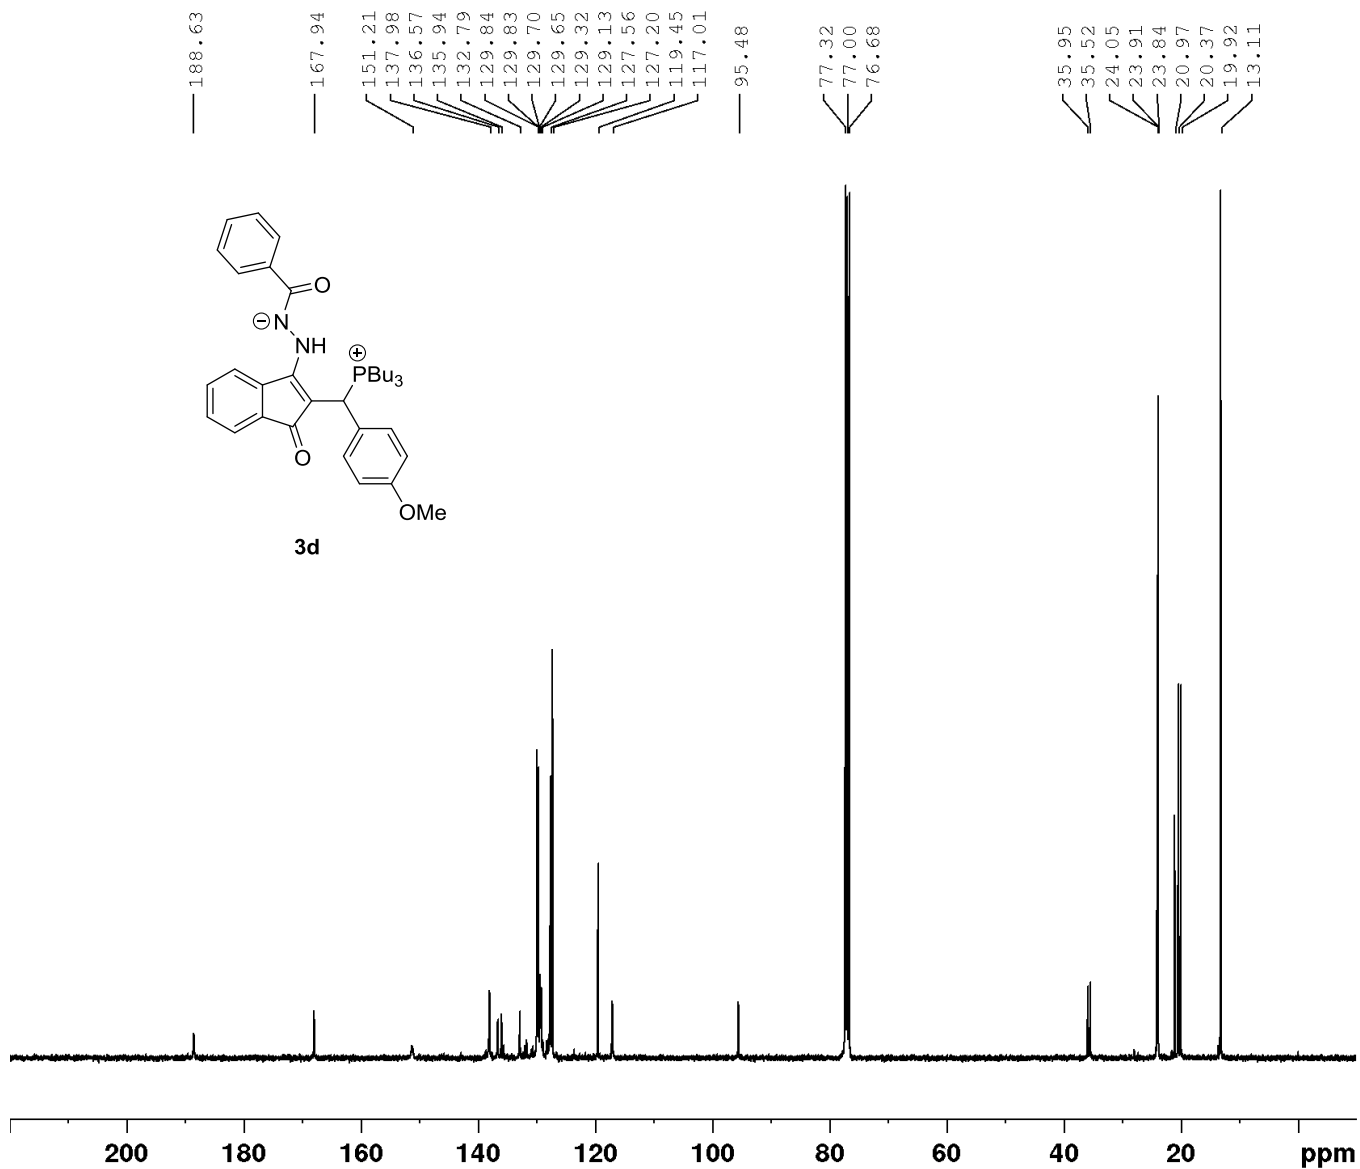

Current Data Parameters  
NAME SW 894  
EXPNO 5  
PROCNO 1

F2 - Acquisition Parameters  
Date\_ 20200530  
Time 23.57  
INSTRUM spect  
PROBHD 5 mm BBO BB-1H  
PULPROG zgpg30  
TD 32768  
SOLVENT CDCl3  
NS 10000  
DS 0  
SWH 24038.461 Hz  
FIDRES 0.733596 Hz  
AQ 0.6815744 sec  
RG 4096  
DW 20.800 usec  
DE 6.50 usec  
TE 299.6 K  
D1 2.00000000 sec  
D11 0.03000000 sec  
TD0 1

===== CHANNEL f1 =====  
NUC1 13C  
P1 10.00 usec  
PL1 3.80 dB  
SFO1 100.6233325 MHz

===== CHANNEL f2 =====  
CPDPRG[2] waltz16  
NUC2 1H  
PCPD2 90.00 usec  
PL2 10.20 dB  
PL12 26.00 dB  
PL13 29.00 dB  
SFO2 400.1316005 MHz

F2 - Processing parameters  
SI 32768  
SF 100.6127763 MHz  
WDW EM  
SSB 0  
LB 1.00 Hz  
GB 0  
PC 1.00

<sup>31</sup>P NMR Spectrum of 3d (CDCl<sub>3</sub>, 162 MHz)

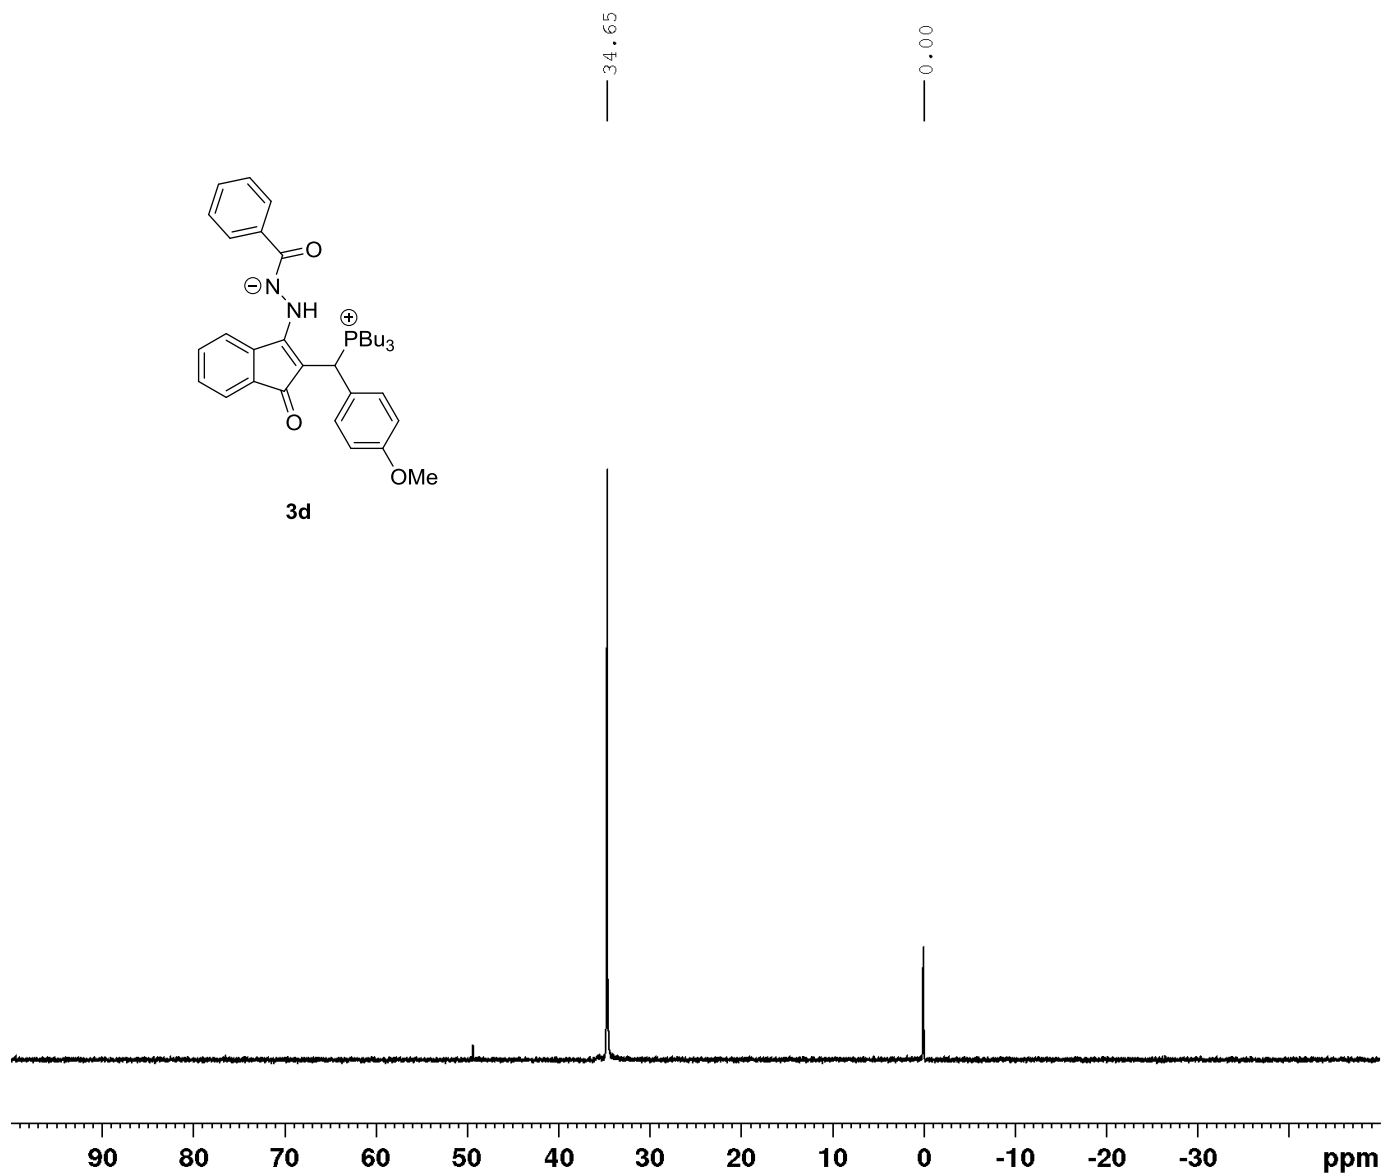

Current Data Parameters  
NAME SW 894  
EXPNO 6  
PROCNO 1

F2 - Acquisition Parameters  
Date\_ 20200601  
Time 11.56  
INSTRUM spect  
PROBHD 5 mm BBO BB-1H  
PULPROG zgpg30  
TD 65536  
SOLVENT CDCl3  
NS 16  
DS 0  
SWH 64724.918 Hz  
FIDRES 0.987624 Hz  
AQ 0.5062656 sec  
RG 11585.2  
DW 7.725 usec  
DE 6.50 usec  
TE 296.8 K  
D1 2.00000000 sec  
D11 0.03000000 sec  
TD0 1

==== CHANNEL f1 =====  
NUC1 31P  
P1 15.40 usec  
PL1 10.90 dB  
SFO1 161.9674942 MHz

==== CHANNEL f2 =====  
CPDPRG[2] waltz16  
NUC2 1H  
PCPD2 90.00 usec  
PL2 10.20 dB  
PL12 26.00 dB  
PL13 29.00 dB  
SFO2 400.1316005 MHz

F2 - Processing parameters  
SI 32768  
SF 161.9755116 MHz  
WDW EM  
SSB 0  
LB 1.00 Hz  
GB 0  
PC 1.00



<sup>1</sup>H NMR Spectrum of **3e** (CDCl<sub>3</sub>, 400 MHz)

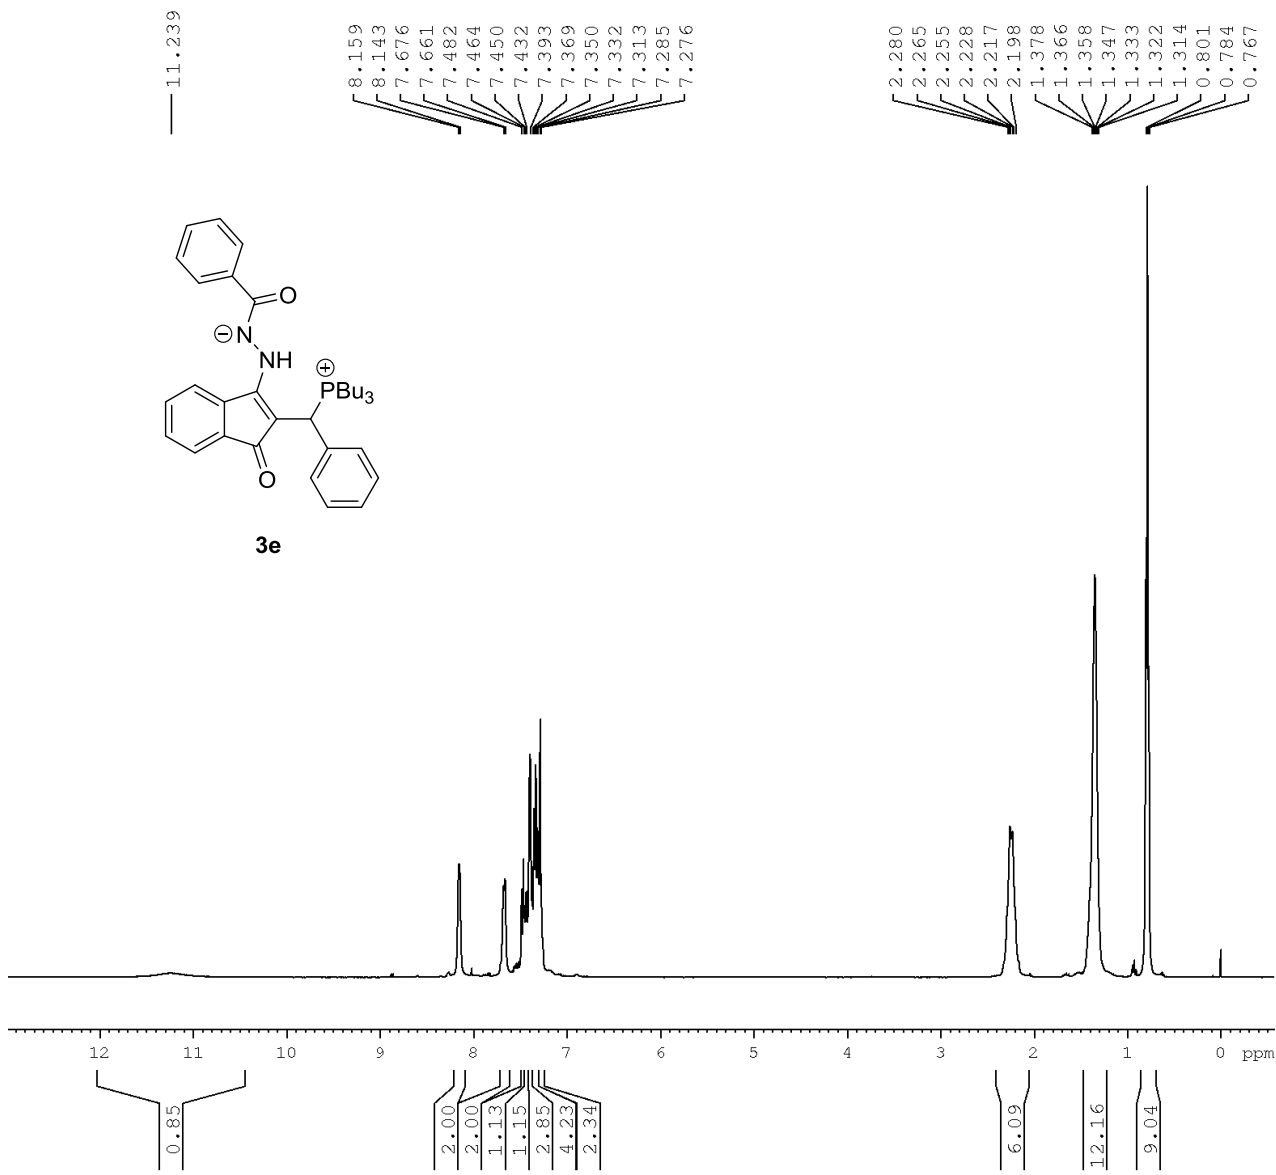

Current Data Parameters  
NAME SW ZW ns  
EXPNO 1  
PROCNO 1

F2 - Acquisition Parameters  
Date\_ 20200611  
Time 22.00  
INSTRUM spect  
PROBHD 5 mm BBO BB-1H  
PULPROG zg30  
TD 32768  
SOLVENT CDCl3  
NS 32  
DS 0  
SWH 7246.377 Hz  
FIDRES 0.221142 Hz  
AQ 2.2609921 sec  
RG 35.9  
DW 69.000 usec  
DE 6.50 usec  
TE 297.9 K  
D1 2.00000000 sec  
TD0 1

===== CHANNEL f1 =====  
NUC1 1H  
P1 15.00 usec  
PL1 11.10 dB  
SFO1 400.1324008 MHz

F2 - Processing parameters  
SI 16384  
SF 400.1300019 MHz  
WDW EM  
SSB 0  
LB 0 Hz  
GB 0  
PC 1.00

<sup>13</sup>C NMR Spectrum of **3e** (CDCl<sub>3</sub>, 100 MHz)

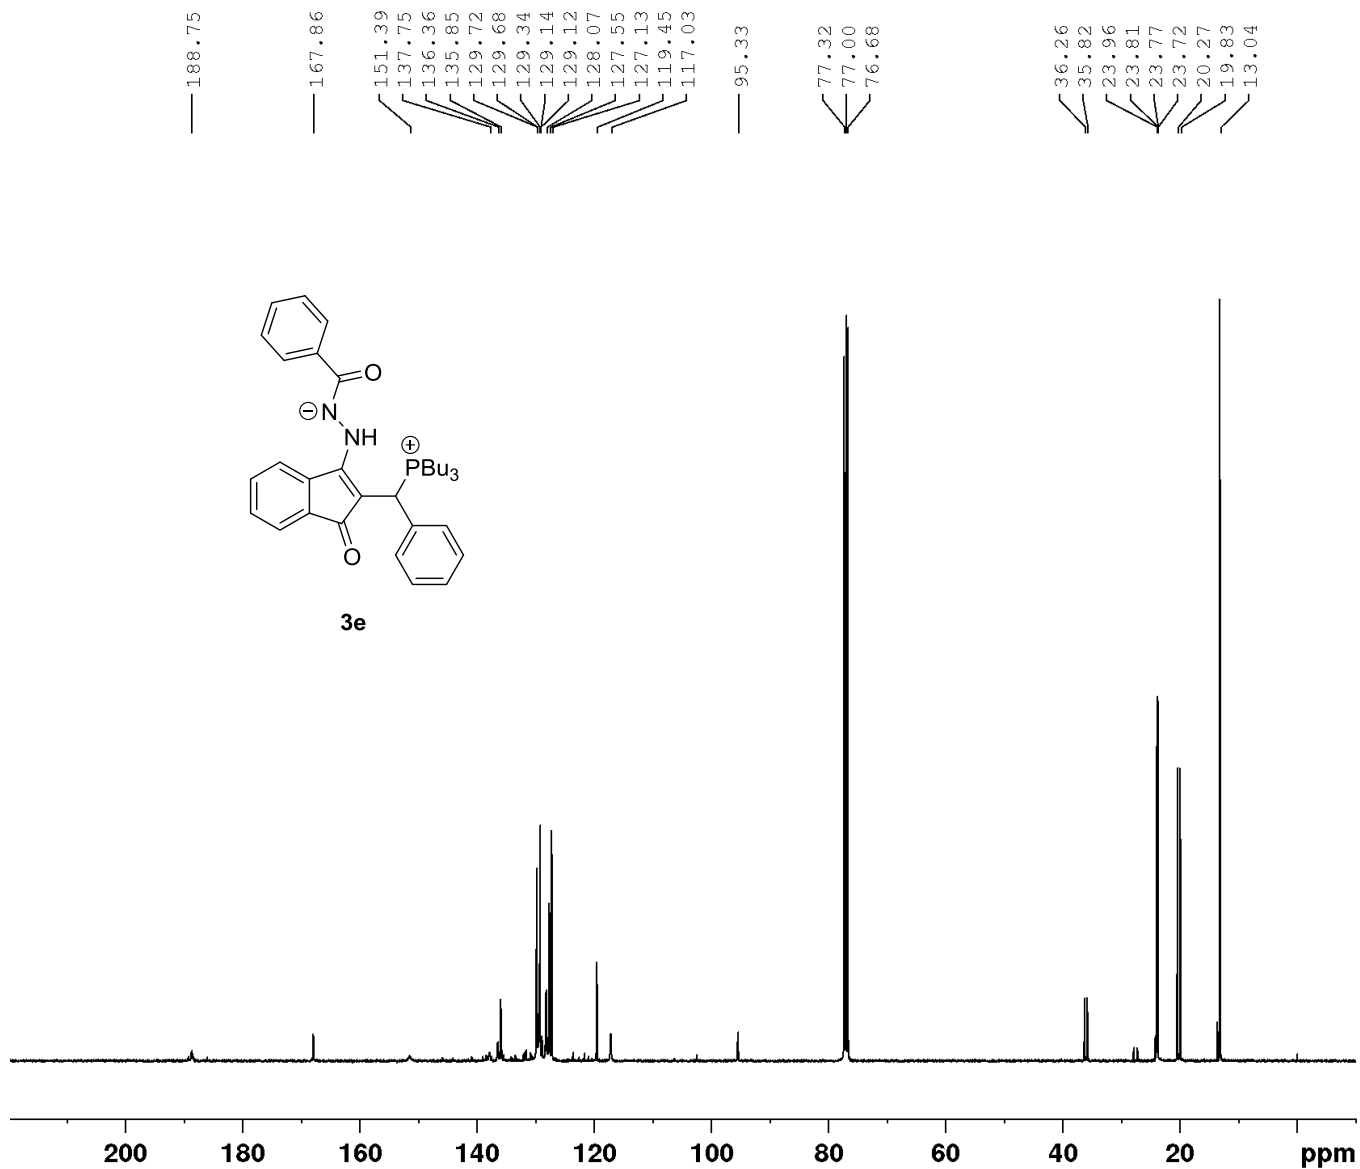

Current Data Parameters  
NAME SW ZW ns  
EXPNO 2  
PROCNO 1

F2 - Acquisition Parameters  
Date\_ 20200611  
Time 22.03  
INSTRUM spect  
PROBHD 5 mm BBO BB-1H  
PULPROG zgpg30  
TD 32768  
SOLVENT CDCl3  
NS 15000  
DS 0  
SWH 24038.461 Hz  
FIDRES 0.733596 Hz  
AQ 0.6815744 sec  
RG 4096  
DW 20.800 usec  
DE 6.50 usec  
TE 297.8 K  
D1 2.00000000 sec  
D11 0.03000000 sec  
TD0 1

=====  
CHANNEL f1  
NUC1 13C  
P1 10.00 usec  
PL1 3.80 dB  
SFO1 100.6233325 MHz

=====  
CHANNEL f2  
CPDPRG[2] waltz16  
NUC2 1H  
PCPD2 90.00 usec  
PL2 10.20 dB  
PL12 26.00 dB  
PL13 29.00 dB  
SFO2 400.1316005 MHz

F2 - Processing parameters  
SI 32768  
SF 100.6127817 MHz  
WDW EM  
SSB 0  
LB 1.00 Hz  
GB 0  
PC 1.00

<sup>31</sup>P NMR Spectrum of **3e** (CDCl<sub>3</sub>, 162 MHz)

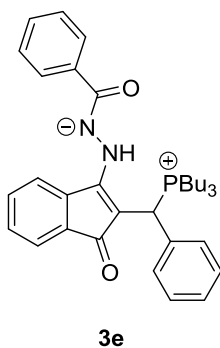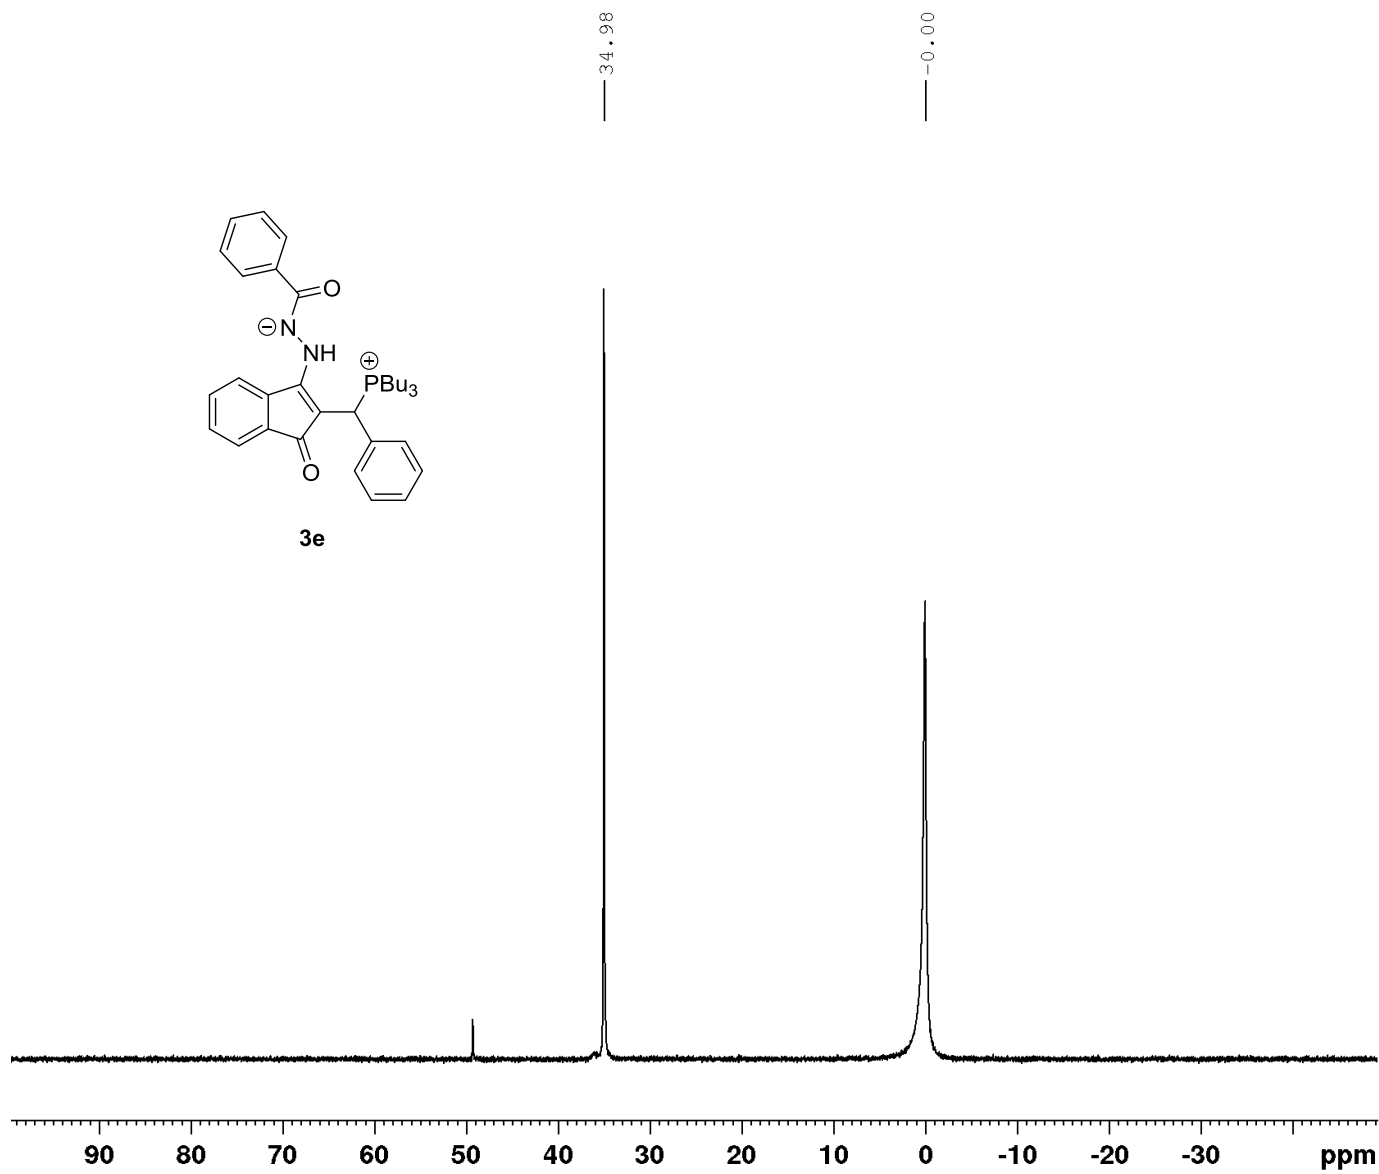

Current Data Parameters  
NAME SW ZW ns  
EXPNO 3  
PROCNO 1

F2 - Acquisition Parameters  
Date\_ 20200612  
Time 10.03  
INSTRUM spect  
PROBHD 5 mm BBO BB-1H  
PULPROG zgpg30  
TD 65536  
SOLVENT CDCl3  
NS 32  
DS 0  
SWH 64724.918 Hz  
FIDRES 0.987624 Hz  
AQ 0.5062656 sec  
RG 3649.1  
DW 7.725 usec  
DE 6.50 usec  
TE 297.7 K  
D1 2.00000000 sec  
D11 0.03000000 sec  
TDO 1

===== CHANNEL f1 =====  
NUC1 31P  
P1 15.40 usec  
PL1 10.90 dB  
SFO1 161.9674942 MHz

===== CHANNEL f2 =====  
CPDPRG[2] waltz16  
NUC2 1H  
PCPD2 90.00 usec  
PL2 10.20 dB  
PL12 26.00 dB  
PL13 29.00 dB  
SFO2 400.1316005 MHz

F2 - Processing parameters  
SI 32768  
SF 161.9755139 MHz  
WDW EM  
SSB 0  
LB 1.00 Hz  
GB 0  
PC 1.00



<sup>13</sup>C NMR Spectrum of **3f** (CDCl<sub>3</sub>, 100 MHz)

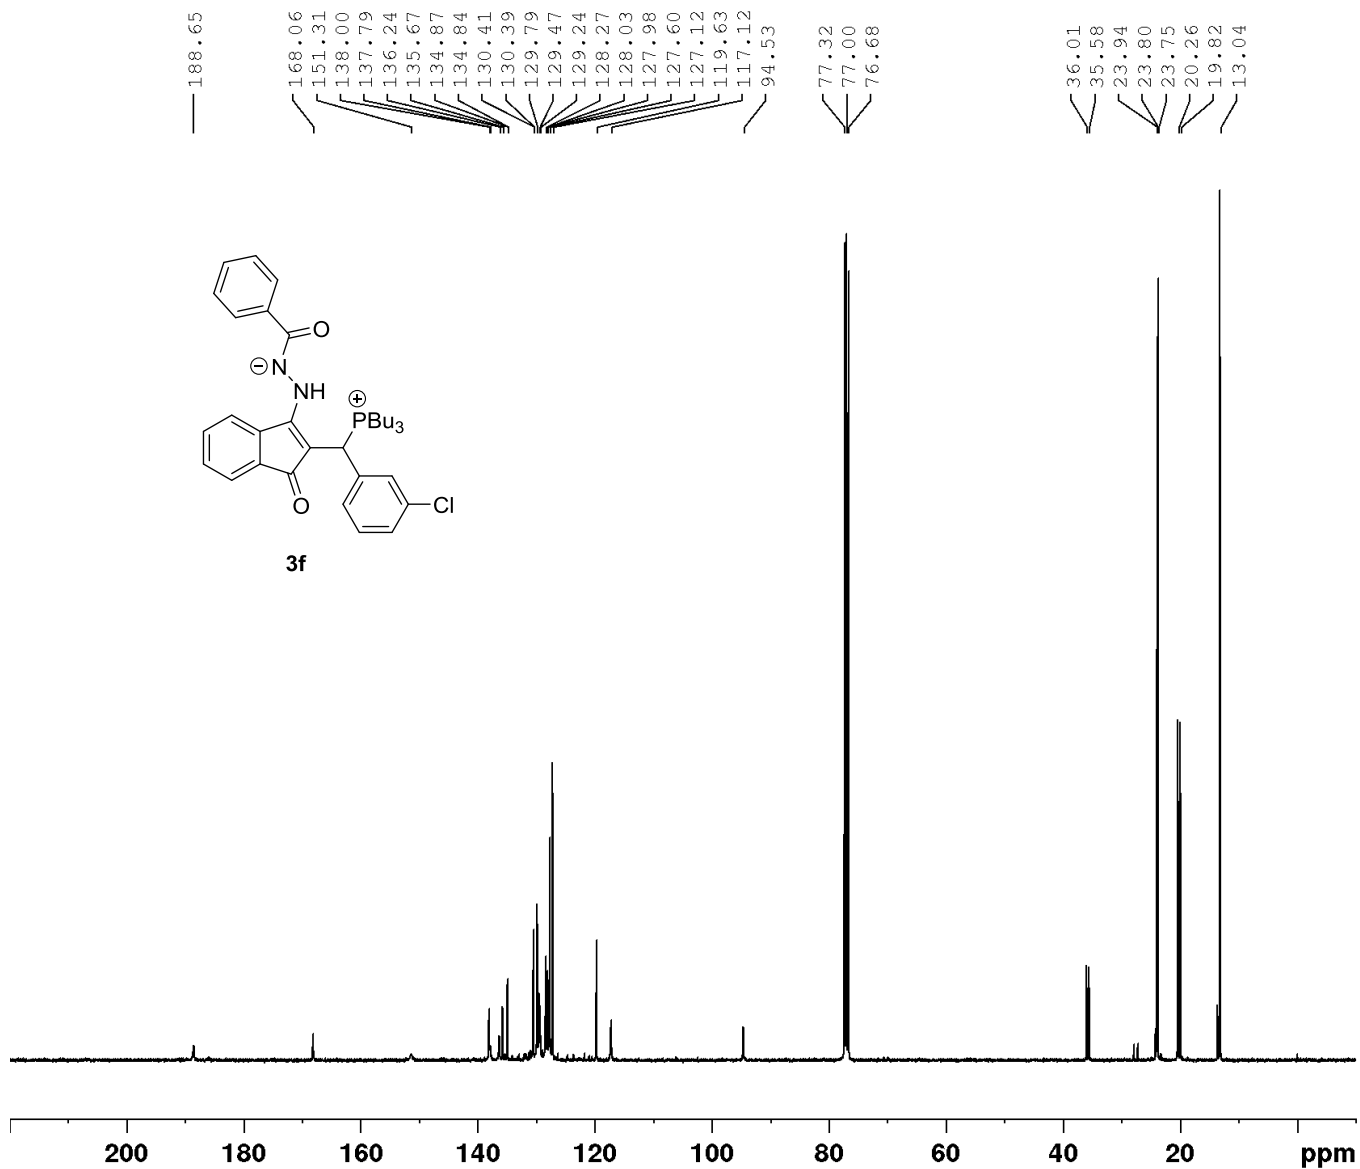

Current Data Parameters  
NAME SW ZW 3-C1  
EXPNO 2  
PROCNO 1

F2 - Acquisition Parameters  
Date\_ 20200610  
Time 22.07  
INSTRUM spect  
PROBHD 5 mm BBO BB-1H  
PULPROG zgpg30  
TD 32768  
SOLVENT CDCl3  
NS 13449  
DS 0  
SWH 24038.461 Hz  
FIDRES 0.733596 Hz  
AQ 0.6815744 sec  
RG 4096  
DW 20.800 usec  
DE 6.50 usec  
TE 297.7 K  
D1 2.00000000 sec  
D11 0.03000000 sec  
TD0 1

==== CHANNEL f1 =====  
NUC1 13C  
P1 10.00 usec  
PL1 3.80 dB  
SFO1 100.6233325 MHz

==== CHANNEL f2 =====  
CPDPRG[2] waltz16  
NUC2 1H  
PCPD2 90.00 usec  
PL2 10.20 dB  
PL12 26.00 dB  
PL13 29.00 dB  
SFO2 400.1316005 MHz

F2 - Processing parameters  
SI 32768  
SF 100.6127806 MHz  
WDW EM  
SSB 0  
LB 1.00 Hz  
GB 0  
PC 1.00

<sup>31</sup>P NMR Spectrum of **3f** (CDCl<sub>3</sub>, 162 MHz)

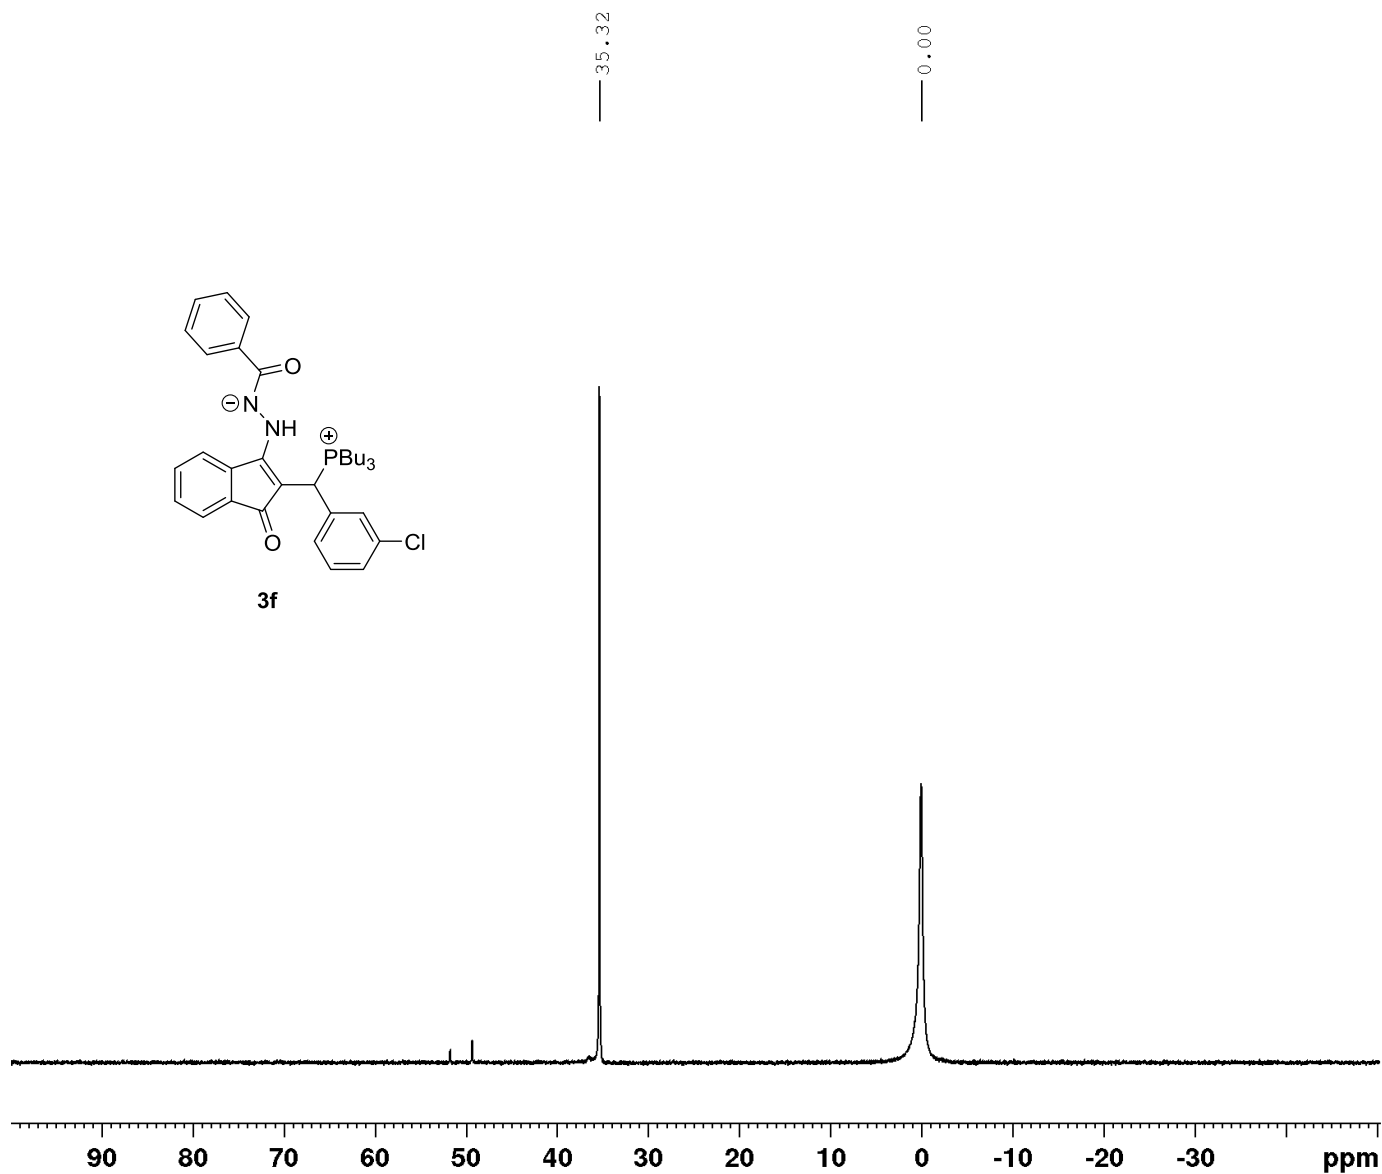

Current Data Parameters  
NAME SW ZW 3-C1  
EXPNO 3  
PROCNO 1

F2 - Acquisition Parameters  
Date\_ 20200611  
Time 10.38  
INSTRUM spect  
PROBHD 5 mm BBO BB-1H  
PULPROG zgpg30  
TD 65536  
SOLVENT CDCl3  
NS 32  
DS 0  
SWH 64724.918 Hz  
FIDRES 0.987624 Hz  
AQ 0.5062656 sec  
RG 4096  
DW 7.725 usec  
DE 6.50 usec  
TE 297.4 K  
D1 2.00000000 sec  
D11 0.03000000 sec  
TDO 1

===== CHANNEL f1 =====  
NUC1 31P  
P1 15.40 usec  
PL1 10.90 dB  
SFO1 161.9674942 MHz

===== CHANNEL f2 =====  
CPDPRG[2] waltz16  
NUC2 1H  
PCPD2 90.00 usec  
PL2 10.20 dB  
PL12 26.00 dB  
PL13 29.00 dB  
SFO2 400.1316005 MHz

F2 - Processing parameters  
SI 32768  
SF 161.9755150 MHz  
WDW EM  
SSB 0  
LB 1.00 Hz  
GB 0  
PC 1.00

<sup>1</sup>H NMR Spectrum of 3g (CDCl<sub>3</sub>, 400 MHz)

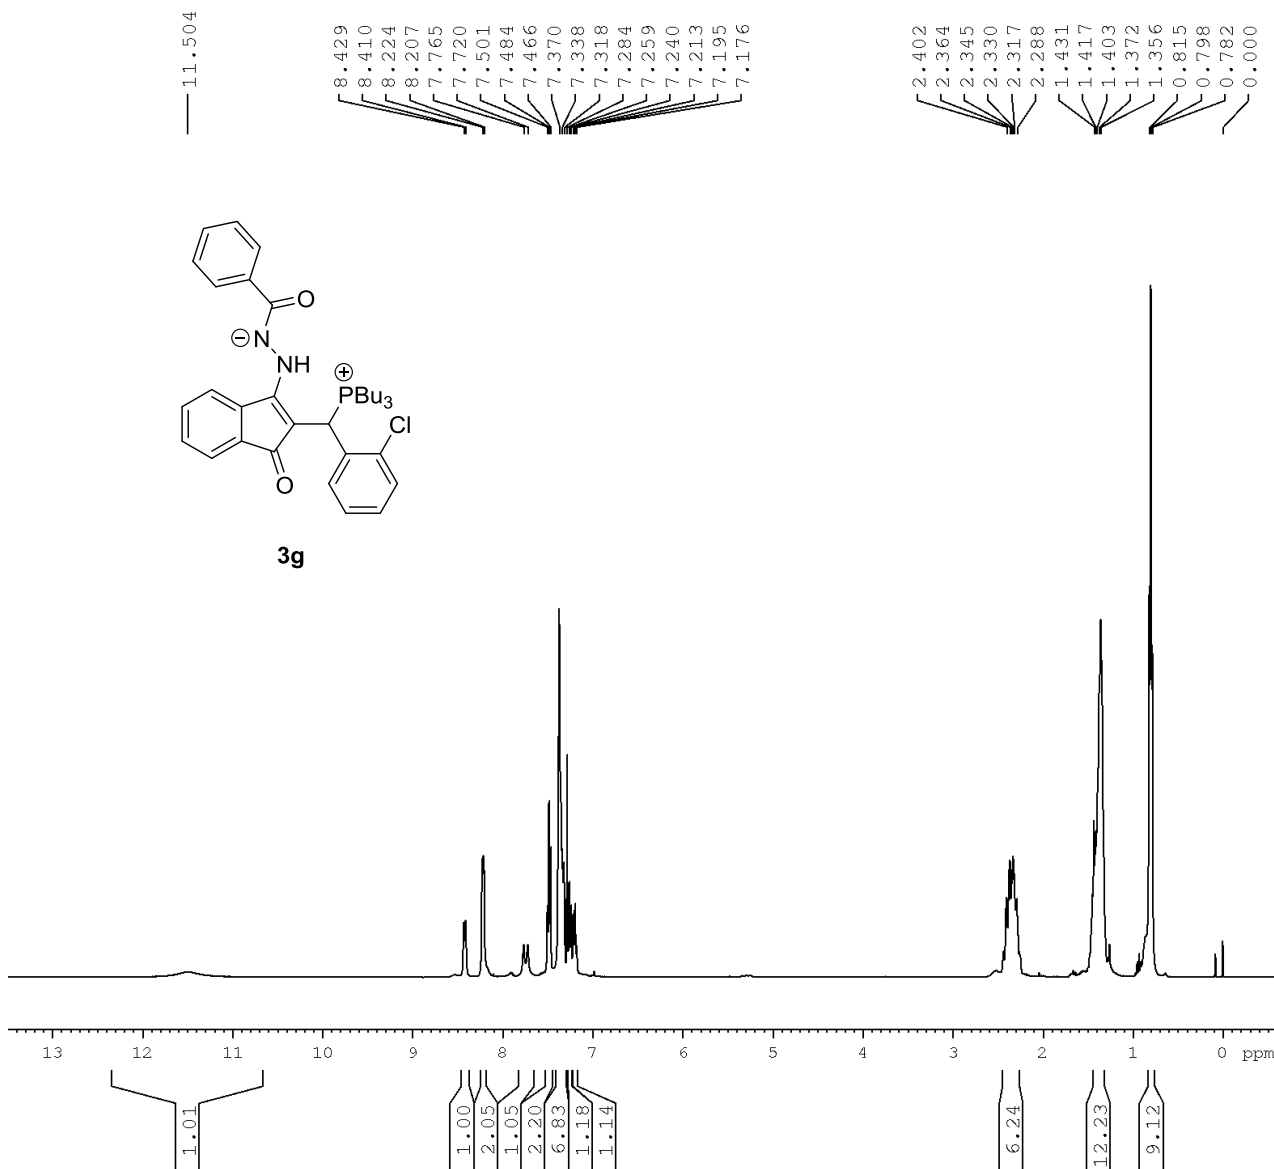

Current Data Parameters  
NAME SW 895-1  
EXPNO 3  
PROCNO 1

F2 - Acquisition Parameters  
Date\_ 20200601  
Time 0.42  
INSTRUM spect  
PROBHD 5 mm PABBO BB/  
PULPROG zg30  
TD 32768  
SOLVENT CDCl3  
NS 32  
DS 0  
SWH 7211.539 Hz  
FIDRES 0.220079 Hz  
AQ 2.2719147 sec  
RG 38.89  
DW 69.333 usec  
DE 10.06 usec  
TE 295.2 K  
D1 2.00000000 sec  
TD0 1

===== CHANNEL f1 =====  
SF01 400.1324008 MHz  
NUC1 1H  
P1 15.00 usec  
PLW1 11.39999962 W

F2 - Processing parameters  
SI 16384  
SF 400.1300000 MHz  
WDW EM  
SSB 0  
LB 0 Hz  
GB 0  
PC 1.00

<sup>13</sup>C NMR Spectrum of **3g** (CDCl<sub>3</sub>, 100 MHz)

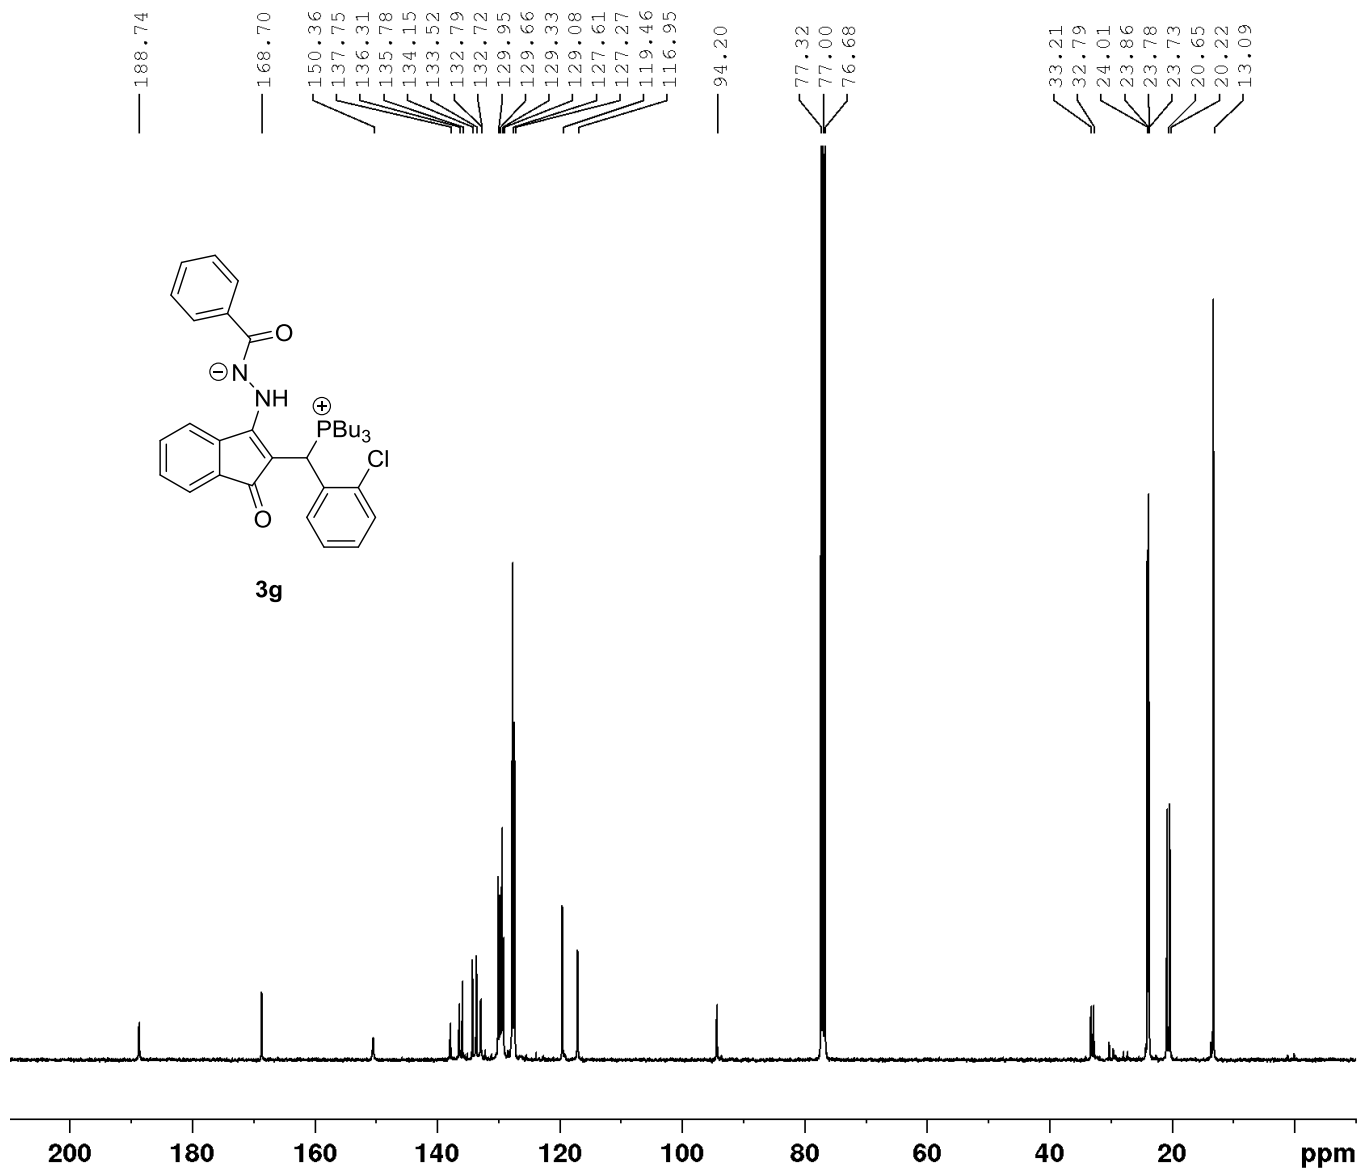

Current Data Parameters  
 NAME SW 895-1  
 EXPNO 4  
 PROCNO 1

F2 - Acquisition Parameters  
 Date\_ 20200601  
 Time 0.45  
 INSTRUM spect  
 PROBHD 5 mm PABBO BB/  
 PULPROG zgpg30  
 TD 32768  
 SOLVENT CDCl3  
 NS 8000  
 DS 0  
 SWH 24038.461 Hz  
 FIDRES 0.733596 Hz  
 AQ 0.6815744 sec  
 RG 198.09  
 DW 20.800 usec  
 DE 6.50 usec  
 TE 295.0 K  
 D1 2.00000000 sec  
 D11 0.03000000 sec  
 TD0 1

===== CHANNEL f1 =====  
 SFO1 100.6228298 MHz  
 NUC1 13C  
 P1 10.00 usec  
 PLW1 49.50000000 W

===== CHANNEL f2 =====  
 SFO2 400.1316005 MHz  
 NUC2 1H  
 CPDPRG[2] waltz16  
 PCPD2 90.00 usec  
 PLW2 12.50000000 W  
 PLW12 0.34722000 W  
 PLW13 0.28125000 W

F2 - Processing parameters  
 SI 32768  
 SF 100.6127795 MHz  
 WDW EM  
 SSB 0  
 LB 2.00 Hz  
 GB 0  
 PC 1.00



<sup>31</sup>P NMR Spectrum of **3g** (CDCl<sub>3</sub>, 162 MHz)

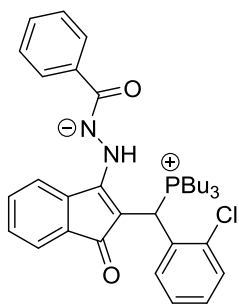

**3g**

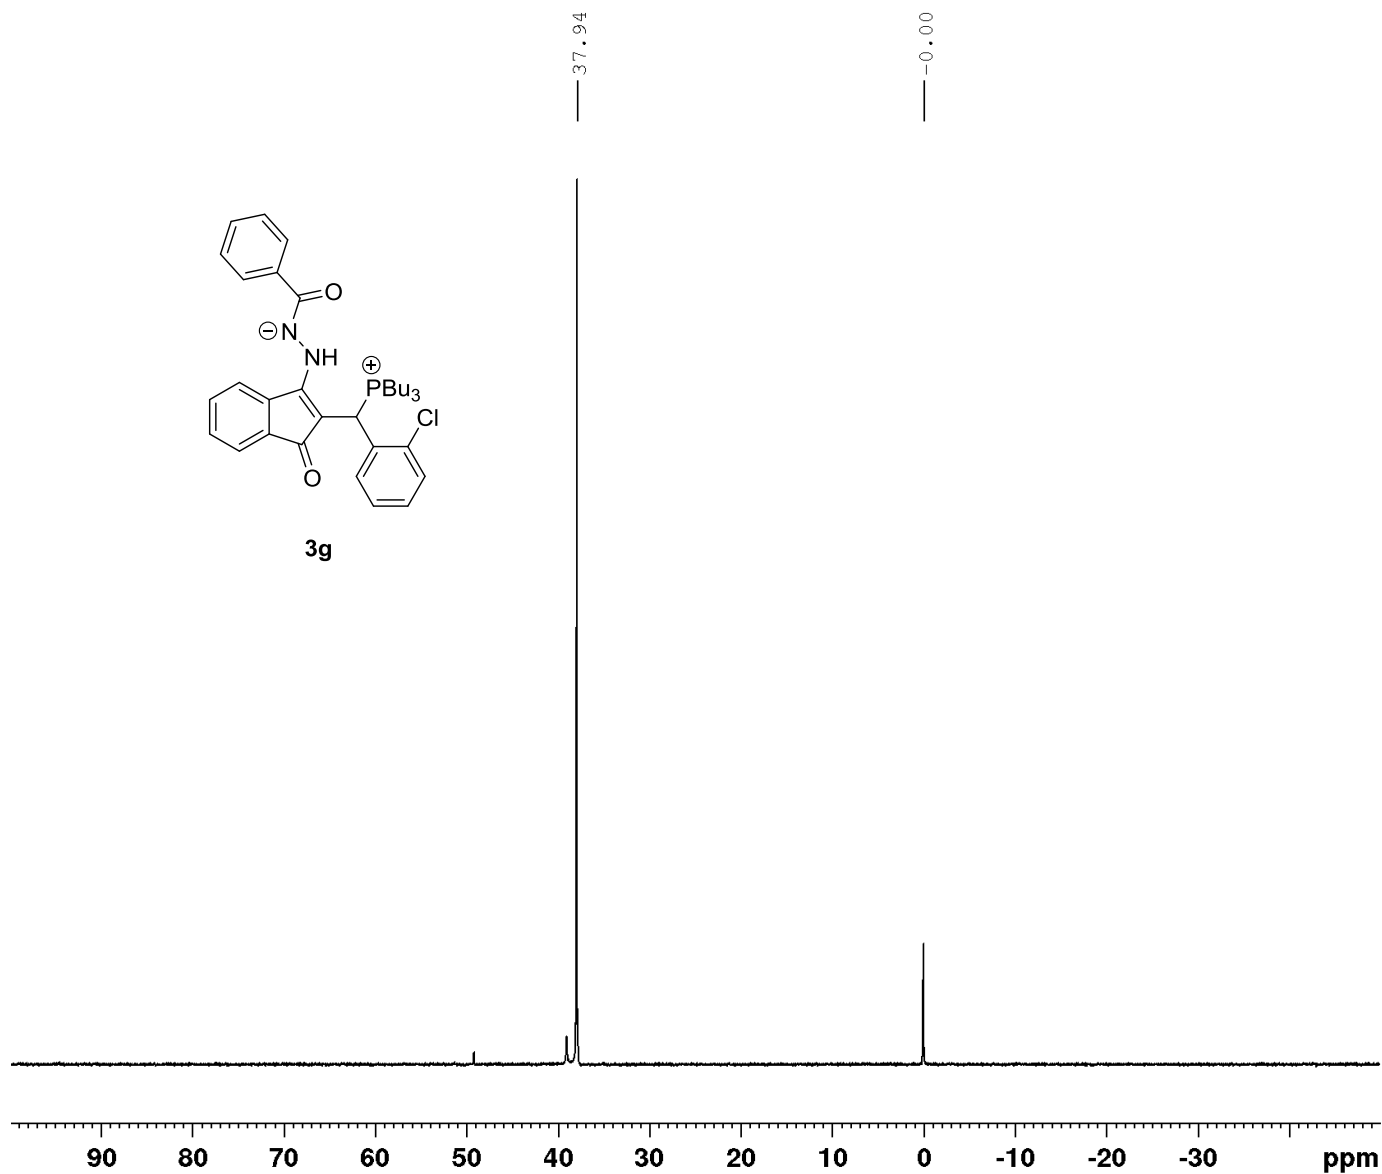

Current Data Parameters  
NAME SW 895-1  
EXPNO 5  
PROCNO 1

F2 - Acquisition Parameters  
Date\_ 20200601  
Time 11.26  
INSTRUM spect  
PROBHD 5 mm PABBO BB/  
PULPROG zgpg30  
TD 65536  
SOLVENT CDCl3  
NS 16  
DS 4  
SWH 49019.609 Hz  
FIDRES 0.747980 Hz  
AQ 0.6684672 sec  
RG 198.09  
DW 10.200 usec  
DE 6.50 usec  
TE 293.5 K  
D1 2.00000000 sec  
D11 0.03000000 sec  
TD0 1

===== CHANNEL f1 =====  
SFO1 161.9836917 MHz  
NUC1 31P  
P1 15.00 usec  
PLW1 13.19999981 W

===== CHANNEL f2 =====  
SFO2 400.1316005 MHz  
NUC2 1H  
CPDPRG[2] waltz16  
PCPD2 90.00 usec  
PLW2 12.50000000 W  
PLW12 0.34722000 W  
PLW13 0.28125000 W

F2 - Processing parameters  
SI 32768  
SF 161.9755116 MHz  
WDW EM  
SSB 0  
LB 2.00 Hz  
GB 0  
PC 1.40

<sup>1</sup>H NMR Spectrum of 3h (CDCl<sub>3</sub>, 400 MHz)

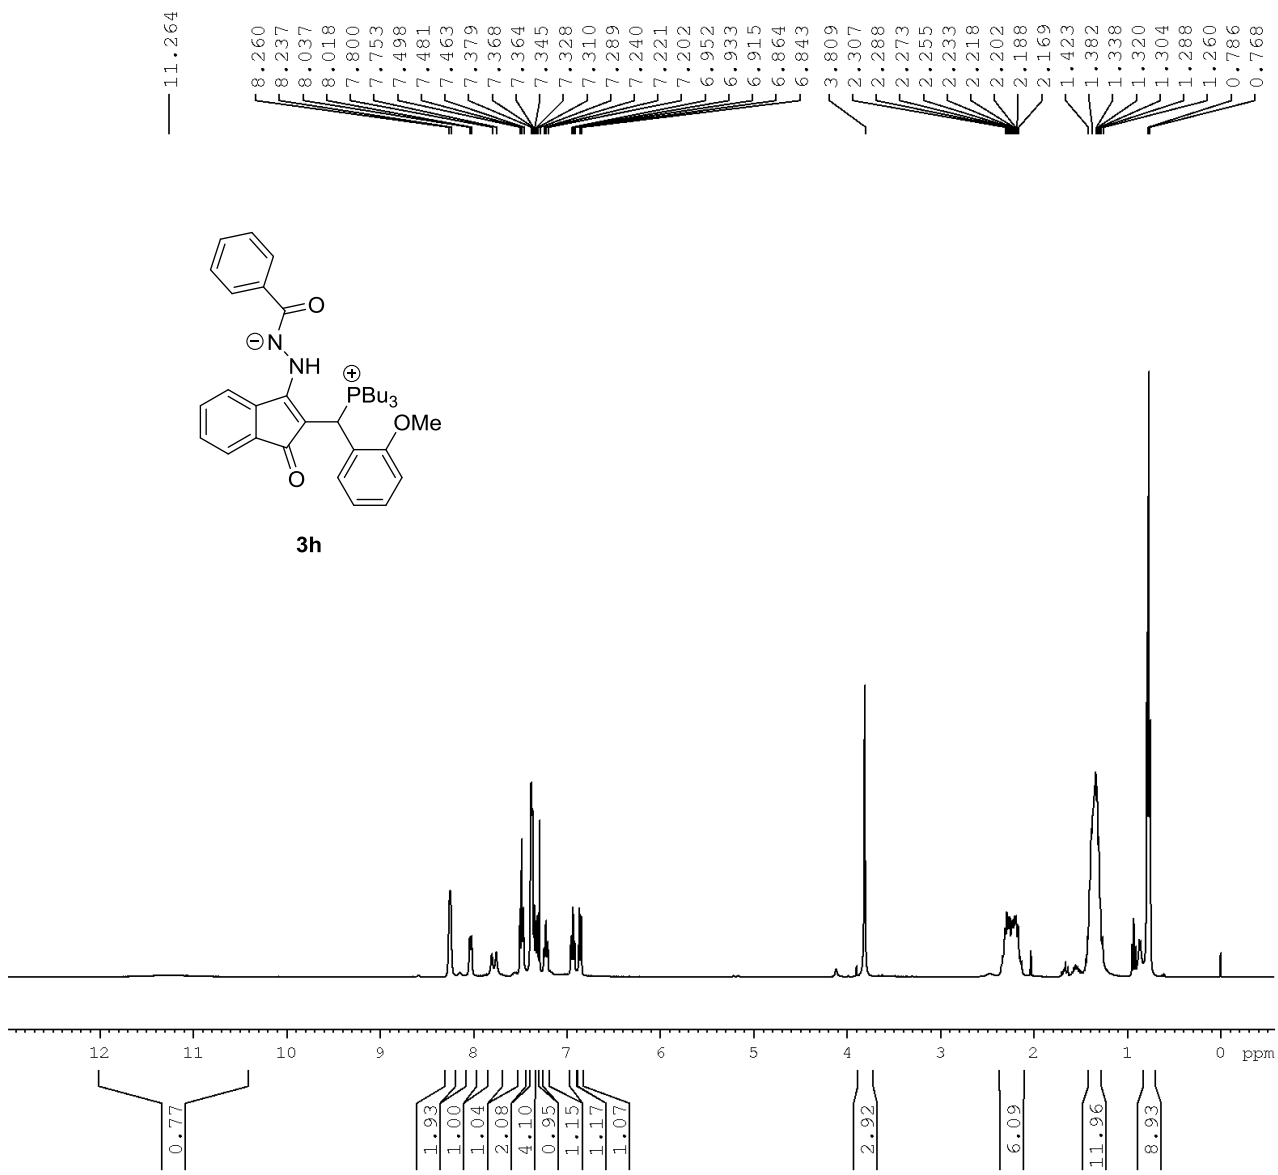

Current Data Parameters  
 NAME SW ZW 2 Ome  
 EXPNO 1  
 PROCNO 1

F2 - Acquisition Parameters  
 Date\_ 20200613  
 Time 23.26  
 INSTRUM spect  
 PROBHD 5 mm BBO BB-1H  
 PULPROG zg30  
 TD 32768  
 SOLVENT CDCl3  
 NS 32  
 DS 0  
 SWH 7246.377 Hz  
 FIDRES 0.221142 Hz  
 AQ 2.2609921 sec  
 RG 35.9  
 DW 69.000 usec  
 DE 6.50 usec  
 TE 297.7 K  
 D1 2.00000000 sec  
 TD0 1

===== CHANNEL f1 =====  
 NUC1 1H  
 P1 15.00 usec  
 PL1 11.10 dB  
 SFO1 400.1324008 MHz

F2 - Processing parameters  
 SI 16384  
 SF 400.1300000 MHz  
 WDW EM  
 SSB 0  
 LB 0 Hz  
 GB 0  
 PC 1.00

<sup>13</sup>C NMR Spectrum of **3h** (CDCl<sub>3</sub>, 100 MHz)

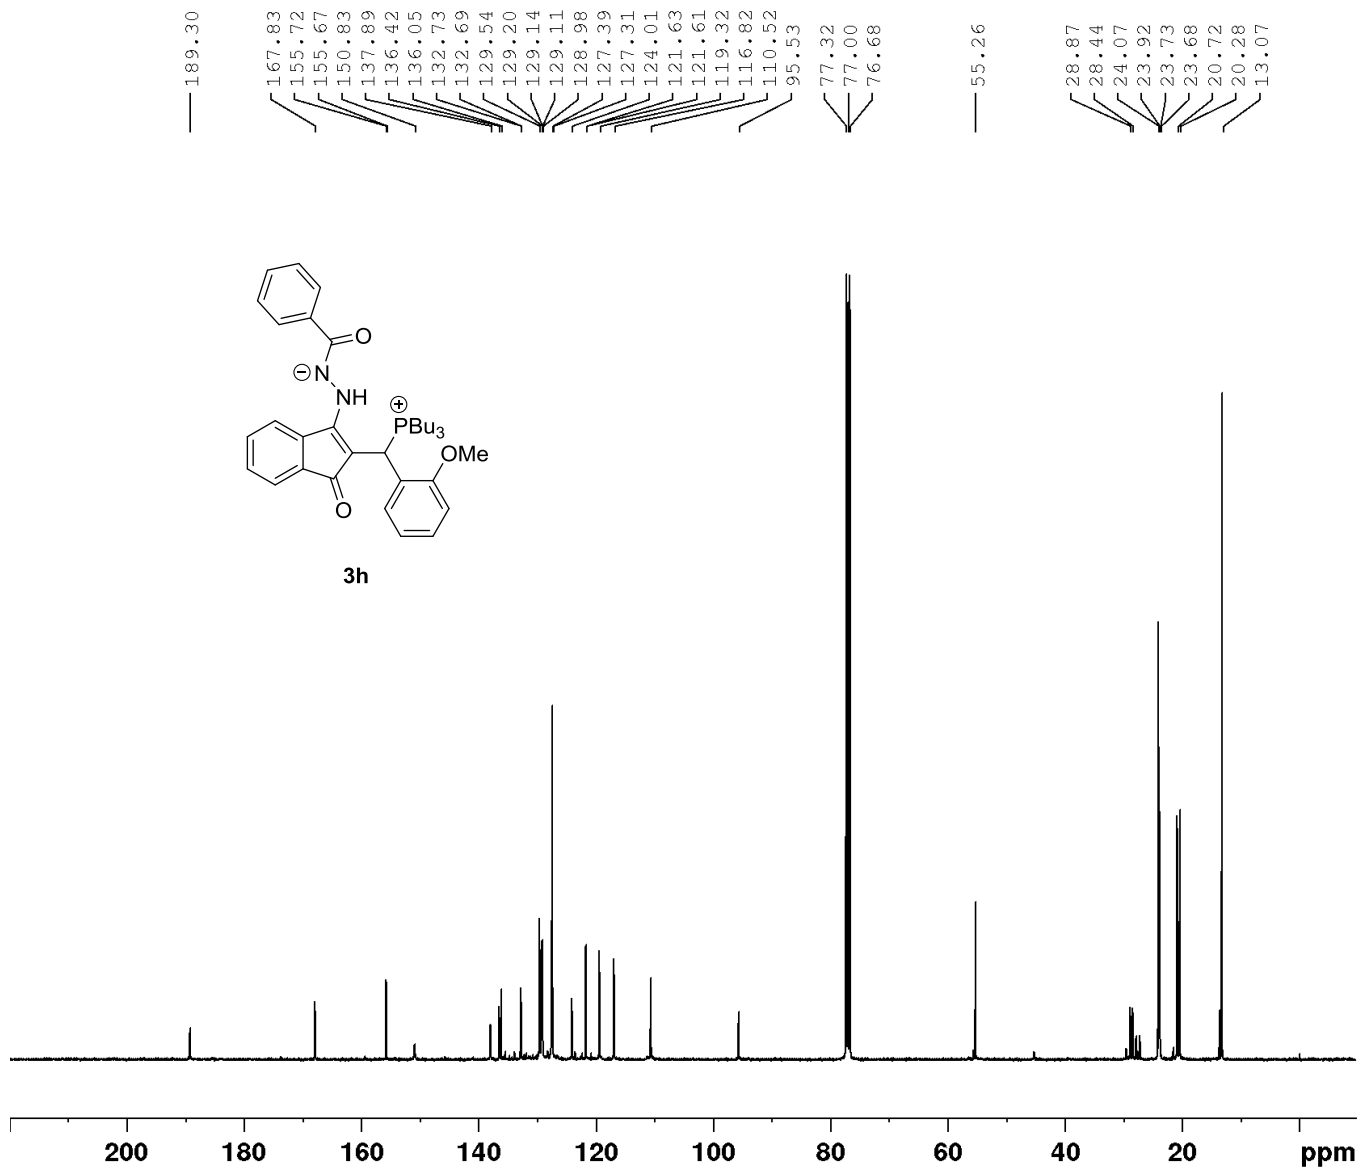

Current Data Parameters  
 NAME SW ZW 2 OMe  
 EXPNO 2  
 PROCNO 1

F2 - Acquisition Parameters  
 Date\_ 20200613  
 Time 23.29  
 INSTRUM spect  
 PROBHD 5 mm BBO BB-1H  
 PULPROG zgpg30  
 TD 32768  
 SOLVENT CDCl3  
 NS 14590  
 DS 0  
 SWH 24038.461 Hz  
 FIDRES 0.733596 Hz  
 AQ 0.6815744 sec  
 RG 4096  
 DW 20.800 usec  
 DE 6.50 usec  
 TE 297.7 K  
 D1 2.00000000 sec  
 D11 0.03000000 sec  
 TDO 1

===== CHANNEL f1 =====  
 NUC1 13C  
 P1 10.00 usec  
 PL1 3.80 dB  
 SFO1 100.6233325 MHz

===== CHANNEL f2 =====  
 CPDPRG[2] waltz16  
 NUC2 1H  
 PCPD2 90.00 usec  
 PL2 10.20 dB  
 PL12 26.00 dB  
 PL13 29.00 dB  
 SFO2 400.1316005 MHz

F2 - Processing parameters  
 SI 32768  
 SF 100.6127815 MHz  
 WDW EM  
 SSB 0  
 LB 1.00 Hz  
 GB 0  
 PC 1.00

<sup>31</sup>P NMR Spectrum of 3h (CDCl<sub>3</sub>, 162 MHz)

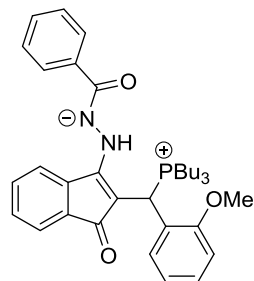

**3h**

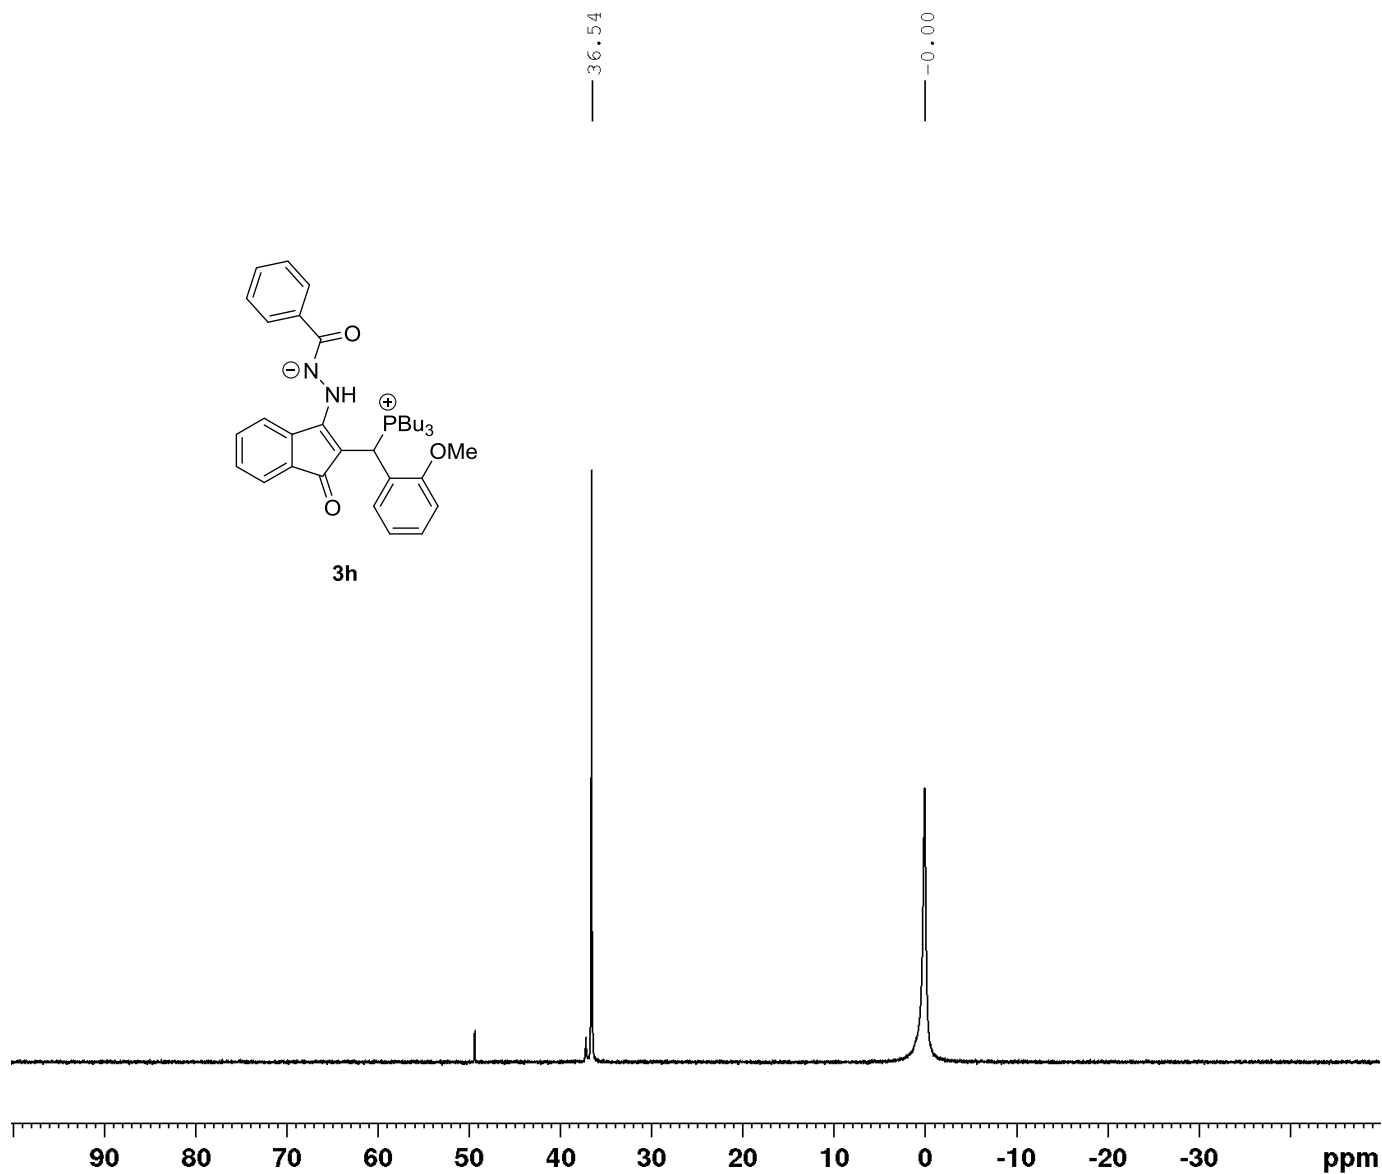

Current Data Parameters  
NAME SW ZW 2 Ome  
EXPNO 3  
PROCNO 1

F2 - Acquisition Parameters  
Date\_ 20200614  
Time 10.51  
INSTRUM spect  
PROBHD 5 mm BBO BB-1H  
PULPROG zgpg30  
TD 65536  
SOLVENT CDCl3  
NS 32  
DS 0  
SWH 64724.918 Hz  
FIDRES 0.987624 Hz  
AQ 0.5062656 sec  
RG 4096  
DW 7.725 usec  
DE 6.50 usec  
TE 298.1 K  
D1 2.00000000 sec  
D11 0.03000000 sec  
TDO 1

===== CHANNEL f1 =====  
NUC1 31P  
P1 15.40 usec  
PL1 10.90 dB  
SFO1 161.9674942 MHz

===== CHANNEL f2 =====  
CPDPRG[2] waltz16  
NUC2 1H  
PCPD2 90.00 usec  
PL2 10.20 dB  
PL12 26.00 dB  
PL13 29.00 dB  
SFO2 400.1316005 MHz

F2 - Processing parameters  
SI 32768  
SF 161.9755140 MHz  
WDW EM  
SSB 0  
LB 1.00 Hz  
GB 0  
PC 1.00

<sup>1</sup>H NMR Spectrum of **3i** (CDCl<sub>3</sub>, 400 MHz)

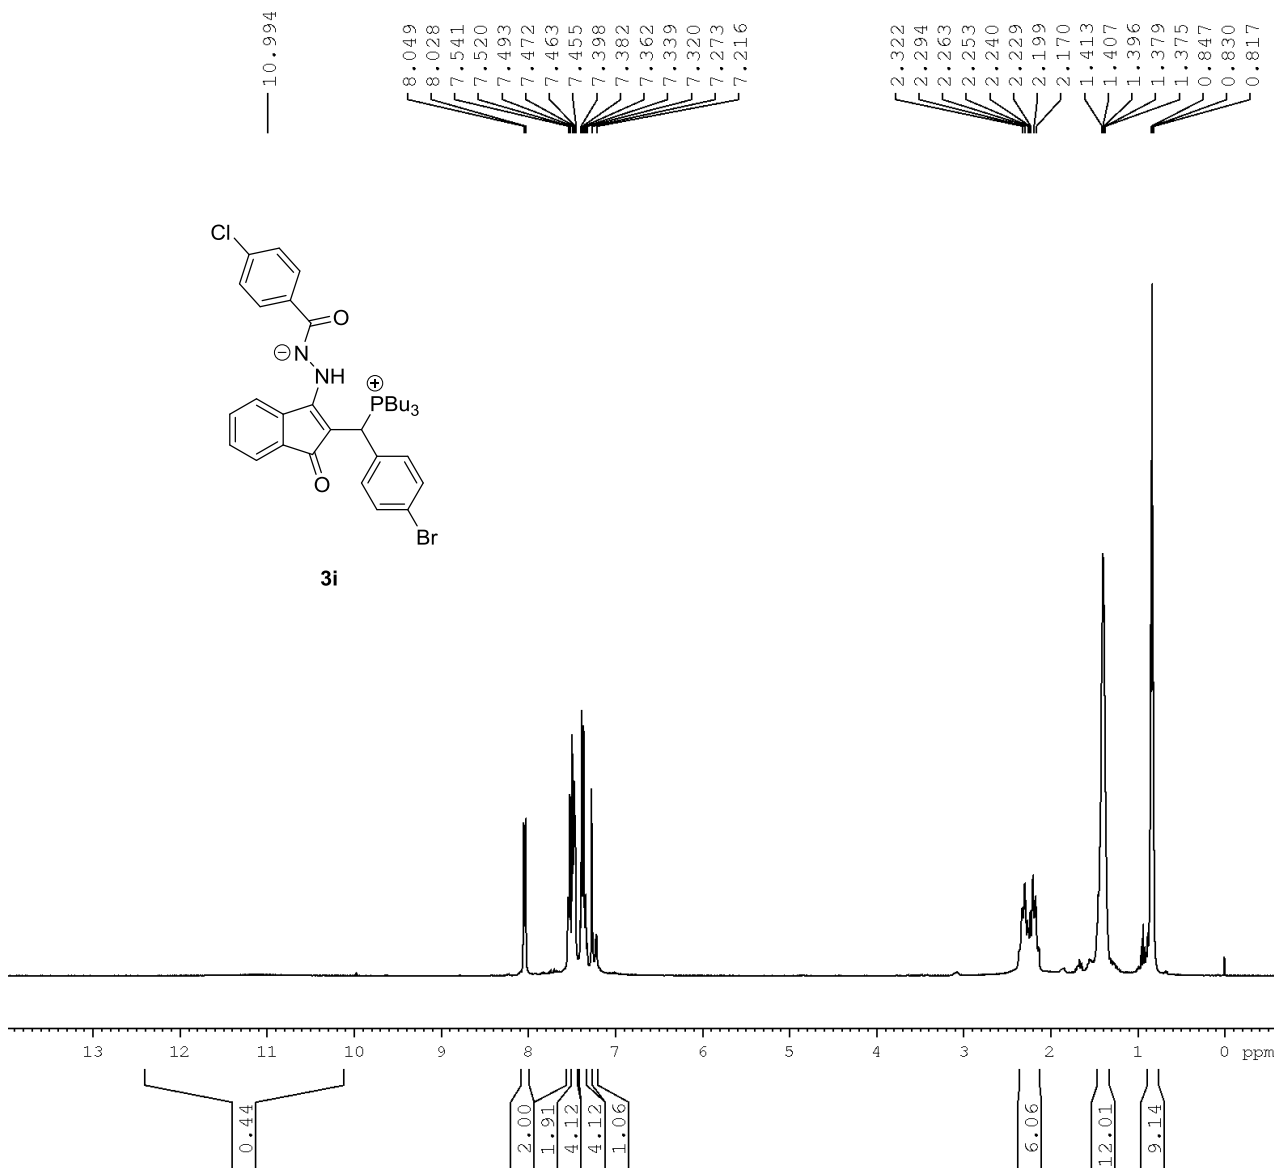

Current Data Parameters  
NAME SW ZW hy Cl  
EXPNO 1  
PROCNO 1

F2 - Acquisition Parameters  
Date\_ 20200531  
Time 1.32  
INSTRUM spect  
PROBHD 5 mm PABBO BB/  
PULPROG zg30  
TD 32768  
SOLVENT CDCl3  
NS 64  
DS 0  
SWH 7211.539 Hz  
FIDRES 0.220079 Hz  
AQ 2.2719147 sec  
RG 71.42  
DW 69.333 usec  
DE 10.06 usec  
TE 293.9 K  
D1 2.00000000 sec  
TD0 1

===== CHANNEL f1 =====  
SF01 400.1324008 MHz  
NUC1 1H  
P1 15.00 usec  
PLW1 11.39999962 W

F2 - Processing parameters  
SI 16384  
SF 400.1300045 MHz  
WDW EM  
SSB 0  
LB 0 Hz  
GB 0  
PC 1.00

<sup>13</sup>C NMR Spectrum of **3i** (CDCl<sub>3</sub>, 100 MHz)

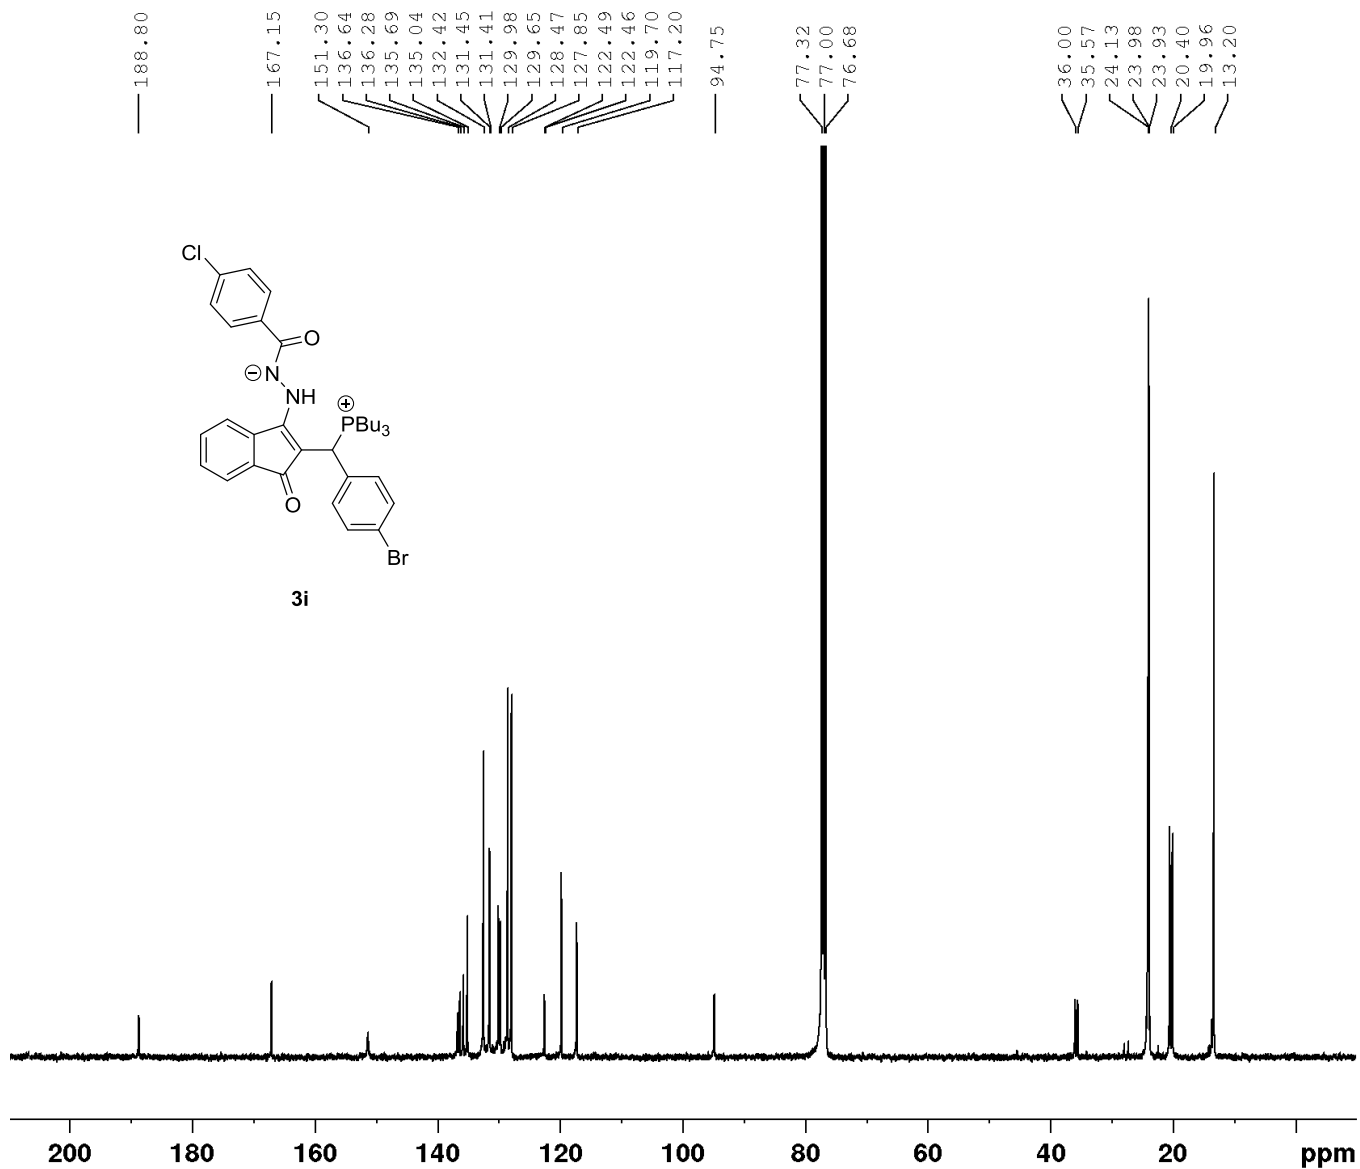

Current Data Parameters  
NAME SW ZW hy Cl  
EXPNO 2  
PROCNO 1

F2 - Acquisition Parameters  
Date\_ 20200531  
Time 1.37  
INSTRUM spect  
PROBHD 5 mm PABBO BB/  
PULPROG zgpg30  
TD 32768  
SOLVENT CDCl3  
NS 15000  
DS 0  
SWH 24038.461 Hz  
FIDRES 0.733596 Hz  
AQ 0.6815744 sec  
RG 198.09  
DW 20.800 usec  
DE 6.50 usec  
TE 293.8 K  
D1 2.00000000 sec  
D11 0.03000000 sec  
TD0 1

===== CHANNEL f1 =====  
SFO1 100.6228298 MHz  
NUC1 13C  
P1 10.00 usec  
PLW1 49.50000000 W

===== CHANNEL f2 =====  
SFO2 400.1316005 MHz  
NUC2 1H  
CPDPRG[2] waltz16  
PCPD2 90.00 usec  
PLW2 12.50000000 W  
PLW12 0.34722000 W  
PLW13 0.28125000 W

F2 - Processing parameters  
SI 32768  
SF 100.6127723 MHz  
WDW EM  
SSB 0  
LB 2.00 Hz  
GB 0  
PC 1.00

<sup>31</sup>P NMR Spectrum of **3i** (CDCl<sub>3</sub>, 162 MHz)

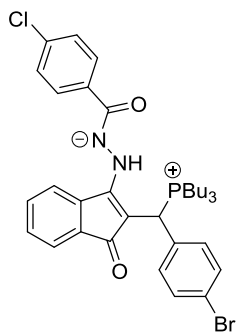

**3i**

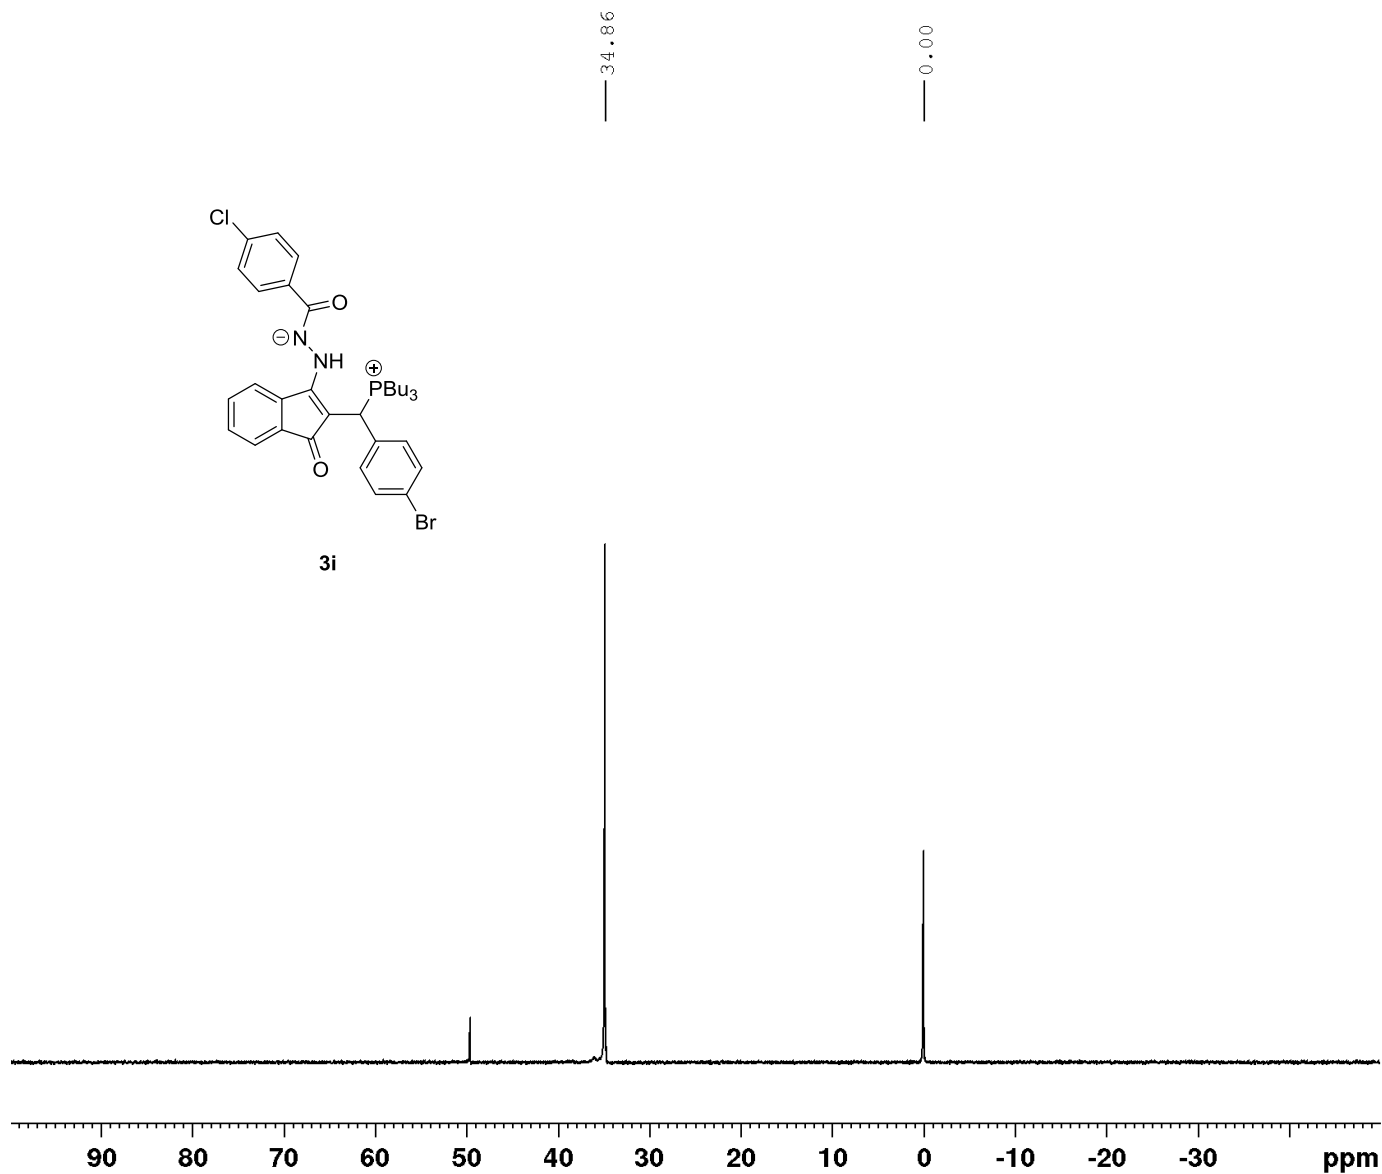

Current Data Parameters  
NAME SW ZW hy Cl  
EXPNO 3  
PROCNO 1

F2 - Acquisition Parameters  
Date\_ 20200601  
Time 15.23  
INSTRUM spect  
PROBHD 5 mm PABBO BB/  
PULPROG zgpg30  
TD 65536  
SOLVENT CDCl3  
NS 32  
DS 4  
SWH 49019.609 Hz  
FIDRES 0.747980 Hz  
AQ 0.6684672 sec  
RG 198.09  
DW 10.200 usec  
DE 6.50 usec  
TE 292.7 K  
D1 2.00000000 sec  
D11 0.03000000 sec  
TD0 1

===== CHANNEL f1 =====  
SFO1 161.9836917 MHz  
NUC1 31P  
P1 15.00 usec  
PLW1 13.19999981 W

===== CHANNEL f2 =====  
SFO2 400.1316005 MHz  
NUC2 1H  
CPDPRG[2] waltz16  
PCPD2 90.00 usec  
PLW2 12.50000000 W  
PLW12 0.34722000 W  
PLW13 0.28125000 W

F2 - Processing parameters  
SI 32768  
SF 161.9755132 MHz  
WDW EM  
SSB 0  
LB 2.00 Hz  
GB 0  
PC 1.40

<sup>1</sup>H NMR Spectrum of **3j** (CDCl<sub>3</sub>, 400 MHz)

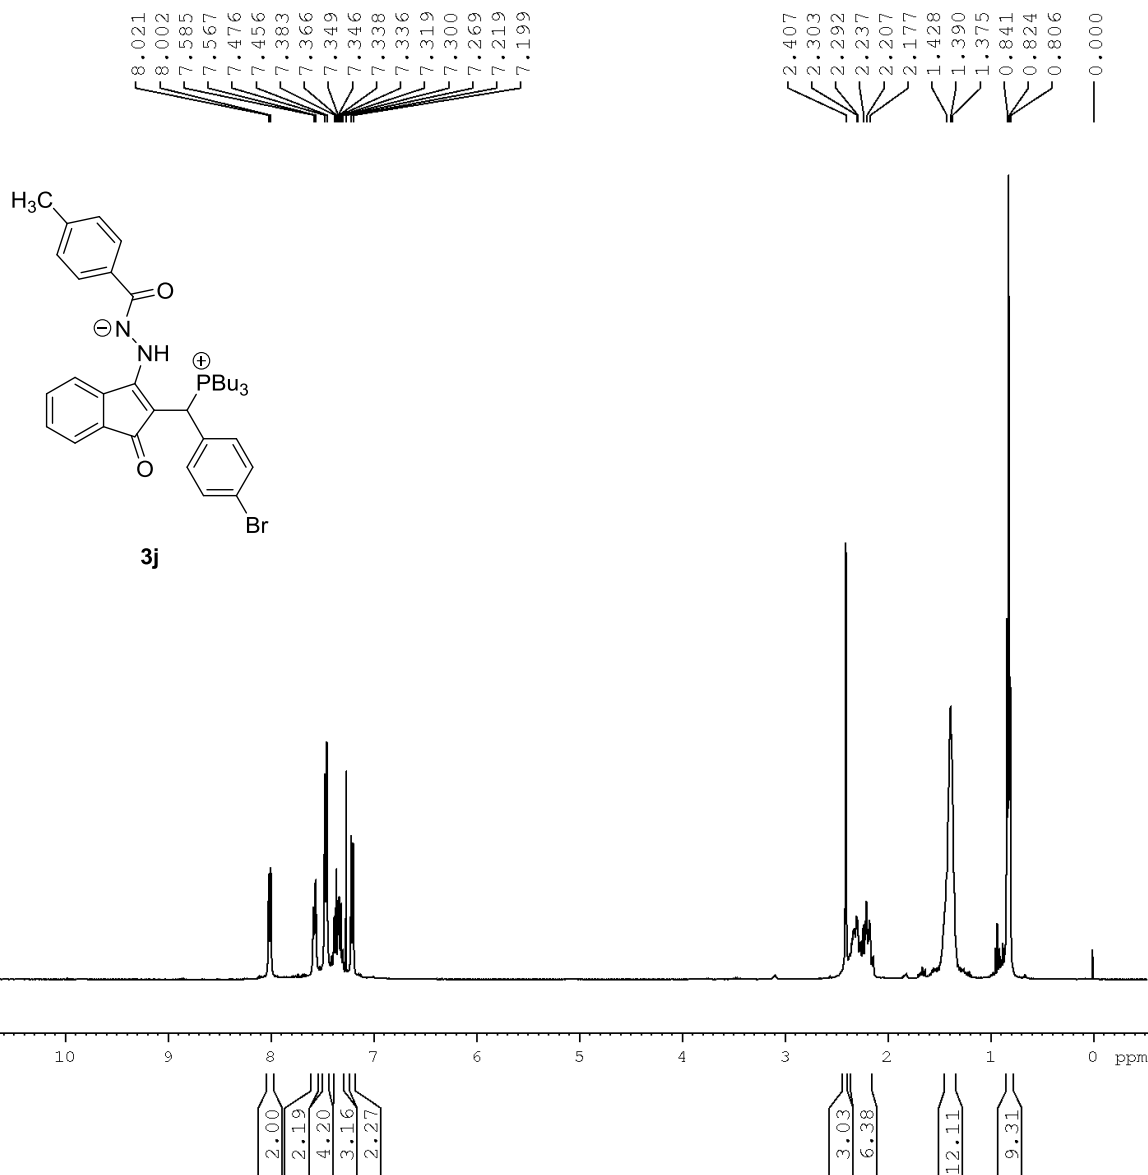

Current Data Parameters  
 NAME SW ZW hy CH3  
 EXPNO 1  
 PROCNO 1

F2 - Acquisition Parameters  
 Date\_ 20200530  
 Time 21.26  
 INSTRUM spect  
 PROBHD 5 mm PABBO BB/  
 PULPROG zg30  
 TD 32768  
 SOLVENT CDCl3  
 NS 32  
 DS 0  
 SWH 7211.539 Hz  
 FIDRES 0.220079 Hz  
 AQ 2.2719147 sec  
 RG 71.42  
 DW 69.333 usec  
 DE 10.06 usec  
 TE 298.0 K  
 D1 2.00000000 sec  
 TDO 1

==== CHANNEL f1 =====  
 SFO1 400.1324008 MHz  
 NUC1 1H  
 P1 15.00 usec  
 PLW1 11.39999962 W

F2 - Processing parameters  
 SI 16384  
 SF 400.1300061 MHz  
 WDW EM  
 SSB 0  
 LB 0 Hz  
 GB 0  
 PC 1.00



<sup>13</sup>C NMR Spectrum of **3j** (CDCl<sub>3</sub>, 100 MHz)

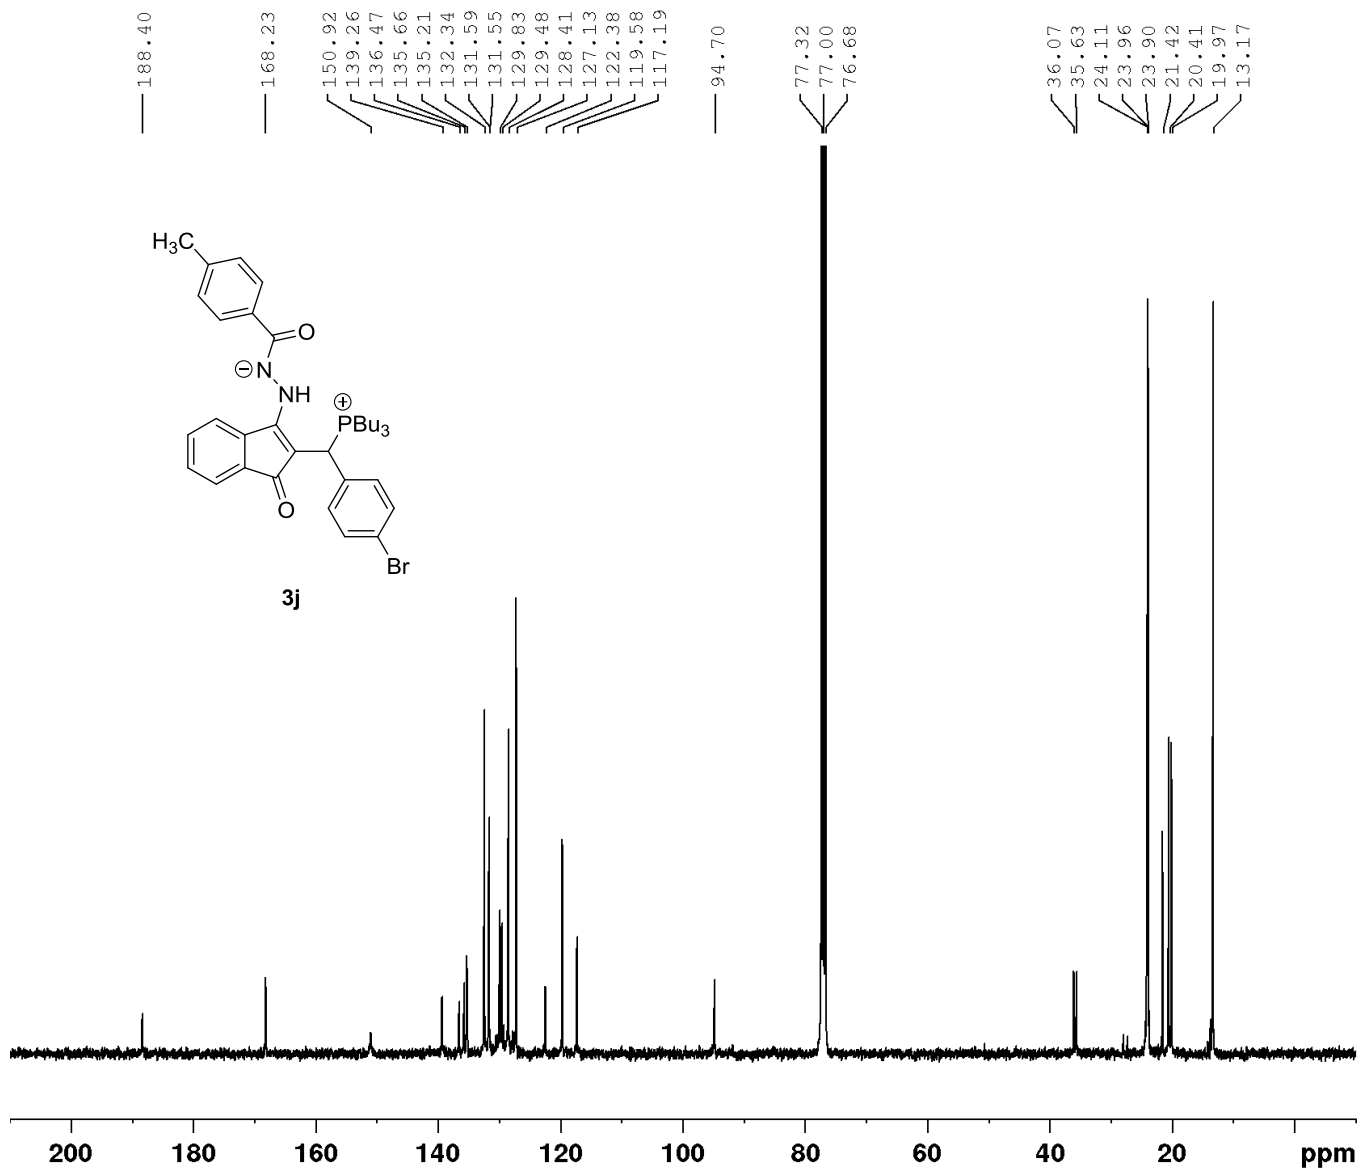

Current Data Parameters  
NAME SW ZW hy CH3  
EXPNO 2  
PROCNO 1

F2 - Acquisition Parameters  
Date\_ 20200530  
Time 21.29  
INSTRUM spect  
PROBHD 5 mm PABBO BB/  
PULPROG zgpg30  
TD 32768  
SOLVENT CDCl3  
NS 5199  
DS 0  
SWH 24038.461 Hz  
FIDRES 0.733596 Hz  
AQ 0.6815744 sec  
RG 198.09  
DW 20.800 usec  
DE 6.50 usec  
TE 298.1 K  
D1 2.00000000 sec  
D11 0.03000000 sec  
TD0 1

===== CHANNEL f1 =====  
SFO1 100.6228298 MHz  
NUC1 13C  
P1 10.00 usec  
PLW1 49.50000000 W

===== CHANNEL f2 =====  
SFO2 400.1316005 MHz  
NUC2 1H  
CPDPRG[2] waltz16  
PCPD2 90.00 usec  
PLW2 12.50000000 W  
PLW12 0.34722000 W  
PLW13 0.28125000 W

F2 - Processing parameters  
SI 32768  
SF 100.6127727 MHz  
WDW EM  
SSB 0  
LB 2.00 Hz  
GB 0  
PC 1.00

<sup>31</sup>P NMR Spectrum of 3j (CDCl<sub>3</sub>, 162 MHz)

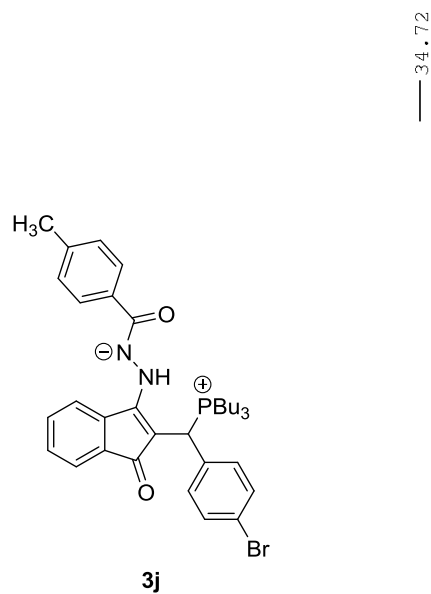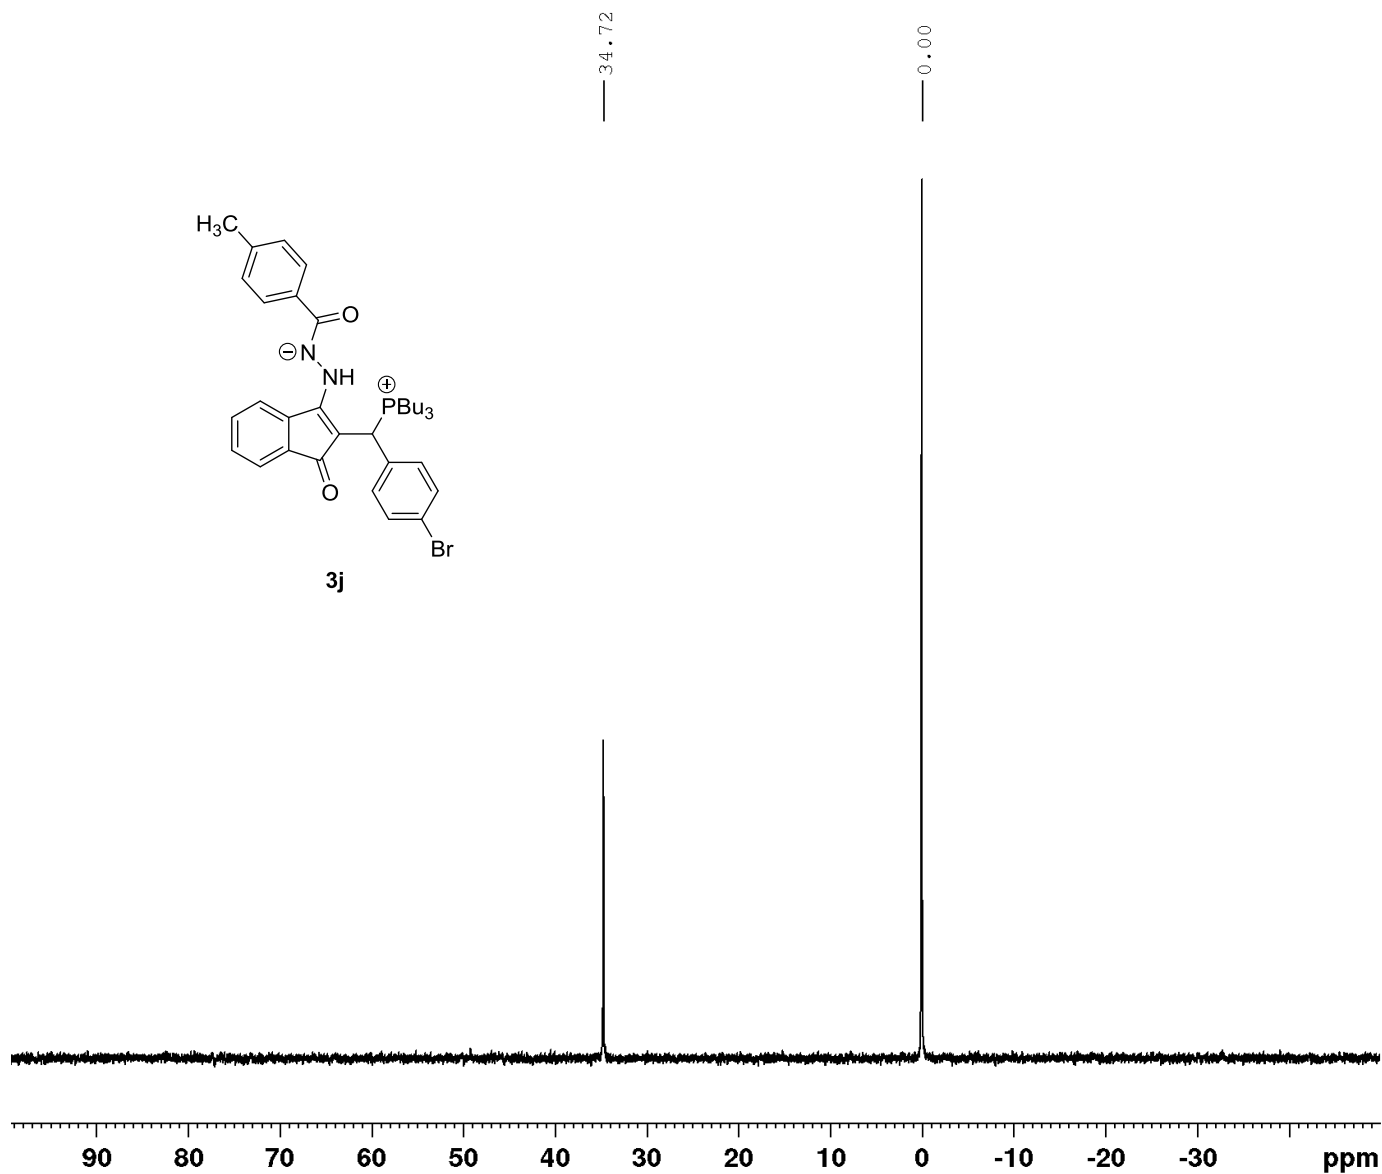

Current Data Parameters  
NAME SW ZW hy CH3  
EXPNO 5  
PROCNO 1

F2 - Acquisition Parameters  
Date\_ 20200601  
Time 16.59  
INSTRUM spect  
PROBHD 5 mm PABBO BB/  
PULPROG zgpg30  
TD 65536  
SOLVENT CDCl3  
NS 32  
DS 4  
SWH 49019.609 Hz  
FIDRES 0.747980 Hz  
AQ 0.6684672 sec  
RG 198.09  
DW 10.200 usec  
DE 6.50 usec  
TE 296.2 K  
D1 2.00000000 sec  
D11 0.03000000 sec  
TDO 1

=====  
CHANNEL f1  
SFO1 161.9836917 MHz  
NUC1 31P  
P1 15.00 usec  
PLW1 13.19999981 W

=====  
CHANNEL f2  
SFO2 400.1316005 MHz  
NUC2 1H  
CPDPRG[2] waltz16  
PCPD2 90.00 usec  
PLW2 12.50000000 W  
PLW12 0.34722000 W  
PLW13 0.28125000 W

F2 - Processing parameters  
SI 32768  
SF 161.9755126 MHz  
WDW EM  
SSB 0  
LB 2.00 Hz  
GB 0  
PC 1.40

<sup>1</sup>H NMR Spectrum of **6aa** (CDCl<sub>3</sub>, 400 MHz)

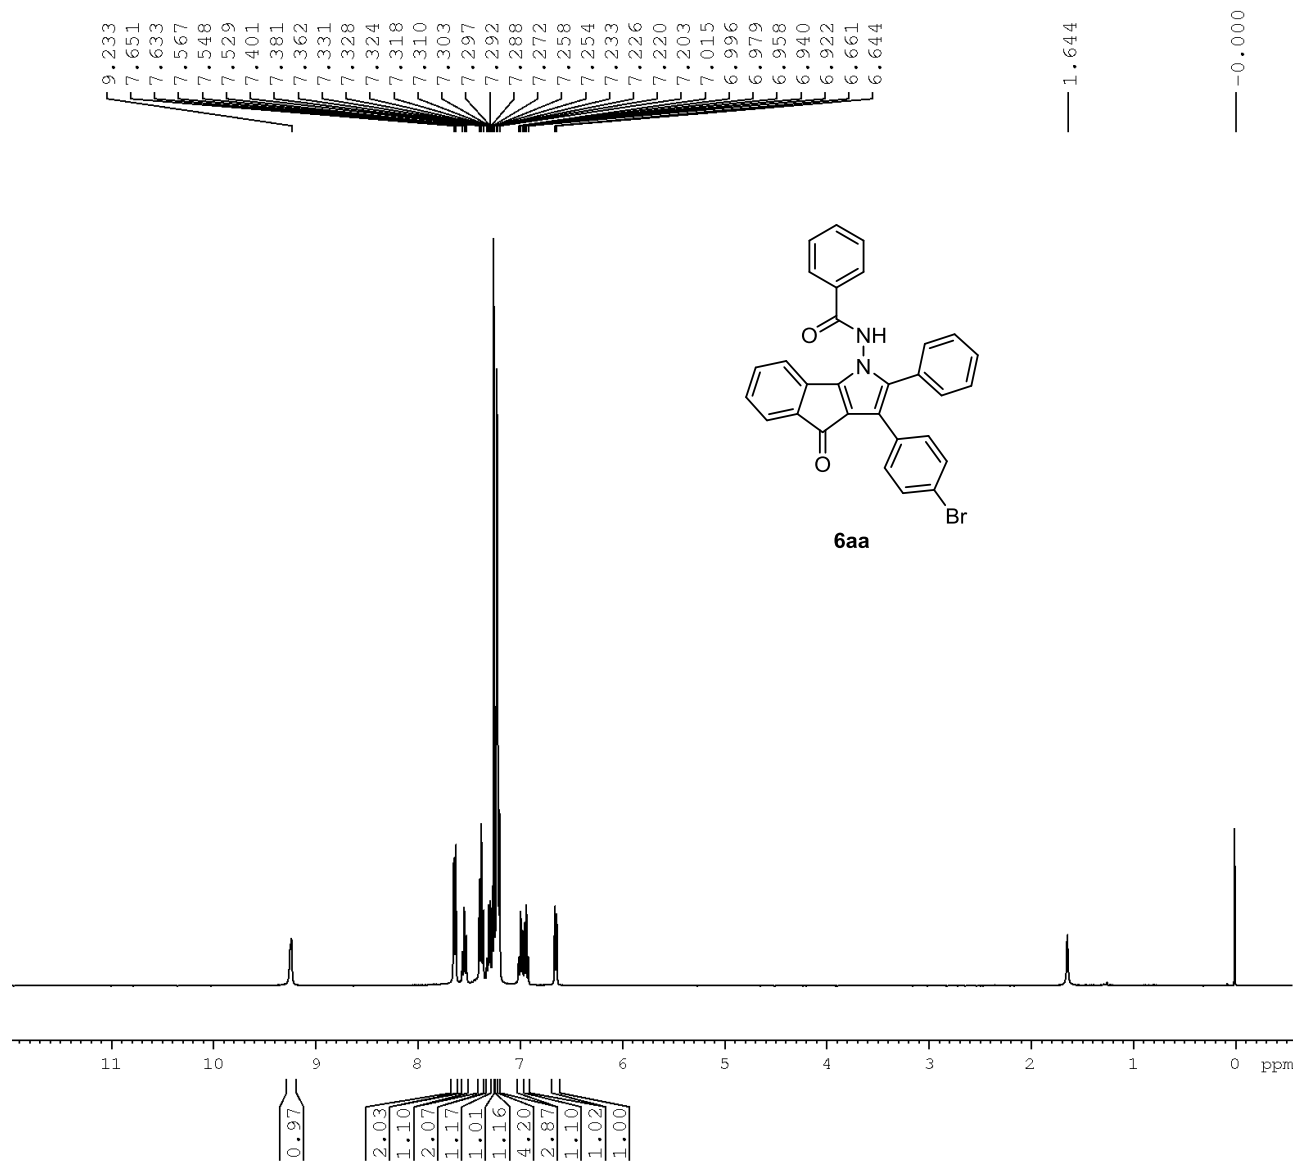

Current Data Parameters  
NAME SW-bc Ph Zi 4Br  
EXPNO 2  
PROCNO 1

F2 - Acquisition Parameters  
Date\_ 20200523  
Time 18.20  
INSTRUM spect  
PROBHD 5 mm PABBO BB/  
PULPROG zg30  
TD 32768  
SOLVENT CDCl3  
NS 32  
DS 0  
SWH 7211.539 Hz  
FIDRES 0.220079 Hz  
AQ 2.2719147 sec  
RG 177.16  
DW 69.333 usec  
DE 10.06 usec  
TE 298.0 K  
D1 2.00000000 sec  
TD0 1

==== CHANNEL f1 =====  
SFO1 400.1324008 MHz  
NUC1 1H  
P1 15.00 usec  
PLW1 11.39999962 W

F2 - Processing parameters  
SI 16384  
SF 400.1300105 MHz  
WDW EM  
SSB 0  
LB 0 Hz  
GB 0  
PC 1.00

<sup>13</sup>C NMR Spectrum of **6aa** (CDCl<sub>3</sub>, 100 MHz)

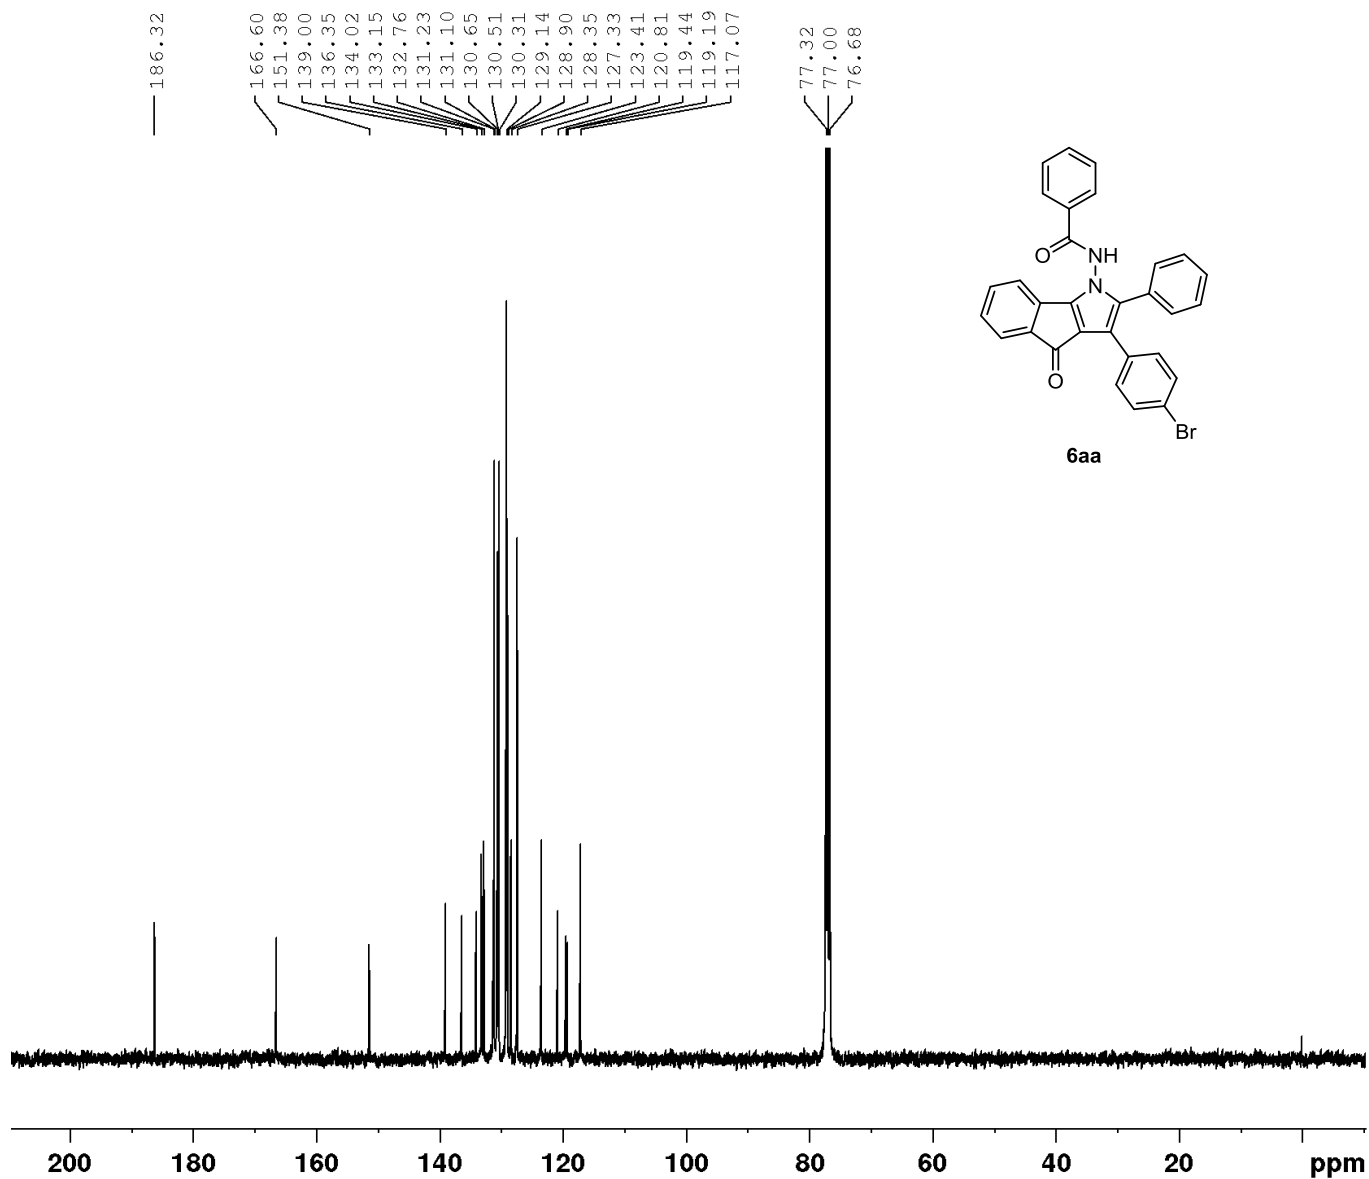

Current Data Parameters  
NAME SW-bc Ph Zi 4Br  
EXPNO 3  
PROCNO 1

F2 - Acquisition Parameters  
Date\_ 20200523  
Time 18.23  
INSTRUM spect  
PROBHD 5 mm PABBO BB/  
PULPROG zgpg30  
TD 32768  
SOLVENT CDCl3  
NS 4171  
DS 0  
SWH 24038.461 Hz  
FIDRES 0.733596 Hz  
AQ 0.6815744 sec  
RG 198.09  
DW 20.800 usec  
DE 6.50 usec  
TE 298.0 K  
D1 2.00000000 sec  
D11 0.03000000 sec  
TD0 1

==== CHANNEL f1 =====  
SFO1 100.6228298 MHz  
NUC1 13C  
P1 10.00 usec  
PLW1 49.50000000 W

==== CHANNEL f2 =====  
SFO2 400.1316005 MHz  
NUC2 1H  
CPDPRG[2] waltz16  
PCPD2 90.00 usec  
PLW2 12.50000000 W  
PLW12 0.34722000 W  
PLW13 0.28125000 W

F2 - Processing parameters  
SI 32768  
SF 100.6127708 MHz  
WDW EM  
SSB 0  
LB 2.00 Hz  
GB 0  
PC 1.00

<sup>1</sup>H NMR Spectrum of 6ba (CDCl<sub>3</sub>, 400 MHz)

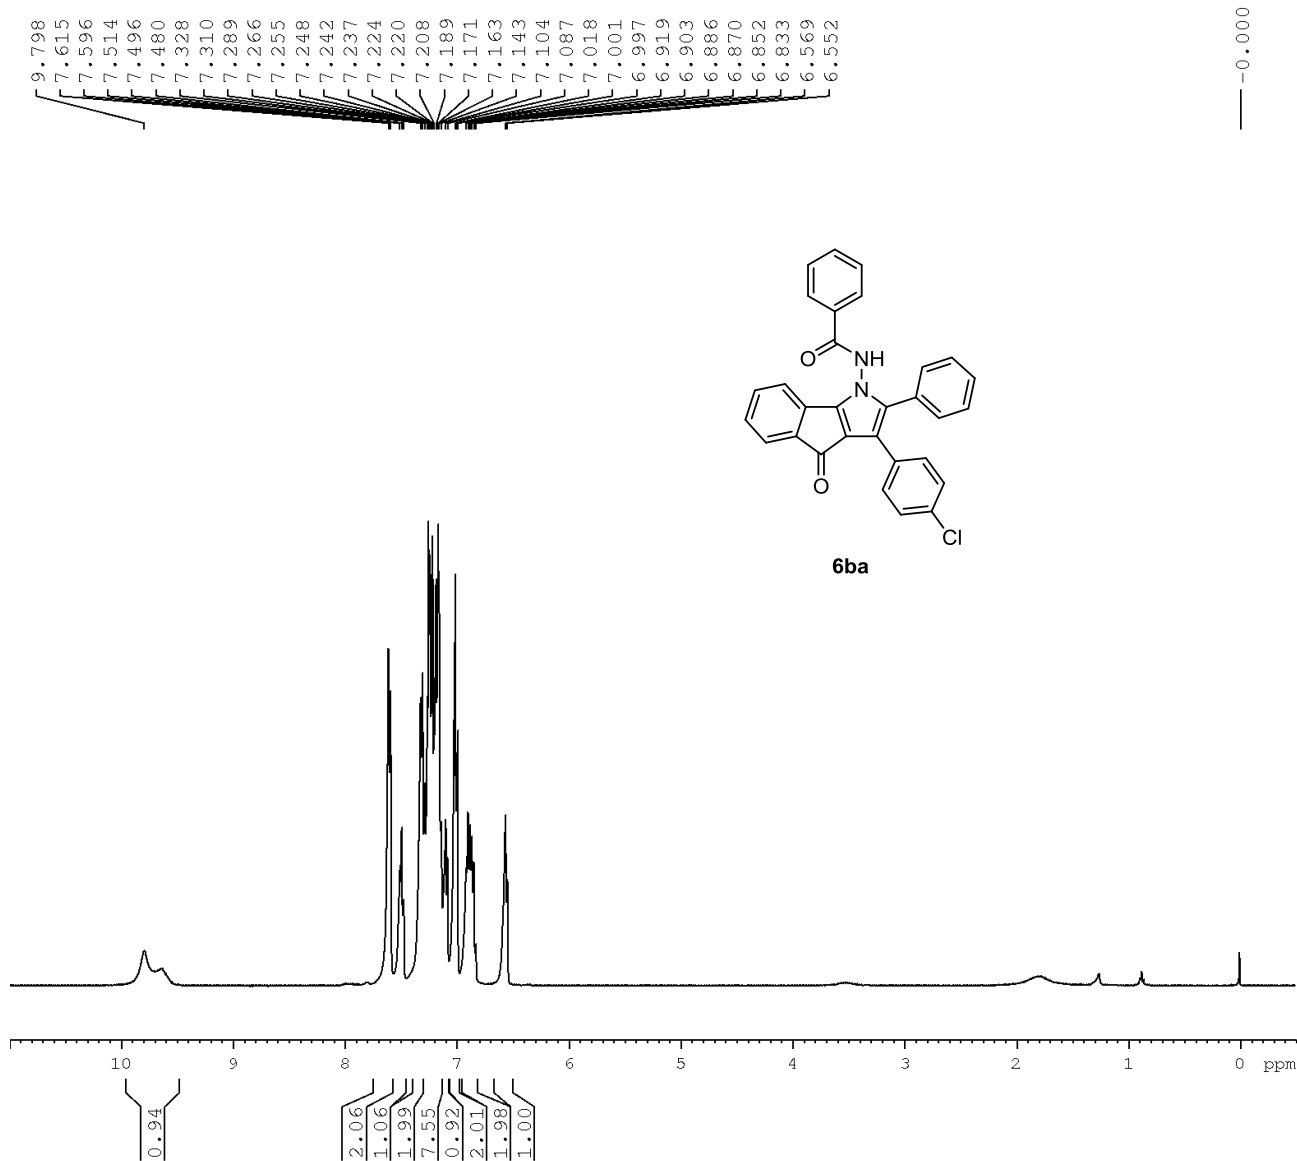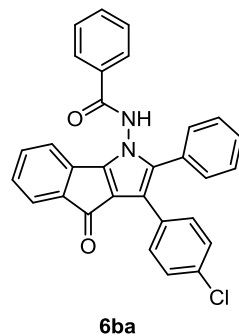

Current Data Parameters  
NAME SW Zi 4-C1  
EXPNO 2  
PROCNO 1

F2 - Acquisition Parameters  
Date\_ 20200325  
Time 21.55  
INSTRUM spect  
PROBHD 5 mm BBO BB-1H  
PULPROG zg30  
TD 32768  
SOLVENT CDCl3  
NS 32  
DS 0  
SWH 7246.377 Hz  
FIDRES 0.221142 Hz  
AQ 2.2609921 sec  
RG 114  
DW 69.000 usec  
DE 6.50 usec  
TE 295.6 K  
D1 2.00000000 sec  
TDO 1

==== CHANNEL f1 =====  
NUC1 1H  
P1 15.00 usec  
PL1 11.10 dB  
SFO1 400.1324008 MHz

F2 - Processing parameters  
SI 16384  
SF 400.1300106 MHz  
WDW EM  
SSB 0  
LB 0 Hz  
GB 0  
PC 1.00

<sup>13</sup>C NMR Spectrum of **6ba** (CDCl<sub>3</sub>, 100 MHz)

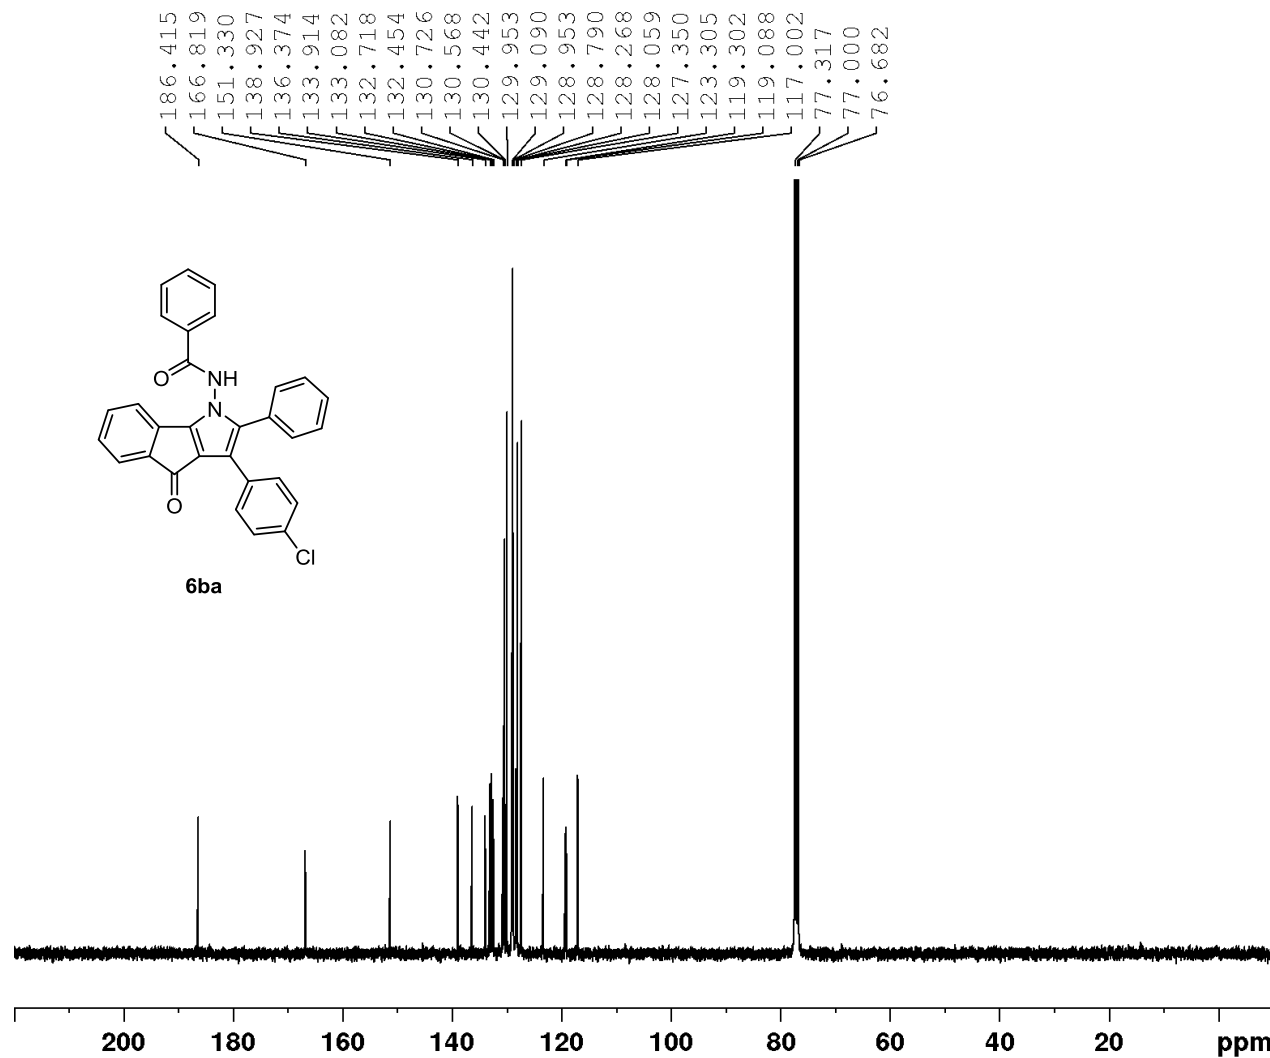

Current Data Parameters  
NAME SW Zi 4-Cl  
EXPNO 3  
PROCNO 1

F2 - Acquisition Parameters  
Date\_ 20200325  
Time 21.58  
INSTRUM spect  
PROBHD 5 mm BBO BB-1H  
PULPROG zgpg30  
TD 32768  
SOLVENT CDCl3  
NS 3483  
DS 0  
SWH 24038.461 Hz  
FIDRES 0.733596 Hz  
AQ 0.6815744 sec  
RG 5792.6  
DW 20.800 usec  
DE 6.50 usec  
TE 295.5 K  
D1 2.00000000 sec  
D11 0.03000000 sec  
TD0 1

==== CHANNEL f1 =====  
NUC1 13C  
P1 10.00 usec  
PL1 3.80 dB  
SFO1 100.6233325 MHz

==== CHANNEL f2 =====  
CPDPRG[2] waltz16  
NUC2 1H  
PCPD2 90.00 usec  
PL2 10.20 dB  
PL12 26.00 dB  
PL13 29.00 dB  
SFO2 400.1316005 MHz

F2 - Processing parameters  
SI 32768  
SF 100.6127728 MHz  
WDW EM  
SSB 0  
LB 1.00 Hz  
GB 0  
PC 1.00

<sup>1</sup>H NMR Spectrum of **6ca** (DMSO-d<sub>6</sub>, 400 MHz)

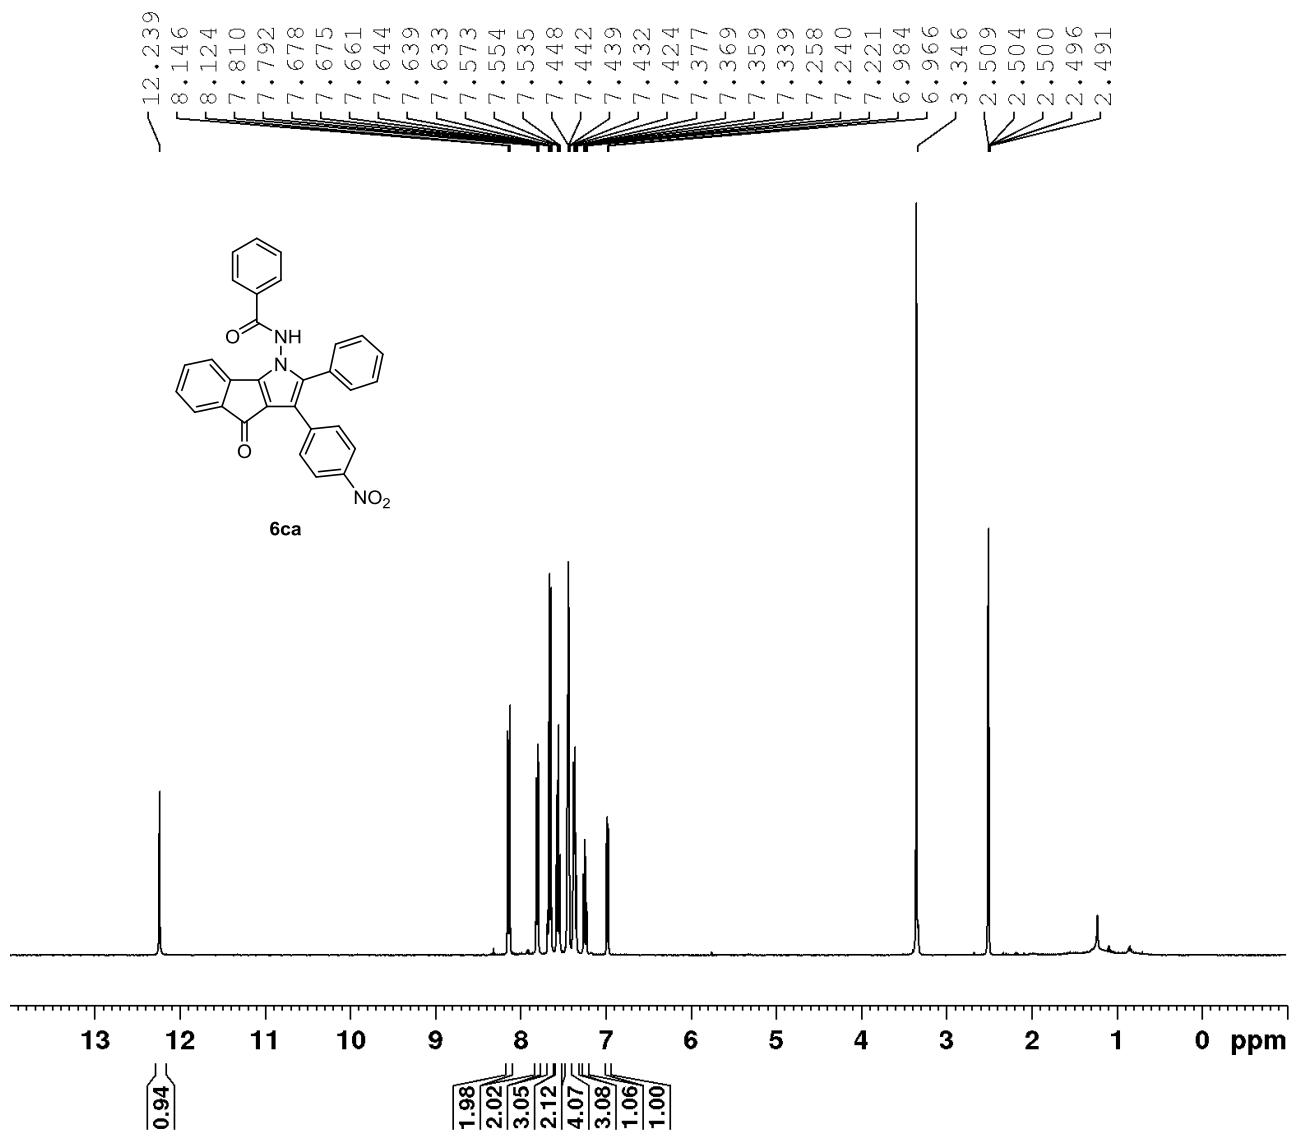

Current Data Parameters  
NAME zi 4-NO2  
EXPNO 1  
PROCNO 1

F2 - Acquisition Parameters  
Date\_ 20200222  
Time 16.11  
INSTRUM spect  
PROBHD 5 mm PABBO BB/  
PULPROG zg30  
TD 32768  
SOLVENT DMSO  
NS 16  
DS 0  
SWH 7211.539 Hz  
FIDRES 0.220079 Hz  
AQ 2.2719147 sec  
RG 89.08  
DW 69.333 usec  
DE 10.06 usec  
TE 296.2 K  
D1 2.00000000 sec  
TDO 1

==== CHANNEL f1 =====  
SFO1 400.1324008 MHz  
NUC1 1H  
P1 15.00 usec  
PLW1 11.39999962 W

F2 - Processing parameters  
SI 16384  
SF 400.1300031 MHz  
WDW EM  
SSB 0  
LB 0 Hz  
GB 0  
PC 1.00

<sup>13</sup>C NMR Spectrum of **6ca** (DMSO-d<sub>6</sub>, 100 MHz)

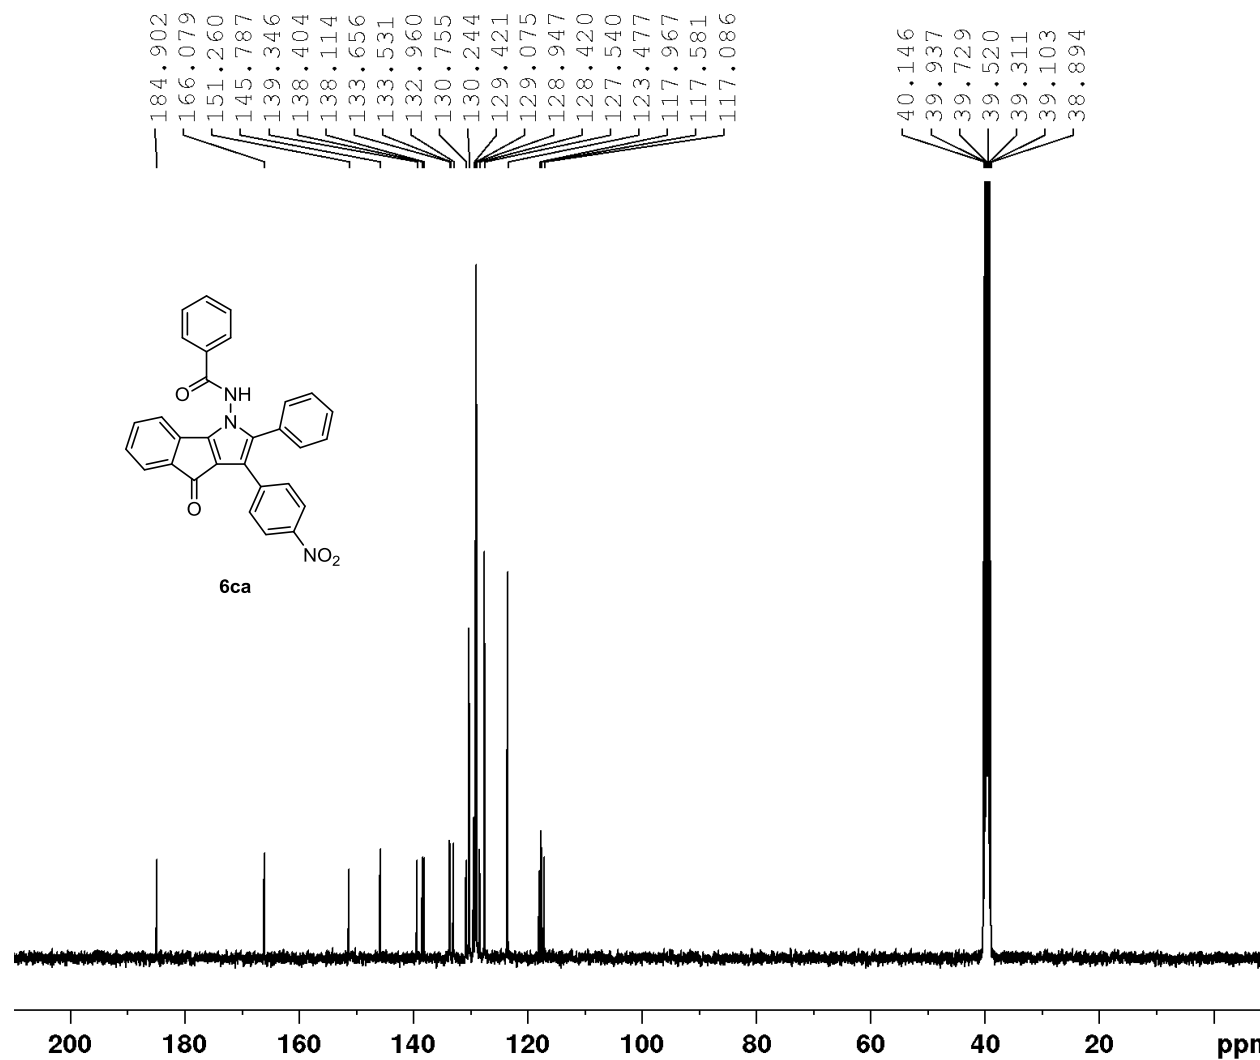

Current Data Parameters  
 NAME zi 4-NO2  
 EXPNO 2  
 PROCNO 1

F2 - Acquisition Parameters  
 Date\_ 20200222  
 Time 16.12  
 INSTRUM spect  
 PROBHD 5 mm PABBO BB/  
 PULPROG zgpg30  
 TD 32768  
 SOLVENT DMSO  
 NS 1174  
 DS 0  
 SWH 24038.461 Hz  
 FIDRES 0.733596 Hz  
 AQ 0.6815744 sec  
 RG 198.09  
 DW 20.800 usec  
 DE 6.50 usec  
 TE 296.6 K  
 D1 2.00000000 sec  
 D11 0.03000000 sec  
 TD0 1

==== CHANNEL f1 =====  
 SFO1 100.6228298 MHz  
 NUC1 13C  
 P1 10.00 usec  
 PLW1 49.50000000 W

==== CHANNEL f2 =====  
 SFO2 400.1316005 MHz  
 NUC2 1H  
 CPDPRG[2] waltz16  
 PCPD2 90.00 usec  
 PLW2 12.50000000 W  
 PLW12 0.34722000 W  
 PLW13 0.28125000 W

F2 - Processing parameters  
 SI 32768  
 SF 100.6128172 MHz  
 WDW EM  
 SSB 0  
 LB 2.00 Hz  
 GB 0  
 PC 1.00



<sup>1</sup>H NMR Spectrum of **6da** (DMSO-d<sub>6</sub>, 400 MHz)

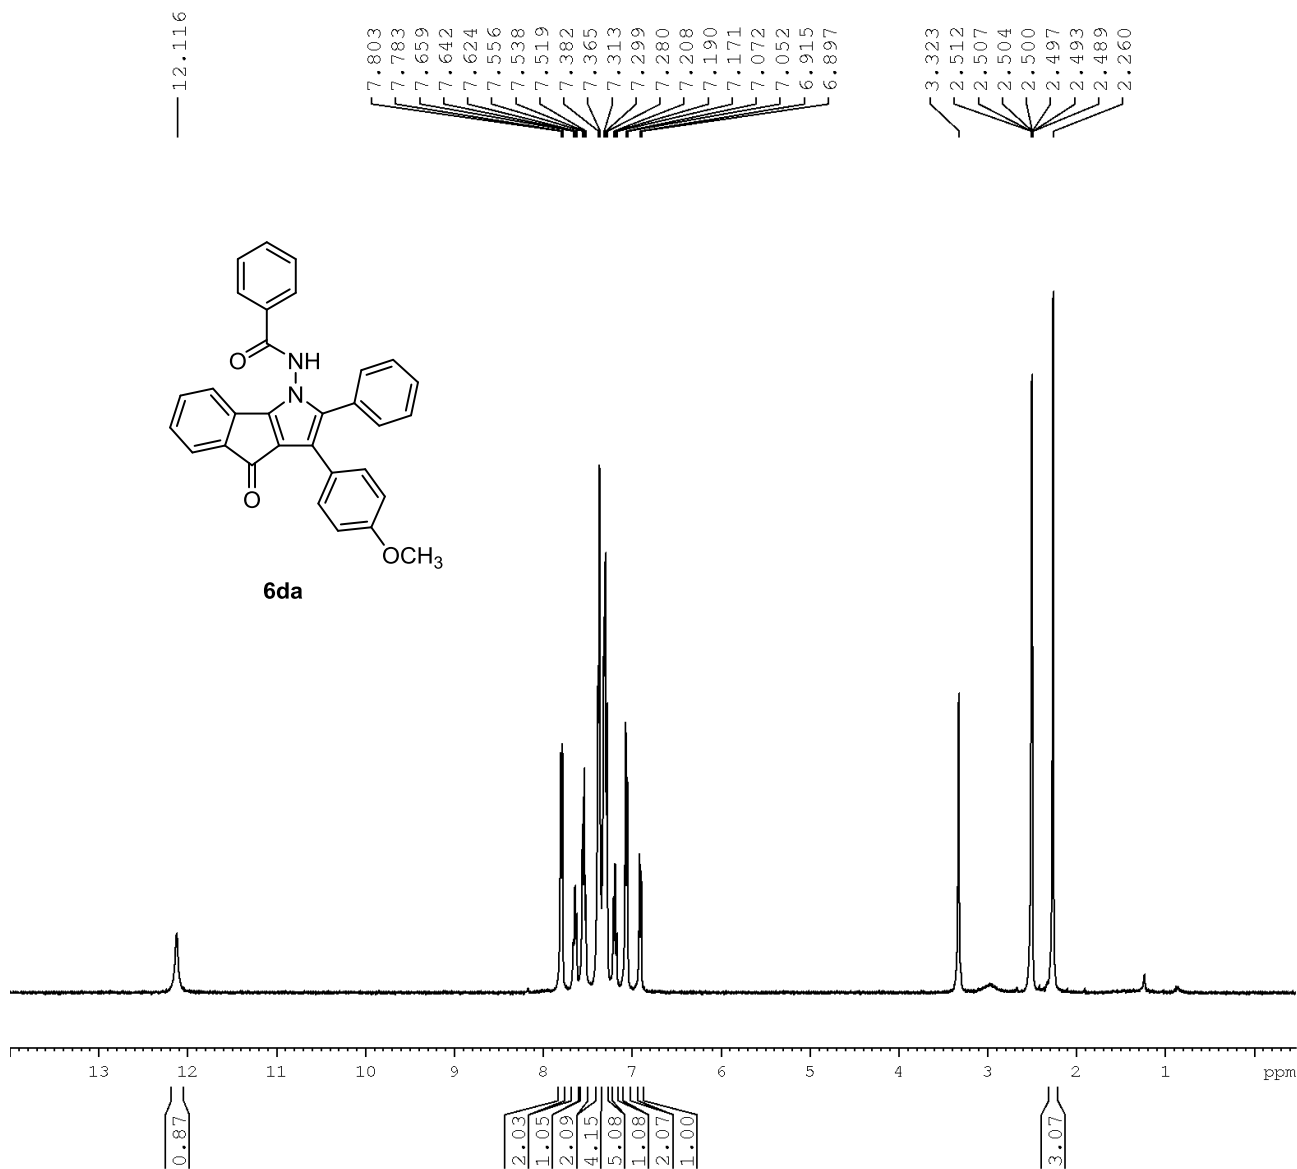

Current Data Parameters  
NAME SW Zi 4-OMe  
EXPNO 2  
PROCNO 1

F2 - Acquisition Parameters  
Date\_ 20200502  
Time 22.09  
INSTRUM spect  
PROBHD 5 mm BBO BB-1H  
PULPROG zg30  
TD 32768  
SOLVENT DMSO  
NS 32  
DS 0  
SWH 7246.377 Hz  
FIDRES 0.221142 Hz  
AQ 2.2609921 sec  
RG 362  
DW 69.000 usec  
DE 6.50 usec  
TE 296.8 K  
D1 2.00000000 sec  
TDO 1

==== CHANNEL f1 =====  
NUC1 1H  
P1 15.00 usec  
PL1 11.10 dB  
SFO1 400.1324008 MHz

F2 - Processing parameters  
SI 16384  
SF 400.1300067 MHz  
WDW EM  
SSB 0  
LB 0 Hz  
GB 0  
PC 1.00

<sup>13</sup>C NMR Spectrum of **6da** (DMSO-d<sub>6</sub>, 100 MHz)

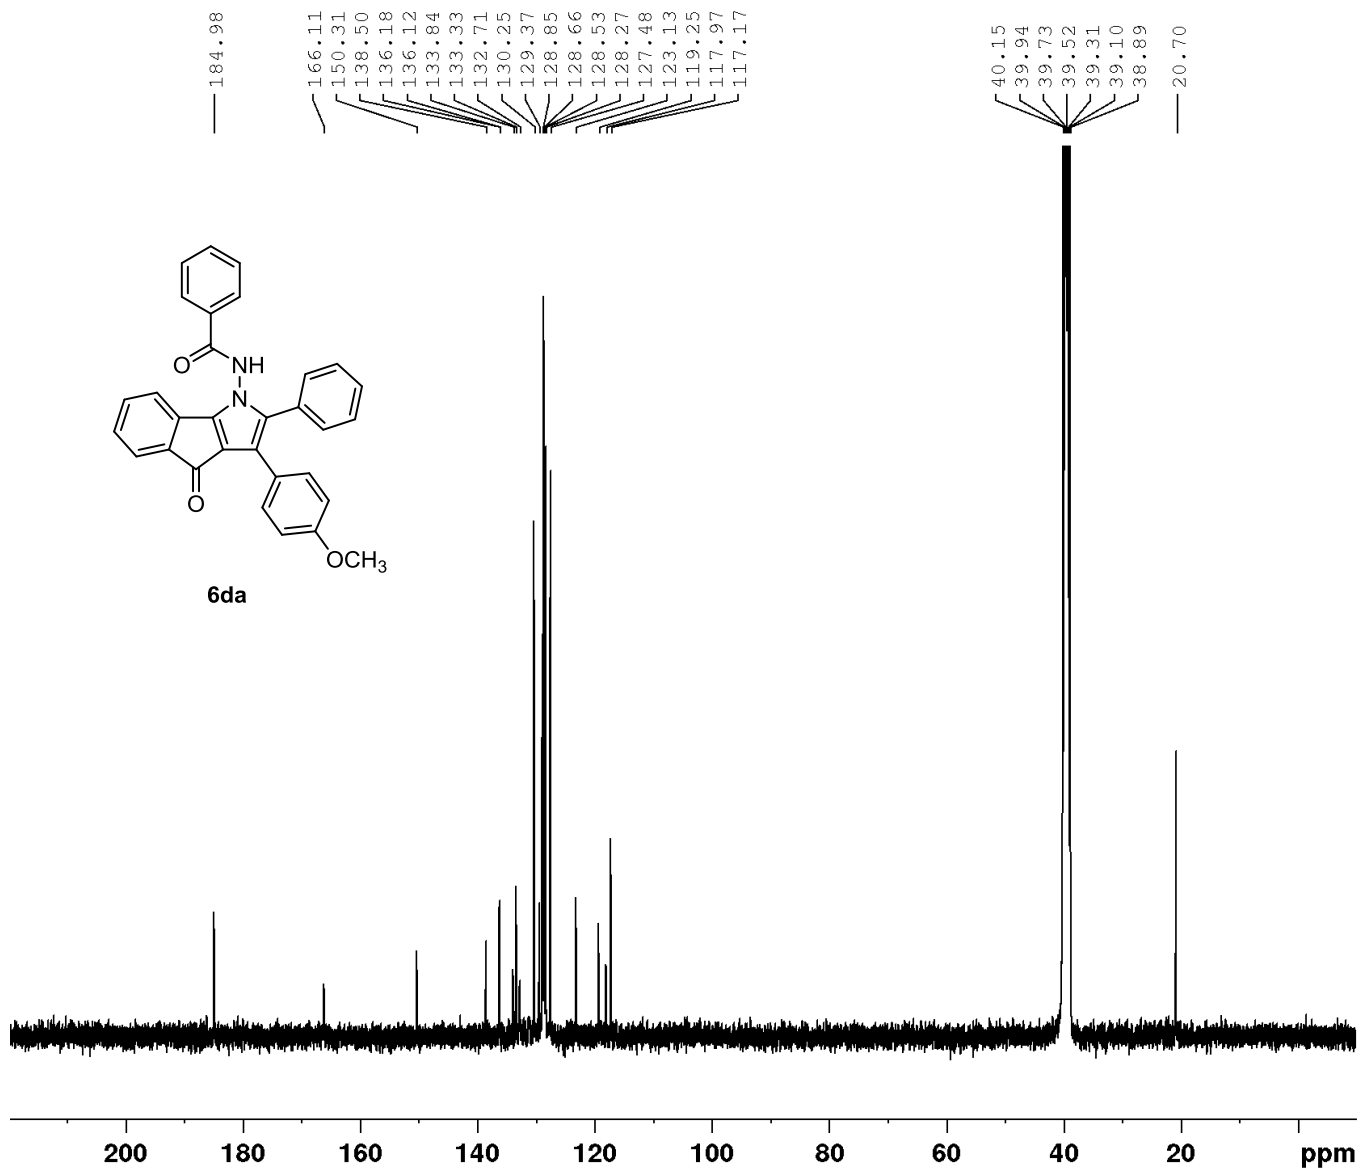

Current Data Parameters  
NAME SW Zi 4-OMe  
EXPNO 3  
PROCNO 1

F2 - Acquisition Parameters  
Date\_ 20200502  
Time 22.12  
INSTRUM spect  
PROBHD 5 mm BBO BB-1H  
PULPROG zgpg30  
TD 32768  
SOLVENT DMSO  
NS 23910  
DS 0  
SWH 24038.461 Hz  
FIDRES 0.733596 Hz  
AQ 0.6815744 sec  
RG 9195.2  
DW 20.800 usec  
DE 6.50 usec  
TE 296.7 K  
D1 2.00000000 sec  
D11 0.03000000 sec  
TD0 1

=====  
CHANNEL f1  
NUC1 13C  
P1 10.00 usec  
PL1 3.80 dB  
SFO1 100.6233325 MHz

=====  
CHANNEL f2  
CPDPRG[2] waltz16  
NUC2 1H  
PCPD2 90.00 usec  
PL2 10.20 dB  
PL12 26.00 dB  
PL13 29.00 dB  
SFO2 400.1316005 MHz

F2 - Processing parameters  
SI 32768  
SF 100.6128205 MHz  
WDW EM  
SSB 0  
LB 1.00 Hz  
GB 0  
PC 1.00

<sup>1</sup>H NMR Spectrum of **6ea** (DMSO-d<sub>6</sub>, 400 MHz)

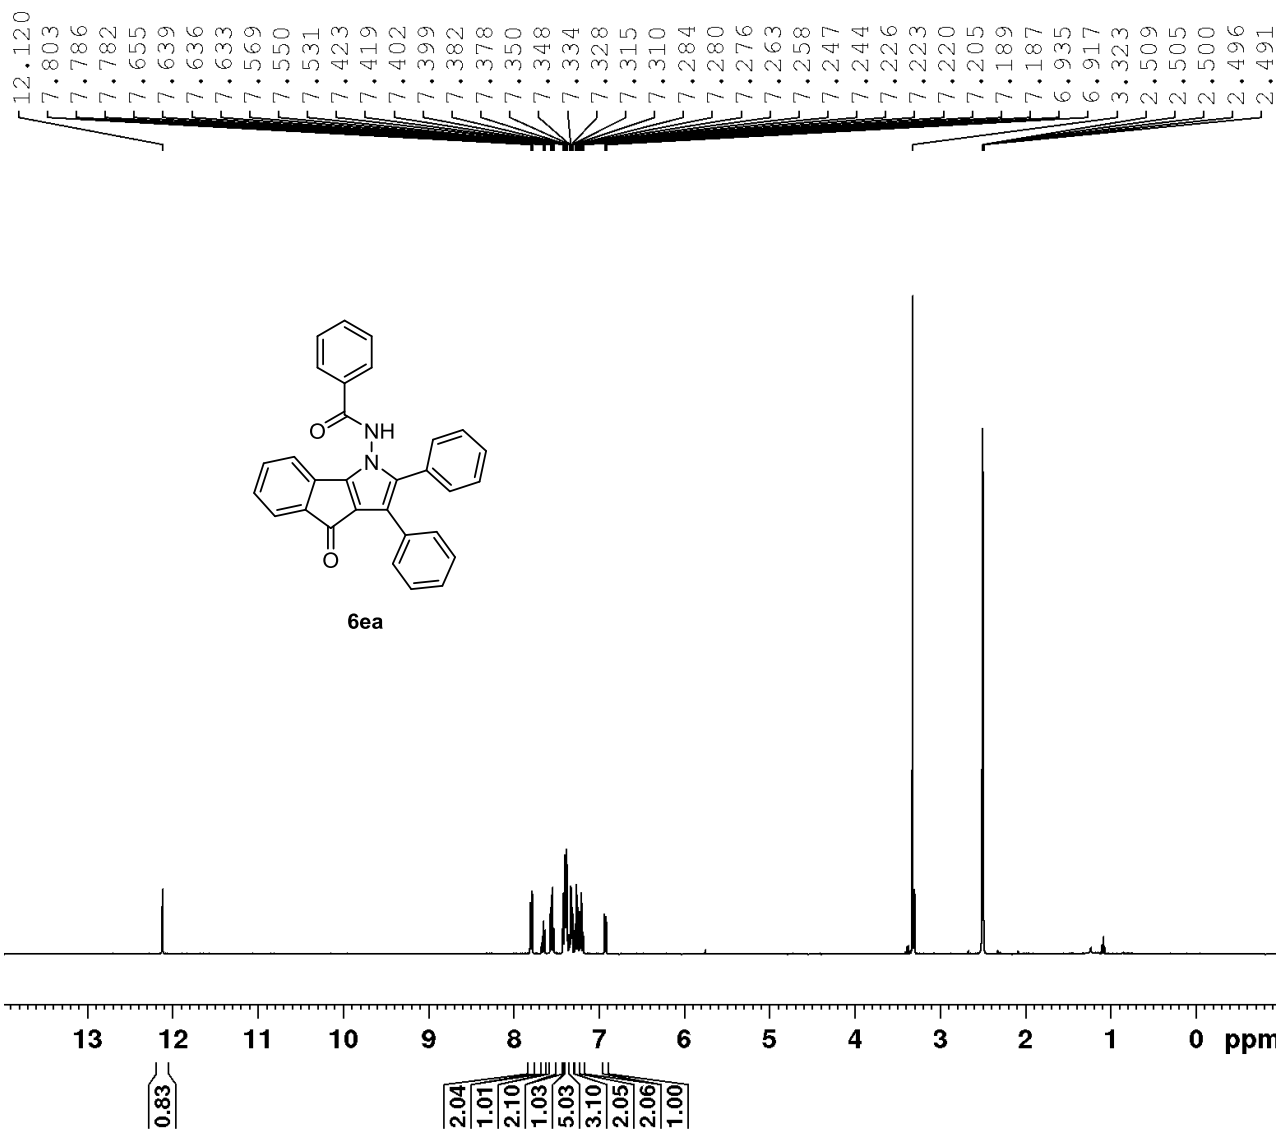

Current Data Parameters  
 NAME Zi Non sub iso  
 EXPNO 2  
 PROCNO 1

F2 - Acquisition Parameters  
 Date\_ 20200221  
 Time 21.10  
 INSTRUM spect  
 PROBHD 5 mm PABBO BB/  
 PULPROG zg30  
 TD 32768  
 SOLVENT DMSO  
 NS 16  
 DS 0  
 SWH 7211.539 Hz  
 FIDRES 0.220079 Hz  
 AQ 2.2719147 sec  
 RG 198.09  
 DW 69.333 usec  
 DE 10.06 usec  
 TE 297.5 K  
 D1 2.00000000 sec  
 TDO 1

==== CHANNEL f1 =====  
 SFO1 400.1324008 MHz  
 NUC1 1H  
 P1 15.00 usec  
 PLW1 11.39999962 W

F2 - Processing parameters  
 SI 16384  
 SF 400.1300031 MHz  
 WDW EM  
 SSB 0  
 LB 0 Hz  
 GB 0  
 PC 1.00

<sup>13</sup>C NMR Spectrum of **6ea** (DMSO-d<sub>6</sub>, 100 MHz)

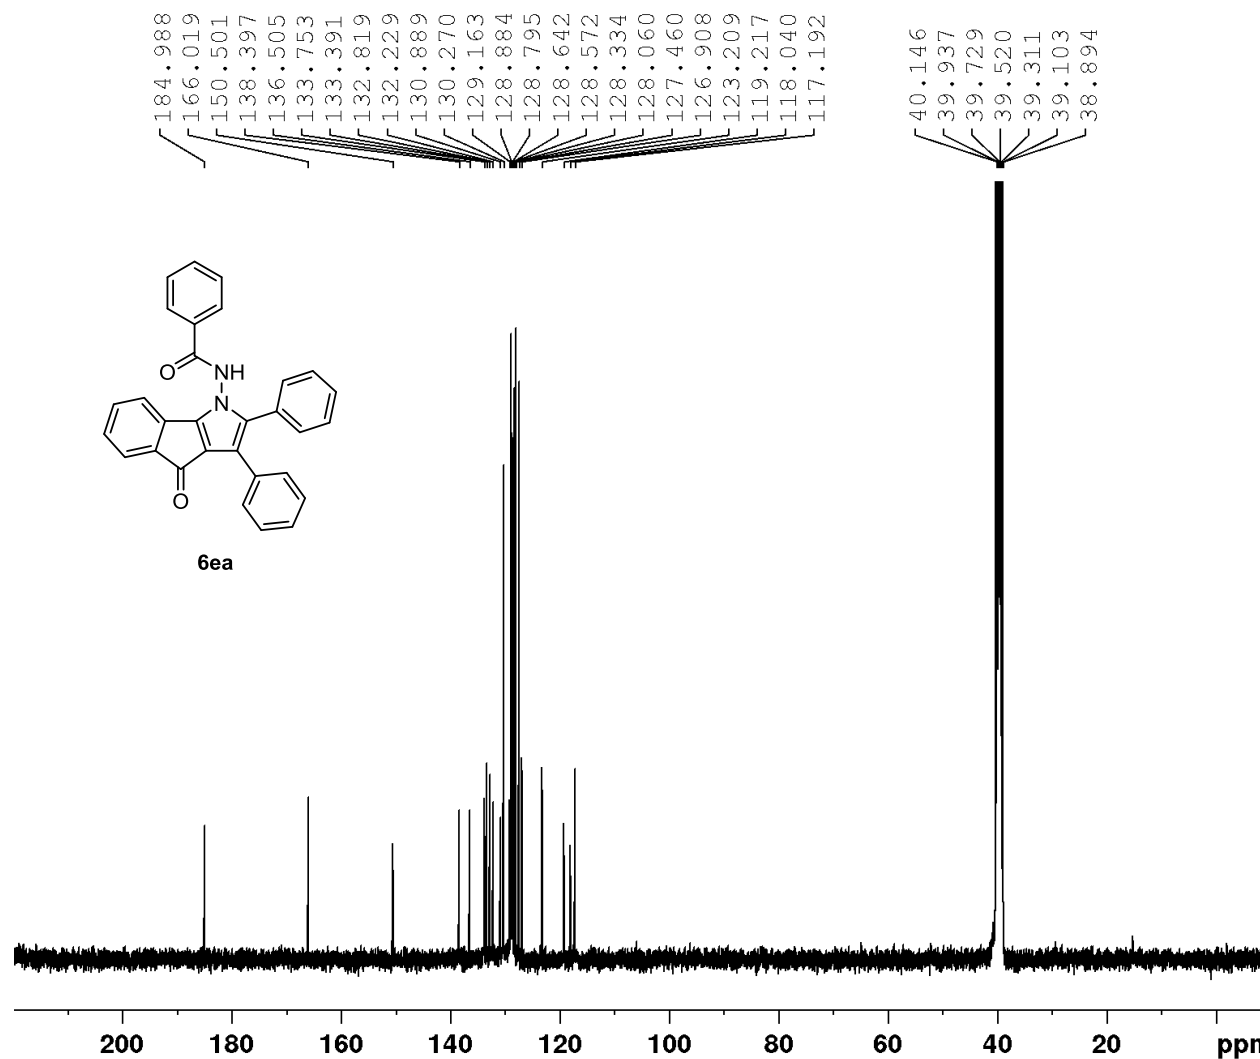

Current Data Parameters  
 NAME SW Zi non sbu  
 EXPNO 2  
 PROCNO 1

F2 - Acquisition Parameters  
 Date\_ 20200302  
 Time 23.22  
 INSTRUM spect  
 PROBHD 5 mm BBO BB-1H  
 PULPROG zgpg30  
 TD 32768  
 SOLVENT DMSO  
 NS 12000  
 DS 0  
 SWH 24038.461 Hz  
 FIDRES 0.733596 Hz  
 AQ 0.6815744 sec  
 RG 8192  
 DW 20.800 usec  
 DE 6.50 usec  
 TE 299.9 K  
 D1 2.00000000 sec  
 D11 0.03000000 sec  
 TD0 1

==== CHANNEL f1 =====  
 NUC1 13C  
 P1 10.00 usec  
 PL1 3.80 dB  
 SFO1 100.6233325 MHz

==== CHANNEL f2 =====  
 CPDPRG[2] waltz16  
 NUC2 1H  
 PCPD2 90.00 usec  
 PL2 10.20 dB  
 PL12 26.00 dB  
 PL13 29.00 dB  
 SFO2 400.1316005 MHz

F2 - Processing parameters  
 SI 32768  
 SF 100.6128208 MHz  
 WDW EM  
 SSB 0  
 LB 1.00 Hz  
 GB 0  
 PC 1.00

<sup>1</sup>H NMR Spectrum of **6fa** (DMSO-d<sub>6</sub>, 400 MHz)

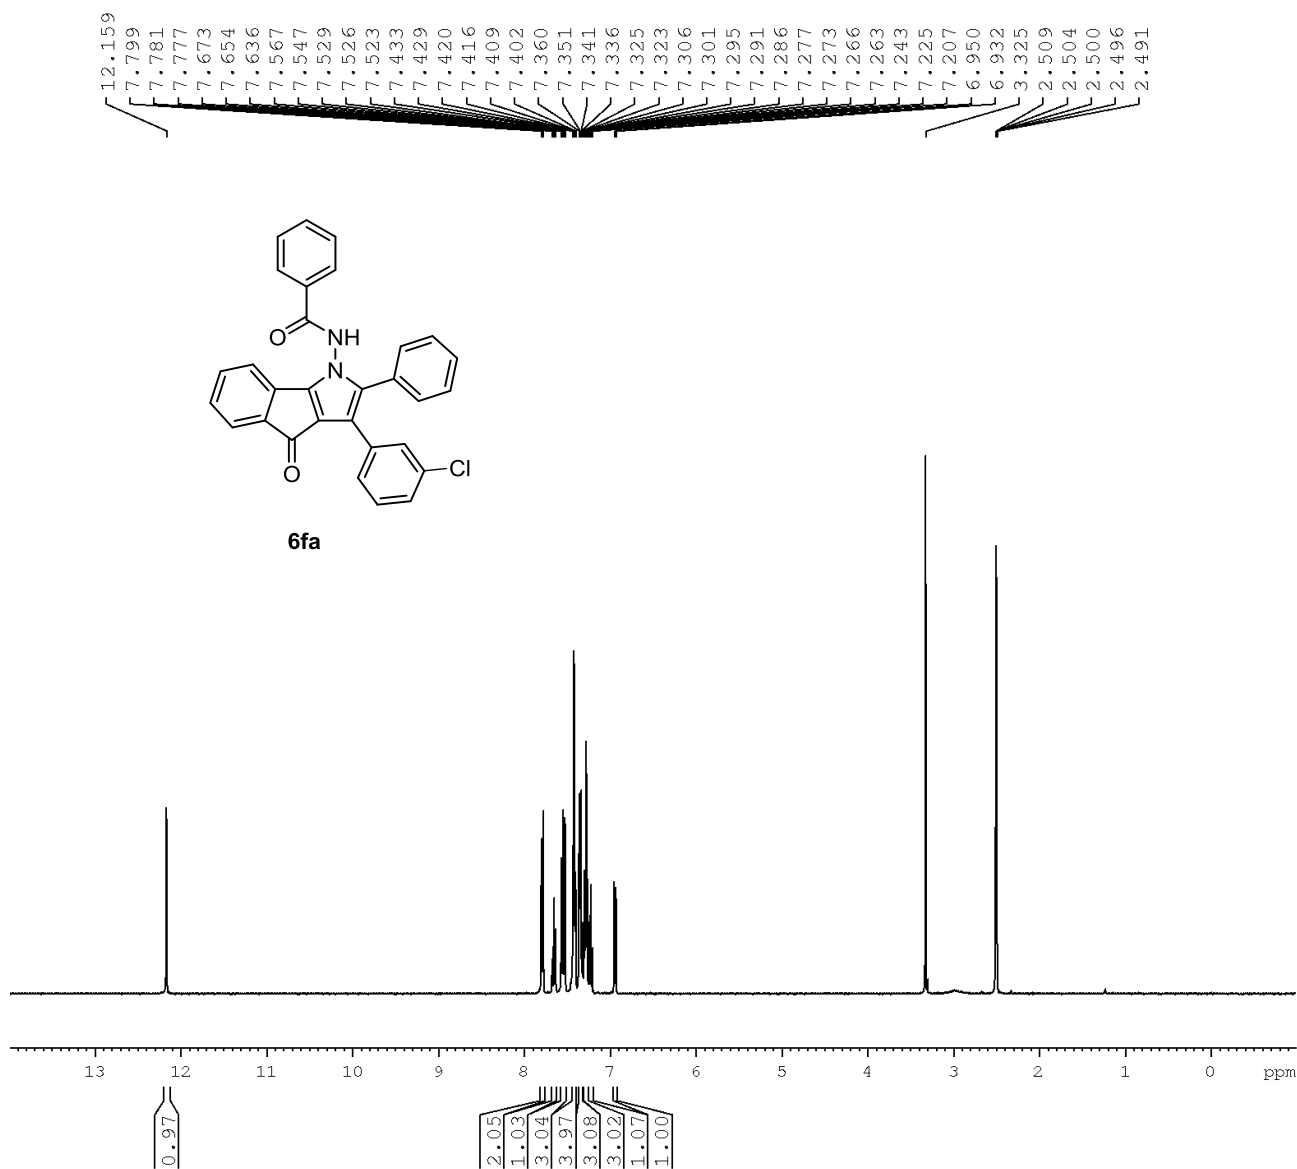

Current Data Parameters  
NAME SW Zi 3-C1  
EXPNO 1  
PROCNO 1

F2 - Acquisition Parameters  
Date\_ 20200608  
Time 23.13  
INSTRUM spect  
PROBHD 5 mm BBO BB-1H  
PULPROG zg30  
TD 32768  
SOLVENT DMSO  
NS 32  
DS 0  
SWH 7246.377 Hz  
FIDRES 0.221142 Hz  
AQ 2.2609921 sec  
RG 362  
DW 69.000 usec  
DE 6.50 usec  
TE 296.3 K  
D1 2.00000000 sec  
TDO 1

==== CHANNEL f1 =====  
NUC1 1H  
P1 15.00 usec  
PL1 11.10 dB  
SFO1 400.1324008 MHz

F2 - Processing parameters  
SI 16384  
SF 400.1300058 MHz  
WDW EM  
SSB 0  
LB 0 Hz  
GB 0  
PC 1.00

<sup>13</sup>C NMR Spectrum of **6fa** (DMSO-d<sub>6</sub>, 100 MHz)

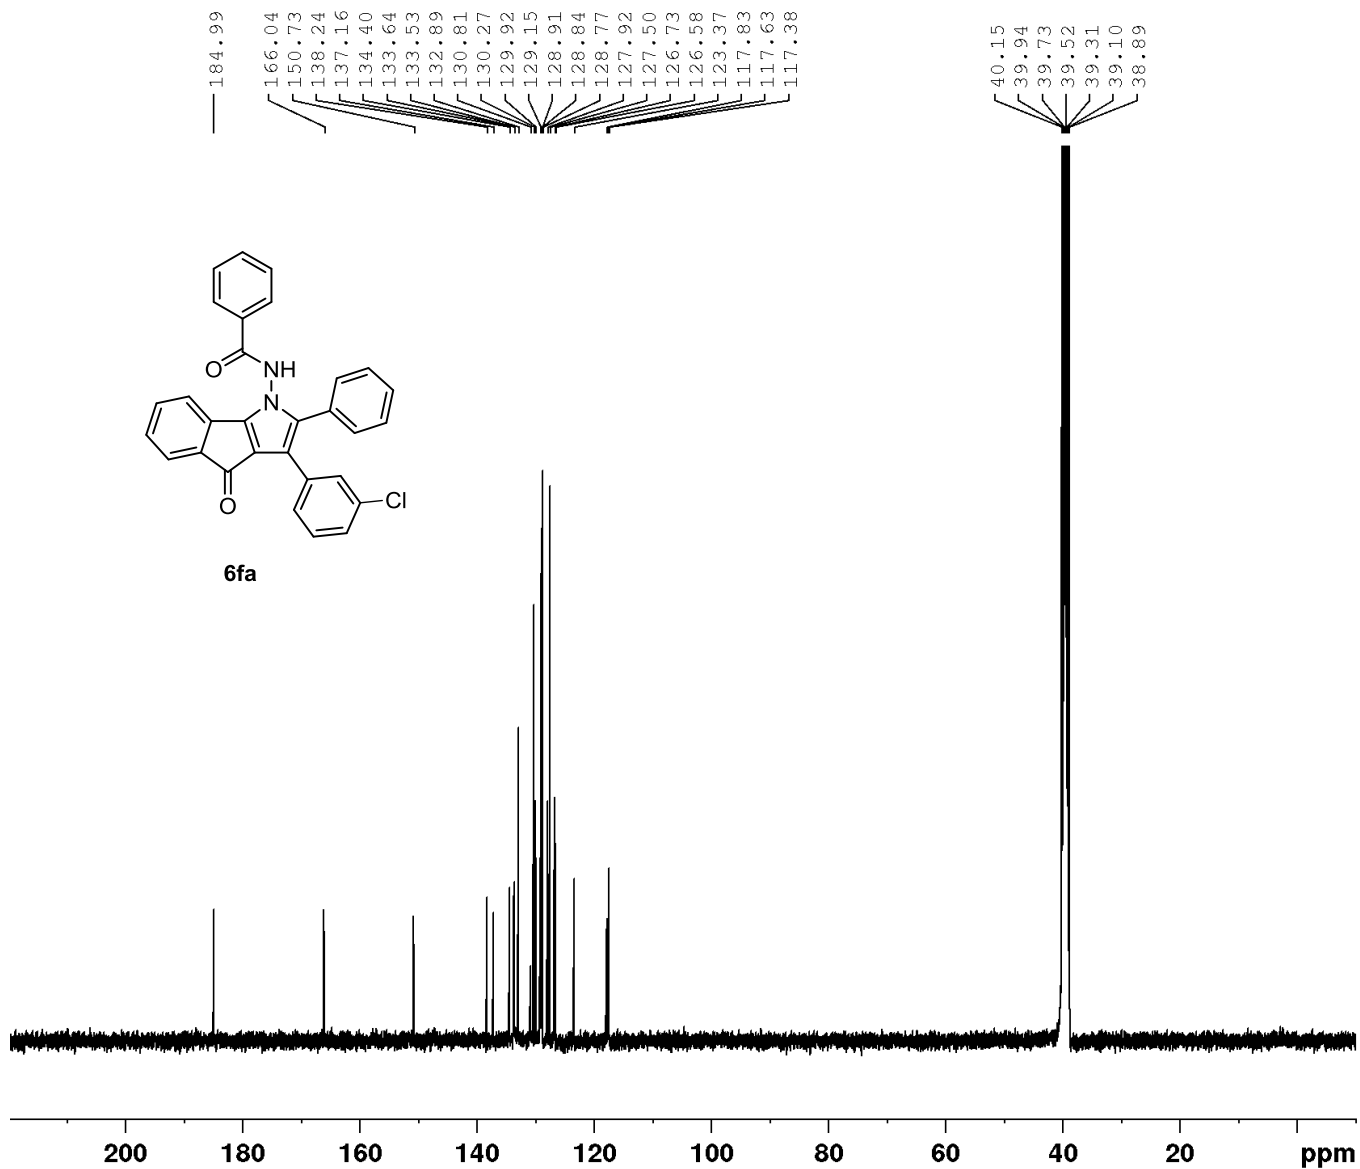

Current Data Parameters  
NAME SW Zi 3-C1  
EXPNO 2  
PROCNO 1

F2 - Acquisition Parameters  
Date\_ 20200608  
Time 23.16  
INSTRUM spect  
PROBHD 5 mm BBO BB-1H  
PULPROG zgpg30  
TD 32768  
SOLVENT DMSO  
NS 22301  
DS 0  
SWH 24038.461 Hz  
FIDRES 0.733596 Hz  
AQ 0.6815744 sec  
RG 8192  
DW 20.800 usec  
DE 6.50 usec  
TE 296.1 K  
D1 2.00000000 sec  
D11 0.03000000 sec  
TD0 1

=====  
CHANNEL f1  
NUC1 13C  
P1 10.00 usec  
PL1 3.80 dB  
SFO1 100.6233325 MHz

=====  
CHANNEL f2  
CPDPRG[2] waltz16  
NUC2 1H  
PCPD2 90.00 usec  
PL2 10.20 dB  
PL12 26.00 dB  
PL13 29.00 dB  
SFO2 400.1316005 MHz

F2 - Processing parameters  
SI 32768  
SF 100.6128196 MHz  
WDW EM  
SSB 0  
LB 1.00 Hz  
GB 0  
PC 1.00

<sup>1</sup>H NMR Spectrum of 6ia (CDCl<sub>3</sub>, 400 MHz)

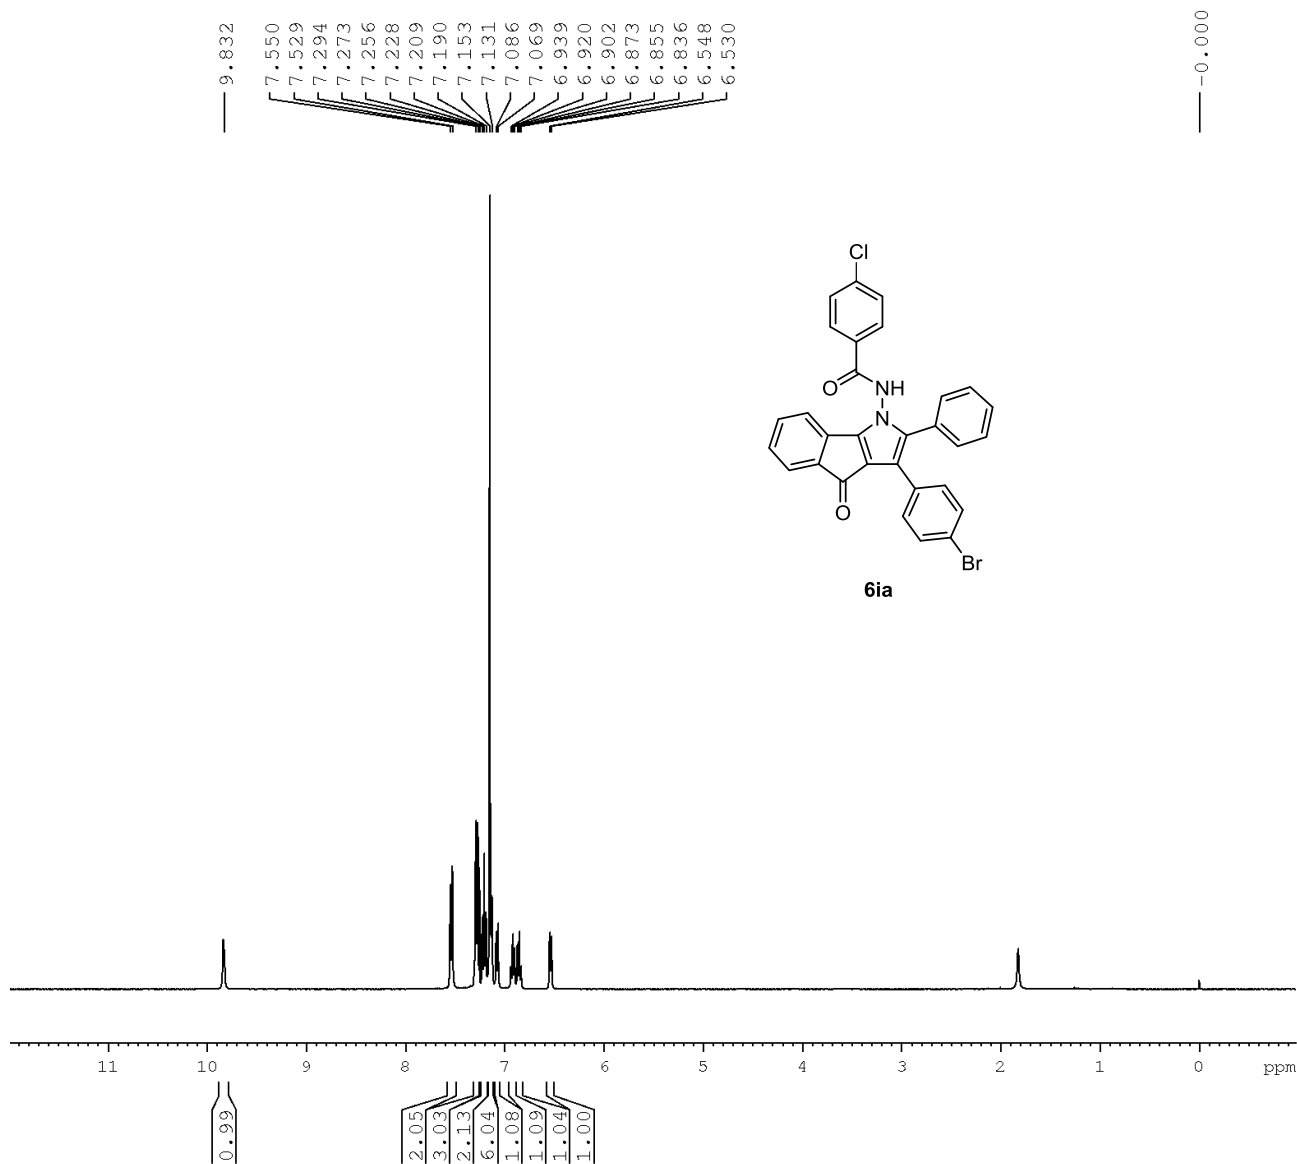

Current Data Parameters  
NAME SW-hy C1  
EXPNO 3  
PROCNO 1

F2 - Acquisition Parameters  
Date\_ 20200424  
Time 22.18  
INSTRUM spect  
PROBHD 5 mm PABBO BB/  
PULPROG zg30  
TD 32768  
SOLVENT CDCl3  
NS 32  
DS 0  
SWH 7211.539 Hz  
FIDRES 0.220079 Hz  
AQ 2.2719147 sec  
RG 89.08  
DW 69.333 usec  
DE 10.06 usec  
TE 298.2 K  
D1 2.00000000 sec  
TDO 1

==== CHANNEL f1 =====  
SF01 400.1324008 MHz  
NUC1 1H  
P1 15.00 usec  
PLW1 11.39999962 W

F2 - Processing parameters  
SI 16384  
SF 400.1300110 MHz  
WDW EM  
SSB 0  
LB 0 Hz  
GB 0  
PC 1.00

<sup>13</sup>C NMR Spectrum of **6ia** (CDCl<sub>3</sub>, 100 MHz)

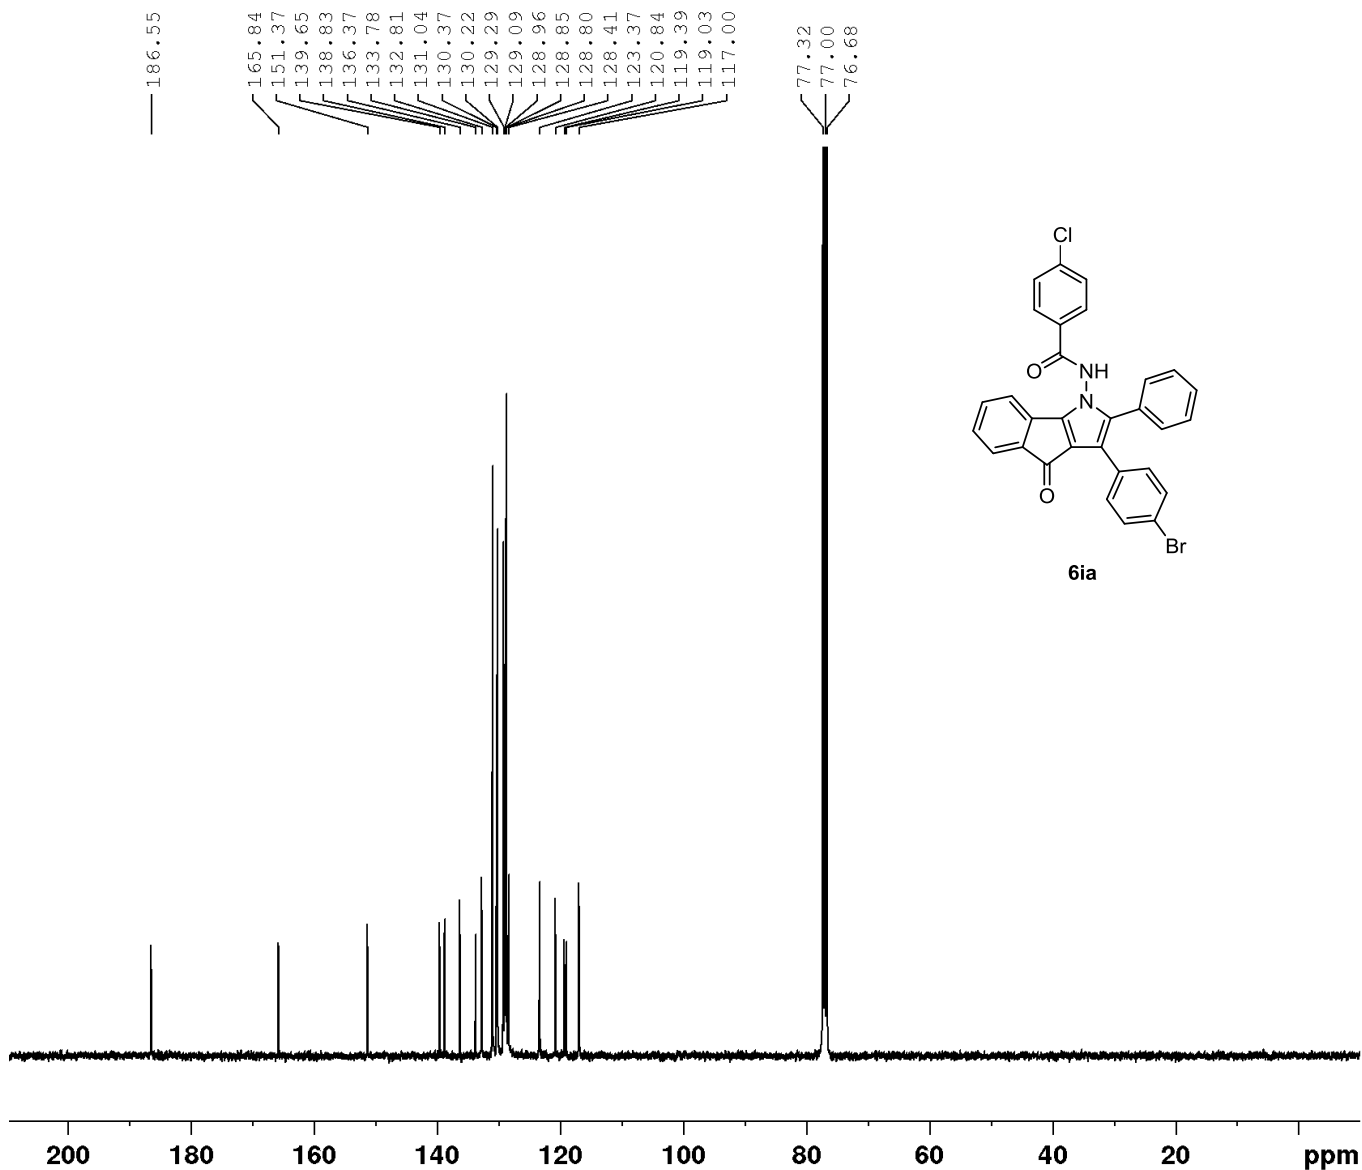

Current Data Parameters  
NAME SW-hy C1  
EXPNO 4  
PROCNO 1

F2 - Acquisition Parameters  
Date\_ 20200424  
Time 22.22  
INSTRUM spect  
PROBHD 5 mm PABBO BB/  
PULPROG zgpg30  
TD 32768  
SOLVENT CDCl3  
NS 2759  
DS 0  
SWH 24038.461 Hz  
FIDRES 0.733596 Hz  
AQ 0.6815744 sec  
RG 198.09  
DW 20.800 usec  
DE 6.50 usec  
TE 299.0 K  
D1 2.00000000 sec  
D11 0.03000000 sec  
TD0 1

===== CHANNEL f1 =====  
SFO1 100.6228298 MHz  
NUC1 13C  
P1 10.00 usec  
PLW1 49.50000000 W

===== CHANNEL f2 =====  
SFO2 400.1316005 MHz  
NUC2 1H  
CPDPRG[2] waltz16  
PCPD2 90.00 usec  
PLW2 12.50000000 W  
PLW12 0.34722000 W  
PLW13 0.28125000 W

F2 - Processing parameters  
SI 32768  
SF 100.6127727 MHz  
WDW EM  
SSB 0  
LB 2.00 Hz  
GB 0  
PC 1.00



<sup>1</sup>H NMR Spectrum of 6ja (CDCl<sub>3</sub>, 400 MHz)

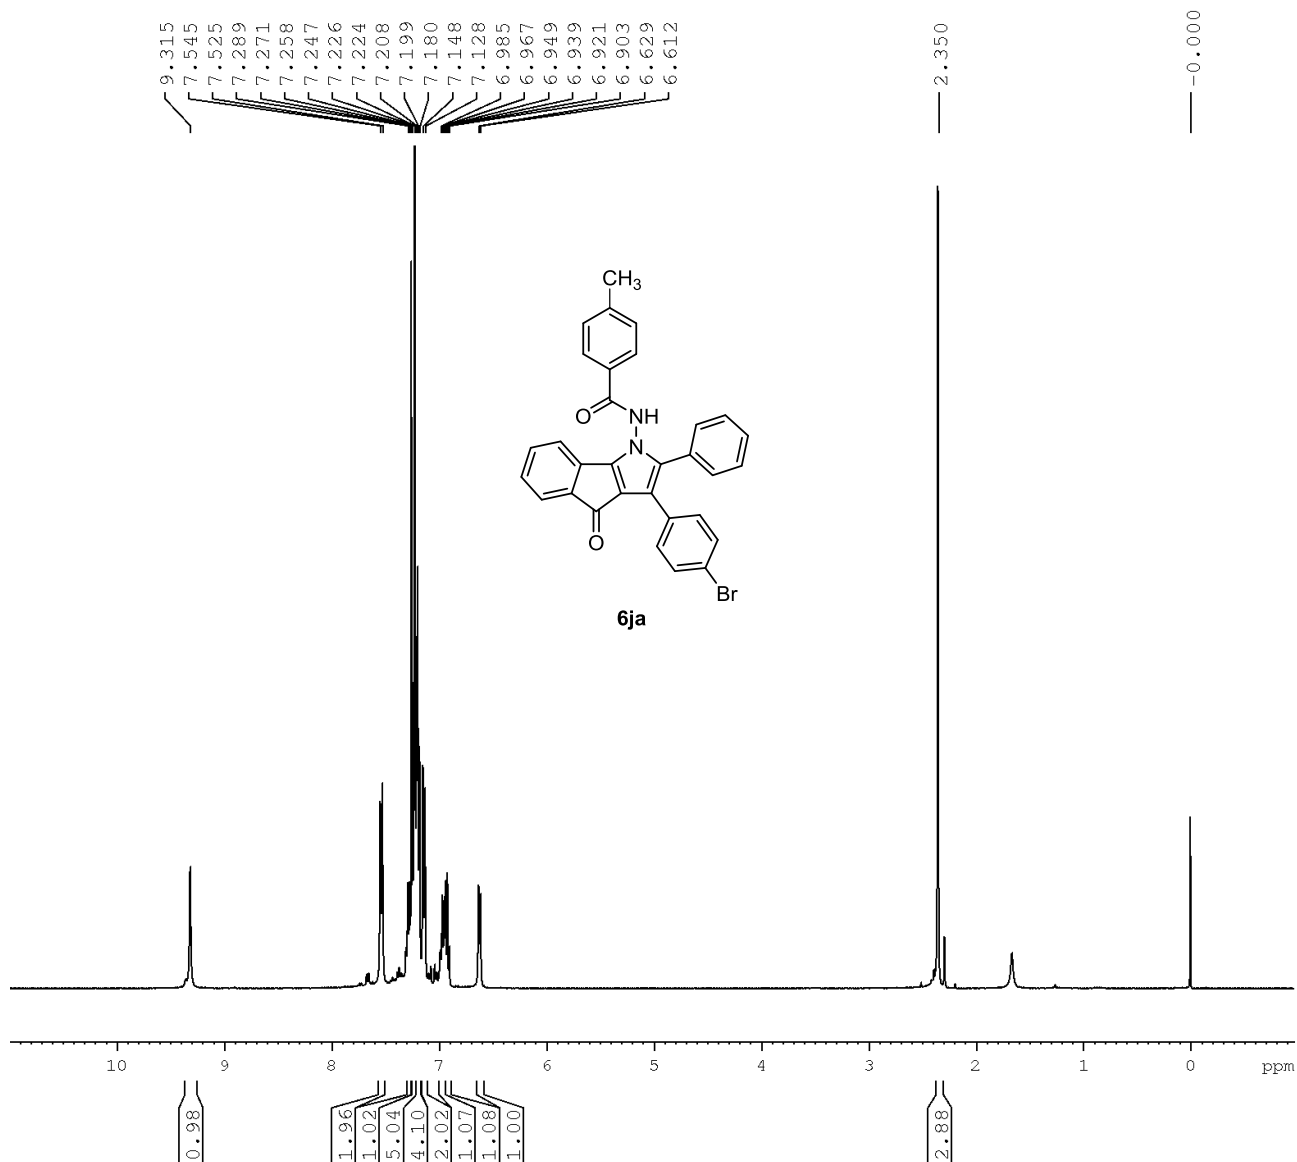

Current Data Parameters  
NAME SW-hy Me-1  
EXPNO 2  
PROCNO 1

F2 - Acquisition Parameters  
Date\_ 20200520  
Time 15.00  
INSTRUM spect  
PROBHD 5 mm PABBO BB/  
PULPROG zg30  
TD 32768  
SOLVENT CDCl3  
NS 32  
DS 0  
SWH 7211.539 Hz  
FIDRES 0.220079 Hz  
AQ 2.2719147 sec  
RG 113.31  
DW 69.333 usec  
DE 10.06 usec  
TE 296.3 K  
D1 2.00000000 sec  
TDO 1

==== CHANNEL f1 =====  
SFO1 400.1324008 MHz  
NUC1 1H  
P1 15.00 usec  
PLW1 11.39999962 W

F2 - Processing parameters  
SI 16384  
SF 400.1300106 MHz  
WDW EM  
SSB 0  
LB 0 Hz  
GB 0  
PC 1.00

<sup>13</sup>C NMR Spectrum of **6ja** (CDCl<sub>3</sub>, 100 MHz)

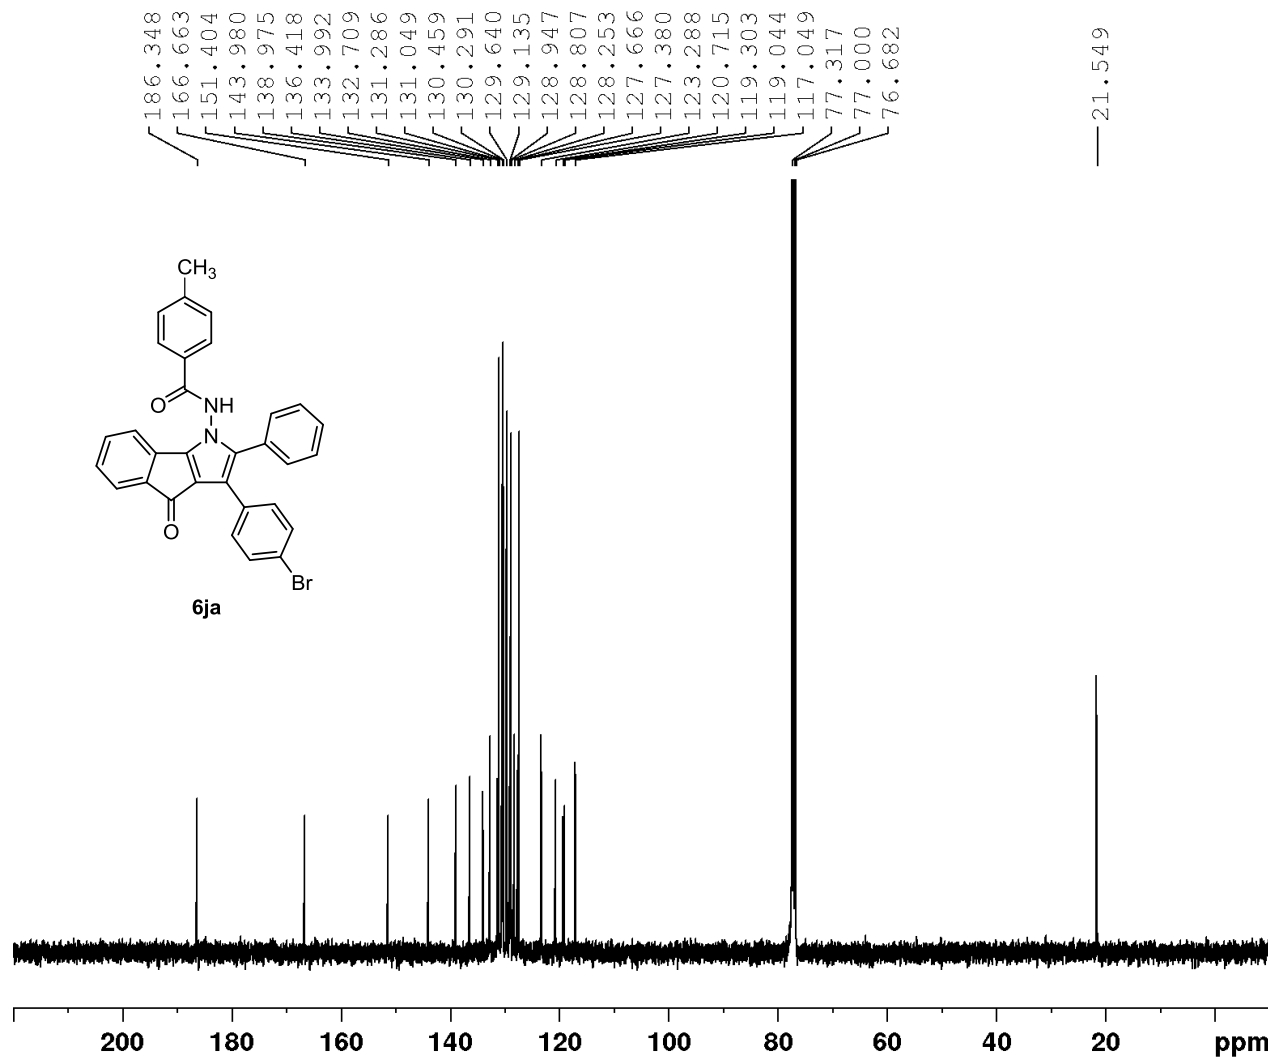

Current Data Parameters  
NAME SW-hyCH3  
EXPNO 2  
PROCNO 1

F2 - Acquisition Parameters  
Date\_ 20200321  
Time 2.05  
INSTRUM spect  
PROBHD 5 mm BBO BB-1H  
PULPROG zgpg30  
TD 32768  
SOLVENT CDCl3  
NS 2660  
DS 0  
SWH 24038.461 Hz  
FIDRES 0.733596 Hz  
AQ 0.6815744 sec  
RG 8192  
DW 20.800 usec  
DE 6.50 usec  
TE 296.5 K  
D1 2.00000000 sec  
D11 0.03000000 sec  
TD0 1

==== CHANNEL f1 =====  
NUC1 13C  
P1 10.00 usec  
PL1 3.80 dB  
SFO1 100.6233325 MHz

==== CHANNEL f2 =====  
CPDPRG[2] waltz16  
NUC2 1H  
PCPD2 90.00 usec  
PL2 10.20 dB  
PL12 26.00 dB  
PL13 29.00 dB  
SFO2 400.1316005 MHz

F2 - Processing parameters  
SI 32768  
SF 100.6127721 MHz  
WDW EM  
SSB 0  
LB 1.00 Hz  
GB 0  
PC 1.00

<sup>1</sup>H NMR Spectrum of **6ab** (DMSO-d<sub>6</sub>, 400 MHz)

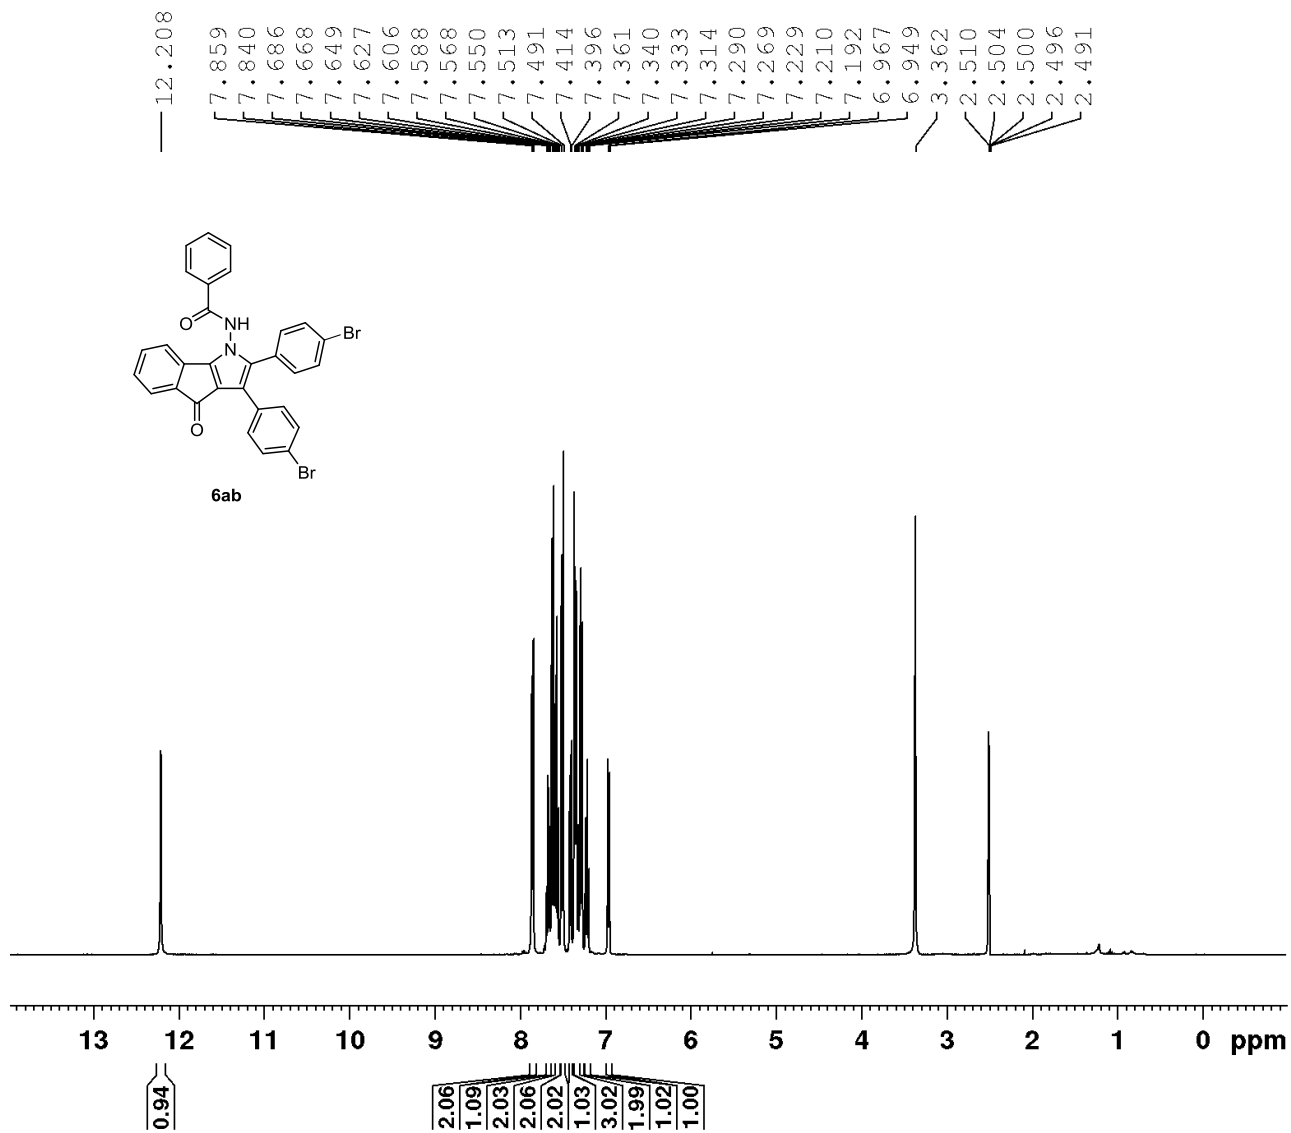

Current Data Parameters  
 NAME SW bc 4-Br  
 EXPNO 3  
 PROCNO 1

F2 - Acquisition Parameters  
 Date\_ 20200304  
 Time 23.25  
 INSTRUM spect  
 PROBHD 5 mm BBO BB-1H  
 PULPROG zg30  
 TD 32768  
 SOLVENT DMSO  
 NS 32  
 DS 0  
 SWH 7246.377 Hz  
 FIDRES 0.221142 Hz  
 AQ 2.2609921 sec  
 RG 114  
 DW 69.000 usec  
 DE 6.50 usec  
 TE 298.8 K  
 D1 2.00000000 sec  
 TDO 1

==== CHANNEL f1 =====  
 NUC1 1H  
 P1 15.00 usec  
 PL1 11.10 dB  
 SFO1 400.1324008 MHz

F2 - Processing parameters  
 SI 16384  
 SF 400.1300028 MHz  
 WDW EM  
 SSB 0  
 LB 0 Hz  
 GB 0  
 PC 1.00

<sup>13</sup>C NMR Spectrum of **6ab** (DMSO-d<sub>6</sub>, 100 MHz)

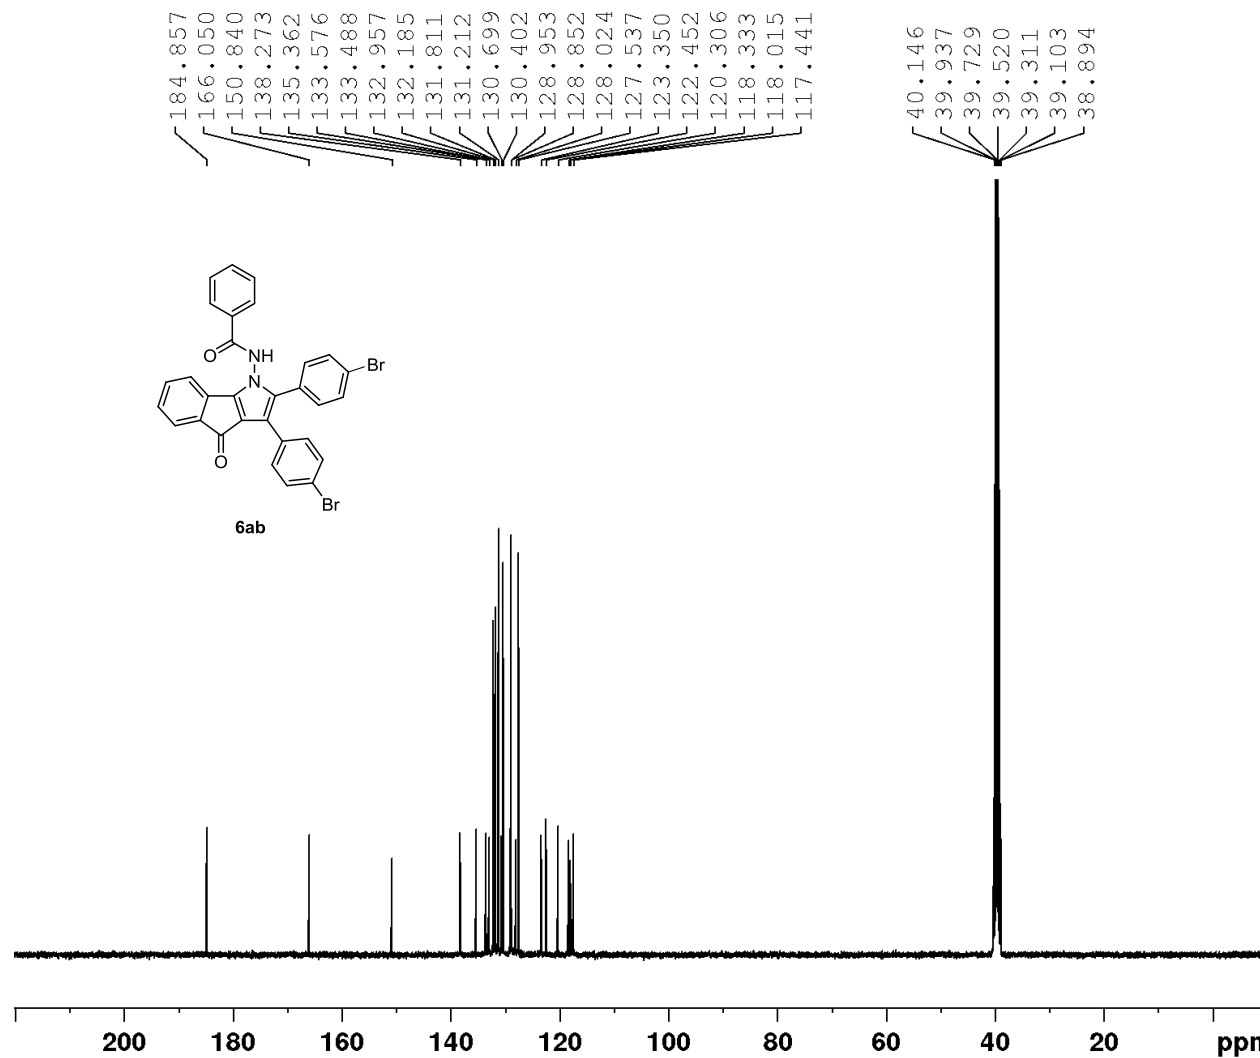

Current Data Parameters  
NAME SW bc 4-Br  
EXPNO 4  
PROCNO 1

F2 - Acquisition Parameters  
Date\_ 20200304  
Time 23.28  
INSTRUM spect  
PROBHD 5 mm BBO BB-1H  
PULPROG zgpg30  
TD 32768  
SOLVENT DMSO  
NS 1963  
DS 0  
SWH 24038.461 Hz  
FIDRES 0.733596 Hz  
AQ 0.6815744 sec  
RG 4096  
DW 20.800 usec  
DE 6.50 usec  
TE 298.8 K  
D1 2.00000000 sec  
D11 0.03000000 sec  
TD0 1

==== CHANNEL f1 =====  
NUC1 13C  
P1 10.00 usec  
PL1 3.80 dB  
SFO1 100.6233325 MHz

==== CHANNEL f2 =====  
CPDPRG[2] waltz16  
NUC2 1H  
PCPD2 90.00 usec  
PL2 10.20 dB  
PL12 26.00 dB  
PL13 29.00 dB  
SFO2 400.1316005 MHz

F2 - Processing parameters  
SI 32768  
SF 100.6128210 MHz  
WDW EM  
SSB 0  
LB 1.00 Hz  
GB 0  
PC 1.00

<sup>1</sup>H NMR Spectrum of **6ac** (DMSO-d<sub>6</sub>, 400 MHz)

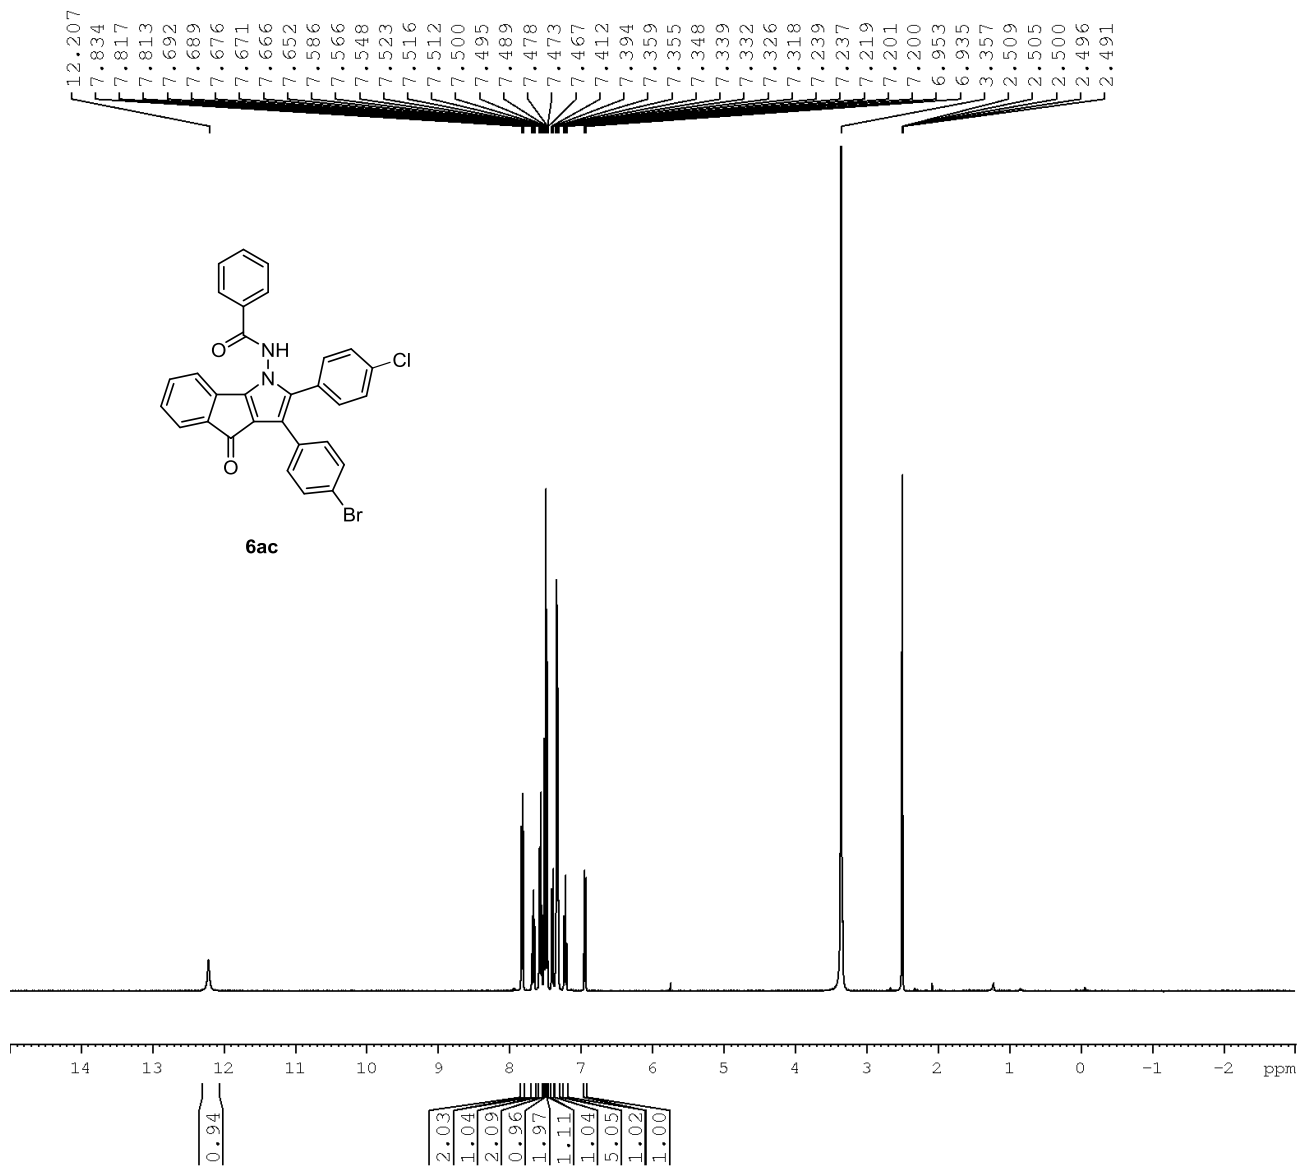

Current Data Parameters  
 NAME bc 4-Cl  
 EXPNO 1  
 PROCNO 1

F2 - Acquisition Parameters  
 Date\_ 20200321  
 Time 22.15  
 INSTRUM spect  
 PROBHD 5 mm PABBO BB/  
 PULPROG zg30  
 TD 32768  
 SOLVENT DMSO  
 NS 16  
 DS 0  
 SWH 7211.539 Hz  
 FIDRES 0.220079 Hz  
 AQ 2.2719147 sec  
 RG 89.08  
 DW 69.333 usec  
 DE 10.06 usec  
 TE 297.9 K  
 D1 2.0000000 sec  
 TDO 1

==== CHANNEL f1 =====  
 SFO1 400.1324008 MHz  
 NUC1 1H  
 P1 15.00 usec  
 PLW1 11.39999962 W

F2 - Processing parameters  
 SI 16384  
 SF 400.1300031 MHz  
 WDW EM  
 SSB 0  
 LB 0 Hz  
 GB 0  
 PC 1.00

<sup>13</sup>C NMR Spectrum of **6ac** (DMSO-d<sub>6</sub>, 100 MHz)

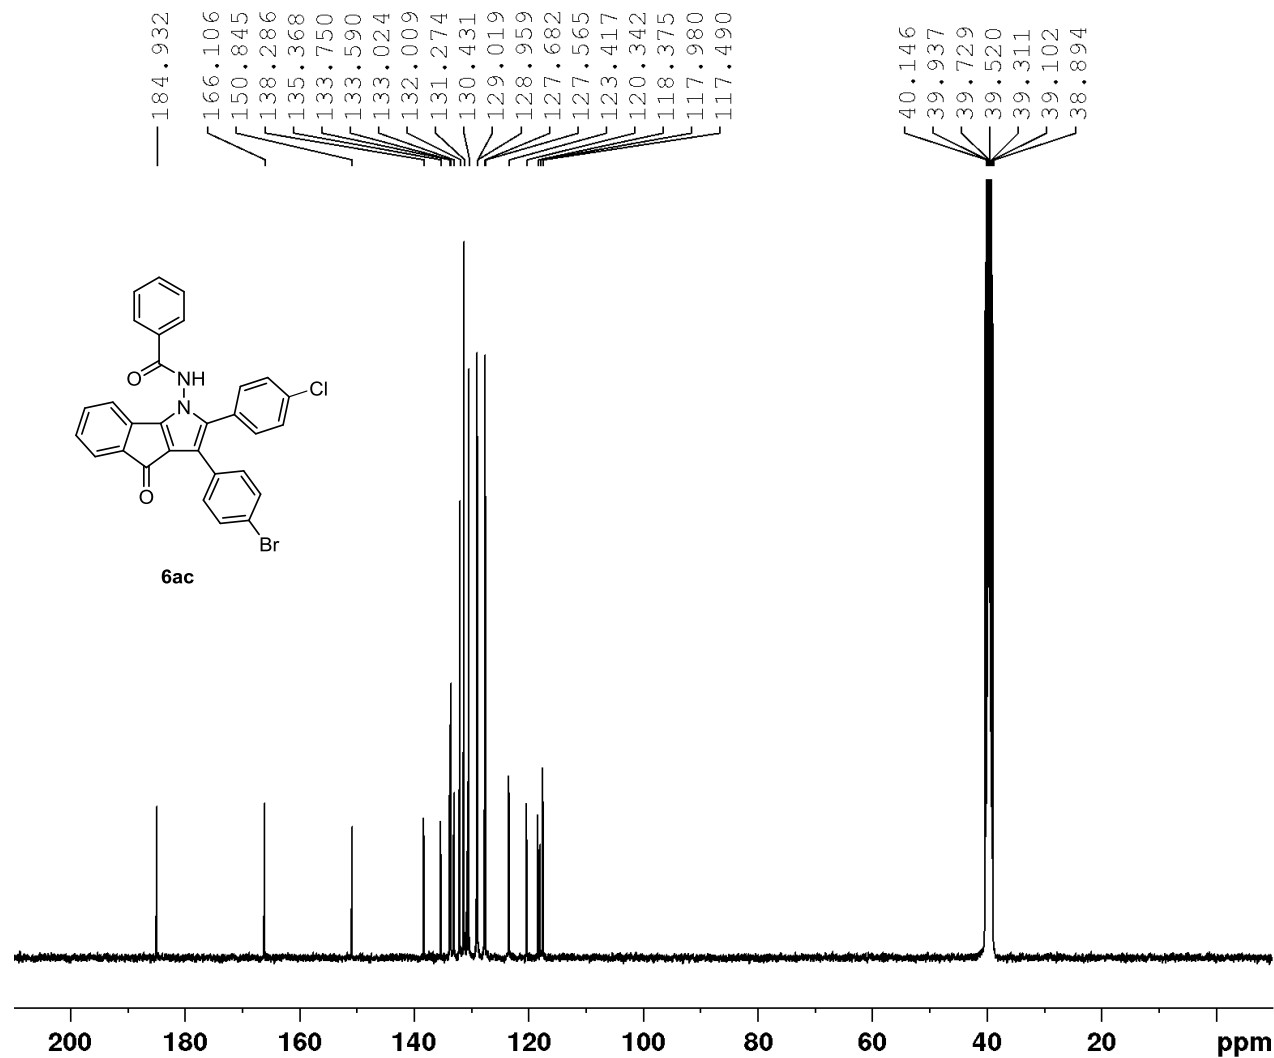

Current Data Parameters  
NAME bc 4-Cl  
EXPNO 2  
PROCNO 1

F2 - Acquisition Parameters  
Date\_ 20200321  
Time 22.25  
INSTRUM spect  
PROBHD 5 mm PABBO BB/  
PULPROG zgpg30  
TD 32768  
SOLVENT DMSO  
NS 13451  
DS 0  
SWH 24038.461 Hz  
FIDRES 0.733596 Hz  
AQ 0.6815744 sec  
RG 198.09  
DW 20.800 usec  
DE 6.50 usec  
TE 298.7 K  
D1 2.00000000 sec  
D11 0.03000000 sec  
TD0 1

==== CHANNEL f1 =====  
SFO1 100.6228298 MHz  
NUC1 13C  
P1 10.00 usec  
PLW1 49.50000000 W

==== CHANNEL f2 =====  
SFO2 400.1316005 MHz  
NUC2 1H  
CPDPRG[2] waltz16  
PCPD2 90.00 usec  
PLW2 12.50000000 W  
PLW12 0.34722000 W  
PLW13 0.28125000 W

F2 - Processing parameters  
SI 32768  
SF 100.6128155 MHz  
WDW EM  
SSB 0  
LB 2.00 Hz  
GB 0  
PC 1.00

<sup>1</sup>H NMR Spectrum of 6ad (CDCl<sub>3</sub>, 400 MHz)

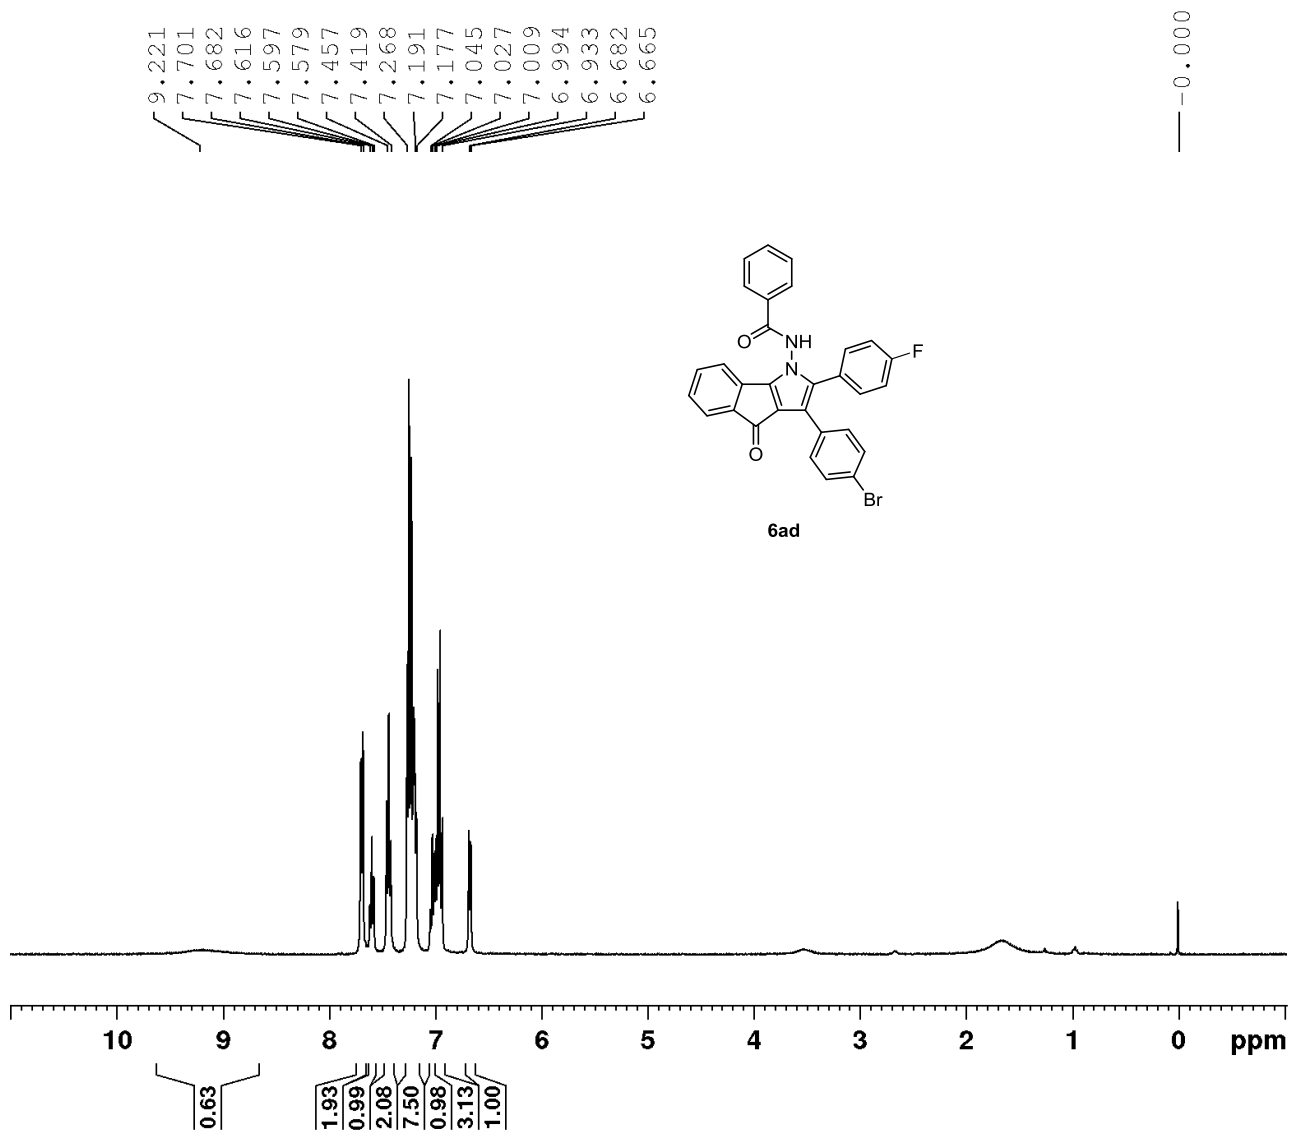

Current Data Parameters  
NAME SW Bc 4-F  
EXPNO 1  
PROCNO 1

F2 - Acquisition Parameters  
Date\_ 20200329  
Time 0.42  
INSTRUM spect  
PROBHD 5 mm BBO BB-1H  
PULPROG zg30  
TD 32768  
SOLVENT CDCl3  
NS 32  
DS 0  
SWH 7246.377 Hz  
FIDRES 0.221142 Hz  
AQ 2.2609921 sec  
RG 256  
DW 69.000 usec  
DE 6.50 usec  
TE 296.9 K  
D1 2.00000000 sec  
TDO 1

==== CHANNEL f1 =====  
NUC1 1H  
P1 15.00 usec  
PL1 11.10 dB  
SFO1 400.1324008 MHz

F2 - Processing parameters  
SI 16384  
SF 400.1300092 MHz  
WDW EM  
SSB 0  
LB 0 Hz  
GB 0  
PC 1.00

<sup>13</sup>C NMR Spectrum of **6ad** (CDCl<sub>3</sub>, 100 MHz)

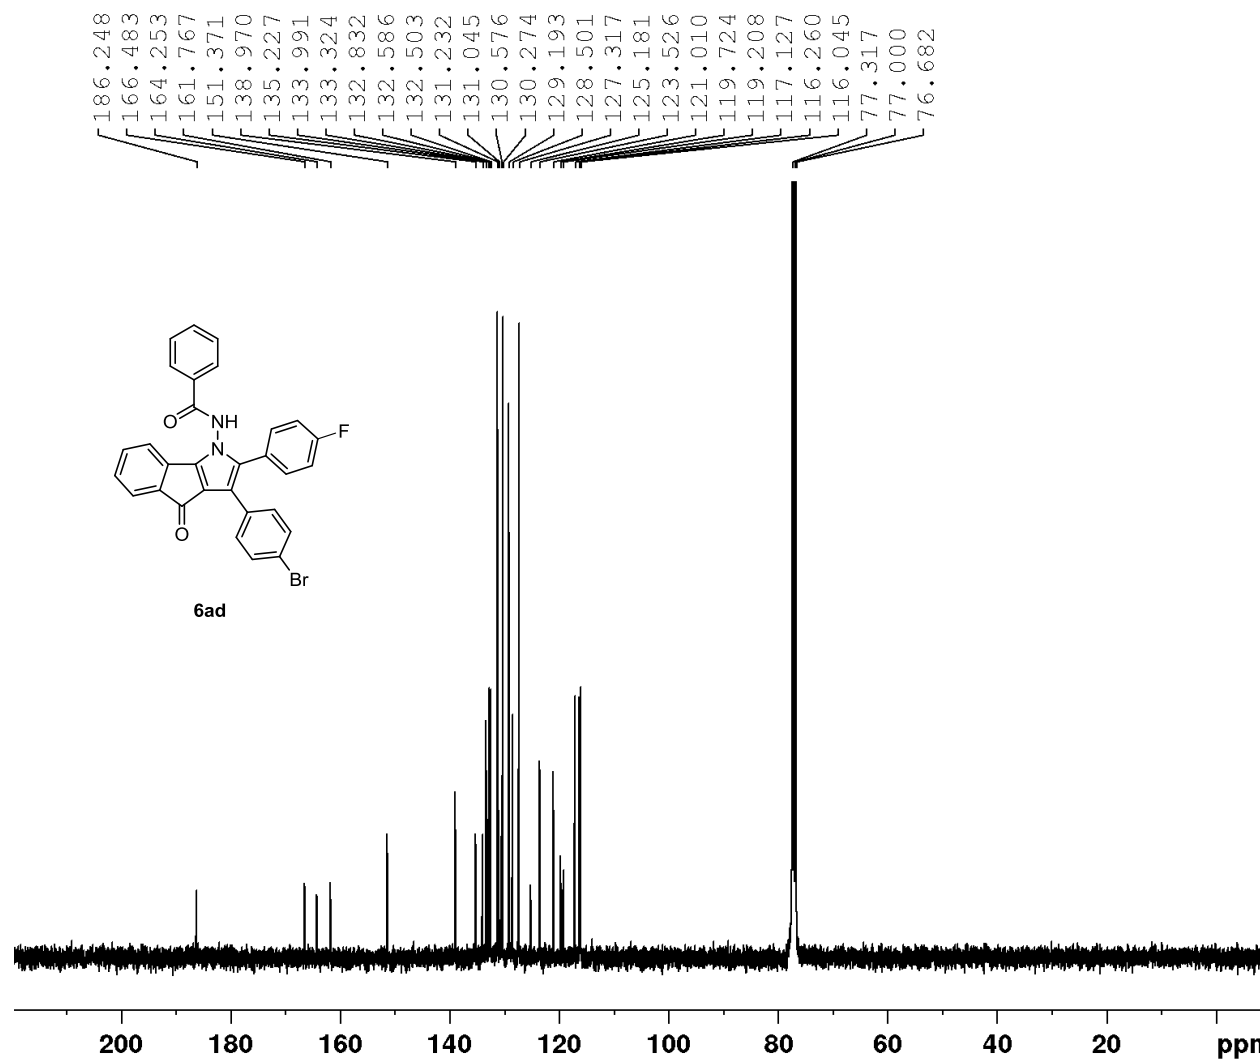

Current Data Parameters  
NAME SW Bc 4-F  
EXPNO 2  
PROCNO 1

F2 - Acquisition Parameters  
Date\_ 20200329  
Time 0.45  
INSTRUM spect  
PROBHD 5 mm BBO BB-1H  
PULPROG zgpg30  
TD 32768  
SOLVENT CDCl3  
NS 15000  
DS 0  
SWH 24038.461 Hz  
FIDRES 0.733596 Hz  
AQ 0.6815744 sec  
RG 9195.2  
DW 20.800 usec  
DE 6.50 usec  
TE 296.8 K  
D1 2.00000000 sec  
D11 0.03000000 sec  
TD0 1

===== CHANNEL f1 =====  
NUC1 13C  
P1 10.00 usec  
PL1 3.80 dB  
SFO1 100.6233325 MHz

===== CHANNEL f2 =====  
CPDPRG[2] waltz16  
NUC2 1H  
PCPD2 90.00 usec  
PL2 10.20 dB  
PL12 26.00 dB  
PL13 29.00 dB  
SFO2 400.1316005 MHz

F2 - Processing parameters  
SI 32768  
SF 100.6127693 MHz  
WDW EM  
SSB 0  
LB 1.00 Hz  
GB 0  
PC 1.00



<sup>19</sup>F NMR Spectrum of **6ad** (CDCl<sub>3</sub>, 376 MHz)

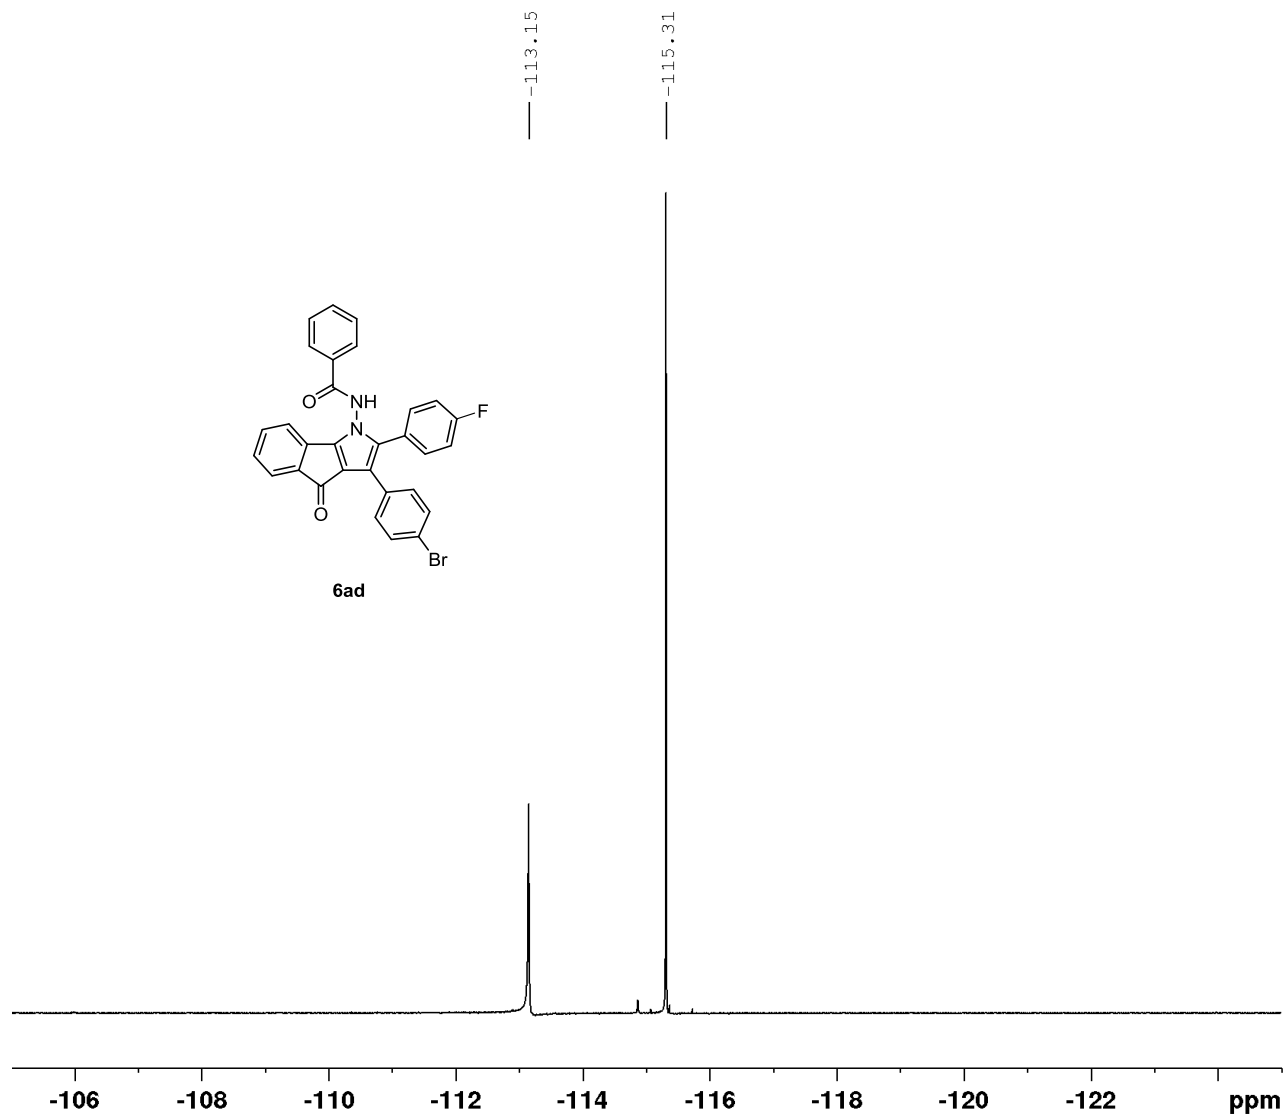

Current Data Parameters  
NAME SW Bc 4F - 1  
EXPNO 1  
PROCNO 1

F2 - Acquisition Parameters  
Date\_ 20200612  
Time 20.23  
INSTRUM spect  
PROBHD 5 mm PABBO BB/  
PULPROG zgig  
TD 131072  
SOLVENT CDCl3  
NS 32  
DS 0  
SWH 89285.711 Hz  
FIDRES 0.681196 Hz  
AQ 0.7340032 sec  
RG 198.09  
DW 5.600 usec  
DE 6.50 usec  
TE 298.3 K  
D1 1.00000000 sec  
D11 0.03000000 sec  
TD0 1

===== CHANNEL f1 =====  
SFO1 376.4607168 MHz  
NUC1 19F  
P1 15.00 usec  
PLW1 18.00000000 W

===== CHANNEL f2 =====  
SFO2 400.1316005 MHz  
NUC2 1H  
CPDPRG[2] waltz16  
PCPD2 90.00 usec  
PLW2 12.50000000 W  
PLW12 0.34722000 W

F2 - Processing parameters  
SI 65536  
SF 376.4992047 MHz  
WDW EM  
SSB 0  
LB 1.00 Hz  
GB 0  
PC 1.00

<sup>1</sup>H NMR Spectrum of 6ae (CDCl<sub>3</sub>, 400 MHz)

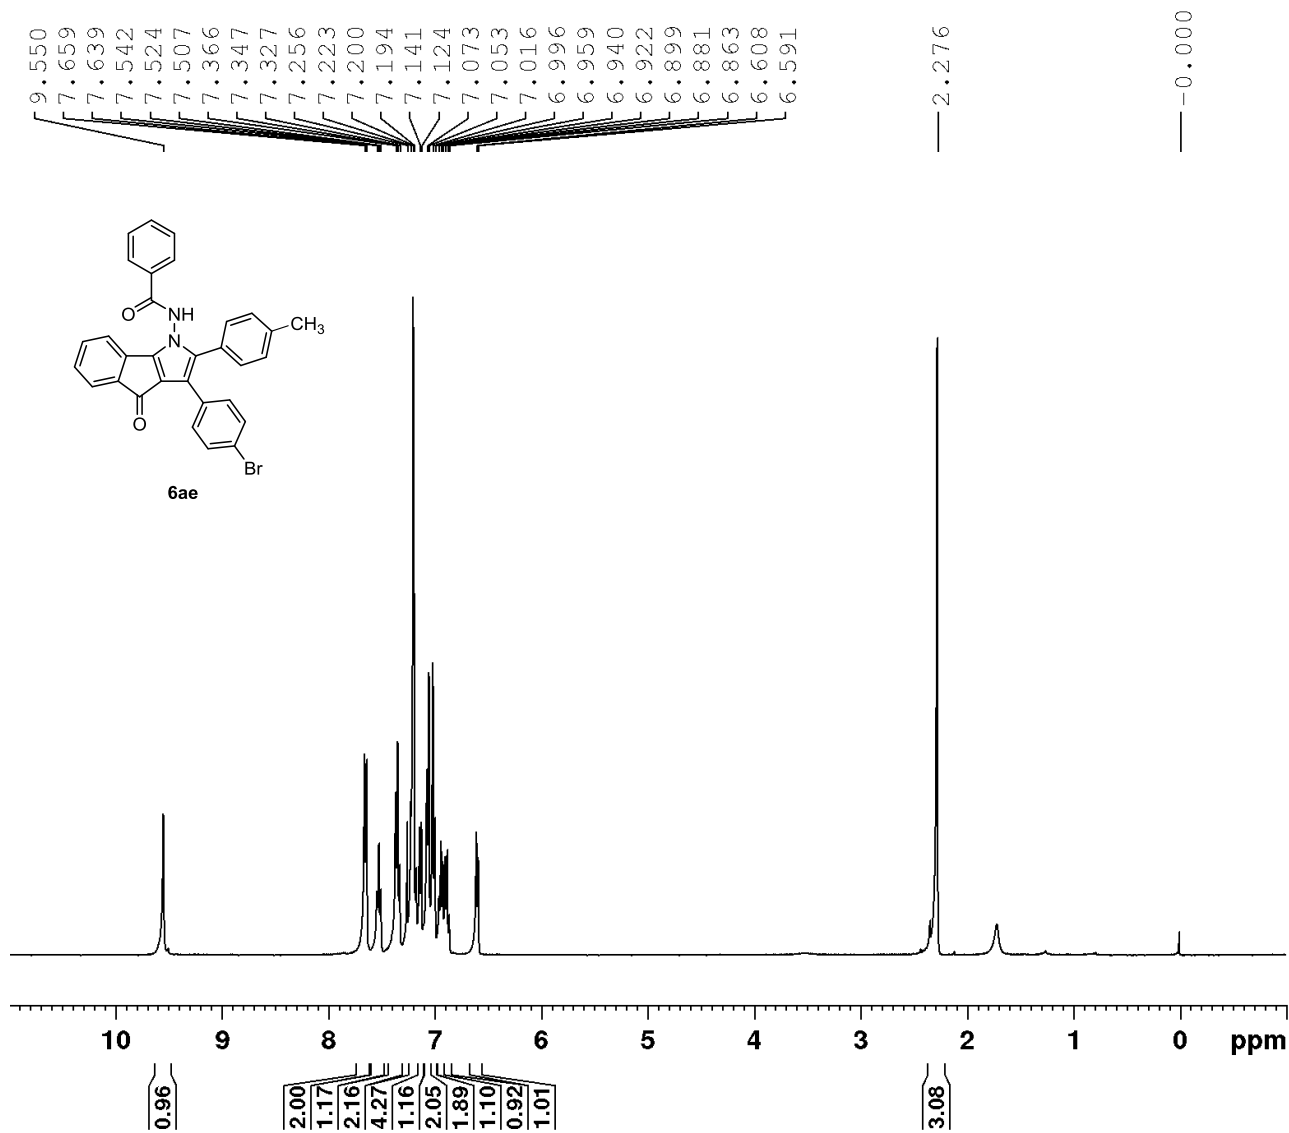

Current Data Parameters  
NAME SW Bc 4-Me  
EXPNO 1  
PROCNO 1

F2 - Acquisition Parameters  
Date\_ 20200326  
Time 0.43  
INSTRUM spect  
PROBHD 5 mm BBO BB-1H  
PULPROG zg30  
TD 32768  
SOLVENT CDCl3  
NS 32  
DS 0  
SWH 7246.377 Hz  
FIDRES 0.221142 Hz  
AQ 2.2609921 sec  
RG 161.3  
DW 69.000 usec  
DE 6.50 usec  
TE 296.2 K  
D1 2.00000000 sec  
TDO 1

==== CHANNEL f1 =====  
NUC1 1H  
P1 15.00 usec  
PL1 11.10 dB  
SFO1 400.1324008 MHz

F2 - Processing parameters  
SI 16384  
SF 400.1300102 MHz  
WDW EM  
SSB 0  
LB 0 Hz  
GB 0  
PC 1.00

<sup>13</sup>C NMR Spectrum of **6ae** (CDCl<sub>3</sub>, 100 MHz)

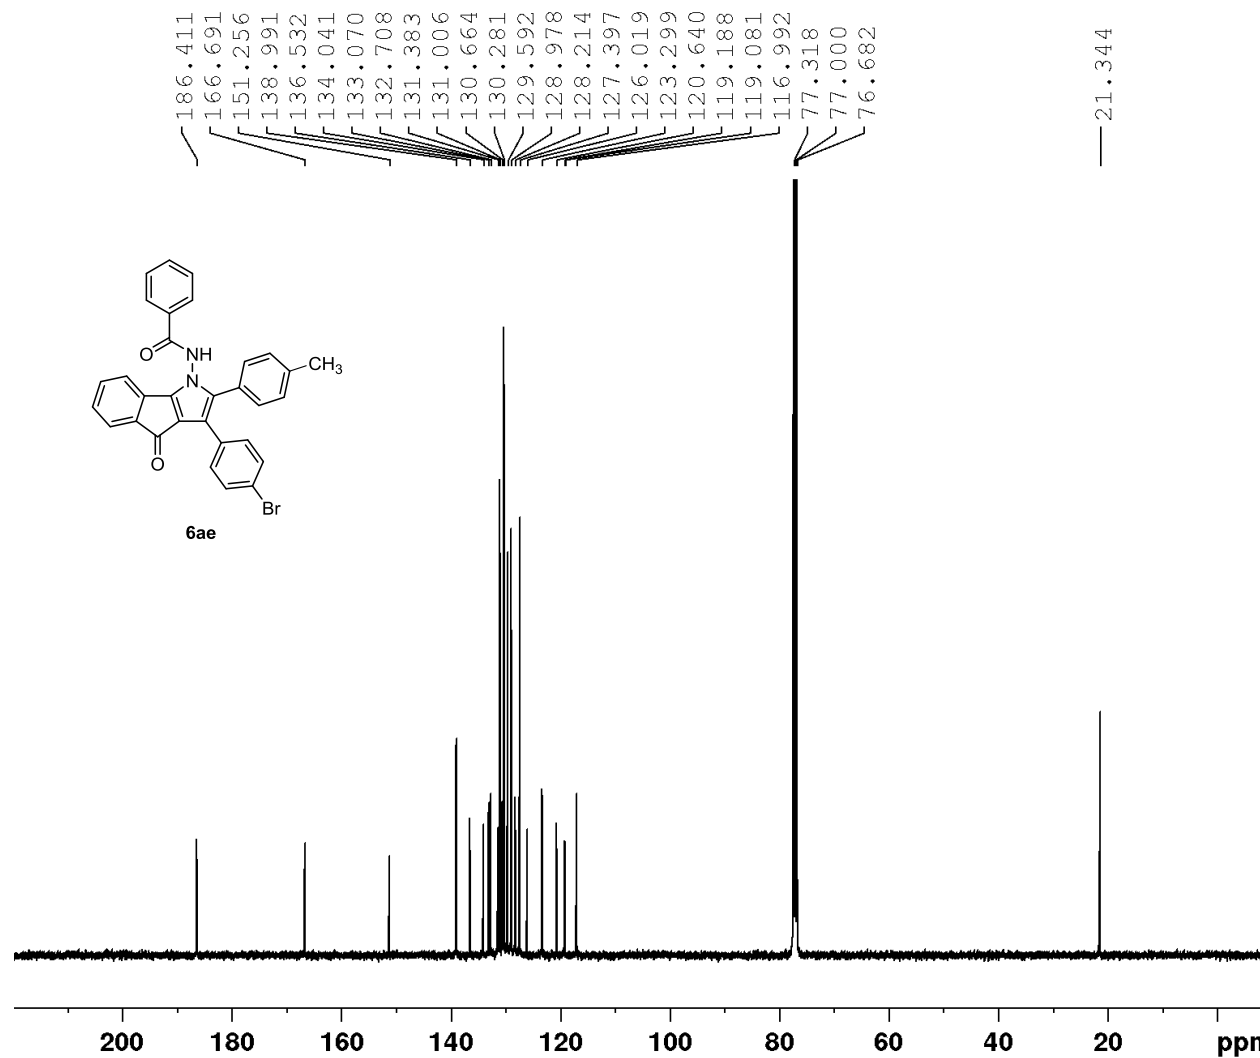

Current Data Parameters  
NAME SW Bc 4-Me  
EXPNO 2  
PROCNO 1

F2 - Acquisition Parameters  
Date\_ 20200326  
Time 0.48  
INSTRUM spect  
PROBHD 5 mm BBO BB-1H  
PULPROG zgpg30  
TD 32768  
SOLVENT CDCl3  
NS 11452  
DS 0  
SWH 24038.461 Hz  
FIDRES 0.733596 Hz  
AQ 0.6815744 sec  
RG 8192  
DW 20.800 usec  
DE 6.50 usec  
TE 296.0 K  
D1 2.00000000 sec  
D11 0.03000000 sec  
TD0 1

==== CHANNEL f1 =====  
NUC1 13C  
P1 10.00 usec  
PL1 3.80 dB  
SFO1 100.6233325 MHz

==== CHANNEL f2 =====  
CPDPRG[2] waltz16  
NUC2 1H  
PCPD2 90.00 usec  
PL2 10.20 dB  
PL12 26.00 dB  
PL13 29.00 dB  
SFO2 400.1316005 MHz

F2 - Processing parameters  
SI 32768  
SF 100.6127717 MHz  
WDW EM  
SSB 0  
LB 1.00 Hz  
GB 0  
PC 1.00

<sup>1</sup>H NMR Spectrum of 6af (CDCl<sub>3</sub>, 400 MHz)

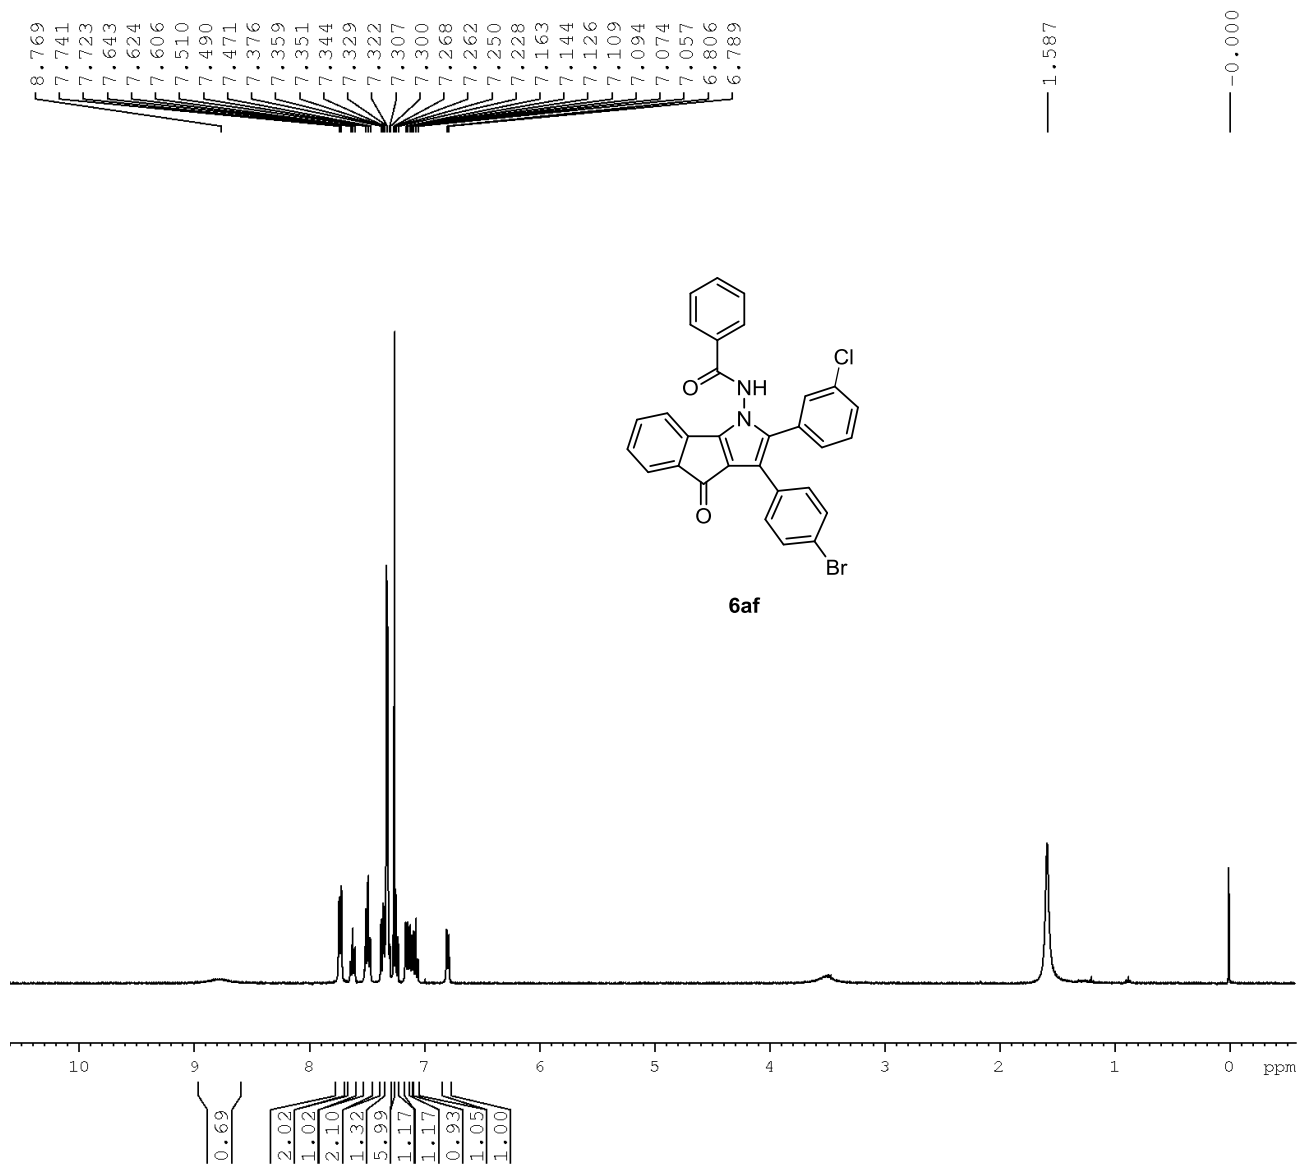

Current Data Parameters  
NAME 454  
EXPNO 4  
PROCNO 1

F2 - Acquisition Parameters  
Date\_ 20200425  
Time 11.52  
INSTRUM spect  
PROBHD 5 mm BBO BB-1H  
PULPROG zg30  
TD 32768  
SOLVENT CDCl3  
NS 32  
DS 0  
SWH 7246.377 Hz  
FIDRES 0.221142 Hz  
AQ 2.2609921 sec  
RG 362  
DW 69.000 usec  
DE 6.50 usec  
TE 296.4 K  
D1 2.00000000 sec  
TDO 1

==== CHANNEL f1 =====  
NUC1 1H  
P1 15.00 usec  
PL1 11.10 dB  
SFO1 400.1324008 MHz

F2 - Processing parameters  
SI 16384  
SF 400.1300101 MHz  
WDW EM  
SSB 0  
LB 0 Hz  
GB 0  
PC 1.00

<sup>13</sup>C NMR Spectrum of **6af** (DMSO-d<sub>6</sub>, 100 MHz)

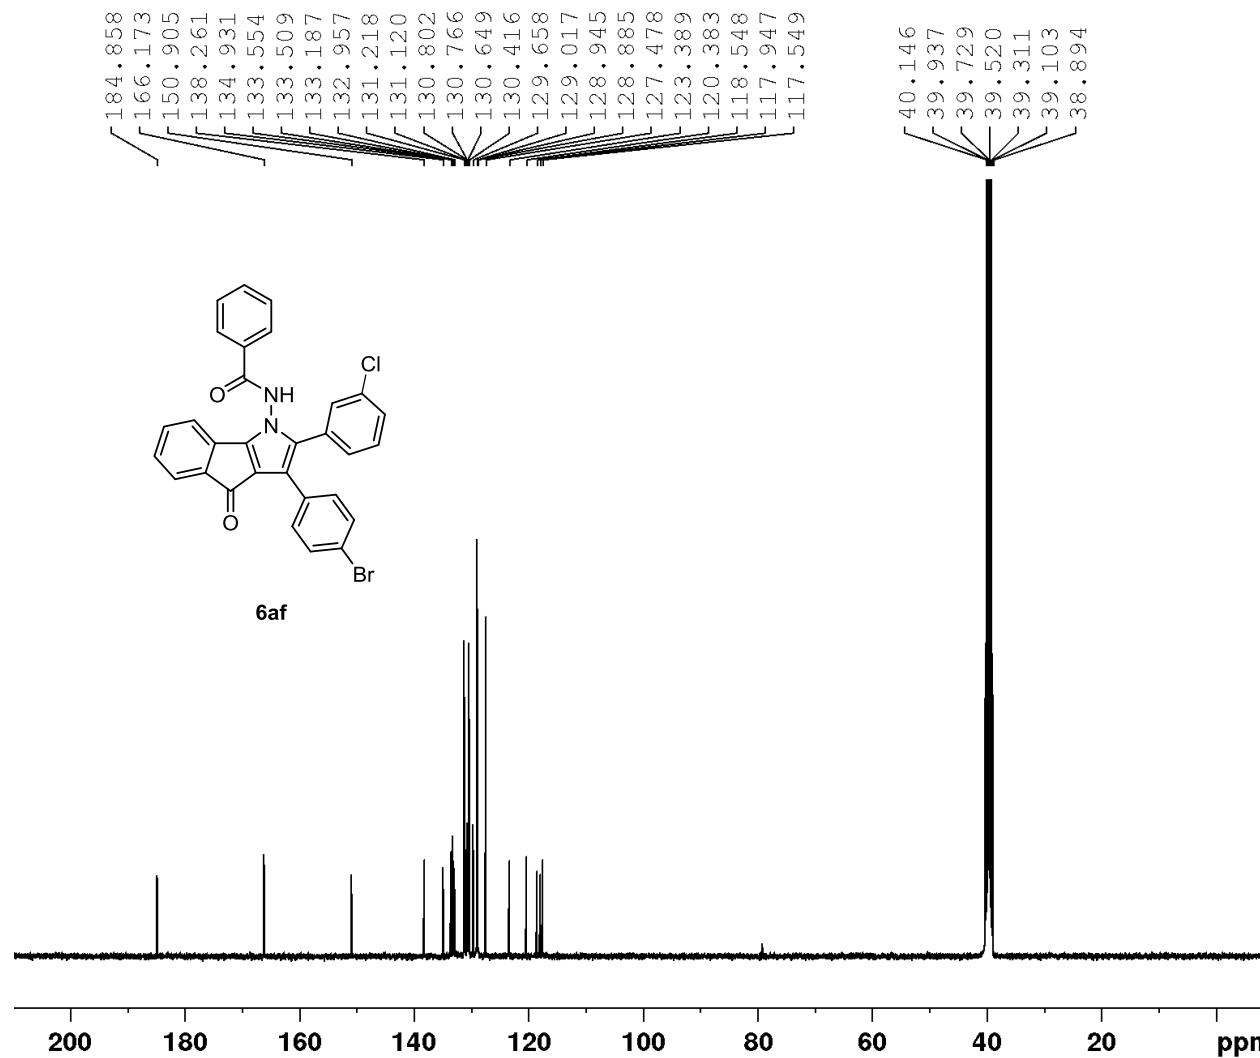

Current Data Parameters  
 NAME SW Bc 3-Cl  
 EXPNO 2  
 PROCNO 1

F2 - Acquisition Parameters  
 Date\_ 20200305  
 Time 1.08  
 INSTRUM spect  
 PROBHD 5 mm BBO BB-1H  
 PULPROG zgpg30  
 TD 32768  
 SOLVENT DMSO  
 NS 5000  
 DS 0  
 SWH 24038.461 Hz  
 FIDRES 0.733596 Hz  
 AQ 0.6815744 sec  
 RG 4096  
 DW 20.800 usec  
 DE 6.50 usec  
 TE 299.1 K  
 D1 2.00000000 sec  
 D11 0.03000000 sec  
 TD0 1

==== CHANNEL f1 =====  
 NUC1 13C  
 P1 10.00 usec  
 PL1 3.80 dB  
 SFO1 100.6233325 MHz

==== CHANNEL f2 =====  
 CPDPRG[2] waltz16  
 NUC2 1H  
 PCPD2 90.00 usec  
 PL2 10.20 dB  
 PL12 26.00 dB  
 PL13 29.00 dB  
 SFO2 400.1316005 MHz

F2 - Processing parameters  
 SI 32768  
 SF 100.6128200 MHz  
 WDW EM  
 SSB 0  
 LB 1.00 Hz  
 GB 0  
 PC 1.00

<sup>1</sup>H NMR Spectrum of **6ag** (DMSO-d<sub>6</sub>, 400 MHz)

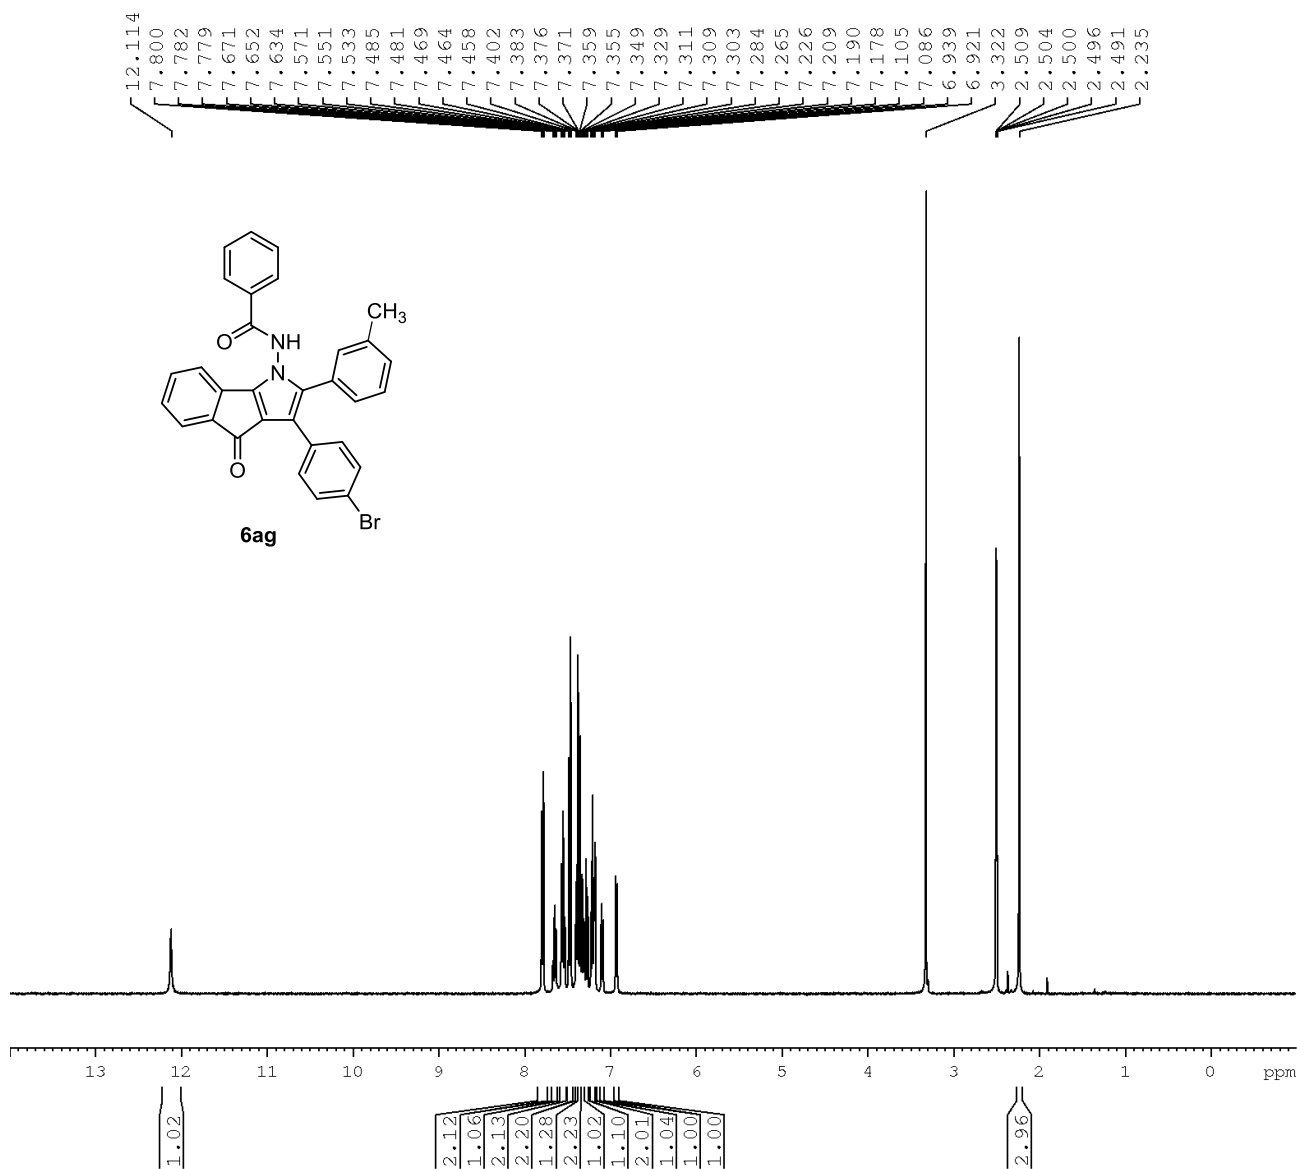

Current Data Parameters  
 NAME 18  
 EXPNO 1  
 PROCNO 1

F2 - Acquisition Parameters  
 Date\_ 20200426  
 Time 22.21  
 INSTRUM spect  
 PROBHD 5 mm PABBO BB/  
 PULPROG zg30  
 TD 32768  
 SOLVENT DMSO  
 NS 16  
 DS 0  
 SWH 7211.539 Hz  
 FIDRES 0.220079 Hz  
 AQ 2.2719147 sec  
 RG 198.09  
 DW 69.333 usec  
 DE 10.06 usec  
 TE 297.7 K  
 D1 2.00000000 sec  
 TDO 1

==== CHANNEL f1 =====  
 SF01 400.1324008 MHz  
 NUC1 1H  
 P1 15.00 usec  
 PLW1 11.39999962 W

F2 - Processing parameters  
 SI 16384  
 SF 400.1300031 MHz  
 WDW EM  
 SSB 0  
 LB 0 Hz  
 GB 0  
 PC 1.00

<sup>13</sup>C NMR Spectrum of **6ag** (DMSO-d<sub>6</sub>, 100 MHz)

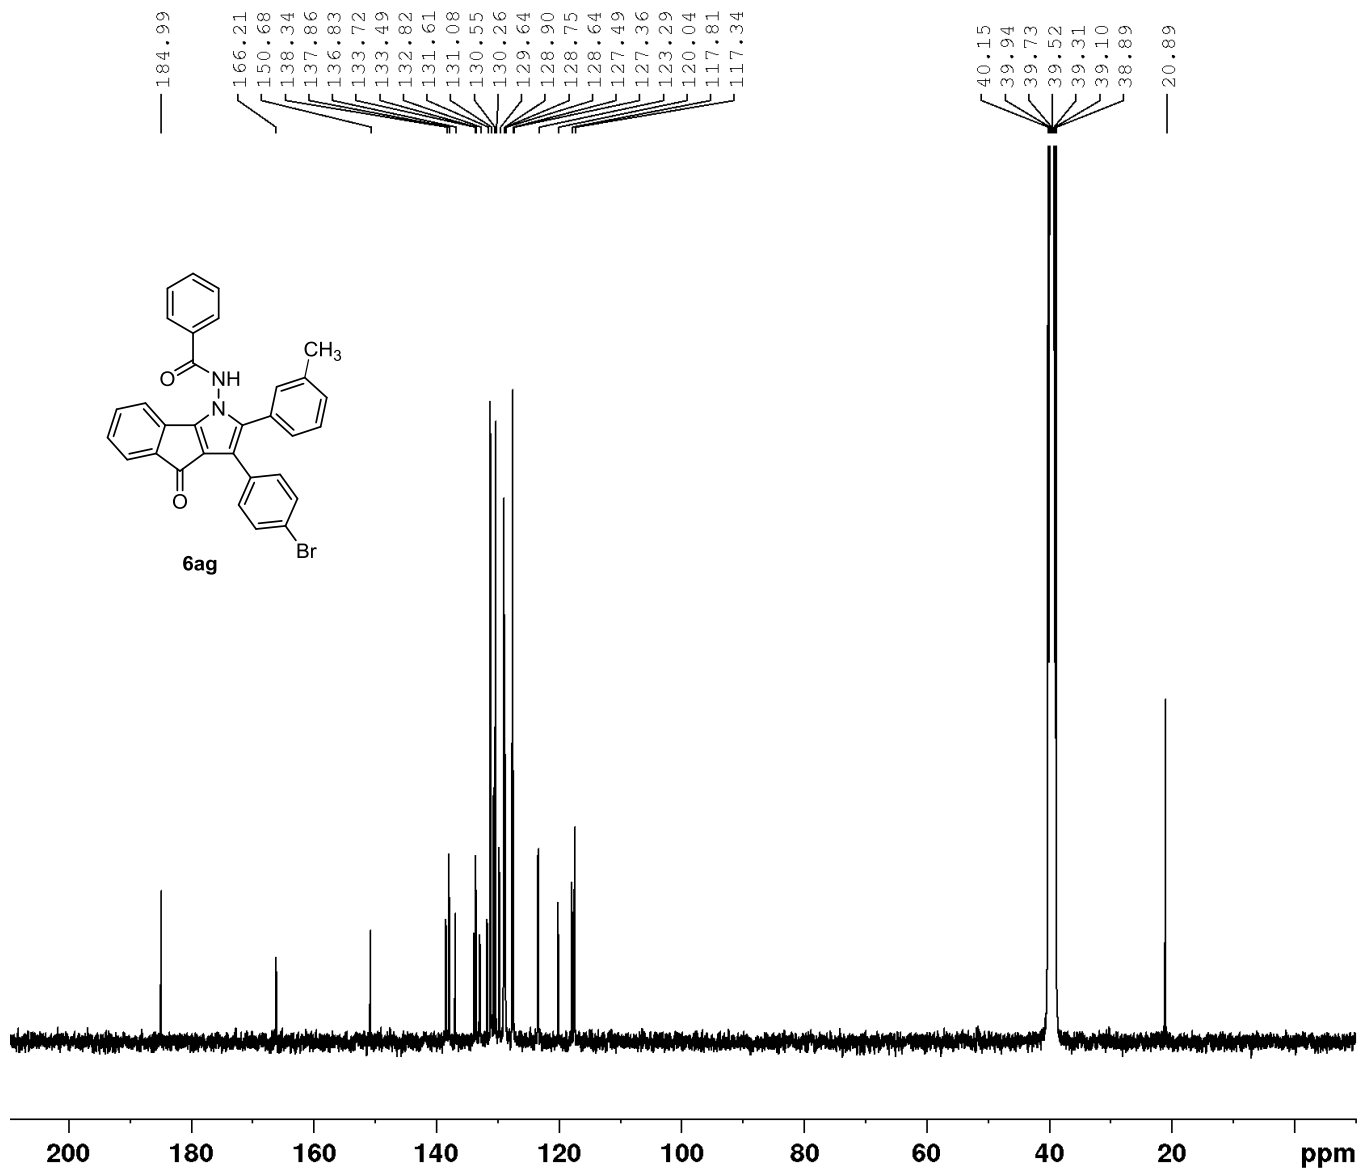

Current Data Parameters  
 NAME 18  
 EXPNO 2  
 PROCNO 1

F2 - Acquisition Parameters  
 Date\_ 20200426  
 Time 22.24  
 INSTRUM spect  
 PROBHD 5 mm PABBO BB/  
 PULPROG zgpg30  
 TD 32768  
 SOLVENT DMSO  
 NS 15233  
 DS 0  
 SWH 24038.461 Hz  
 FIDRES 0.733596 Hz  
 AQ 0.6815744 sec  
 RG 198.09  
 DW 20.800 usec  
 DE 6.50 usec  
 TE 298.0 K  
 D1 2.00000000 sec  
 D11 0.03000000 sec  
 TD0 1

===== CHANNEL f1 =====  
 SFO1 100.6228298 MHz  
 NUC1 13C  
 P1 10.00 usec  
 PLW1 47.50000000 W

===== CHANNEL f2 =====  
 SFO2 400.1316005 MHz  
 NUC2 1H  
 CPDPRG[2] waltz16  
 PCPD2 90.00 usec  
 PLW2 15.00000000 W  
 PLW12 0.33750001 W  
 PLW13 0.27338001 W

F2 - Processing parameters  
 SI 32768  
 SF 100.6128180 MHz  
 WDW EM  
 SSB 0  
 LB 2.00 Hz  
 GB 0  
 PC 1.00

<sup>1</sup>H NMR Spectrum of **6ah** (CDCl<sub>3</sub>, 400 MHz)

8.932  
7.709  
7.690  
7.609  
7.591  
7.572  
7.462  
7.442  
7.423  
7.343  
7.321  
7.295  
7.273  
7.262  
7.235  
7.215  
7.195  
7.094  
7.076  
7.058  
7.036  
7.018  
6.999  
6.889  
6.884  
6.866  
6.862  
6.846  
6.829  
6.753  
6.736  
3.632  
1.622  
0.000

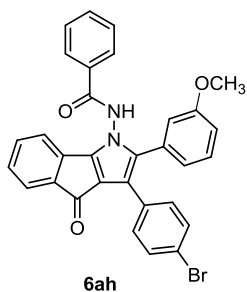

Current Data Parameters  
NAME 16  
EXPNO 3  
PROCNO 1

F2 - Acquisition Parameters  
Date\_ 20200421  
Time 1.05  
INSTRUM spect  
PROBHD 5 mm PABBO BB/  
PULPROG zg30  
TD 32768  
SOLVENT CDCl3  
NS 32  
DS 0  
SWH 7211.539 Hz  
FIDRES 0.220079 Hz  
AQ 2.2719147 sec  
RG 198.09  
DW 69.333 usec  
DE 10.06 usec  
TE 294.9 K  
D1 2.00000000 sec  
TD0 1

==== CHANNEL f1 =====  
SFO1 400.1324008 MHz  
NUC1 1H  
P1 15.00 usec  
PLW1 11.39999962 W

F2 - Processing parameters  
SI 16384  
SF 400.1300088 MHz  
WDW EM  
SSB 0  
LB 0 Hz  
GB 0  
PC 1.00

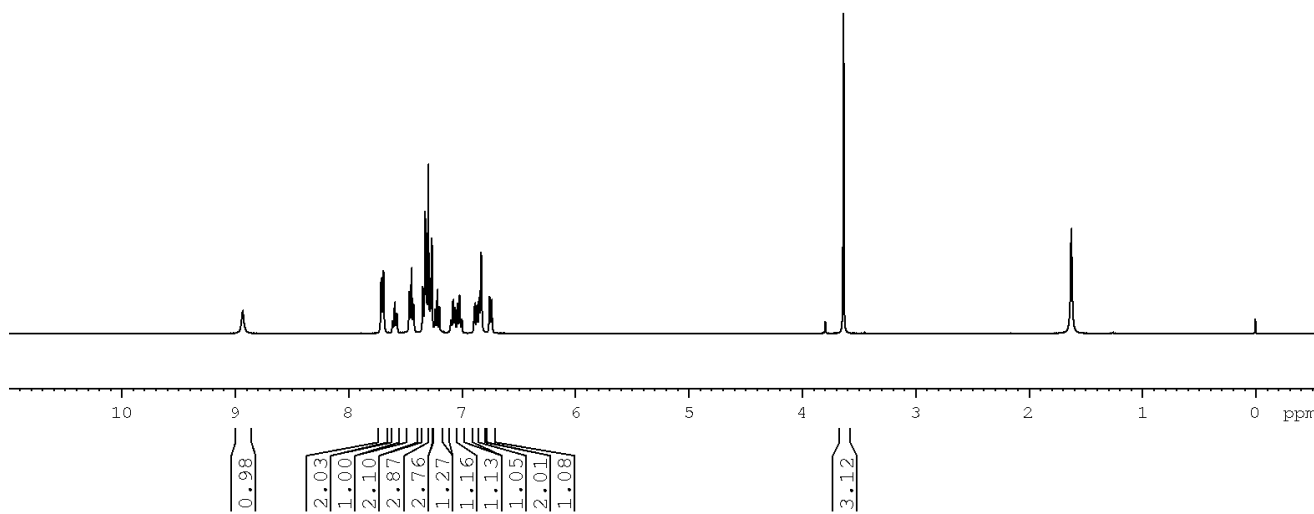



<sup>13</sup>C NMR Spectrum of **6ah** (CDCl<sub>3</sub>, 100 MHz)

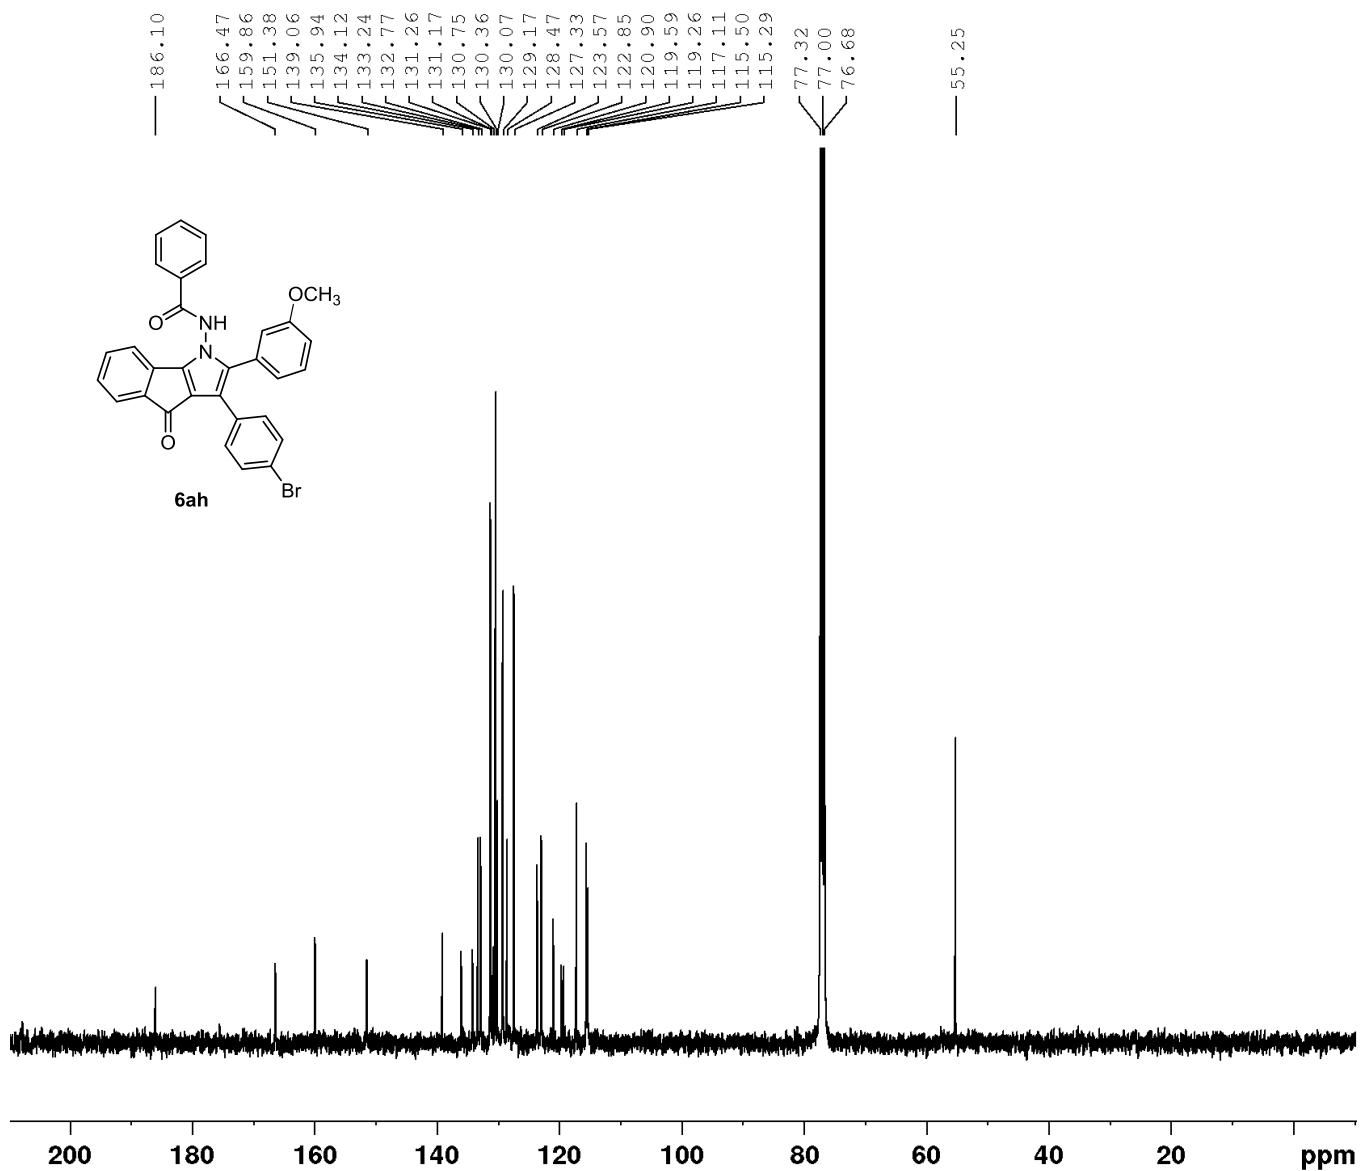

Current Data Parameters  
NAME 16  
EXPNO 4  
PROCNO 1

F2 - Acquisition Parameters  
Date\_ 20200421  
Time 1.11  
INSTRUM spect  
PROBHD 5 mm PABBO BB/  
PULPROG zgpg30  
TD 32768  
SOLVENT CDCl3  
NS 12512  
DS 0  
SWH 24038.461 Hz  
FIDRES 0.733596 Hz  
AQ 0.6815744 sec  
RG 198.09  
DW 20.800 usec  
DE 6.50 usec  
TE 295.8 K  
D1 2.00000000 sec  
D11 0.03000000 sec  
TD0 1

===== CHANNEL f1 =====  
SFO1 100.6228298 MHz  
NUC1 13C  
P1 10.00 usec  
PLW1 49.50000000 W

===== CHANNEL f2 =====  
SFO2 400.1316005 MHz  
NUC2 1H  
CPDPRG[2] waltz16  
PCPD2 90.00 usec  
PLW2 12.50000000 W  
PLW12 0.34722000 W  
PLW13 0.28125000 W

F2 - Processing parameters  
SI 32768  
SF 100.6127698 MHz  
WDW EM  
SSB 0  
LB 2.00 Hz  
GB 0  
PC 1.00

<sup>1</sup>H NMR Spectrum of 6ai (CDCl<sub>3</sub>, 400 MHz)

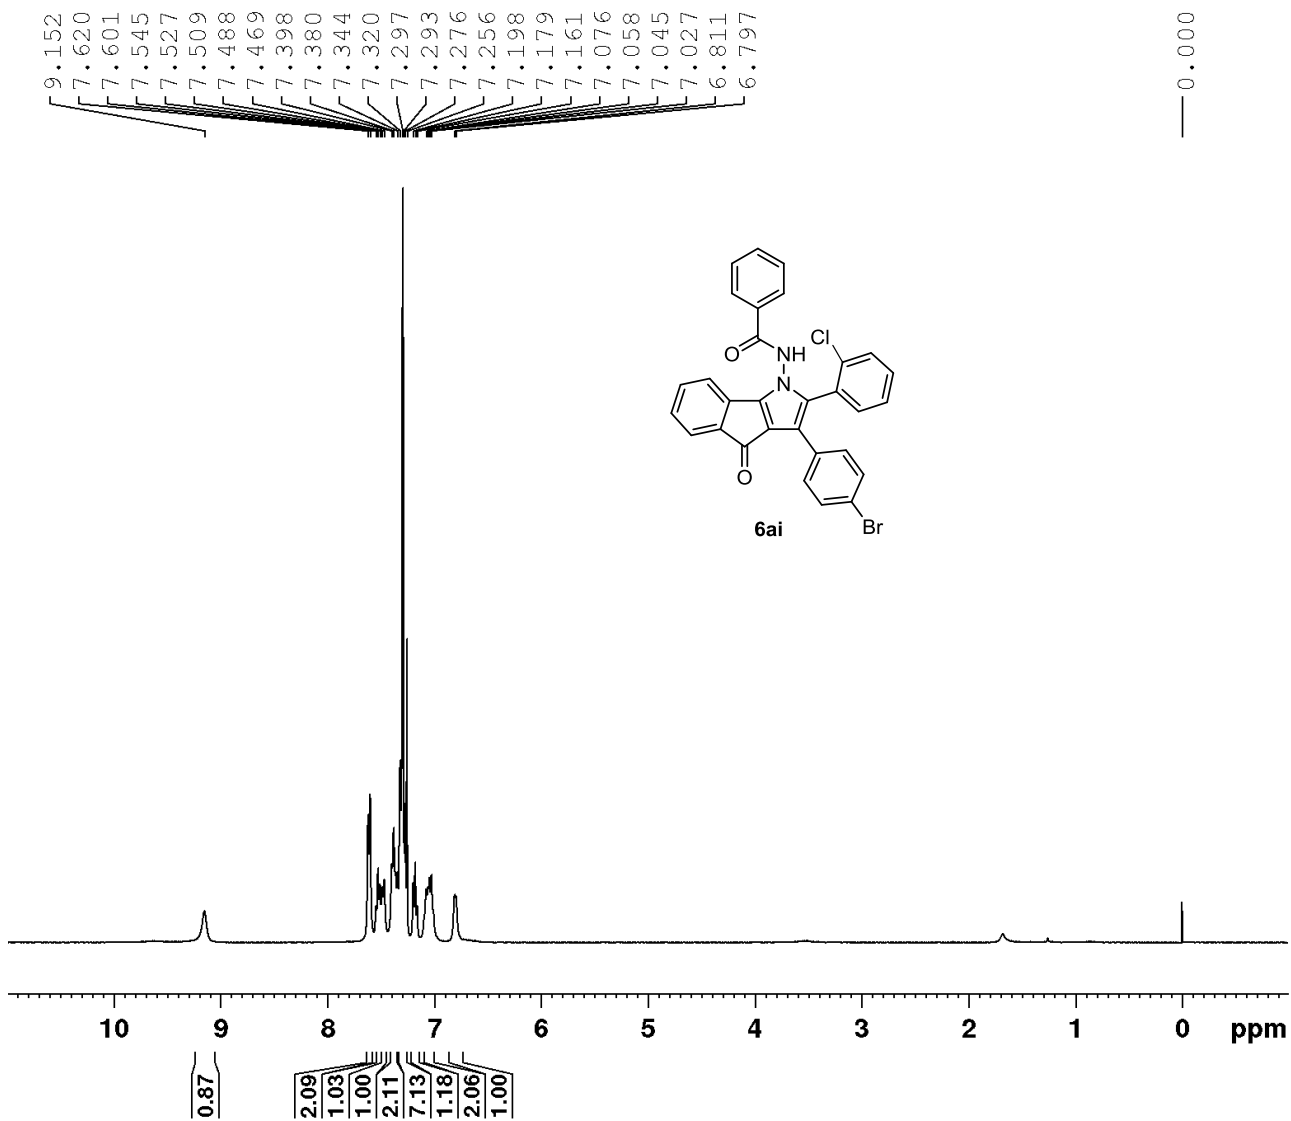

Current Data Parameters  
NAME bc 2-Cl  
EXPNO 1  
PROCNO 1

F2 - Acquisition Parameters  
Date\_ 20200317  
Time 11.56  
INSTRUM spect  
PROBHD 5 mm BBO BB-1H  
PULPROG zg30  
TD 32768  
SOLVENT CDCl3  
NS 16  
DS 0  
SWH 7246.377 Hz  
FIDRES 0.221142 Hz  
AQ 2.2609921 sec  
RG 161.3  
DW 69.000 usec  
DE 6.50 usec  
TE 296.2 K  
D1 2.00000000 sec  
TDO 1

==== CHANNEL f1 =====  
NUC1 1H  
P1 15.00 usec  
PL1 11.10 dB  
SFO1 400.1324008 MHz

F2 - Processing parameters  
SI 16384  
SF 400.1300112 MHz  
WDW EM  
SSB 0  
LB 0 Hz  
GB 0  
PC 1.00

<sup>13</sup>C NMR Spectrum of **6ai** (CDCl<sub>3</sub>, 100 MHz)

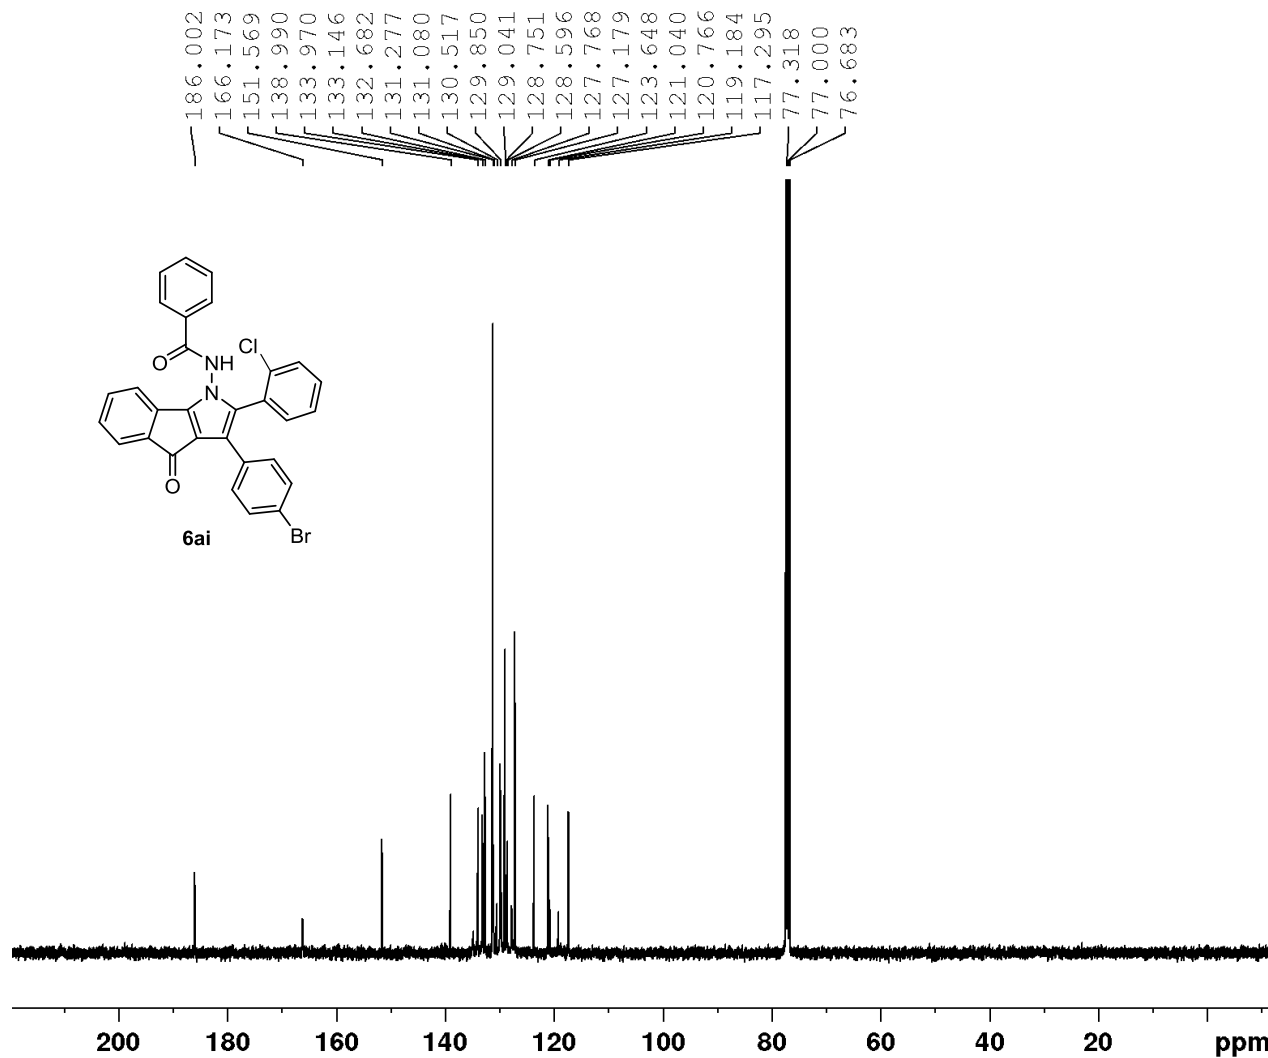

Current Data Parameters  
NAME bc 2-Cl  
EXPNO 2  
PROCNO 1

F2 - Acquisition Parameters  
Date\_ 20200317  
Time 11.59  
INSTRUM spect  
PROBHD 5 mm BBO BB-1H  
PULPROG zgpg30  
TD 32768  
SOLVENT CDCl3  
NS 2085  
DS 0  
SWH 24038.461 Hz  
FIDRES 0.733596 Hz  
AQ 0.6815744 sec  
RG 5792.6  
DW 20.800 usec  
DE 6.50 usec  
TE 296.1 K  
D1 2.00000000 sec  
D11 0.03000000 sec  
TD0 1

==== CHANNEL f1 =====  
NUC1 13C  
P1 10.00 usec  
PL1 3.80 dB  
SFO1 100.6233325 MHz

==== CHANNEL f2 =====  
CPDPRG[2] waltz16  
NUC2 1H  
PCPD2 90.00 usec  
PL2 10.20 dB  
PL12 26.00 dB  
PL13 29.00 dB  
SFO2 400.1316005 MHz

F2 - Processing parameters  
SI 32768  
SF 100.6127724 MHz  
WDW EM  
SSB 0  
LB 1.00 Hz  
GB 0  
PC 1.00

<sup>1</sup>H NMR Spectrum of 6aj (CDCl<sub>3</sub>, 400 MHz)

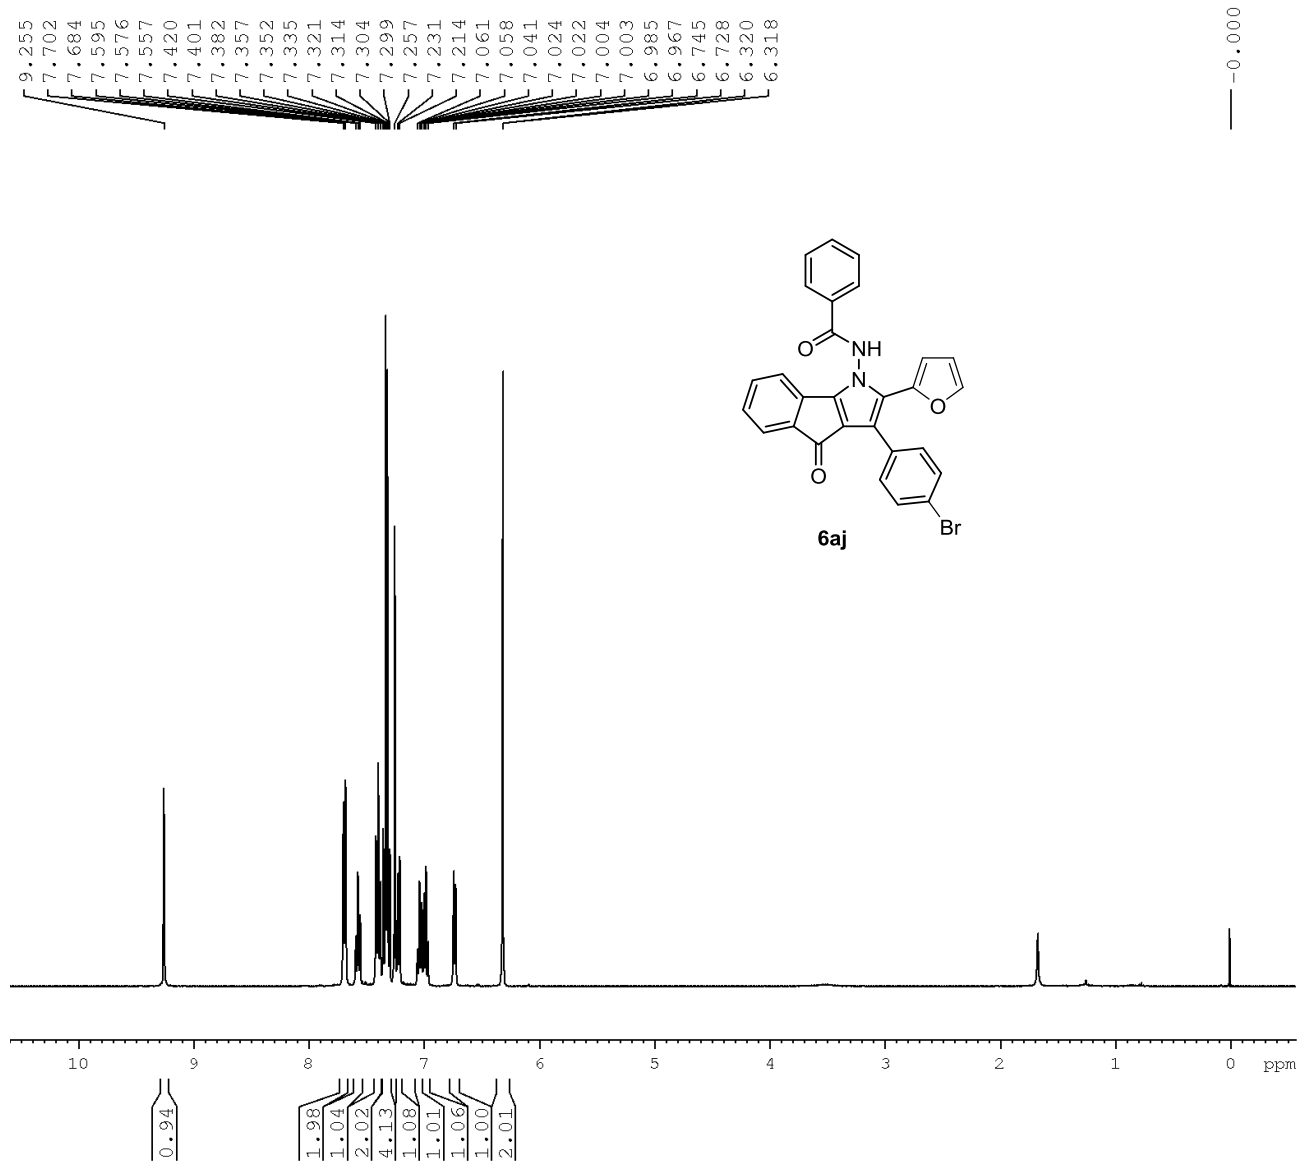

Current Data Parameters  
NAME Bc Furyl  
EXPNO 1  
PROCNO 1

F2 - Acquisition Parameters  
Date\_ 20200303  
Time 21.54  
INSTRUM spect  
PROBHD 5 mm BBO BB-1H  
PULPROG zg30  
TD 32768  
SOLVENT CDCl3  
NS 16  
DS 0  
SWH 7246.377 Hz  
FIDRES 0.221142 Hz  
AQ 2.2609921 sec  
RG 181  
DW 69.000 usec  
DE 6.50 usec  
TE 296.4 K  
D1 2.00000000 sec  
TDO 1

==== CHANNEL f1 =====  
NUC1 1H  
P1 15.00 usec  
PL1 11.10 dB  
SFO1 400.1324008 MHz

F2 - Processing parameters  
SI 16384  
SF 400.1300105 MHz  
WDW EM  
SSB 0  
LB 0 Hz  
GB 0  
PC 1.00

<sup>13</sup>C NMR Spectrum of **6aj** (CDCl<sub>3</sub>, 100 MHz)

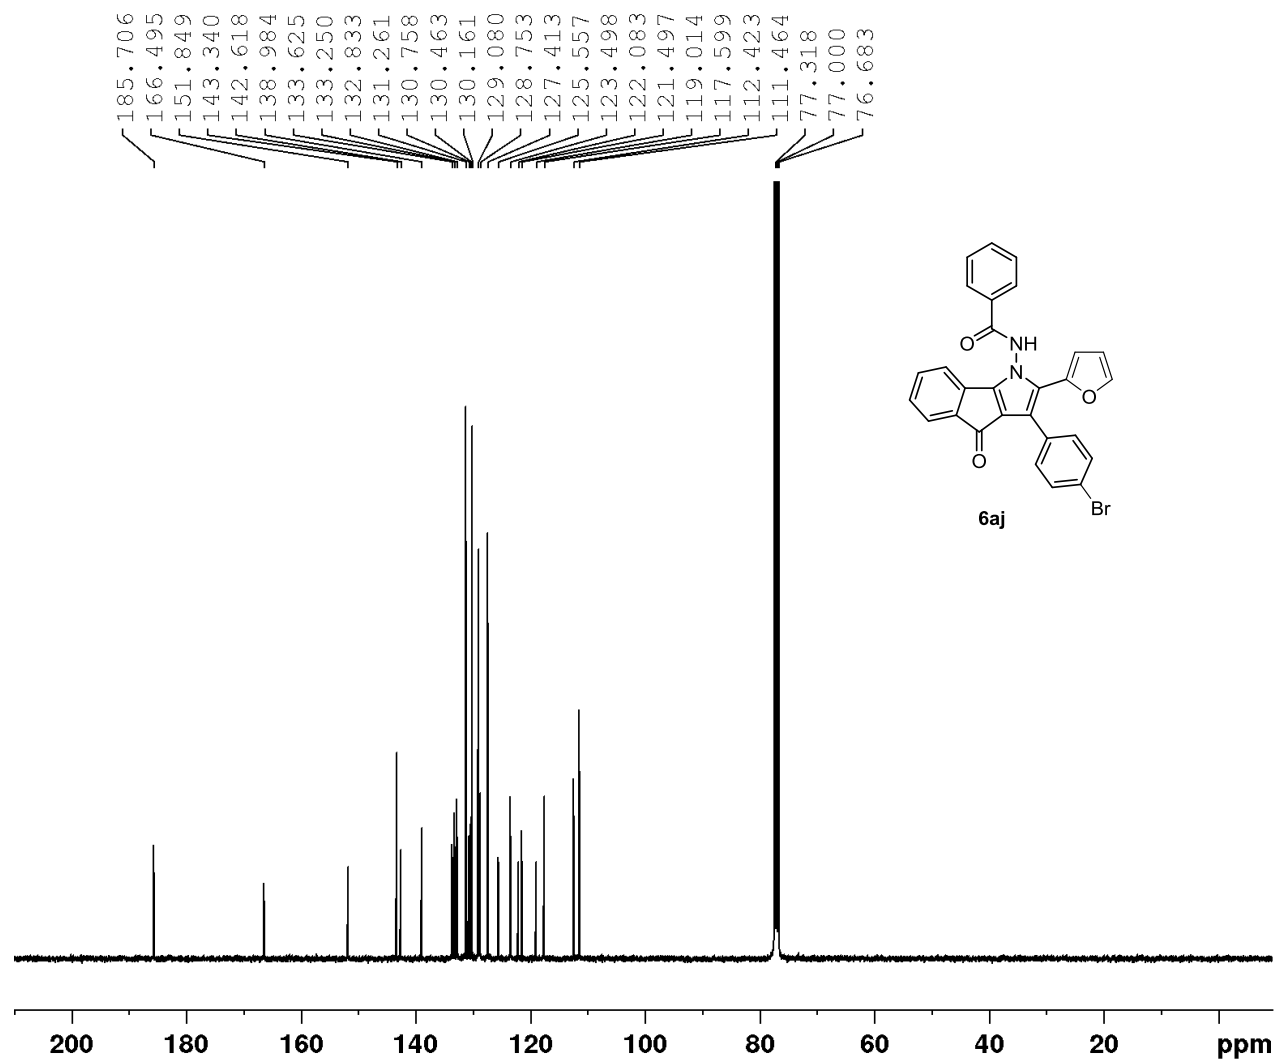

Current Data Parameters  
NAME Bc Furyl  
EXPNO 2  
PROCNO 1

F2 - Acquisition Parameters  
Date\_ 20200303  
Time 21.56  
INSTRUM spect  
PROBHD 5 mm BBO BB-1H  
PULPROG zgpg30  
TD 32768  
SOLVENT CDCl3  
NS 15000  
DS 0  
SWH 24038.461 Hz  
FIDRES 0.733596 Hz  
AQ 0.6815744 sec  
RG 8192  
DW 20.800 usec  
DE 6.50 usec  
TE 296.4 K  
D1 2.00000000 sec  
D11 0.03000000 sec  
TD0 1

==== CHANNEL f1 =====  
NUC1 13C  
P1 10.00 usec  
PL1 3.80 dB  
SFO1 100.6233325 MHz

==== CHANNEL f2 =====  
CPDPRG[2] waltz16  
NUC2 1H  
PCPD2 90.00 usec  
PL2 10.20 dB  
PL12 26.00 dB  
PL13 29.00 dB  
SFO2 400.1316005 MHz

F2 - Processing parameters  
SI 32768  
SF 100.6127710 MHz  
WDW EM  
SSB 0  
LB 1.00 Hz  
GB 0  
PC 1.00

<sup>1</sup>H NMR Spectrum of **7ak** (CDCl<sub>3</sub>, 400 MHz)

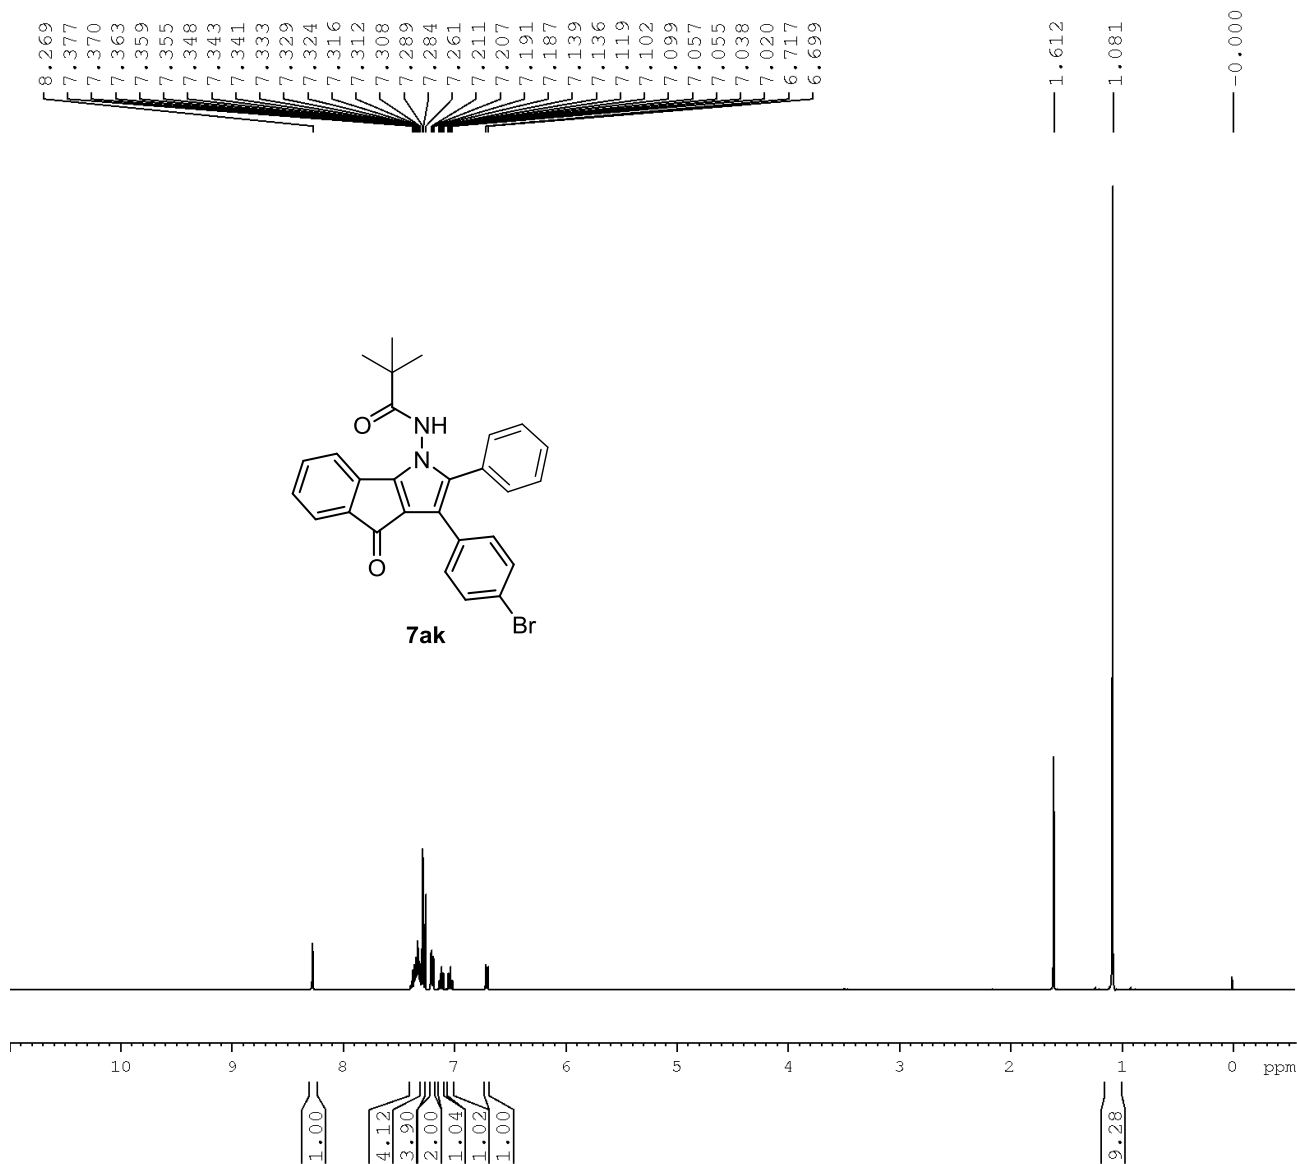

Current Data Parameters  
 NAME 452  
 EXPNO 1  
 PROCNO 1

F2 - Acquisition Parameters  
 Date\_ 20200422  
 Time 22.15  
 INSTRUM spect  
 PROBHD 5 mm BBO BB-1H  
 PULPROG zg30  
 TD 32768  
 SOLVENT CDCl3  
 NS 32  
 DS 0  
 SWH 7246.377 Hz  
 FIDRES 0.221142 Hz  
 AQ 2.2609921 sec  
 RG 256  
 DW 69.000 usec  
 DE 6.50 usec  
 TE 296.6 K  
 D1 2.00000000 sec  
 TD0 1

==== CHANNEL f1 =====  
 NUC1 1H  
 P1 15.00 usec  
 PL1 11.10 dB  
 SFO1 400.1324008 MHz

F2 - Processing parameters  
 SI 16384  
 SF 400.1300101 MHz  
 WDW EM  
 SSB 0  
 LB 0 Hz  
 GB 0  
 PC 1.00

<sup>13</sup>C NMR Spectrum of **7ak** (CDCl<sub>3</sub>, 100 MHz)

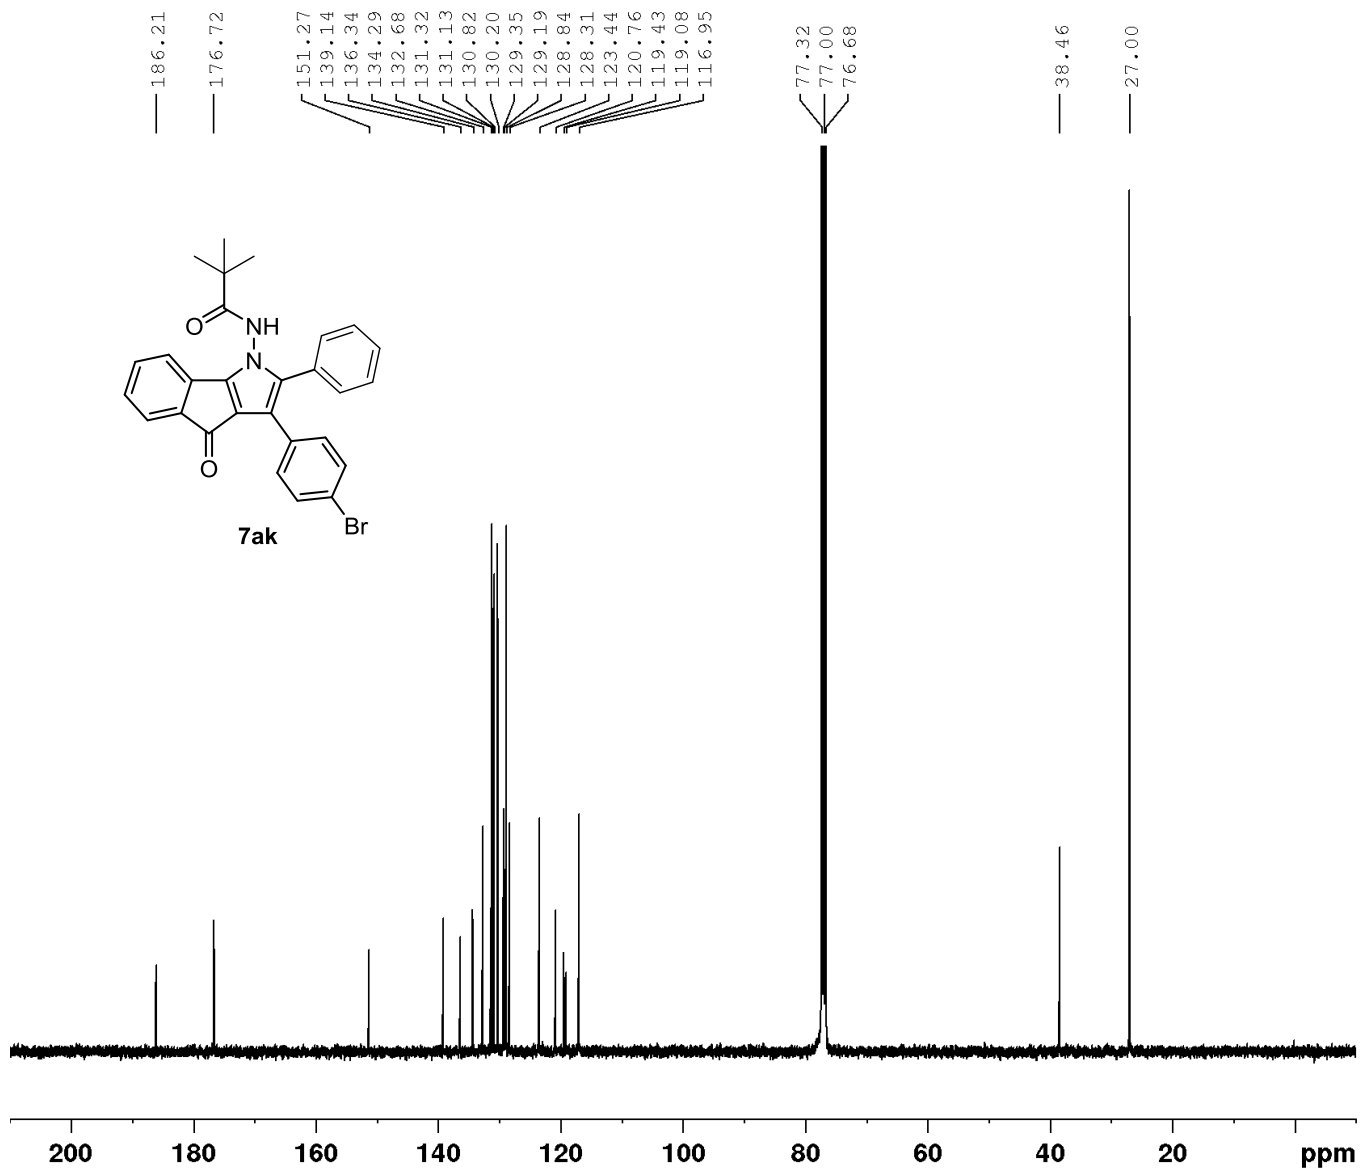

Current Data Parameters  
NAME 452  
EXPNO 2  
PROCNO 1

F2 - Acquisition Parameters  
Date\_ 20200422  
Time 22.18  
INSTRUM spect  
PROBHD 5 mm BBO BB-1H  
PULPROG zgpg30  
TD 32768  
SOLVENT CDCl3  
NS 14849  
DS 0  
SWH 24038.461 Hz  
FIDRES 0.733596 Hz  
AQ 0.6815744 sec  
RG 9195.2  
DW 20.800 usec  
DE 6.50 usec  
TE 296.6 K  
D1 2.00000000 sec  
D11 0.03000000 sec  
TD0 1

=====  
CHANNEL f1  
NUC1 13C  
P1 10.00 usec  
PL1 3.80 dB  
SFO1 100.6233325 MHz

=====  
CHANNEL f2  
CPDPRG[2] waltz16  
NUC2 1H  
PCPD2 90.00 usec  
PL2 10.20 dB  
PL12 26.00 dB  
PL13 29.00 dB  
SFO2 400.1316005 MHz

F2 - Processing parameters  
SI 32768  
SF 100.6127696 MHz  
WDW EM  
SSB 0  
LB 1.00 Hz  
GB 0  
PC 1.00

<sup>1</sup>H NMR Spectrum of **7ik** (CDCl<sub>3</sub>, 400 MHz)

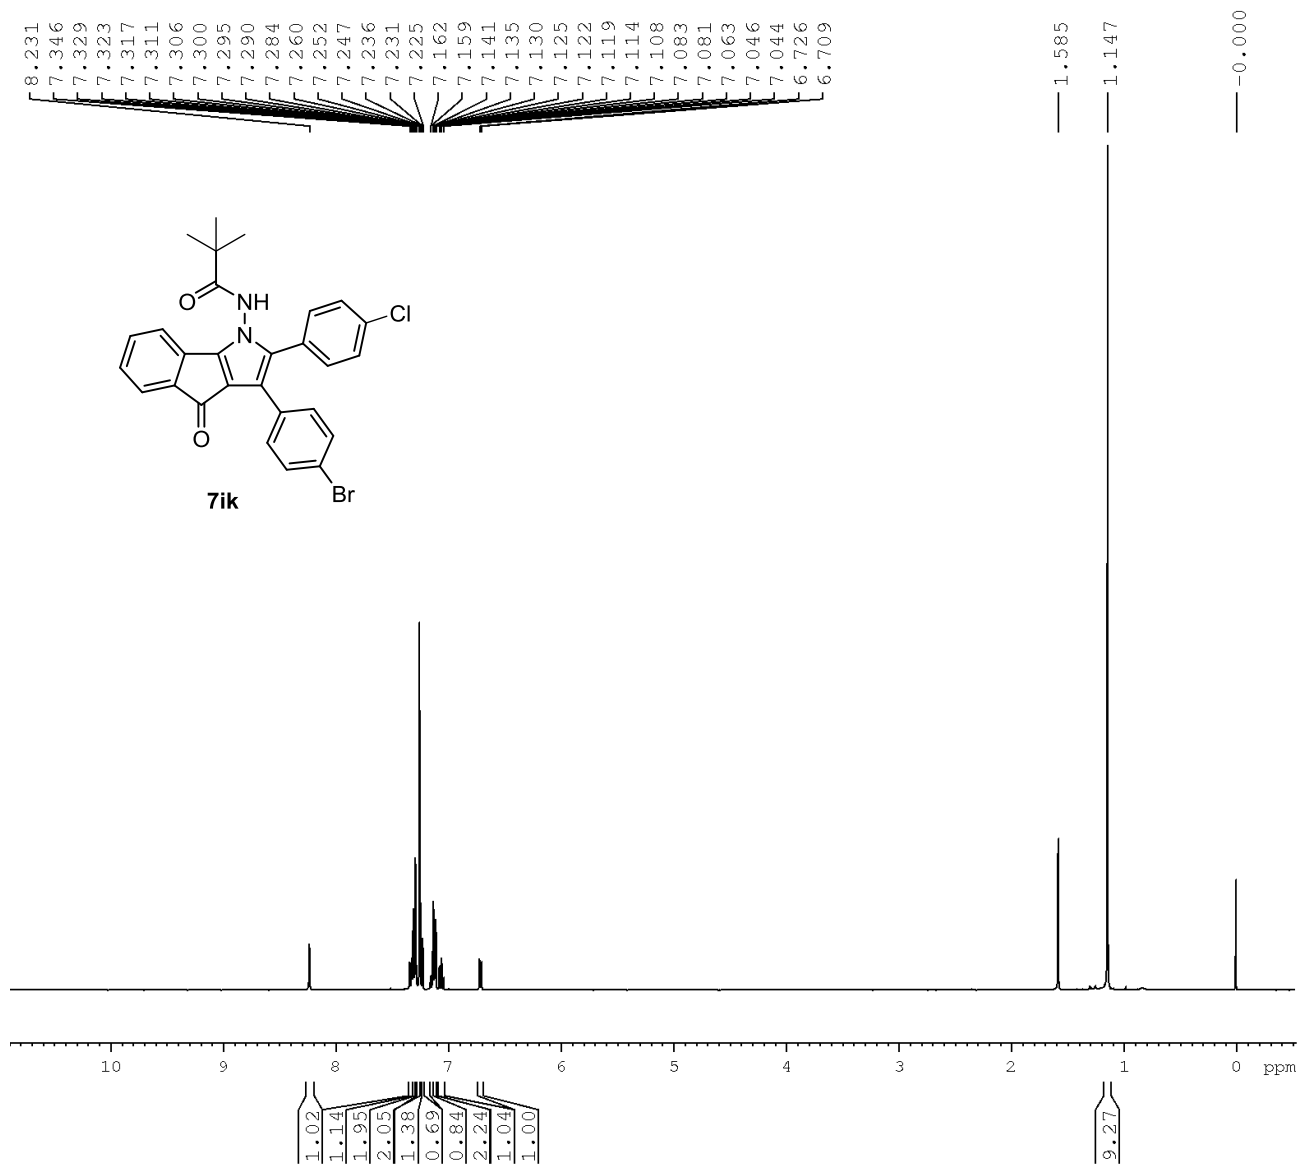

Current Data Parameters  
 NAME SW 876-1  
 EXPNO 2  
 PROCNO 1

F2 - Acquisition Parameters  
 Date\_ 20200520  
 Time 10.09  
 INSTRUM spect  
 PROBHD 5 mm PABBO BB/  
 PULPROG zg30  
 TD 32768  
 SOLVENT CDCl3  
 NS 64  
 DS 0  
 SWH 7211.539 Hz  
 FIDRES 0.220079 Hz  
 AQ 2.2719147 sec  
 RG 198.09  
 DW 69.333 usec  
 DE 10.06 usec  
 TE 298.1 K  
 D1 2.00000000 sec  
 TDO 1

==== CHANNEL f1 =====  
 SF01 400.1324008 MHz  
 NUC1 1H  
 P1 15.00 usec  
 PLW1 11.39999962 W

F2 - Processing parameters  
 SI 16384  
 SF 400.1300092 MHz  
 WDW EM  
 SSB 0  
 LB 0 Hz  
 GB 0  
 PC 1.00



<sup>13</sup>C NMR Spectrum of **7ik** (CDCl<sub>3</sub>, 100 MHz)

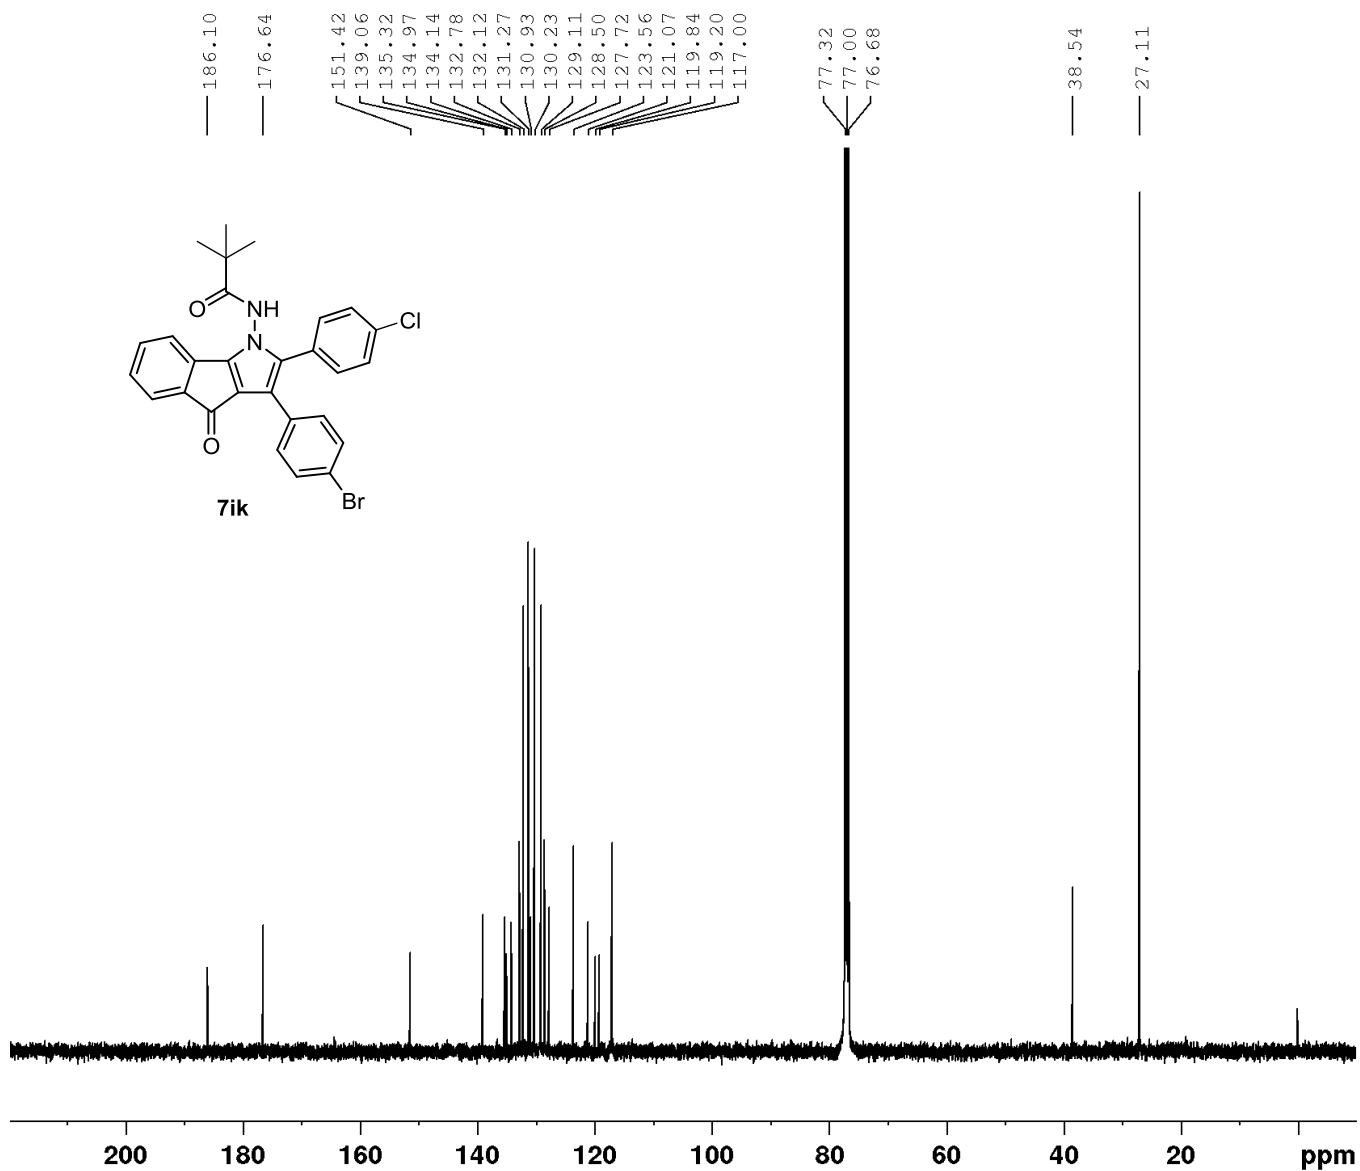

Current Data Parameters  
NAME SW 876  
EXPNO 2  
PROCNO 1

F2 - Acquisition Parameters  
Date\_ 20200519  
Time 23.47  
INSTRUM spect  
PROBHD 5 mm BBO BB-1H  
PULPROG zgpg30  
TD 32768  
SOLVENT CDCl3  
NS 13144  
DS 0  
SWH 24038.461 Hz  
FIDRES 0.733596 Hz  
AQ 0.6815744 sec  
RG 9195.2  
DW 20.800 usec  
DE 6.50 usec  
TE 296.6 K  
D1 2.00000000 sec  
D11 0.03000000 sec  
TD0 1

=====  
CHANNEL f1  
NUC1 13C  
P1 10.00 usec  
PL1 3.80 dB  
SFO1 100.6233325 MHz

=====  
CHANNEL f2  
CPDPRG[2] waltz16  
NUC2 1H  
PCPD2 90.00 usec  
PL2 10.20 dB  
PL12 26.00 dB  
PL13 29.00 dB  
SFO2 400.1316005 MHz

F2 - Processing parameters  
SI 32768  
SF 100.6127700 MHz  
WDW EM  
SSB 0  
LB 1.00 Hz  
GB 0  
PC 1.00

<sup>1</sup>H NMR Spectrum of 7jk (CDCl<sub>3</sub>, 400 MHz)

8.639  
7.258  
7.226  
7.203  
7.054  
7.046  
7.037  
7.025  
7.012  
6.991  
6.965  
6.947  
6.928  
6.636  
6.618

2.310

1.035

0.000

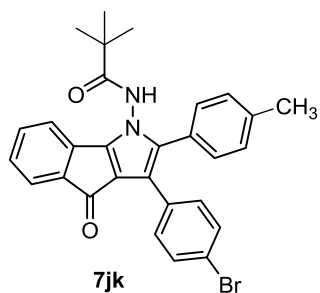

Current Data Parameters  
NAME SW 875-1  
EXPNO 1  
PROCNO 1

F2 - Acquisition Parameters  
Date\_ 20200520  
Time 10.03  
INSTRUM spect  
PROBHD 5 mm PABBO BB/  
PULPROG zg30  
TD 32768  
SOLVENT CDCl3  
NS 32  
DS 0  
SWH 7211.539 Hz  
FIDRES 0.220079 Hz  
AQ 2.2719147 sec  
RG 71.42  
DW 69.333 usec  
DE 10.06 usec  
TE 299.1 K  
D1 2.00000000 sec  
TD0 1

==== CHANNEL f1 =====  
SFO1 400.1324008 MHz  
NUC1 1H  
P1 15.00 usec  
PLW1 11.39999962 W

F2 - Processing parameters  
SI 16384  
SF 400.1300102 MHz  
WDW EM  
SSB 0  
LB 0 Hz  
GB 0  
PC 1.00

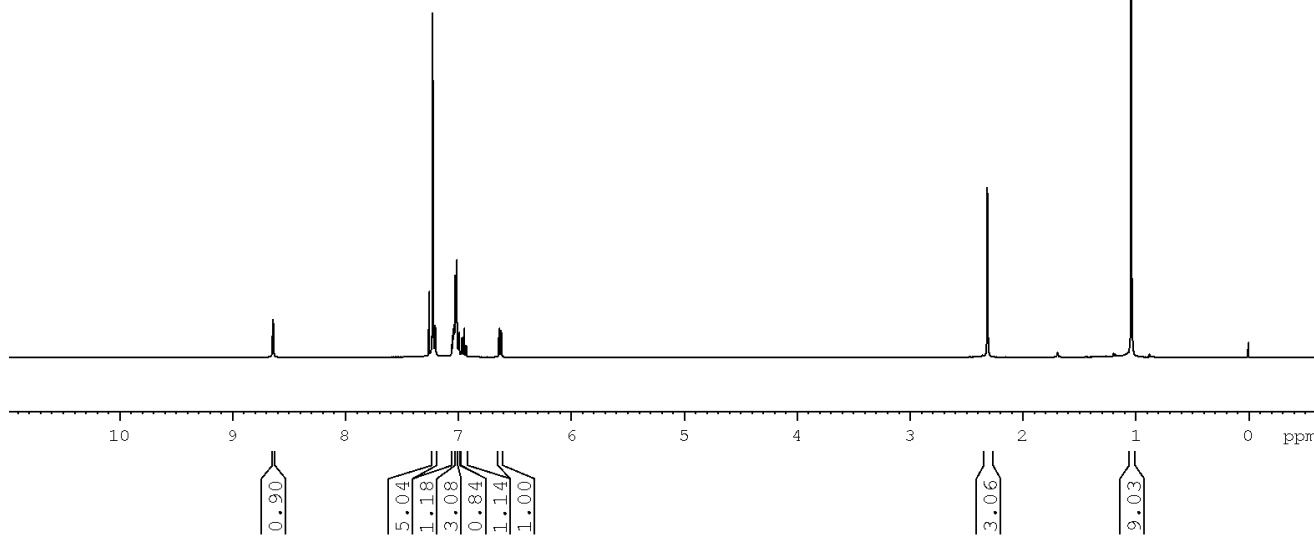

<sup>13</sup>C NMR Spectrum of **7jk** (CDCl<sub>3</sub>, 100 MHz)

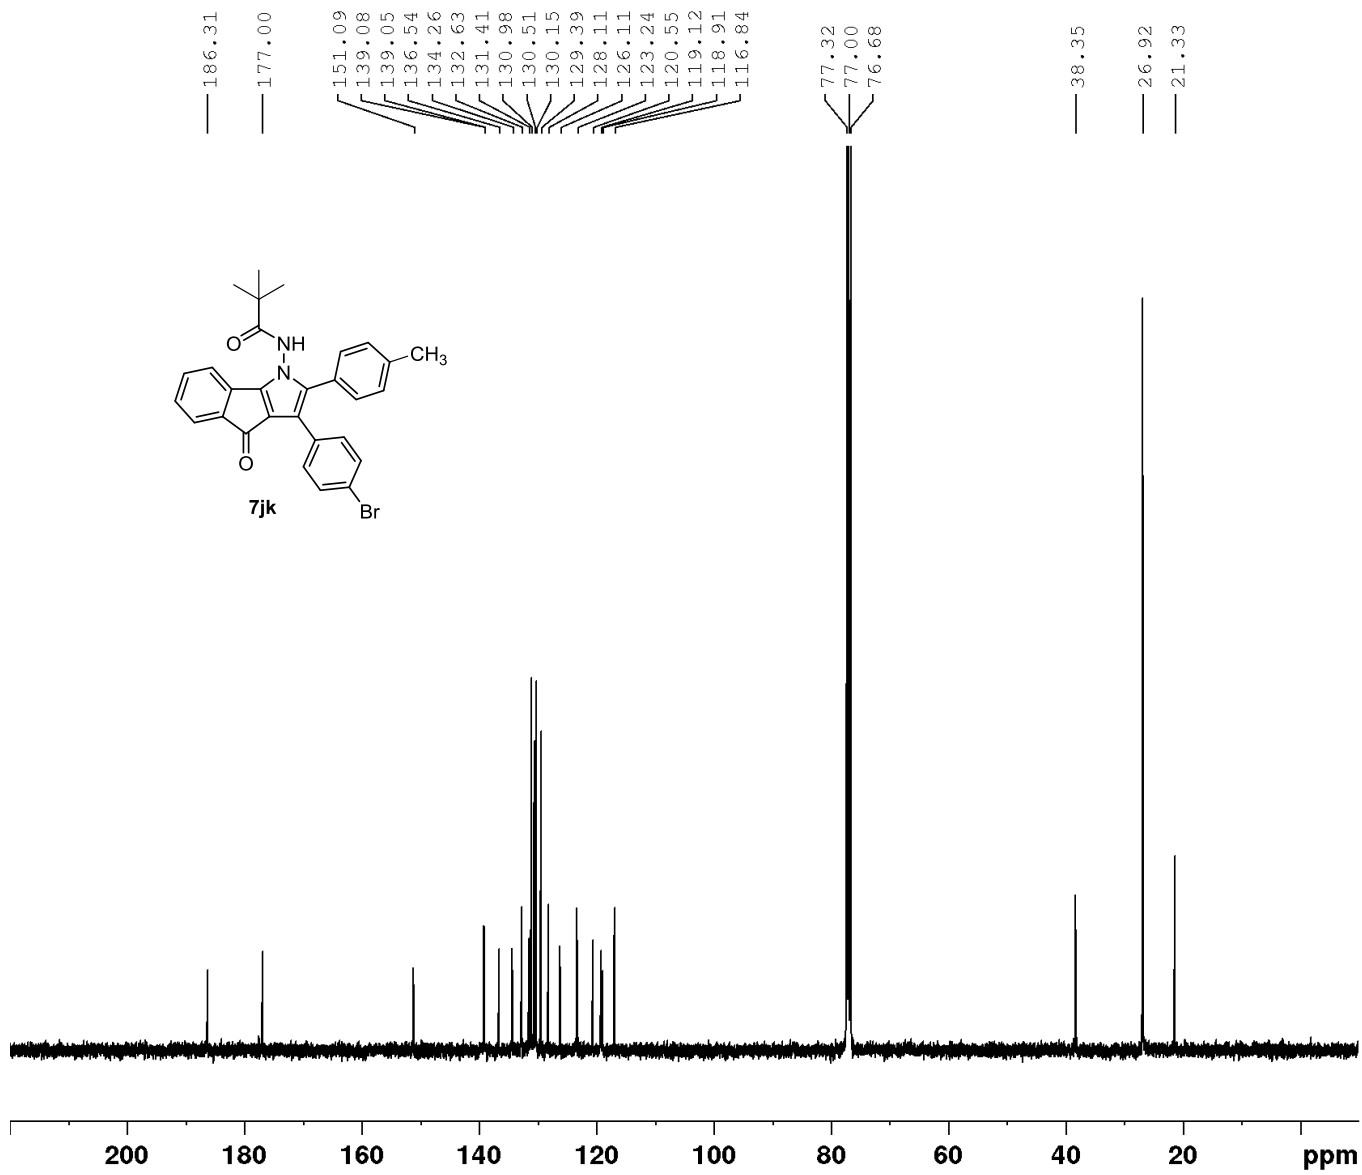

Current Data Parameters  
NAME SW 875  
EXPNO 3  
PROCNO 1

F2 - Acquisition Parameters  
Date\_ 20200519  
Time 22.17  
INSTRUM spect  
PROBHD 5 mm BBO BB-1H  
PULPROG zgpg30  
TD 32768  
SOLVENT CDCl3  
NS 1749  
DS 0  
SWH 24038.461 Hz  
FIDRES 0.733596 Hz  
AQ 0.6815744 sec  
RG 4096  
DW 20.800 usec  
DE 6.50 usec  
TE 296.0 K  
D1 2.00000000 sec  
D11 0.03000000 sec  
TD0 1

==== CHANNEL f1 =====  
NUC1 13C  
P1 10.00 usec  
PL1 3.80 dB  
SFO1 100.6233325 MHz

==== CHANNEL f2 =====  
CPDPRG[2] waltz16  
NUC2 1H  
PCPD2 90.00 usec  
PL2 10.20 dB  
PL12 26.00 dB  
PL13 29.00 dB  
SFO2 400.1316005 MHz

F2 - Processing parameters  
SI 32768  
SF 100.6127730 MHz  
WDW EM  
SSB 0  
LB 1.00 Hz  
GB 0  
PC 1.00

<sup>1</sup>H NMR Spectrum of 8aa (CDCl<sub>3</sub>, 400 MHz)

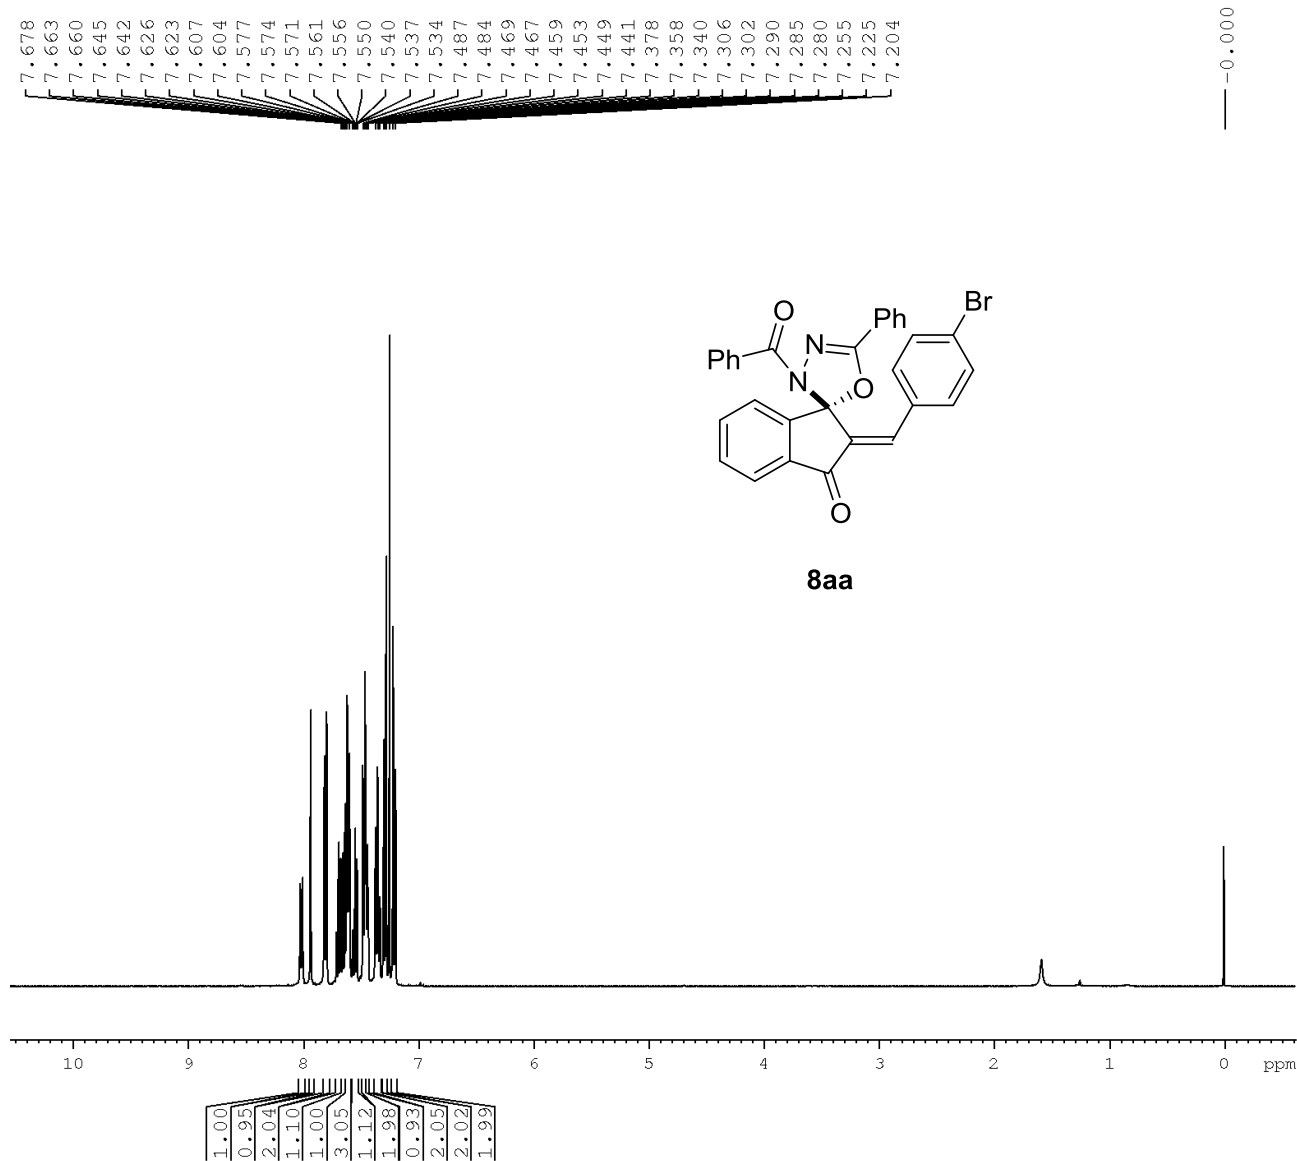

— -0.000

Current Data Parameters  
NAME SW 852-1  
EXPNO 1  
PROCNO 1

F2 - Acquisition Parameters  
Date\_ 20200520  
Time 21.56  
INSTRUM spect  
PROBHD 5 mm PABBO BB/  
PULPROG zg30  
TD 32768  
SOLVENT CDCl3  
NS 32  
DS 0  
SWH 7211.539 Hz  
FIDRES 0.220079 Hz  
AQ 2.2719147 sec  
RG 99.72  
DW 69.333 usec  
DE 10.06 usec  
TE 298.3 K  
D1 2.00000000 sec  
TDO 1

==== CHANNEL f1 =====  
SF01 400.1324008 MHz  
NUC1 1H  
P1 15.00 usec  
PLW1 11.39999962 W

F2 - Processing parameters  
SI 16384  
SF 400.1300115 MHz  
WDW EM  
SSB 0  
LB 0 Hz  
GB 0  
PC 1.00

<sup>13</sup>C NMR Spectrum of **8aa** (CDCl<sub>3</sub>, 100 MHz)

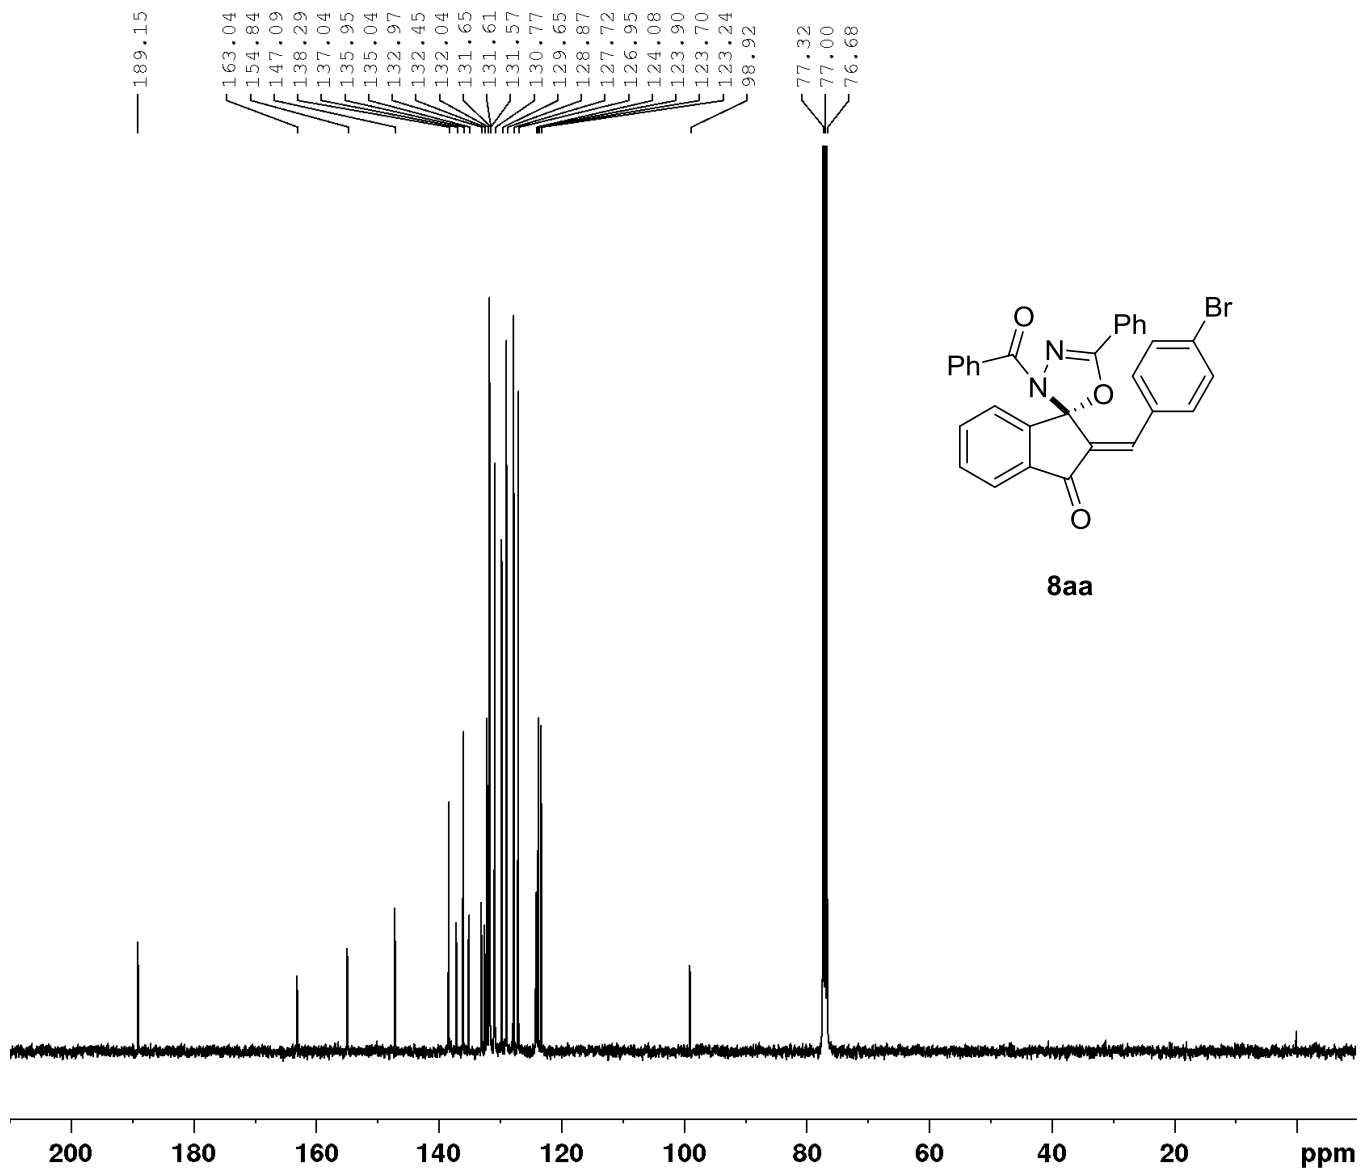

Current Data Parameters  
NAME SW 852-1  
EXPNO 2  
PROCNO 1

F2 - Acquisition Parameters  
Date\_ 20200520  
Time 21.59  
INSTRUM spect  
PROBHD 5 mm PABBO BB/  
PULPROG zgpg30  
TD 32768  
SOLVENT CDCl3  
NS 2377  
DS 0  
SWH 24038.461 Hz  
FIDRES 0.733596 Hz  
AQ 0.6815744 sec  
RG 198.09  
DW 20.800 usec  
DE 6.50 usec  
TE 298.3 K  
D1 2.00000000 sec  
D11 0.03000000 sec  
TD0 1

==== CHANNEL f1 =====  
SFO1 100.6228298 MHz  
NUC1 13C  
P1 10.00 usec  
PLW1 49.50000000 W

==== CHANNEL f2 =====  
SFO2 400.1316005 MHz  
NUC2 1H  
CPDPRG[2] waltz16  
PCPD2 90.00 usec  
PLW2 12.50000000 W  
PLW12 0.34722000 W  
PLW13 0.28125000 W

F2 - Processing parameters  
SI 32768  
SF 100.6127717 MHz  
WDW EM  
SSB 0  
LB 2.00 Hz  
GB 0  
PC 1.00

<sup>1</sup>H NMR Spectrum of **8ba** (CDCl<sub>3</sub>, 400 MHz)

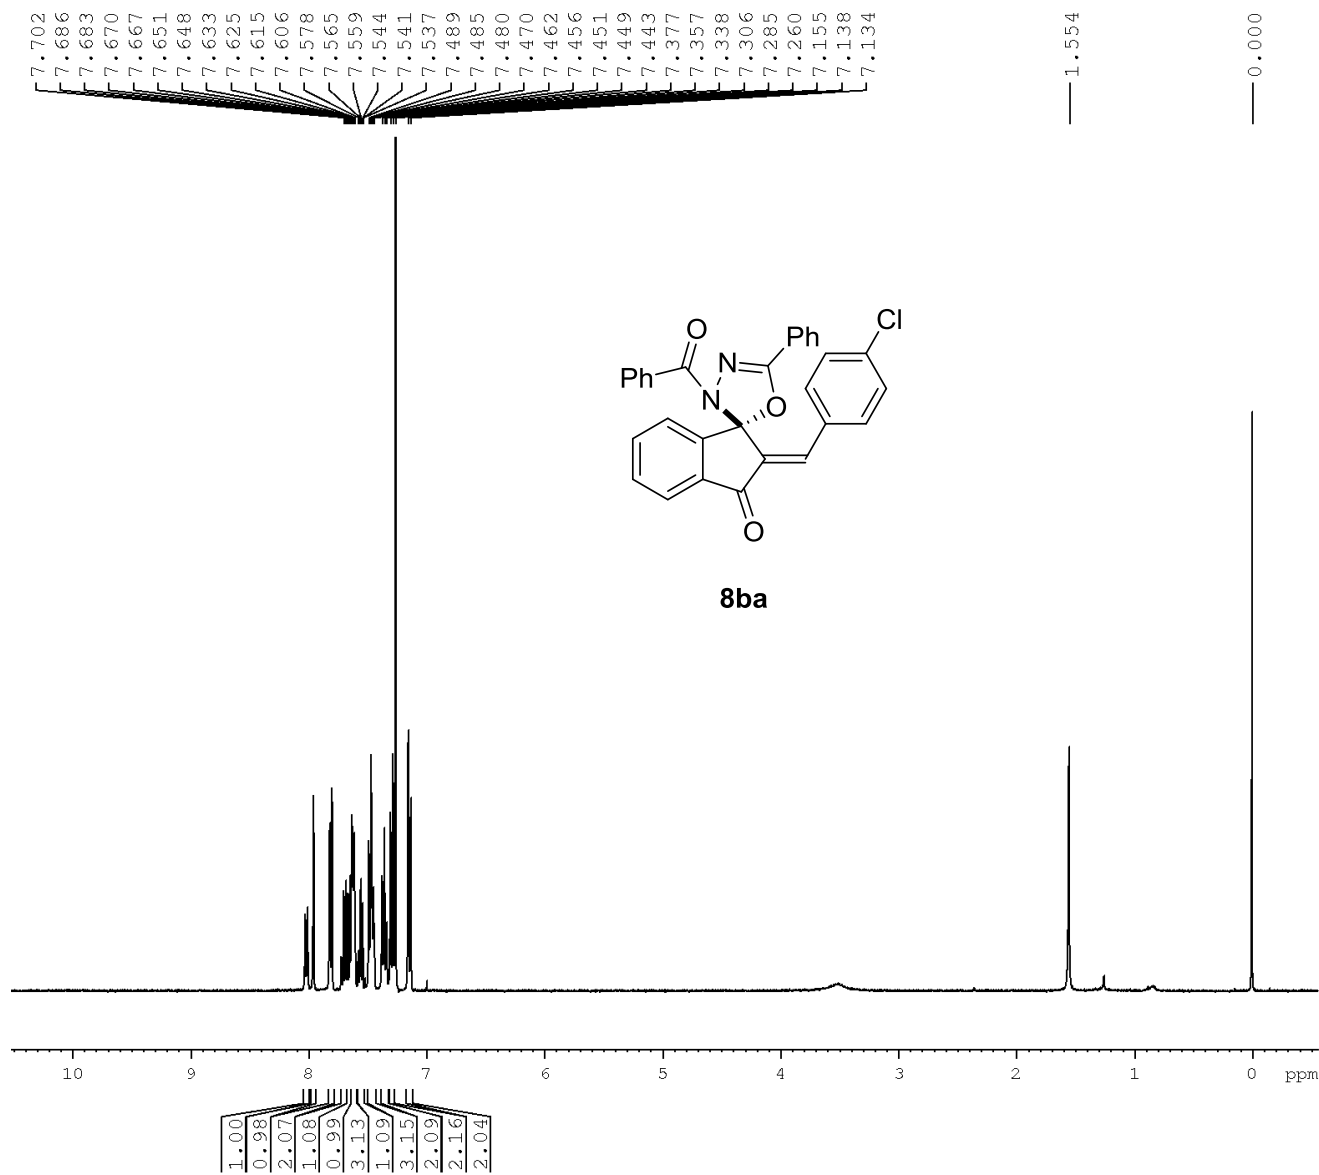

Current Data Parameters  
NAME SW 819  
EXPNO 4  
PROCNO 1

F2 - Acquisition Parameters  
Date\_ 20200523  
Time 21.07  
INSTRUM spect  
PROBHD 5 mm BBO BB-1H  
PULPROG zg30  
TD 32768  
SOLVENT CDCl3  
NS 32  
DS 0  
SWH 7246.377 Hz  
FIDRES 0.221142 Hz  
AQ 2.2609921 sec  
RG 362  
DW 69.000 usec  
DE 6.50 usec  
TE 295.8 K  
D1 2.00000000 sec  
TD0 1

==== CHANNEL f1 =====  
NUC1 1H  
P1 15.00 usec  
PL1 11.10 dB  
SFO1 400.1324008 MHz

F2 - Processing parameters  
SI 16384  
SF 400.1300106 MHz  
WDW EM  
SSB 0  
LB 0 Hz  
GB 0  
PC 1.00

<sup>13</sup>C NMR Spectrum of **8ba** (CDCl<sub>3</sub>, 100 MHz)

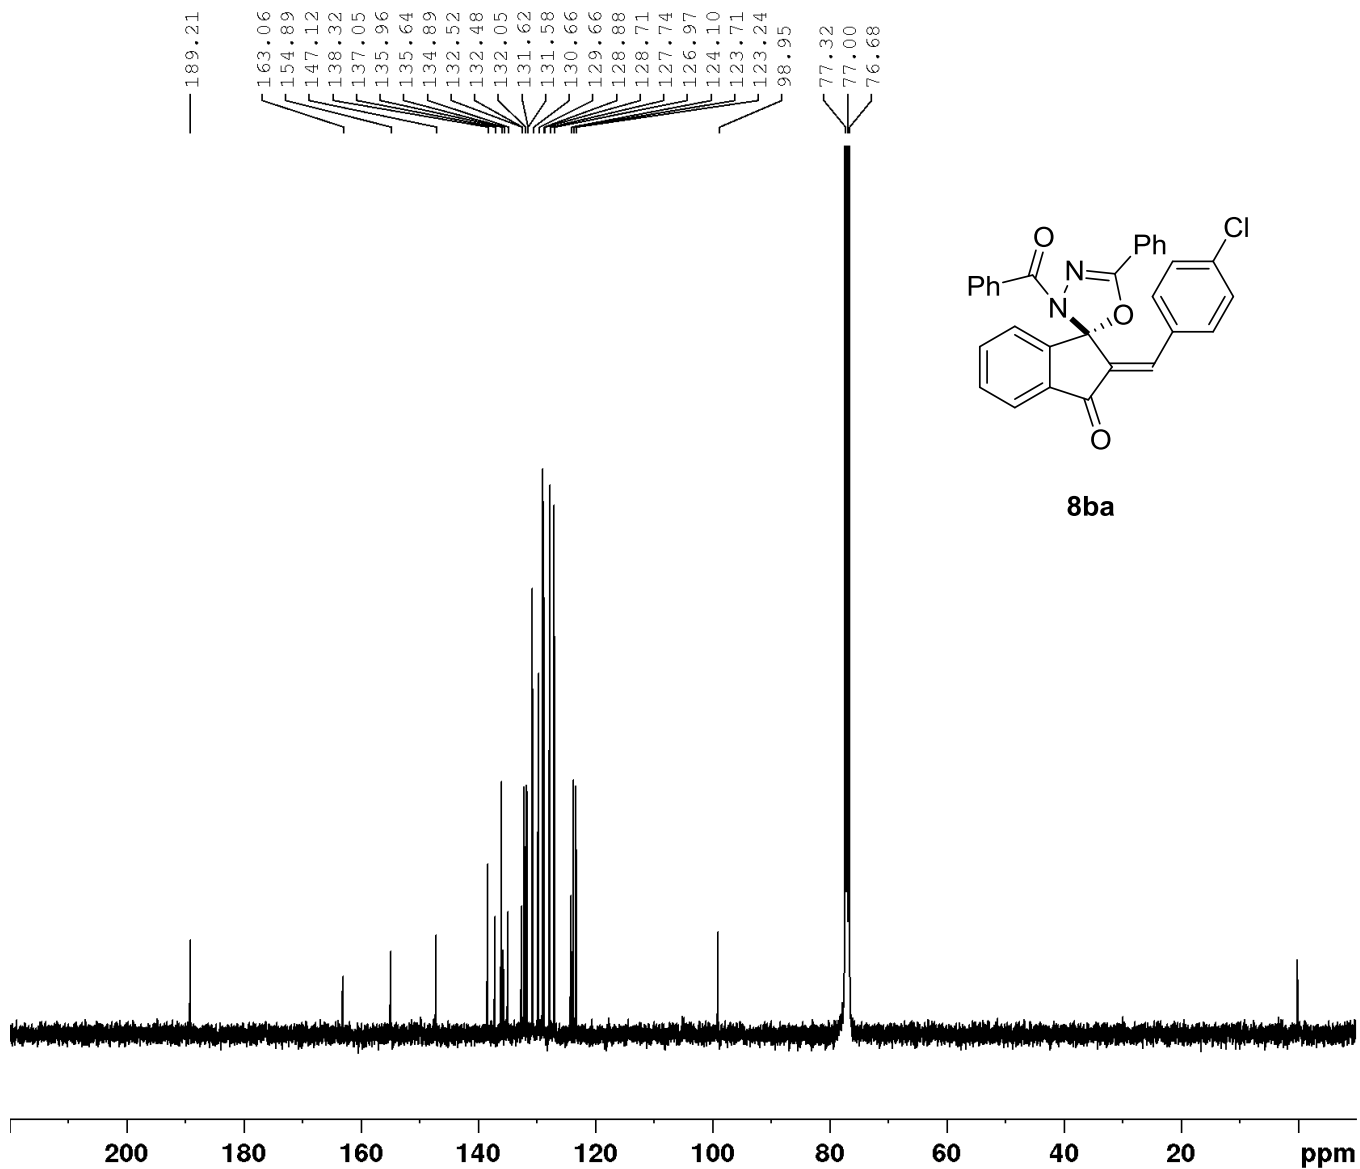

Current Data Parameters  
NAME SW 819  
EXPNO 5  
PROCNO 1

F2 - Acquisition Parameters  
Date\_ 20200523  
Time 21.11  
INSTRUM spect  
PROBHD 5 mm BBO BB-1H  
PULPROG zgpg30  
TD 32768  
SOLVENT CDCl3  
NS 18238  
DS 0  
SWH 24038.461 Hz  
FIDRES 0.733596 Hz  
AQ 0.6815744 sec  
RG 9195.2  
DW 20.800 usec  
DE 6.50 usec  
TE 295.8 K  
D1 2.00000000 sec  
D11 0.03000000 sec  
TD0 1

=====  
CHANNEL f1  
NUC1 13C  
P1 10.00 usec  
PL1 3.80 dB  
SFO1 100.6233325 MHz

=====  
CHANNEL f2  
CPDPRG[2] waltz16  
NUC2 1H  
PCPD2 90.00 usec  
PL2 10.20 dB  
PL12 26.00 dB  
PL13 29.00 dB  
SFO2 400.1316005 MHz

F2 - Processing parameters  
SI 32768  
SF 100.6127694 MHz  
WDW EM  
SSB 0  
LB 1.00 Hz  
GB 0  
PC 1.00

<sup>1</sup>H NMR Spectrum of 8ea (CDCl<sub>3</sub>, 400 MHz)

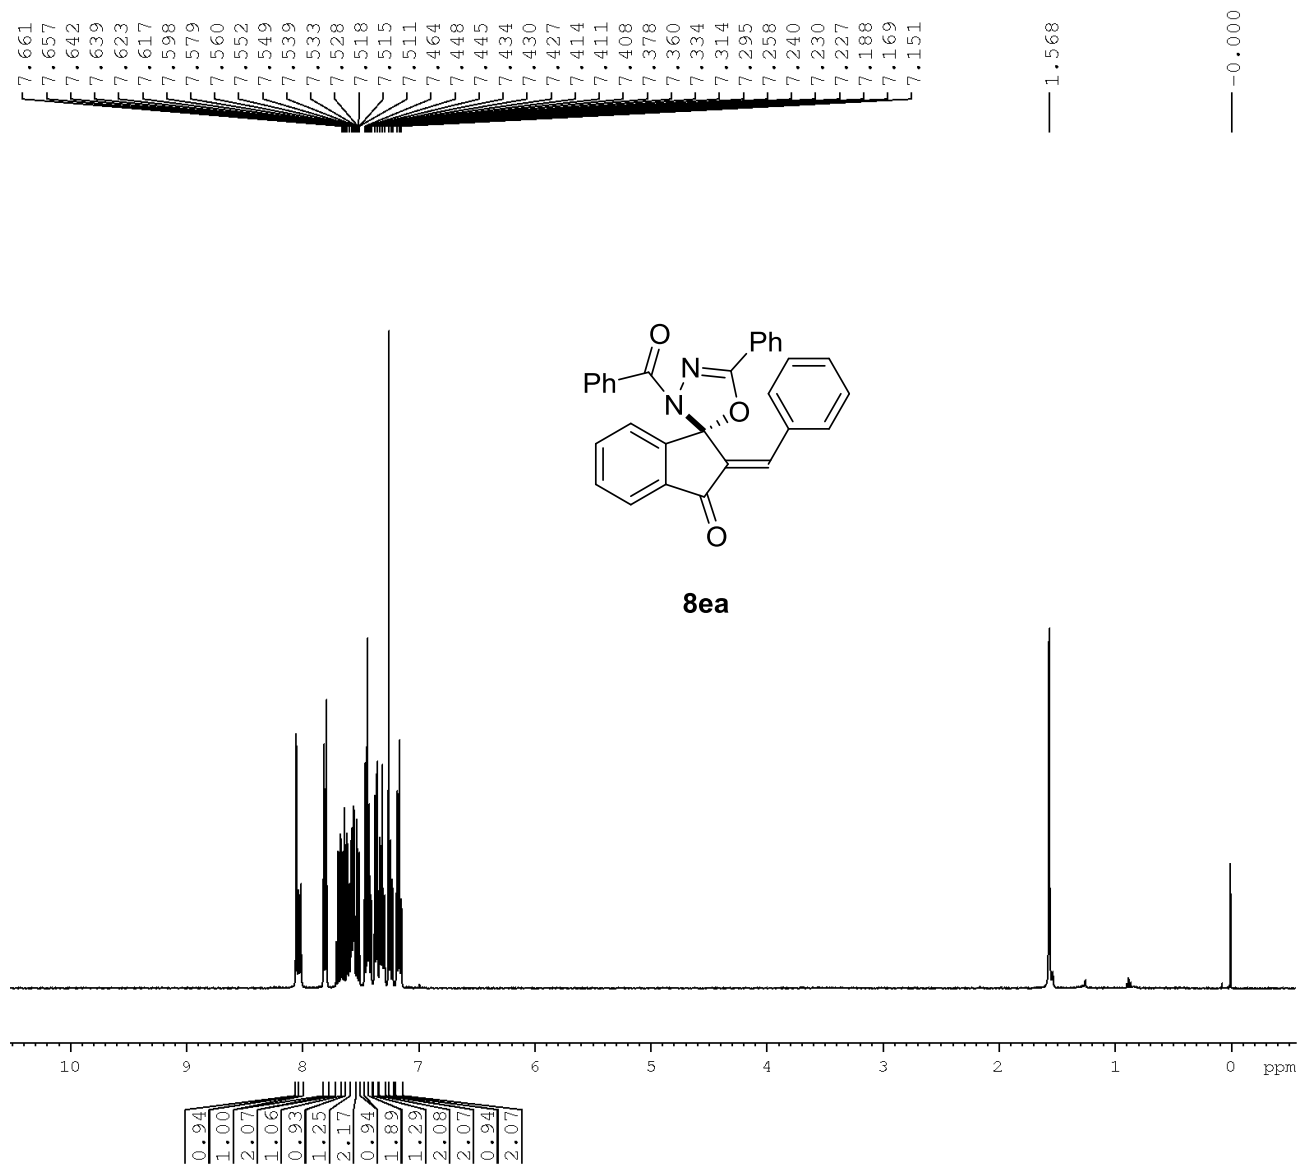

Current Data Parameters  
NAME SW 861-1  
EXPNO 2  
PROCNO 1

F2 - Acquisition Parameters  
Date\_ 20200510  
Time 21.50  
INSTRUM spect  
PROBHD 5 mm PABBO BB/  
PULPROG zg30  
TD 32768  
SOLVENT CDCl3  
NS 32  
DS 0  
SWH 7211.539 Hz  
FIDRES 0.220079 Hz  
AQ 2.2719147 sec  
RG 198.09  
DW 69.333 usec  
DE 10.06 usec  
TE 298.6 K  
D1 2.00000000 sec  
TDO 1

==== CHANNEL f1 =====  
SF01 400.1324008 MHz  
NUC1 1H  
P1 15.00 usec  
PLW1 11.39999962 W

F2 - Processing parameters  
SI 16384  
SF 400.1300104 MHz  
WDW EM  
SSB 0  
LB 0 Hz  
GB 0  
PC 1.00



<sup>13</sup>C NMR Spectrum of **8ea** (CDCl<sub>3</sub>, 100 MHz)

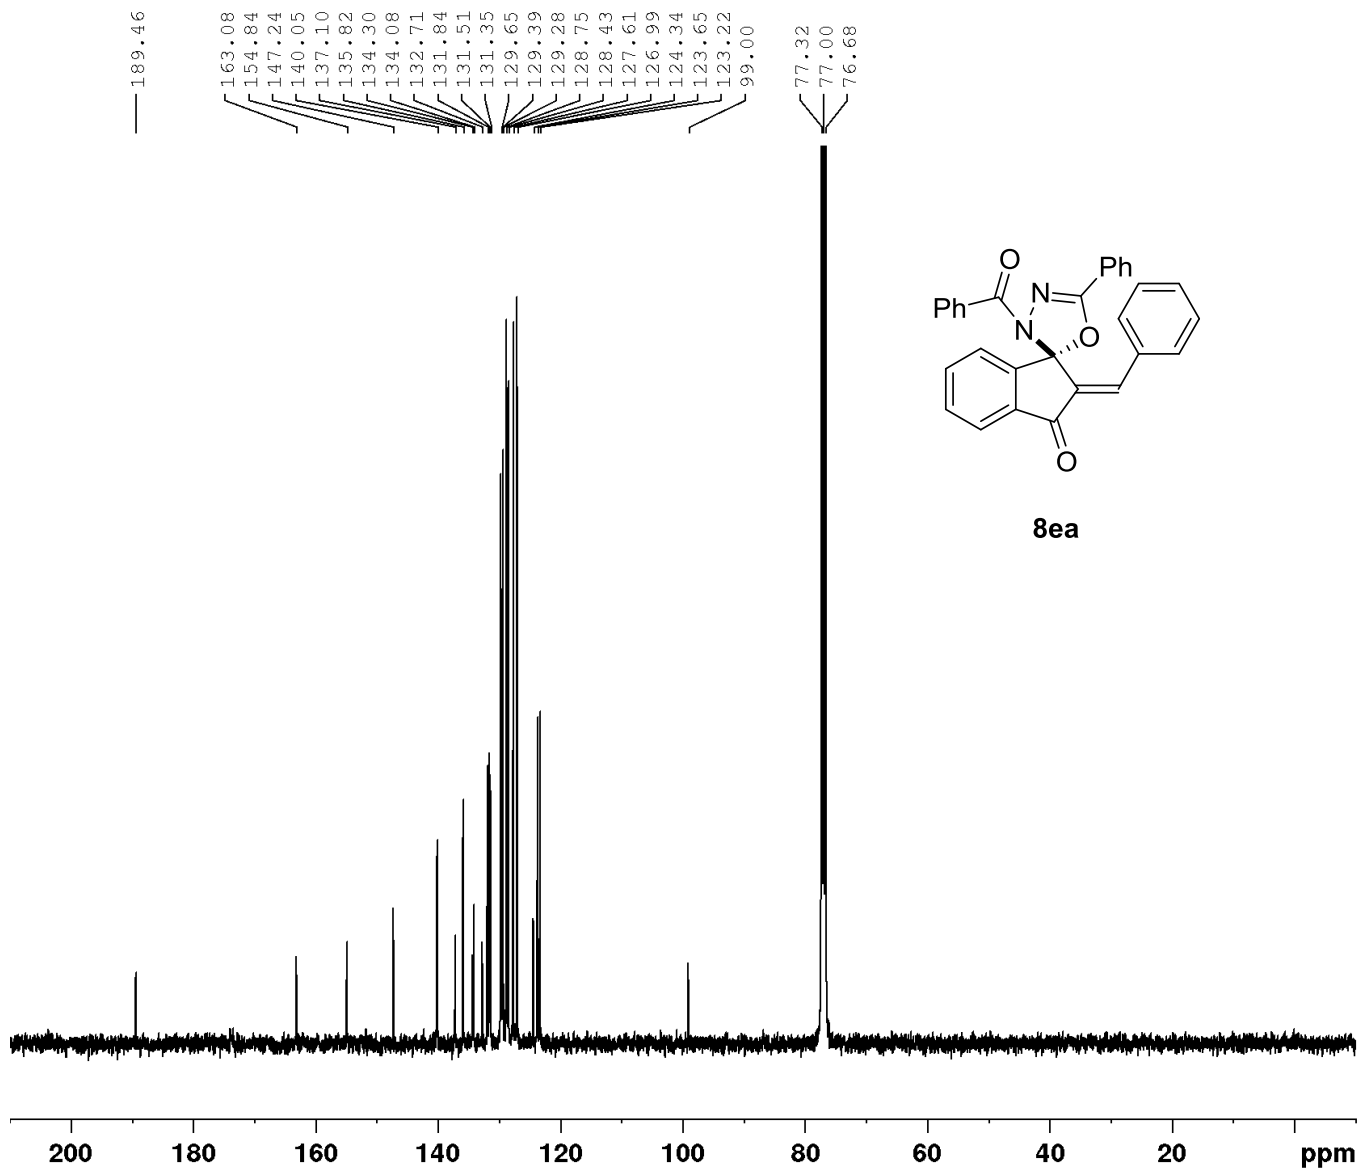

Current Data Parameters  
NAME SW 861-1  
EXPNO 3  
PROCNO 1

F2 - Acquisition Parameters  
Date\_ 20200510  
Time 21.53  
INSTRUM spect  
PROBHD 5 mm PABBO BB/  
PULPROG zgpg30  
TD 32768  
SOLVENT CDCl3  
NS 10000  
DS 0  
SWH 24038.461 Hz  
FIDRES 0.733596 Hz  
AQ 0.6815744 sec  
RG 198.09  
DW 20.800 usec  
DE 6.50 usec  
TE 298.6 K  
D1 2.00000000 sec  
D11 0.03000000 sec  
TD0 1

===== CHANNEL f1 =====  
SFO1 100.6228298 MHz  
NUC1 13C  
P1 10.00 usec  
PLW1 49.50000000 W

===== CHANNEL f2 =====  
SFO2 400.1316005 MHz  
NUC2 1H  
CPDPRG[2] waltz16  
PCPD2 90.00 usec  
PLW2 12.50000000 W  
PLW12 0.34722000 W  
PLW13 0.28125000 W

F2 - Processing parameters  
SI 32768  
SF 100.6127708 MHz  
WDW EM  
SSB 0  
LB 2.00 Hz  
GB 0  
PC 1.00

<sup>1</sup>H NMR Spectrum of **8ha** (CDCl<sub>3</sub>, 400 MHz)

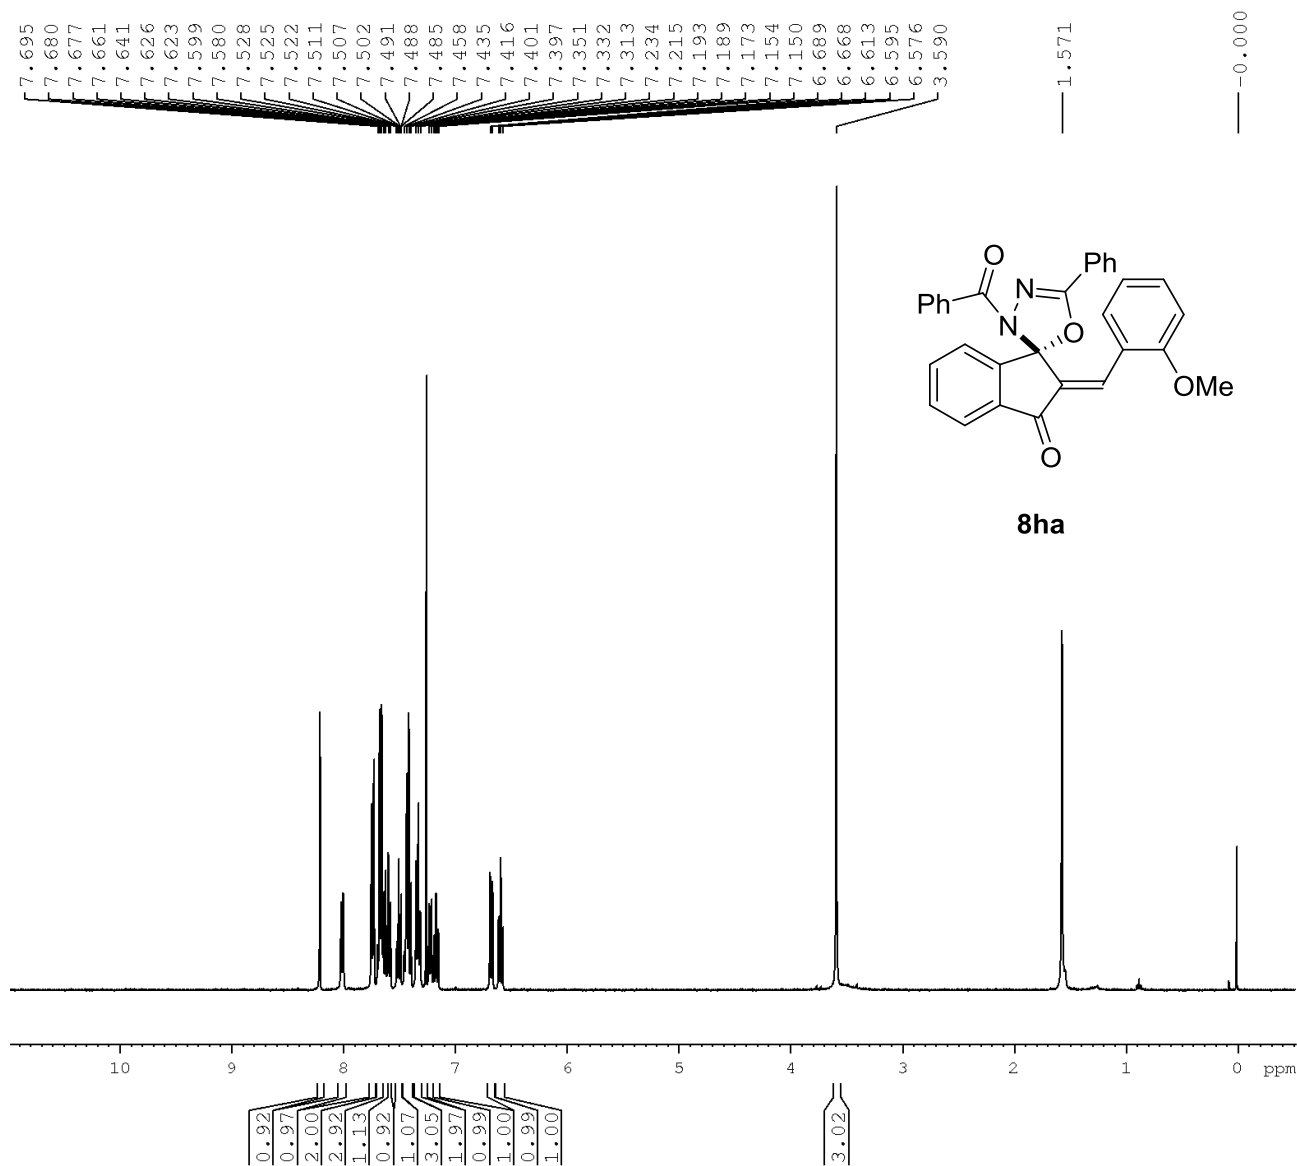

Current Data Parameters  
NAME SW 853  
EXPNO 3  
PROCNO 1

F2 - Acquisition Parameters  
Date\_ 20200509  
Time 0.36  
INSTRUM spect  
PROBHD 5 mm BBO BB-1H  
PULPROG zg30  
TD 32768  
SOLVENT CDCl3  
NS 32  
DS 0  
SWH 7246.377 Hz  
FIDRES 0.221142 Hz  
AQ 2.2609921 sec  
RG 322.5  
DW 69.000 usec  
DE 6.50 usec  
TE 296.9 K  
D1 2.0000000 sec  
TDO 1

==== CHANNEL f1 =====  
NUC1 1H  
P1 15.00 usec  
PL1 11.10 dB  
SFO1 400.1324008 MHz

F2 - Processing parameters  
SI 16384  
SF 400.1300110 MHz  
WDW EM  
SSB 0  
LB 0 Hz  
GB 0  
PC 1.00

<sup>13</sup>C NMR Spectrum of **8ha** (CDCl<sub>3</sub>, 100 MHz)

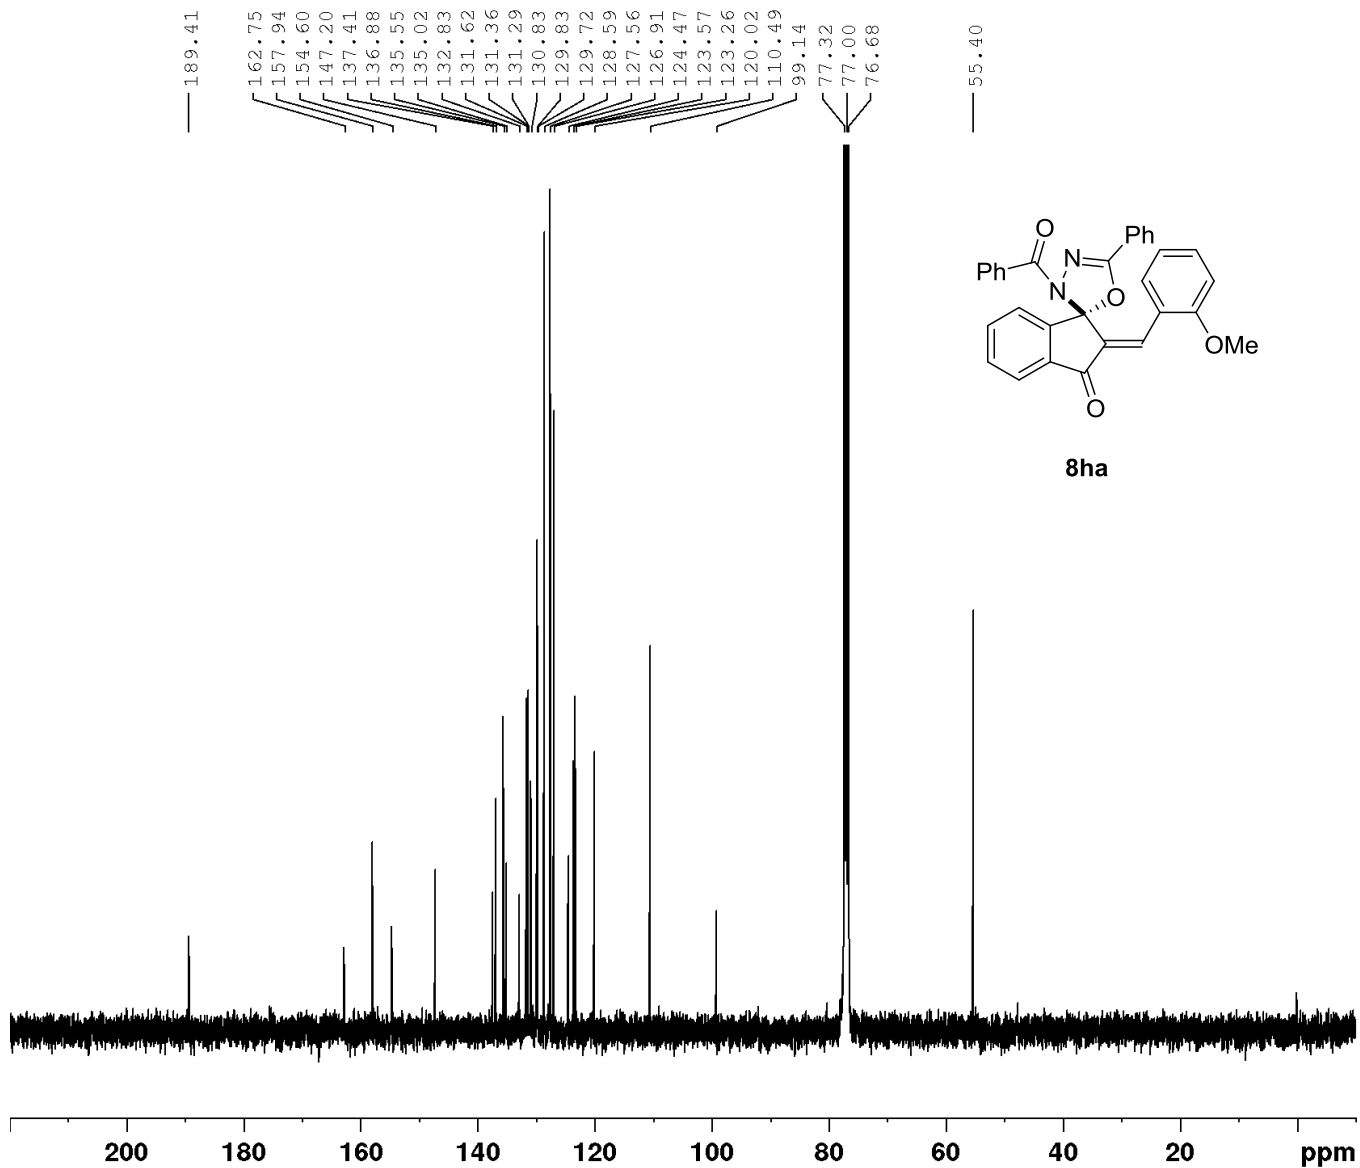

Current Data Parameters  
NAME SW 853  
EXPNO 4  
PROCNO 1

F2 - Acquisition Parameters  
Date\_ 20200509  
Time 0.39  
INSTRUM spect  
PROBHD 5 mm BBO BB-1H  
PULPROG zgpg30  
TD 32768  
SOLVENT CDCl3  
NS 9945  
DS 0  
SWH 24038.461 Hz  
FIDRES 0.733596 Hz  
AQ 0.6815744 sec  
RG 8192  
DW 20.800 usec  
DE 6.50 usec  
TE 296.8 K  
D1 2.00000000 sec  
D11 0.03000000 sec  
TD0 1

===== CHANNEL f1 =====  
NUC1 13C  
P1 10.00 usec  
PL1 3.80 dB  
SFO1 100.6233325 MHz

===== CHANNEL f2 =====  
CPDPRG[2] waltz16  
NUC2 1H  
PCPD2 90.00 usec  
PL2 10.20 dB  
PL12 26.00 dB  
PL13 29.00 dB  
SFO2 400.1316005 MHz

F2 - Processing parameters  
SI 32768  
SF 100.6127701 MHz  
WDW EM  
SSB 0  
LB 1.00 Hz  
GB 0  
PC 1.00

<sup>1</sup>H NMR Spectrum of **8ac** (CDCl<sub>3</sub>, 400 MHz)

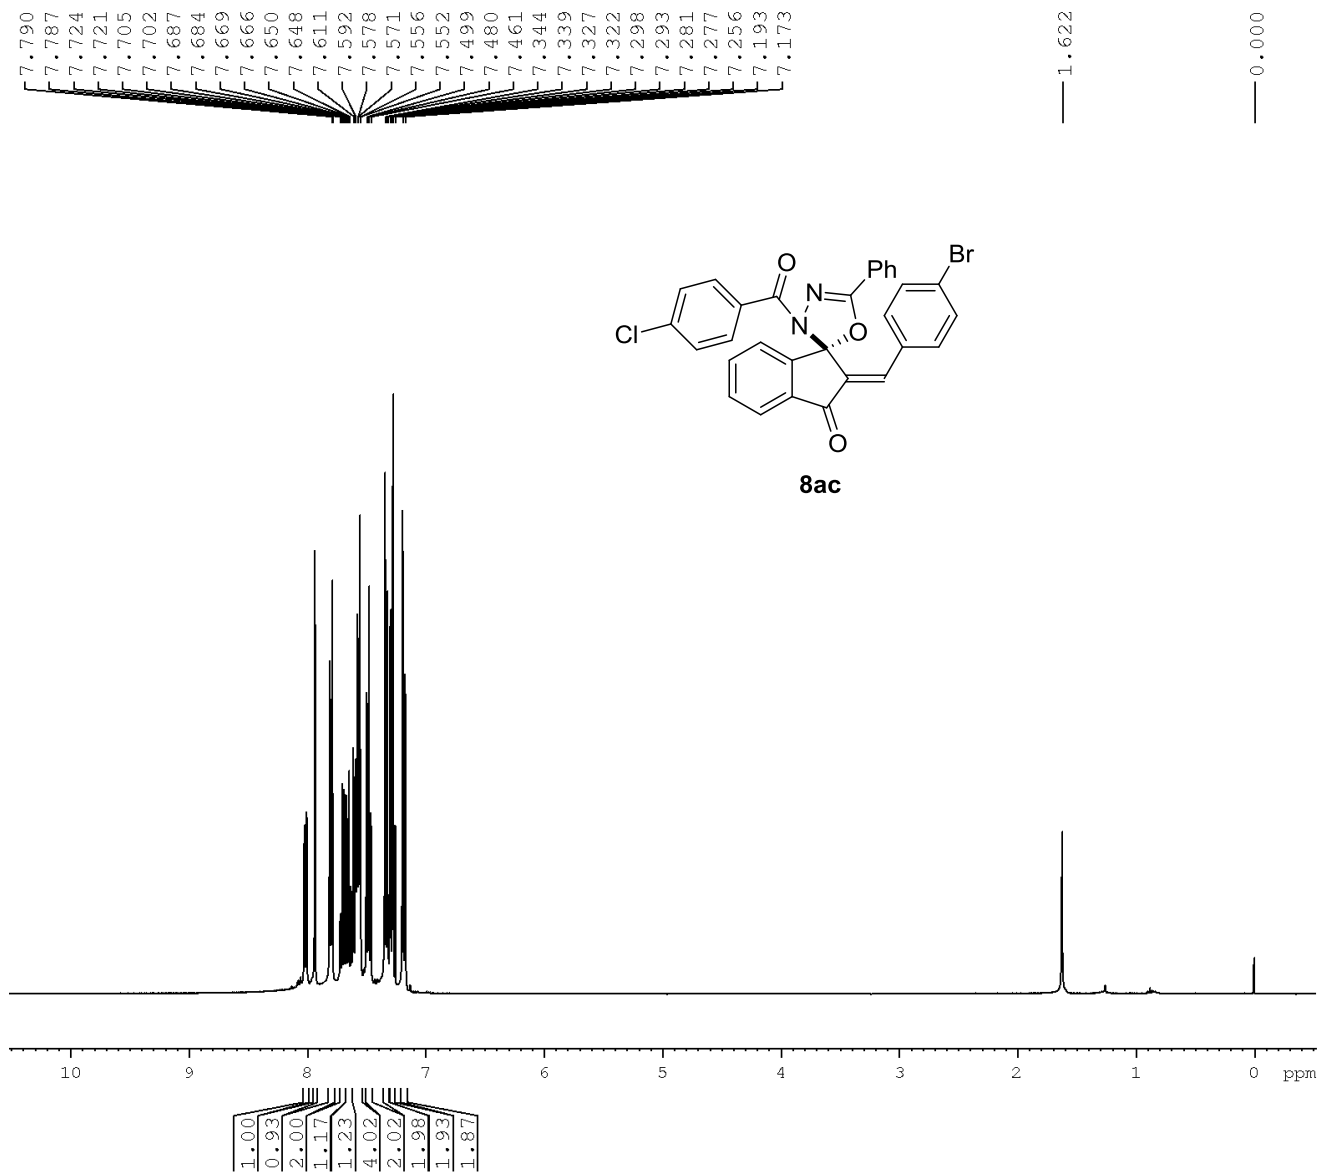

Current Data Parameters  
NAME SW 856-1  
EXPNO 2  
PROCNO 1

F2 - Acquisition Parameters  
Date\_ 20200509  
Time 18.08  
INSTRUM spect  
PROBHD 5 mm PABBO BB/  
PULPROG zg30  
TD 32768  
SOLVENT CDCl3  
NS 32  
DS 0  
SWH 7211.539 Hz  
FIDRES 0.220079 Hz  
AQ 2.2719147 sec  
RG 89.08  
DW 69.333 usec  
DE 10.06 usec  
TE 297.7 K  
D1 2.00000000 sec  
TD0 1

==== CHANNEL f1 =====  
SFO1 400.1324008 MHz  
NUC1 1H  
P1 15.00 usec  
PLW1 11.39999962 W

F2 - Processing parameters  
SI 16384  
SF 400.1300111 MHz  
WDW EM  
SSB 0  
LB 0 Hz  
GB 0  
PC 1.00

<sup>13</sup>C NMR Spectrum of **8ac** (CDCl<sub>3</sub>, 100 MHz)

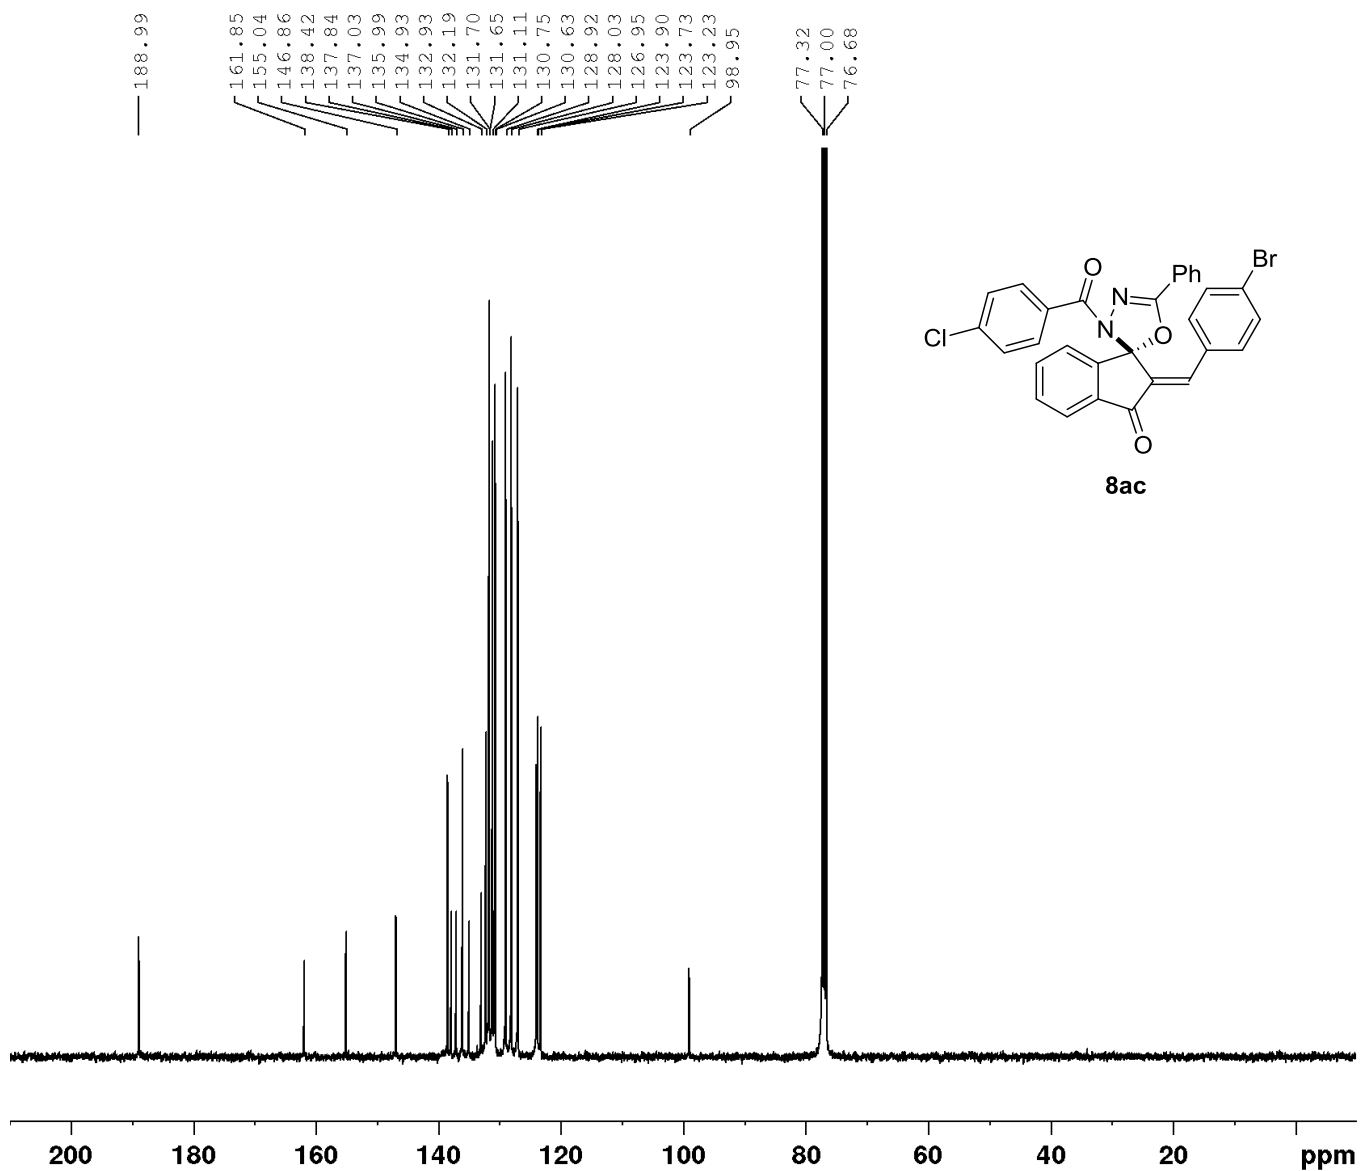

Current Data Parameters  
NAME SW 856-1  
EXPNO 3  
PROCNO 1

F2 - Acquisition Parameters  
Date\_ 20200509  
Time 18.11  
INSTRUM spect  
PROBHD 5 mm PABBO BB/  
PULPROG zgpg30  
TD 32768  
SOLVENT CDCl3  
NS 4222  
DS 0  
SWH 24038.461 Hz  
FIDRES 0.733596 Hz  
AQ 0.6815744 sec  
RG 198.09  
DW 20.800 usec  
DE 6.50 usec  
TE 297.9 K  
D1 2.00000000 sec  
D11 0.03000000 sec  
TD0 1

==== CHANNEL f1 =====  
SFO1 100.6228298 MHz  
NUC1 13C  
P1 10.00 usec  
PLW1 49.50000000 W

==== CHANNEL f2 =====  
SFO2 400.1316005 MHz  
NUC2 1H  
CPDPRG[2] waltz16  
PCPD2 90.00 usec  
PLW2 12.50000000 W  
PLW12 0.34722000 W  
PLW13 0.28125000 W

F2 - Processing parameters  
SI 32768  
SF 100.6127727 MHz  
WDW EM  
SSB 0  
LB 2.00 Hz  
GB 0  
PC 1.00

<sup>1</sup>H NMR Spectrum of 8al (CDCl<sub>3</sub>, 400 MHz)

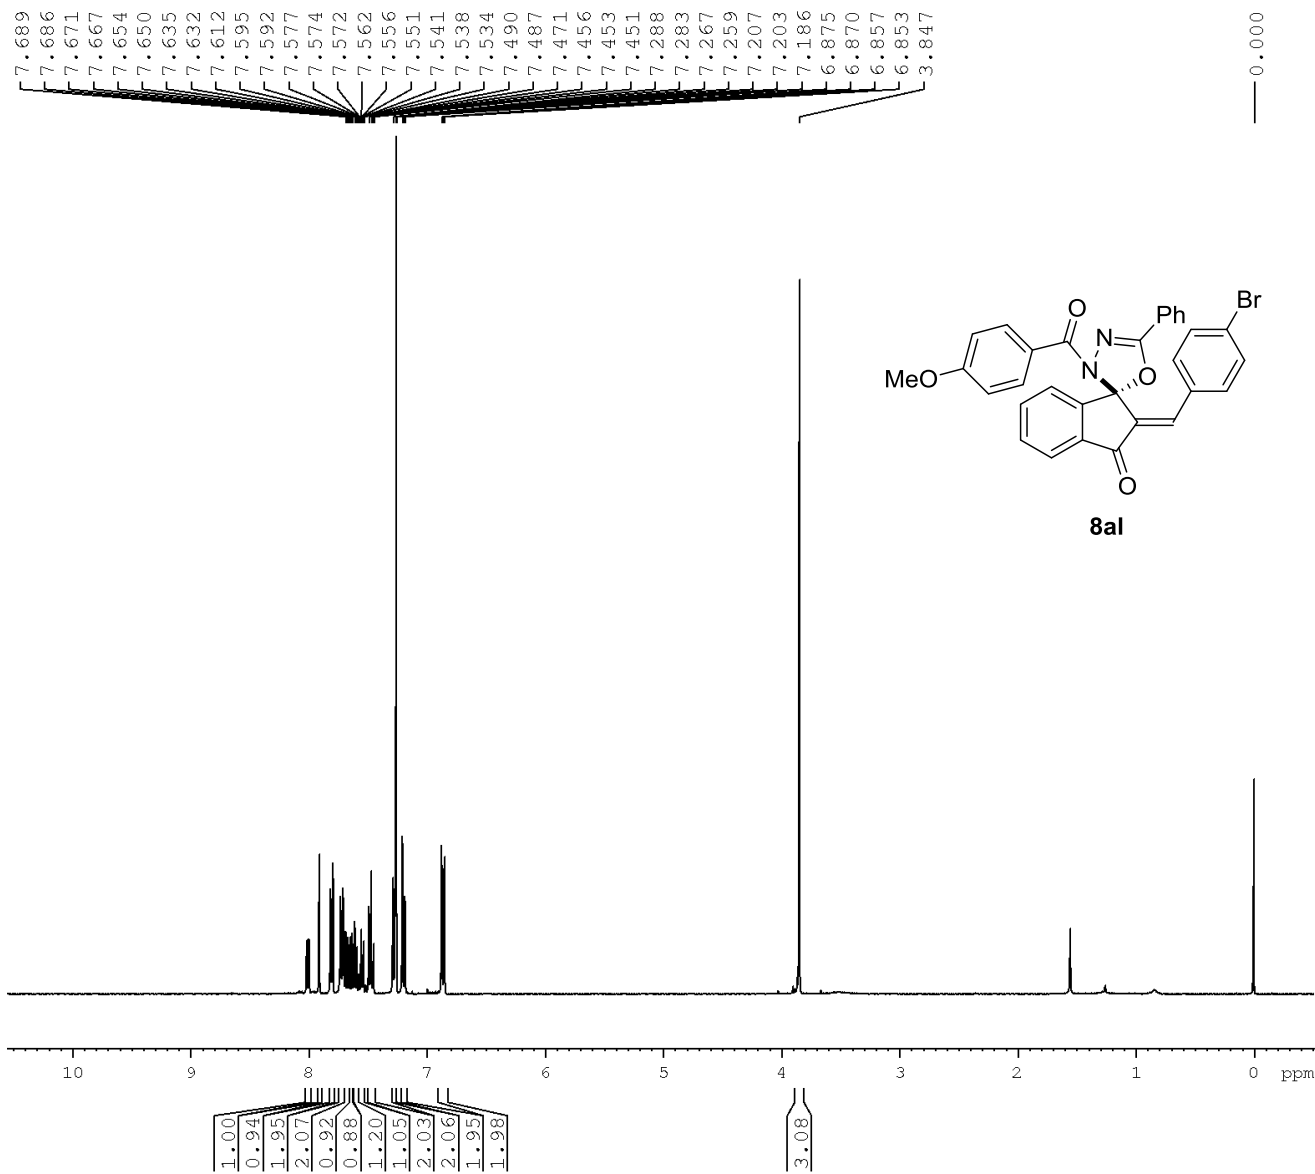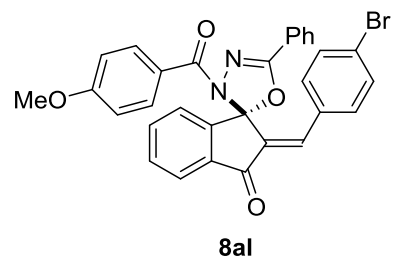

Current Data Parameters  
NAME SW 831  
EXPNO 9  
PROCNO 1

F2 - Acquisition Parameters  
Date\_ 20200524  
Time 19.48  
INSTRUM spect  
PROBHD 5 mm BBO BB-1H  
PULPROG zg30  
TD 32768  
SOLVENT CDCl3  
NS 32  
DS 0  
SWH 7246.377 Hz  
FIDRES 0.221142 Hz  
AQ 2.2609921 sec  
RG 322.5  
DW 69.000 usec  
DE 6.50 usec  
TE 297.3 K  
D1 2.00000000 sec  
TD0 1

==== CHANNEL f1 =====  
NUC1 1H  
P1 15.00 usec  
PL1 11.10 dB  
SFO1 400.1324008 MHz

F2 - Processing parameters  
SI 16384  
SF 400.1300113 MHz  
WDW EM  
SSB 0  
LB 0 Hz  
GB 0  
PC 1.00

<sup>13</sup>C NMR Spectrum of **8al** (CDCl<sub>3</sub>, 100 MHz)

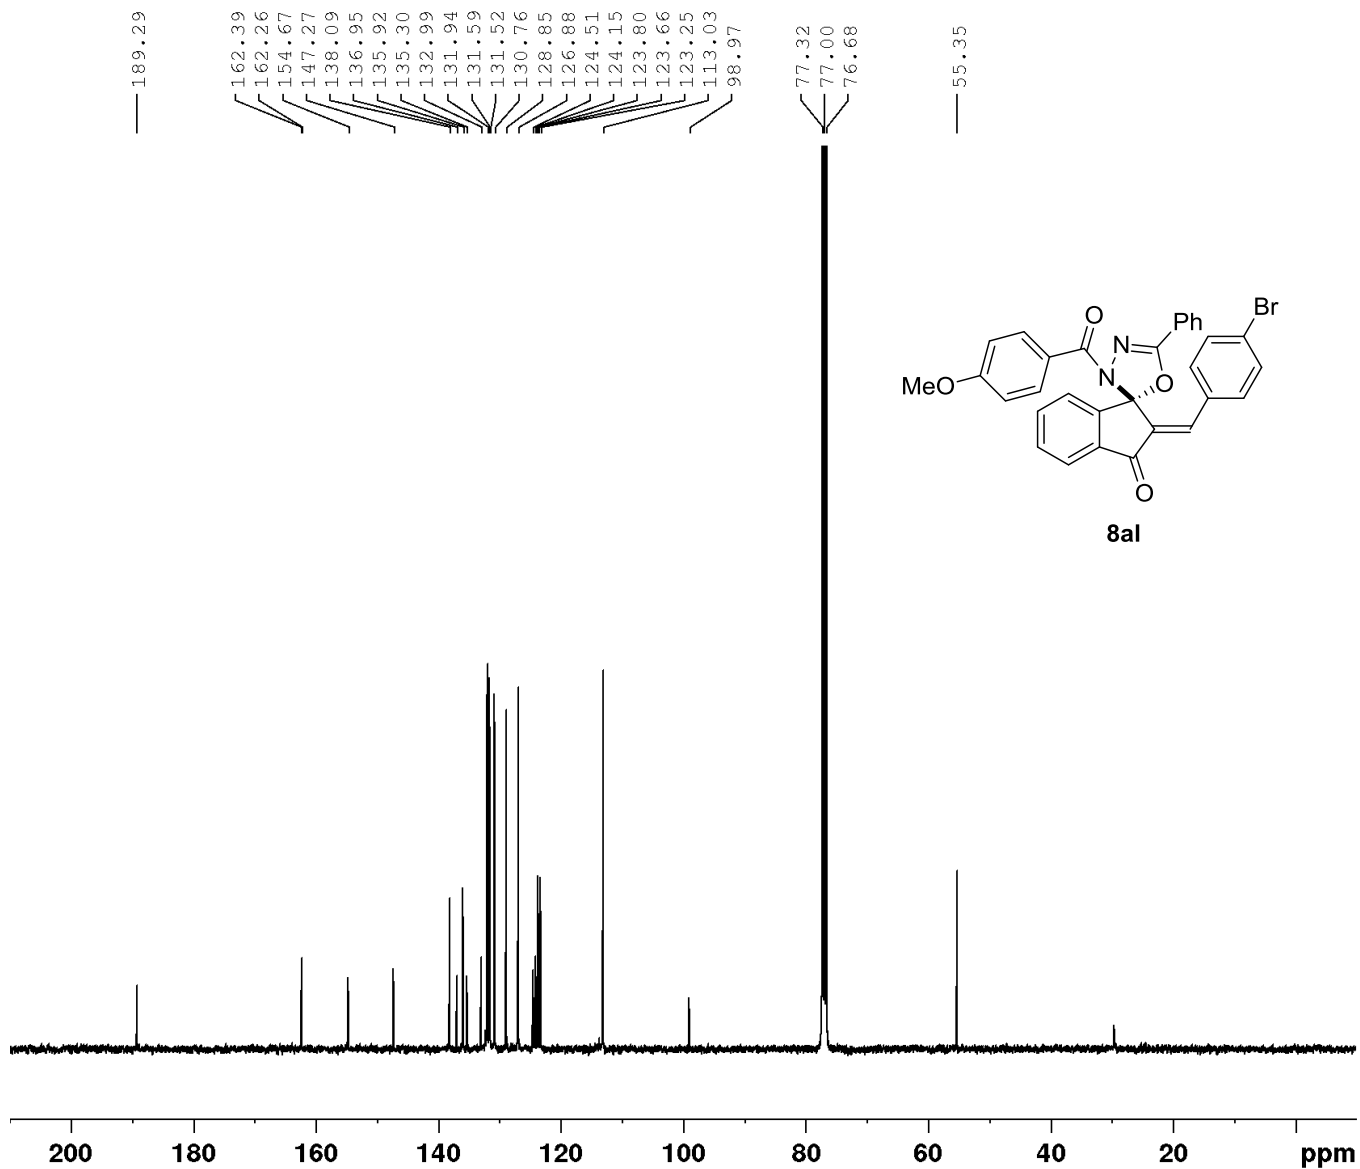

Current Data Parameters  
NAME SW 831-1  
EXPNO 2  
PROCNO 1

F2 - Acquisition Parameters  
Date\_ 20200425  
Time 0.36  
INSTRUM spect  
PROBHD 5 mm PABBO BB/  
PULPROG zgpg30  
TD 32768  
SOLVENT CDCl3  
NS 5000  
DS 0  
SWH 24038.461 Hz  
FIDRES 0.733596 Hz  
AQ 0.6815744 sec  
RG 198.09  
DW 20.800 usec  
DE 6.50 usec  
TE 294.2 K  
D1 2.00000000 sec  
D11 0.03000000 sec  
TD0 1

==== CHANNEL f1 =====  
SFO1 100.6228298 MHz  
NUC1 13C  
P1 10.00 usec  
PLW1 49.50000000 W

==== CHANNEL f2 =====  
SFO2 400.1316005 MHz  
NUC2 1H  
CPDPRG[2] waltz16  
PCPD2 90.00 usec  
PLW2 12.50000000 W  
PLW12 0.34722000 W  
PLW13 0.28125000 W

F2 - Processing parameters  
SI 32768  
SF 100.6127720 MHz  
WDW EM  
SSB 0  
LB 2.00 Hz  
GB 0  
PC 1.00

<sup>1</sup>H NMR Spectrum of 8ai (CDCl<sub>3</sub>, 400 MHz)

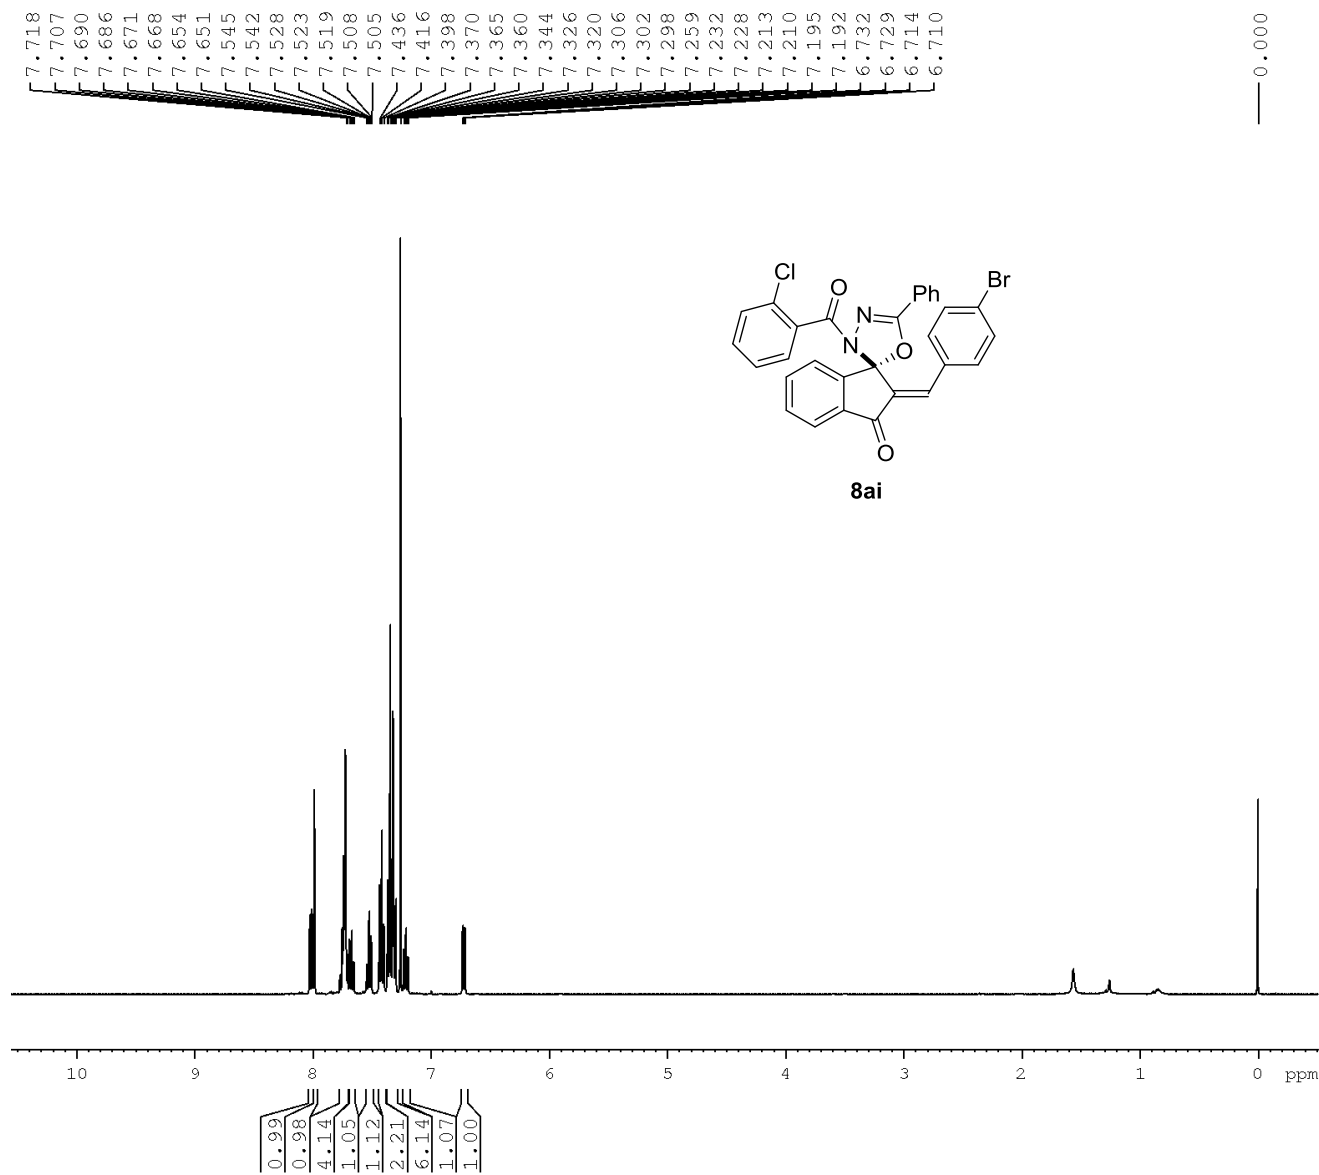



<sup>13</sup>C NMR Spectrum of **8ai** (CDCl<sub>3</sub>, 100 MHz)

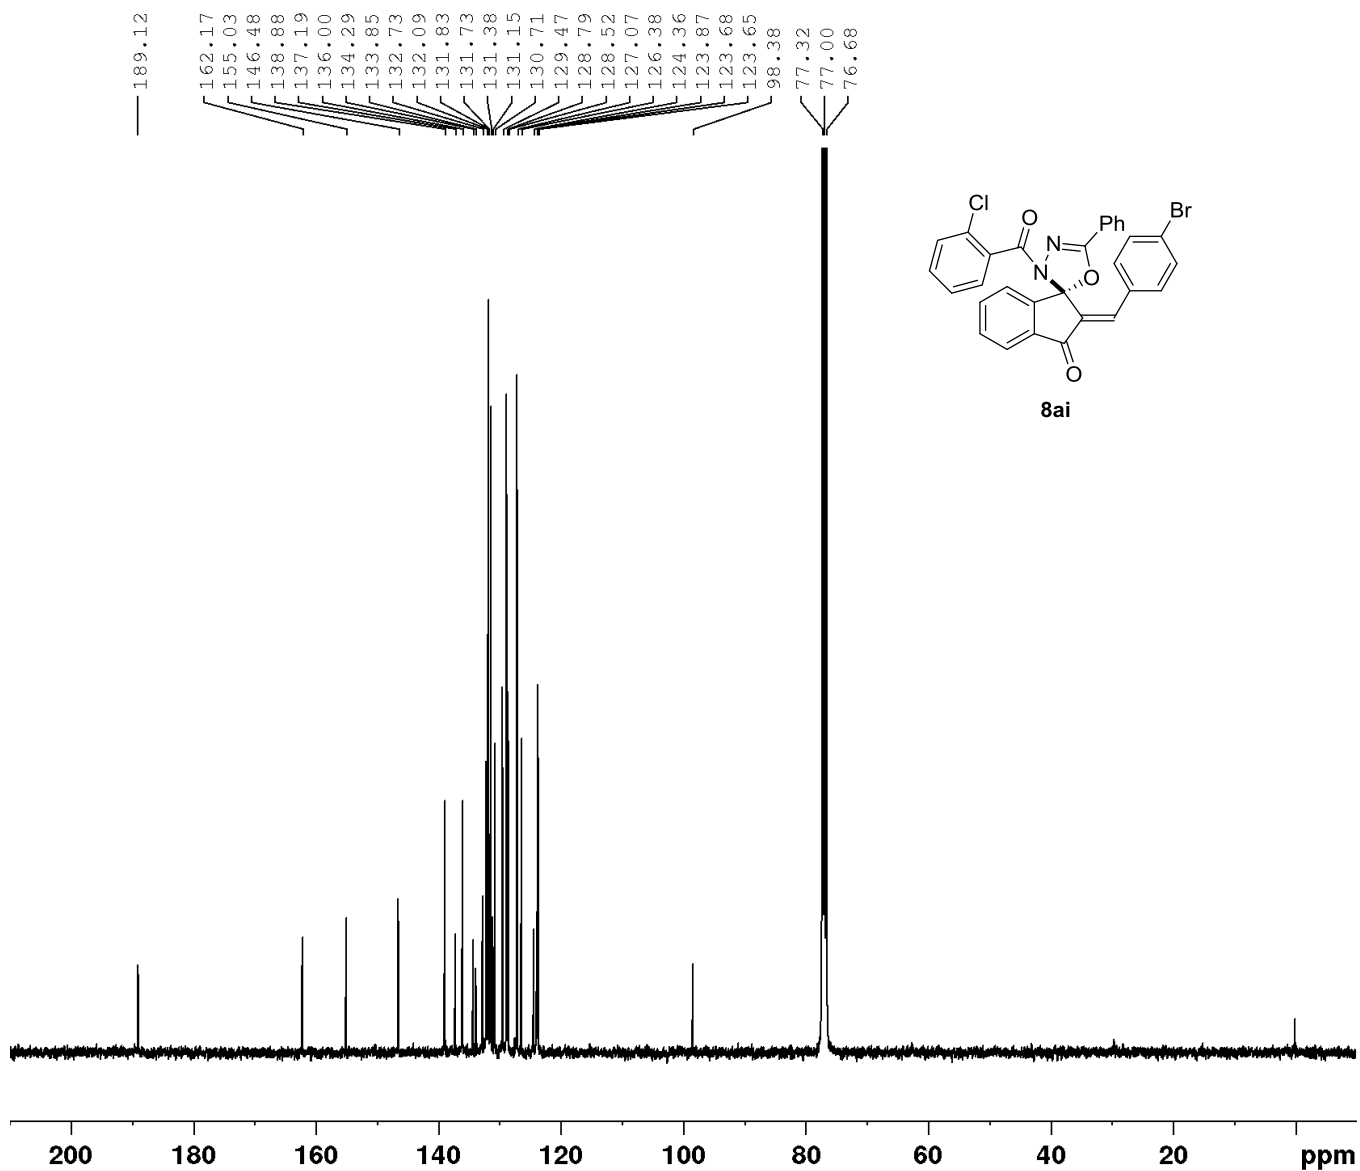

Current Data Parameters  
NAME SW 832-1  
EXPNO 4  
PROCNO 1

F2 - Acquisition Parameters  
Date\_ 20200520  
Time 23.56  
INSTRUM spect  
PROBHD 5 mm PABBO BB/  
PULPROG zgpg30  
TD 32768  
SOLVENT CDCl3  
NS 13073  
DS 0  
SWH 24038.461 Hz  
FIDRES 0.733596 Hz  
AQ 0.6815744 sec  
RG 198.09  
DW 20.800 usec  
DE 6.50 usec  
TE 296.8 K  
D1 2.00000000 sec  
D11 0.03000000 sec  
TD0 1

===== CHANNEL f1 =====  
SFO1 100.6228298 MHz  
NUC1 13C  
P1 10.00 usec  
PLW1 49.50000000 W

===== CHANNEL f2 =====  
SFO2 400.1316005 MHz  
NUC2 1H  
CPDPRG[2] waltz16  
PCPD2 90.00 usec  
PLW2 12.50000000 W  
PLW12 0.34722000 W  
PLW13 0.28125000 W

F2 - Processing parameters  
SI 32768  
SF 100.6127707 MHz  
WDW EM  
SSB 0  
LB 2.00 Hz  
GB 0  
PC 1.00

<sup>1</sup>H NMR Spectrum of **8am** (CDCl<sub>3</sub>, 400 MHz)

8.014  
7.996  
7.984  
7.975  
7.923  
7.834  
7.816  
7.708  
7.690  
7.672  
7.653  
7.636  
7.634  
7.621  
7.604  
7.591  
7.572  
7.553  
7.508  
7.489  
7.470  
7.255  
7.199  
7.178  
7.118  
7.097  
7.086  
7.074

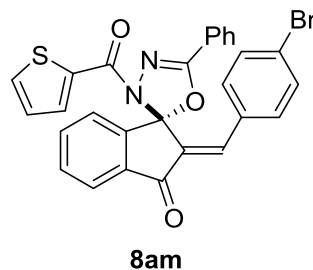

-0.000

Current Data Parameters  
NAME SW 862  
EXPNO 1  
PROCNO 1

F2 - Acquisition Parameters  
Date\_ 20200517  
Time 22.38  
INSTRUM spect  
PROBHD 5 mm BBO BB-1H  
PULPROG zg30  
TD 32768  
SOLVENT CDCl3  
NS 32  
DS 0  
SWH 7246.377 Hz  
FIDRES 0.221142 Hz  
AQ 2.2609921 sec  
RG 114  
DW 69.000 usec  
DE 6.50 usec  
TE 296.4 K  
D1 2.00000000 sec  
TDO 1

==== CHANNEL f1 =====  
NUC1 1H  
P1 15.00 usec  
PL1 11.10 dB  
SFO1 400.1324008 MHz

F2 - Processing parameters  
SI 16384  
SF 400.1300134 MHz  
WDW EM  
SSB 0  
LB 0 Hz  
GB 0  
PC 1.00

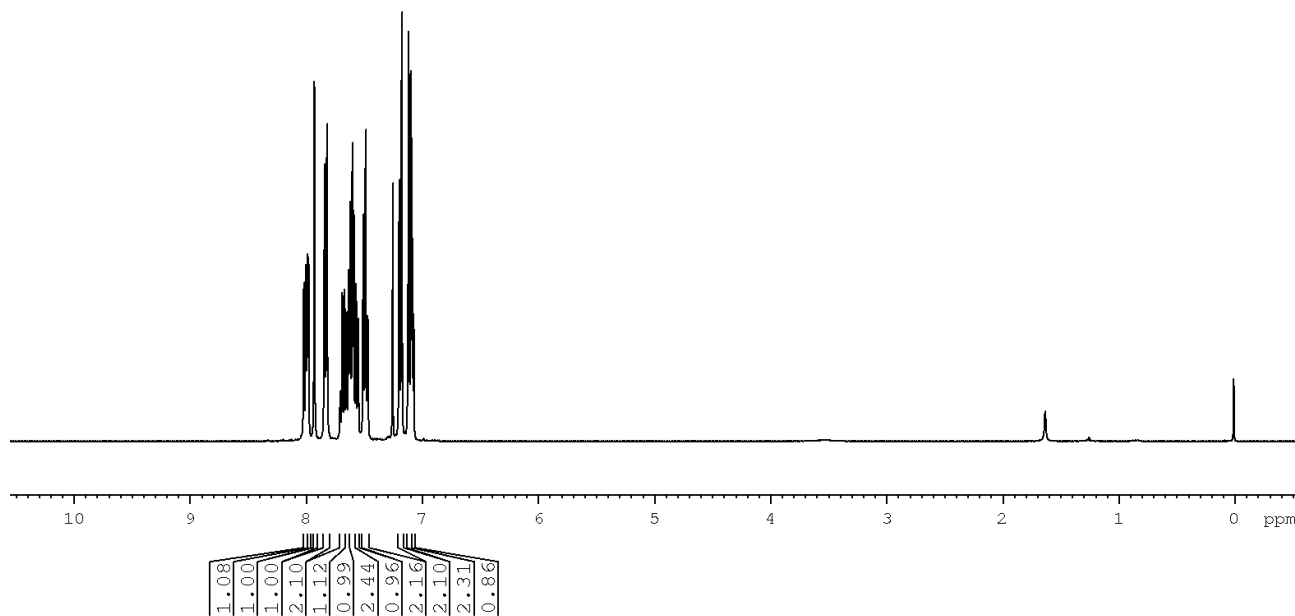

<sup>13</sup>C NMR Spectrum of **8am** (CDCl<sub>3</sub>, 100 MHz)

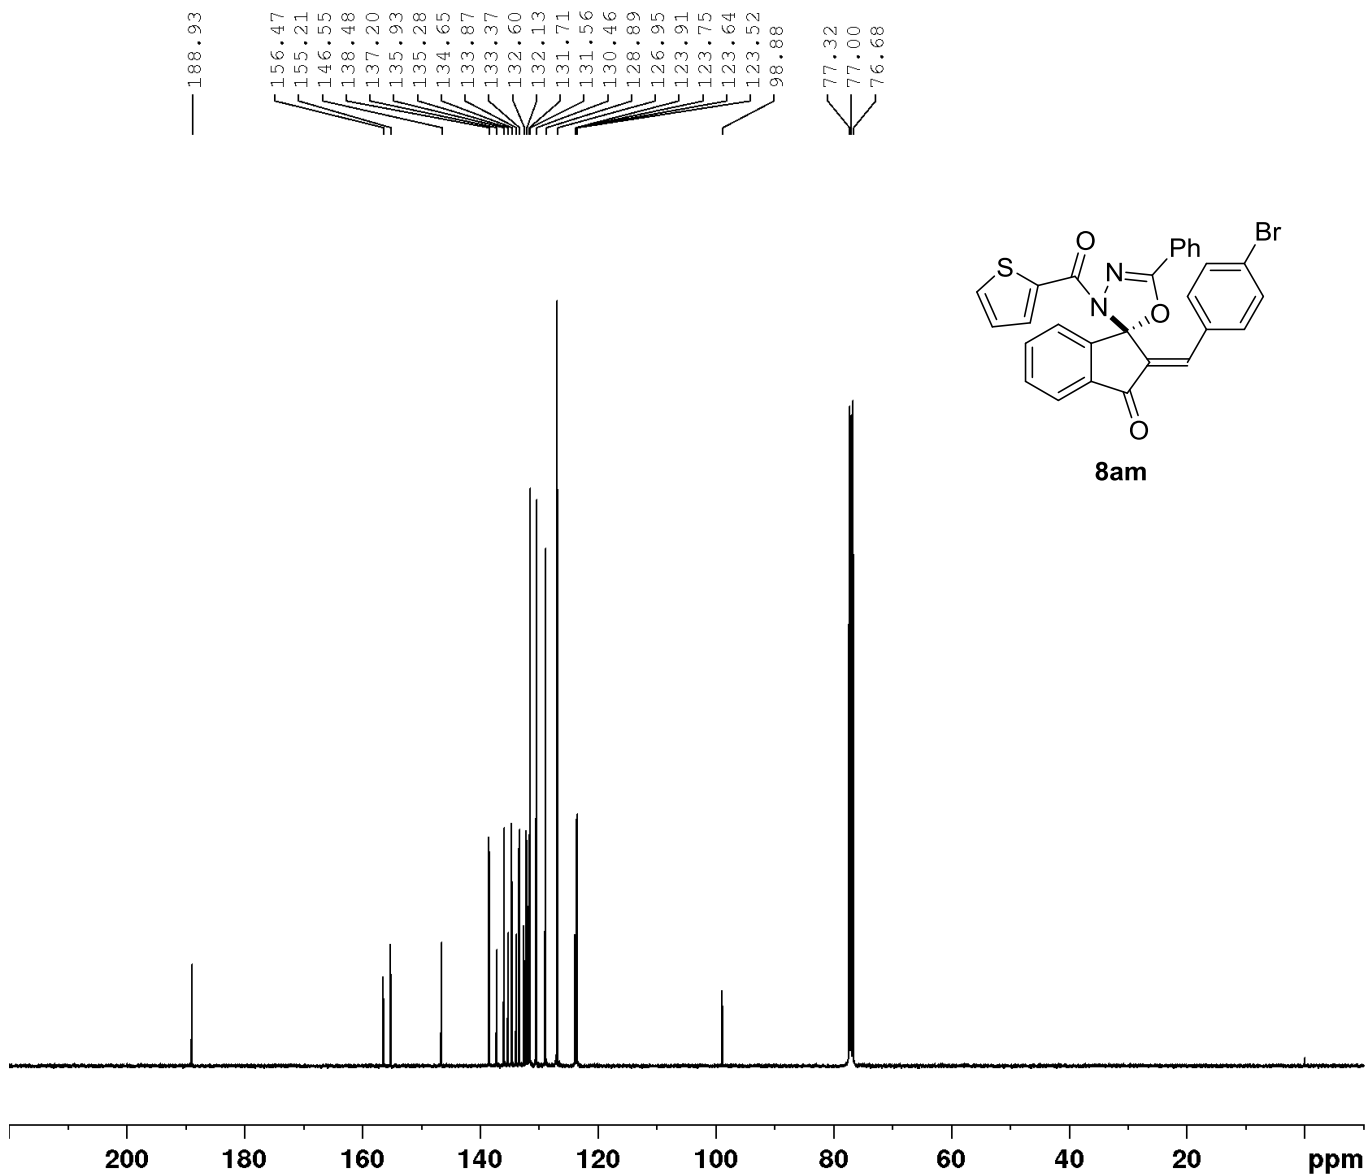

Current Data Parameters  
NAME SW 862  
EXPNO 2  
PROCNO 1

F2 - Acquisition Parameters  
Date\_ 20200517  
Time 22.43  
INSTRUM spect  
PROBHD 5 mm BBO BB-1H  
PULPROG zgpg30  
TD 32768  
SOLVENT CDCl3  
NS 12000  
DS 0  
SWH 24038.461 Hz  
FIDRES 0.733596 Hz  
AQ 0.6815744 sec  
RG 8192  
DW 20.800 usec  
DE 6.50 usec  
TE 296.4 K  
D1 2.00000000 sec  
D11 0.03000000 sec  
TD0 1

==== CHANNEL f1 =====  
NUC1 13C  
P1 10.00 usec  
PL1 3.80 dB  
SFO1 100.6233325 MHz

==== CHANNEL f2 =====  
CPDPRG[2] waltz16  
NUC2 1H  
PCPD2 90.00 usec  
PL2 10.20 dB  
PL12 26.00 dB  
PL13 29.00 dB  
SFO2 400.1316005 MHz

F2 - Processing parameters  
SI 32768  
SF 100.6127735 MHz  
WDW EM  
SSB 0  
LB 1.00 Hz  
GB 0  
PC 1.00

<sup>1</sup>H NMR Spectrum of **8ak** (CDCl<sub>3</sub>, 400 MHz)

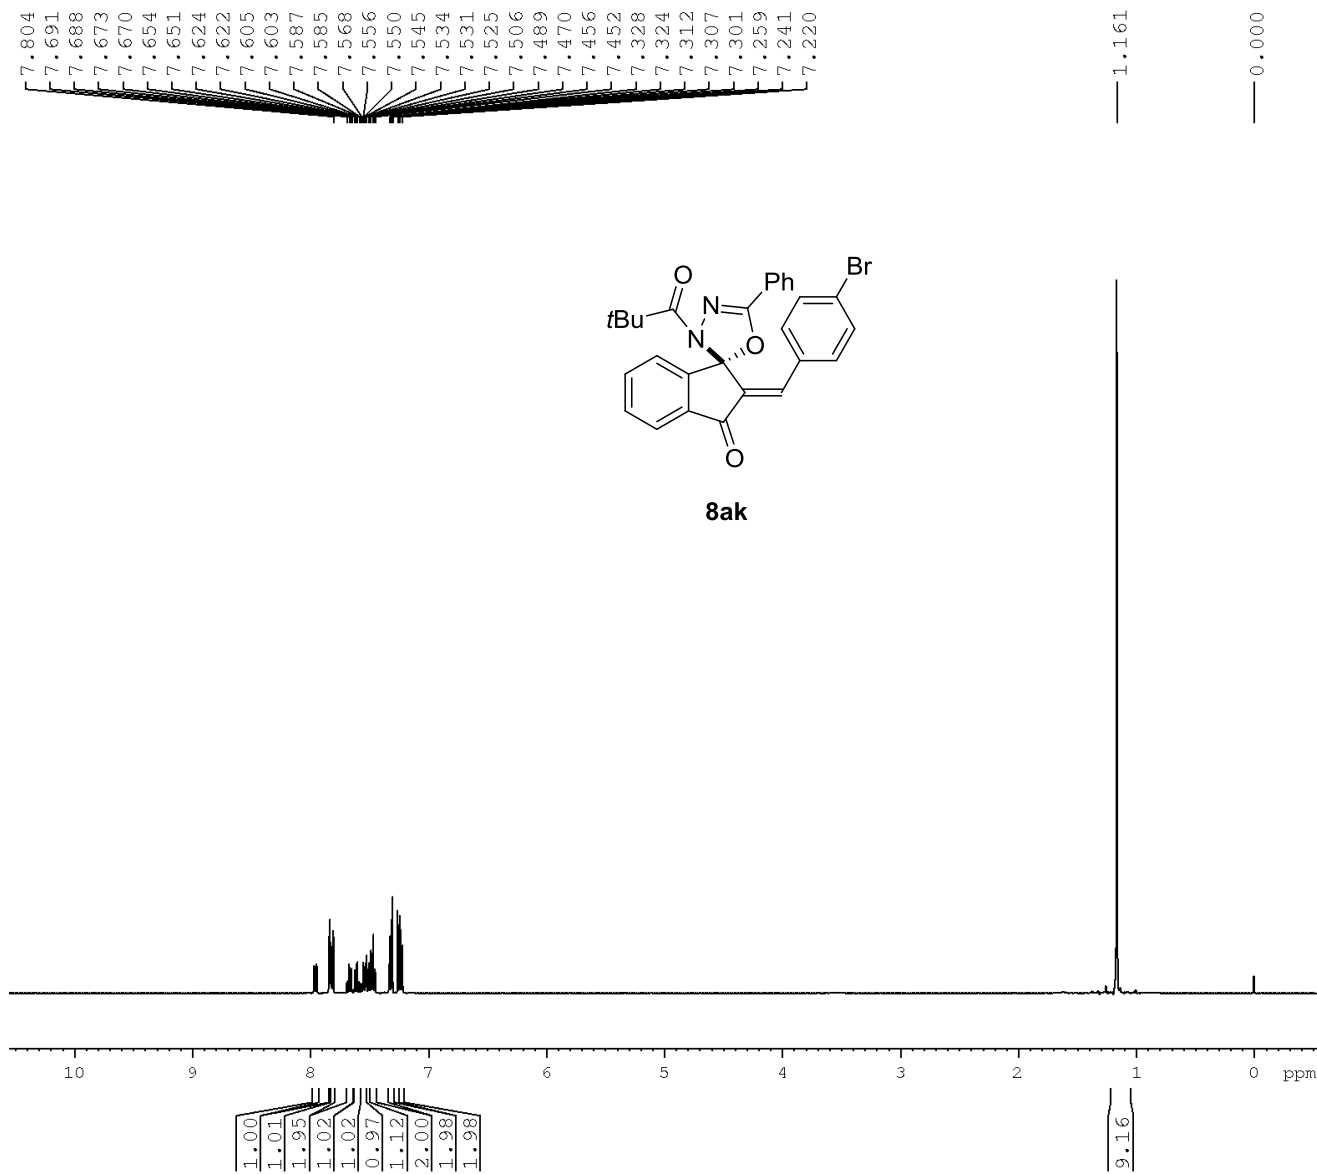

Current Data Parameters

NAME SW 836  
EXPNO 5  
PROCNO 1

F2 - Acquisition Parameters

Date\_ 20200524  
Time 20.02  
INSTRUM spect  
PROBHD 5 mm BBO BB-1H  
PULPROG zg30  
TD 32768  
SOLVENT CDCl3  
NS 1  
DS 0  
SWH 7246.377 Hz  
FIDRES 0.221142 Hz  
AQ 2.2609921 sec  
RG 114  
DW 69.000 usec  
DE 6.50 usec  
TE 296.7 K  
D1 2.00000000 sec  
TD0 1

==== CHANNEL f1 =====

NUC1 1H  
P1 15.00 usec  
PL1 11.10 dB  
SFO1 400.1324008 MHz

F2 - Processing parameters

SI 16384  
SF 400.1300116 MHz  
WDW EM  
SSB 0  
LB 0 Hz  
GB 0  
PC 1.00

<sup>13</sup>C NMR Spectrum of **8ak** (CDCl<sub>3</sub>, 100 MHz)

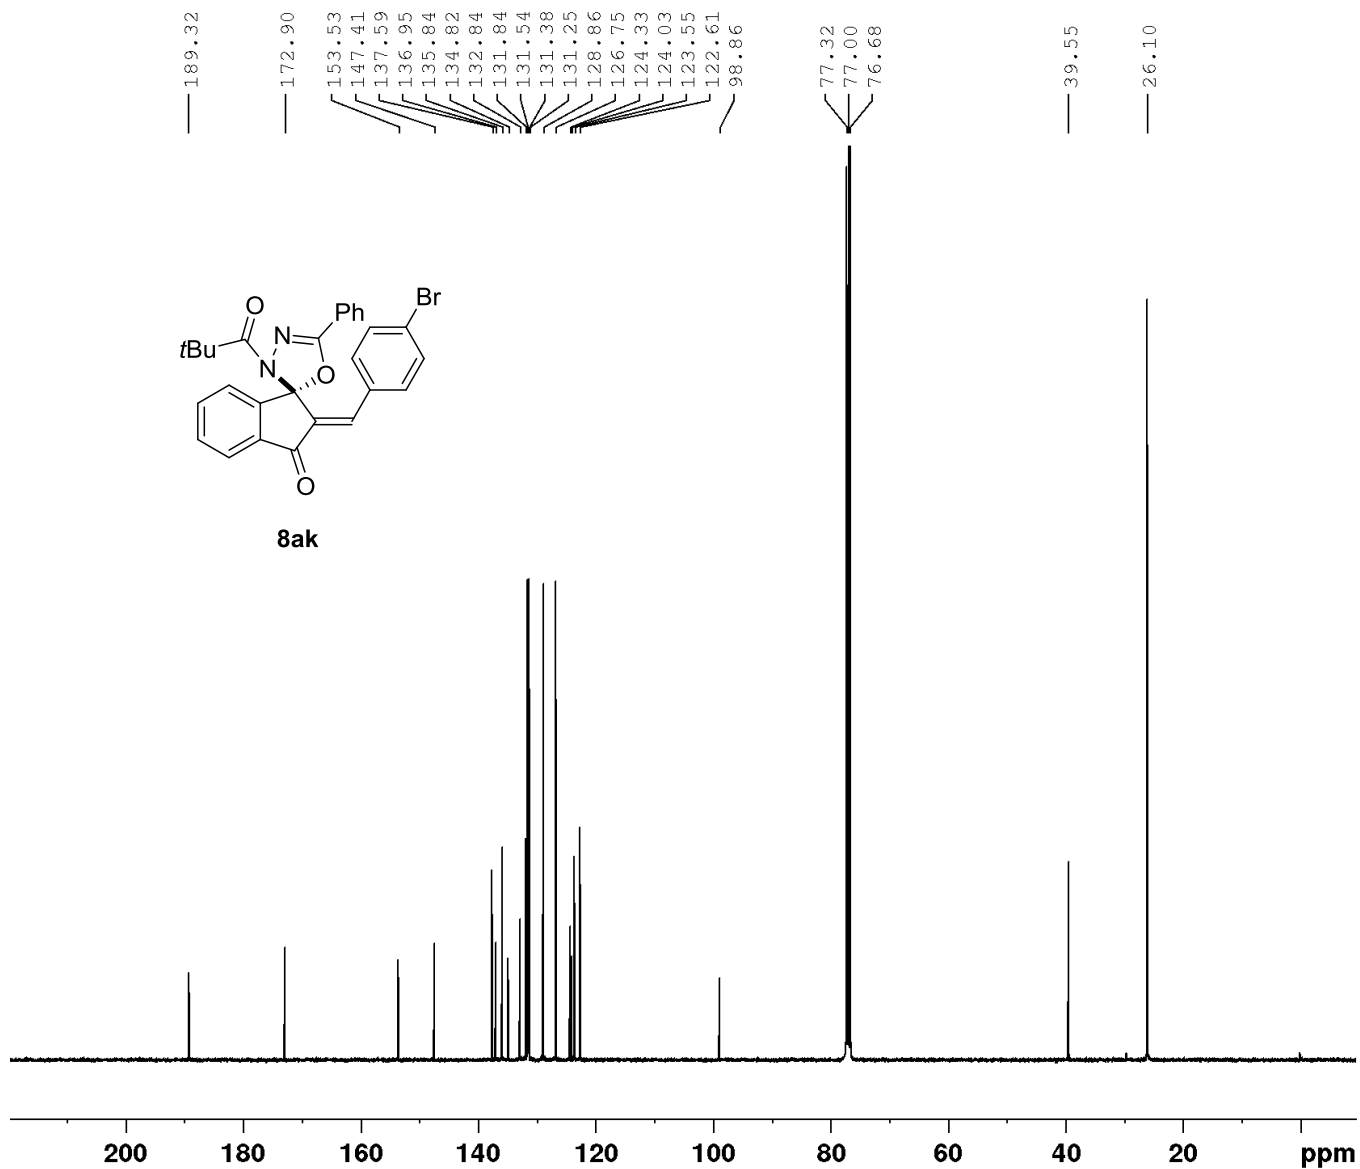

Current Data Parameters  
 NAME SW 836  
 EXPNO 6  
 PROCNO 1

F2 - Acquisition Parameters  
 Date\_ 20200524  
 Time 20.03  
 INSTRUM spect  
 PROBHD 5 mm BBO BB-1H  
 PULPROG zgpg30  
 TD 32768  
 SOLVENT CDCl3  
 NS 10000  
 DS 0  
 SWH 24038.461 Hz  
 FIDRES 0.733596 Hz  
 AQ 0.6815744 sec  
 RG 5792.6  
 DW 20.800 usec  
 DE 6.50 usec  
 TE 296.6 K  
 D1 2.00000000 sec  
 D11 0.03000000 sec  
 TD0 1

===== CHANNEL f1 =====  
 NUC1 13C  
 P1 10.00 usec  
 PL1 3.80 dB  
 SFO1 100.6233325 MHz

===== CHANNEL f2 =====  
 CPDPRG[2] waltz16  
 NUC2 1H  
 PCPD2 90.00 usec  
 PL2 10.20 dB  
 PL12 26.00 dB  
 PL13 29.00 dB  
 SFO2 400.1316005 MHz

F2 - Processing parameters  
 SI 32768  
 SF 100.6127730 MHz  
 WDW EM  
 SSB 0  
 LB 1.00 Hz  
 GB 0  
 PC 1.00

## IX. Scanned copies of EI Mass Spectra for selected compounds 6/7

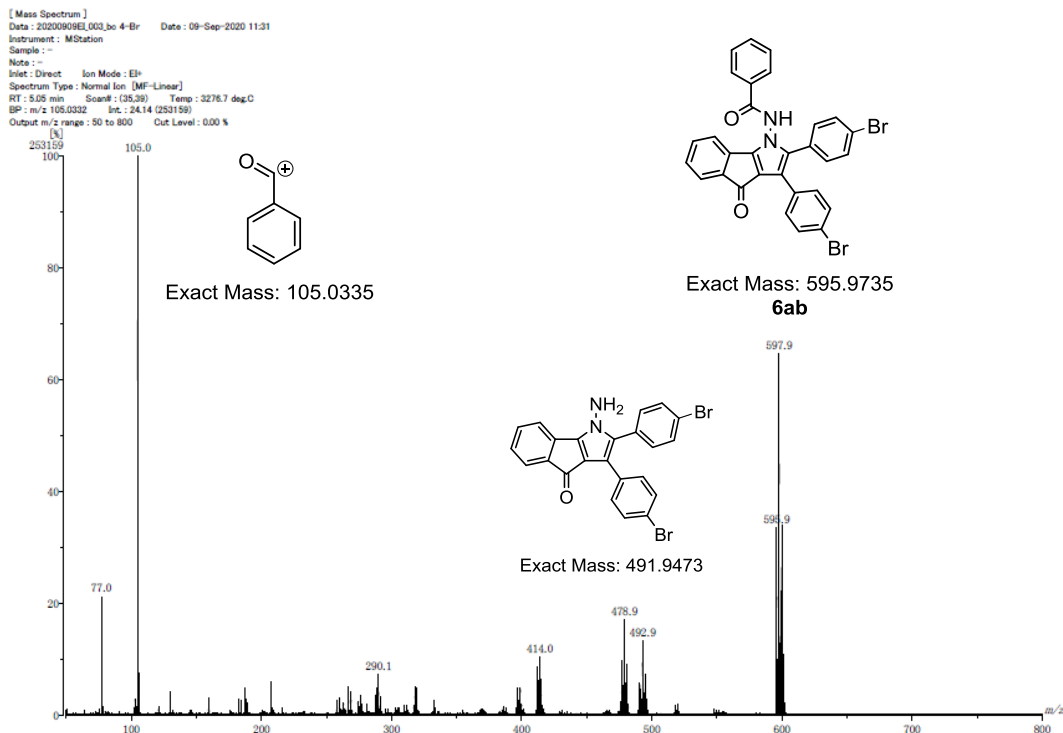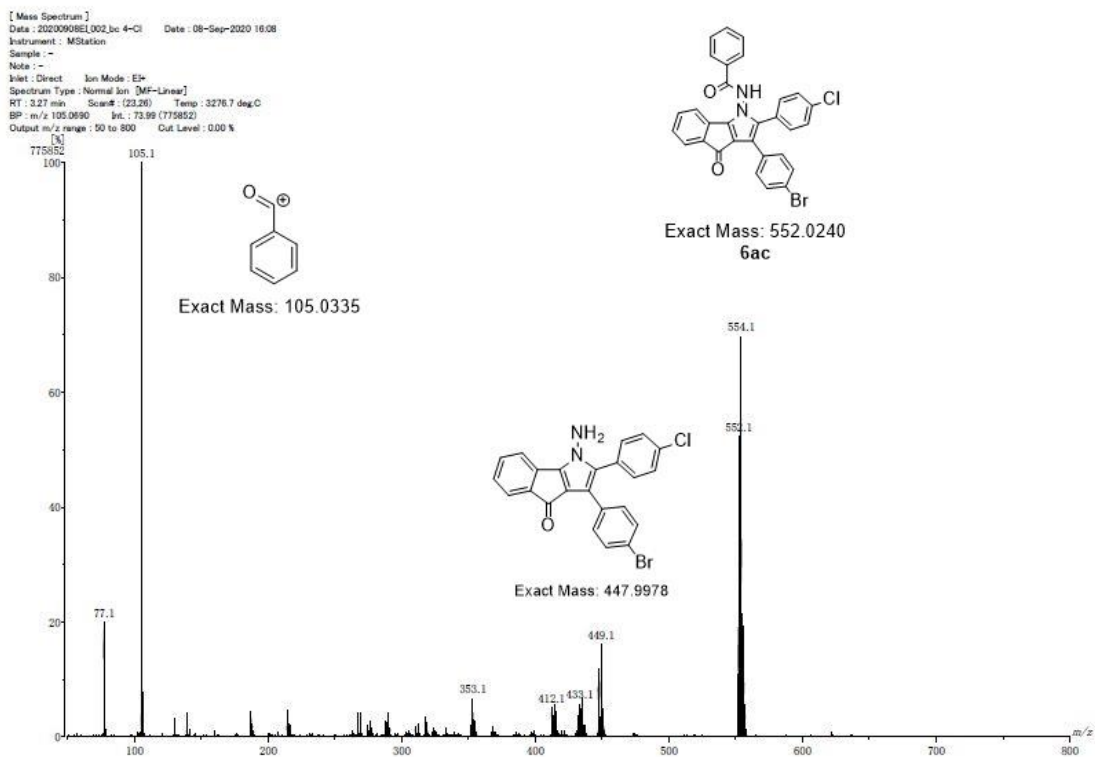

[ Mass Spectrum ]  
 Data : 20200923E1\_004\_b0 4-F Date : 23-Sep-2020 15:35  
 Instrument : MStation  
 Sample : -  
 Note : -  
 Inlet : Direct Ion Mode : EI+  
 Spectrum Type : Normal Ion [MF-Linear]  
 RT : 4.46 min Scan# : (31,35) Temp : 3276.7 deg.C  
 BP : m/z 105.0312 Int. : 318.49 (3339579)  
 Output m/z range : 50 to 800 Cut Level : 0.00 %

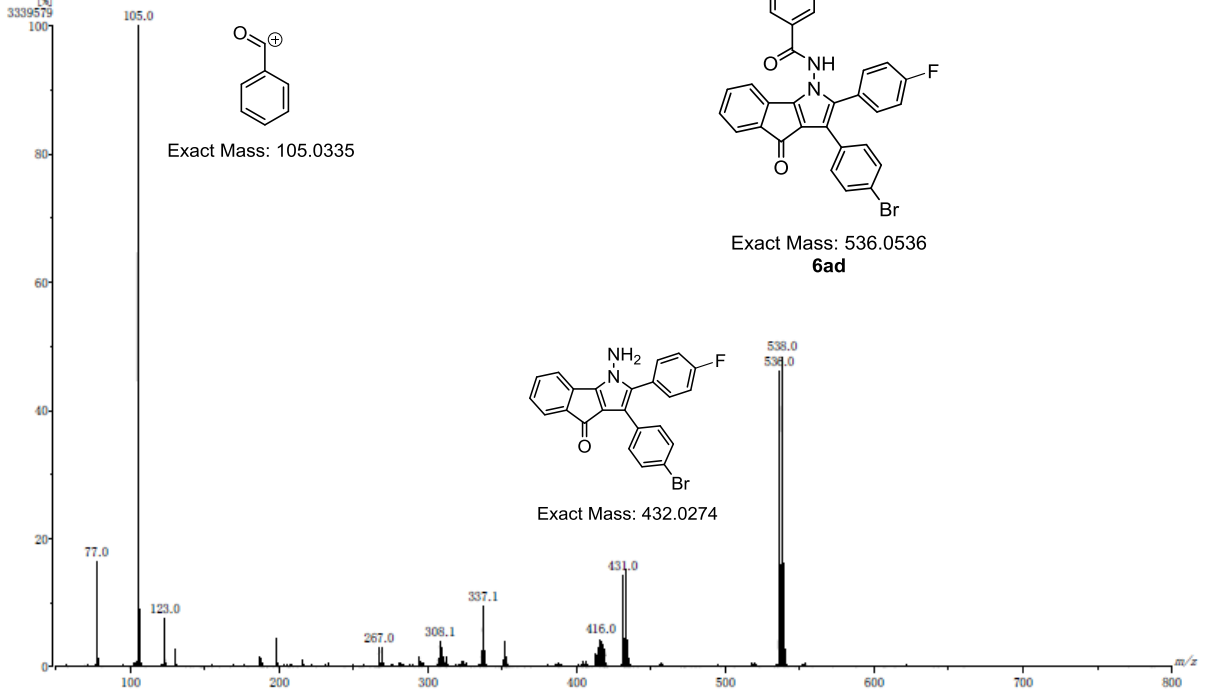

[ Mass Spectrum ]  
 Data : 20200908E1\_003\_b0 4-Me Date : 08-Sep-2020 18:27  
 Instrument : MStation  
 Sample : -  
 Note : -  
 Inlet : Direct Ion Mode : EI+  
 Spectrum Type : Normal Ion [MF-Linear]  
 RT : 3.12 min Scan# : (22,24) Temp : 3276.7 deg.C  
 BP : m/z 534.0476 Int. : 178.95 (1876445)  
 Output m/z range : 50 to 800 Cut Level : 0.00 %

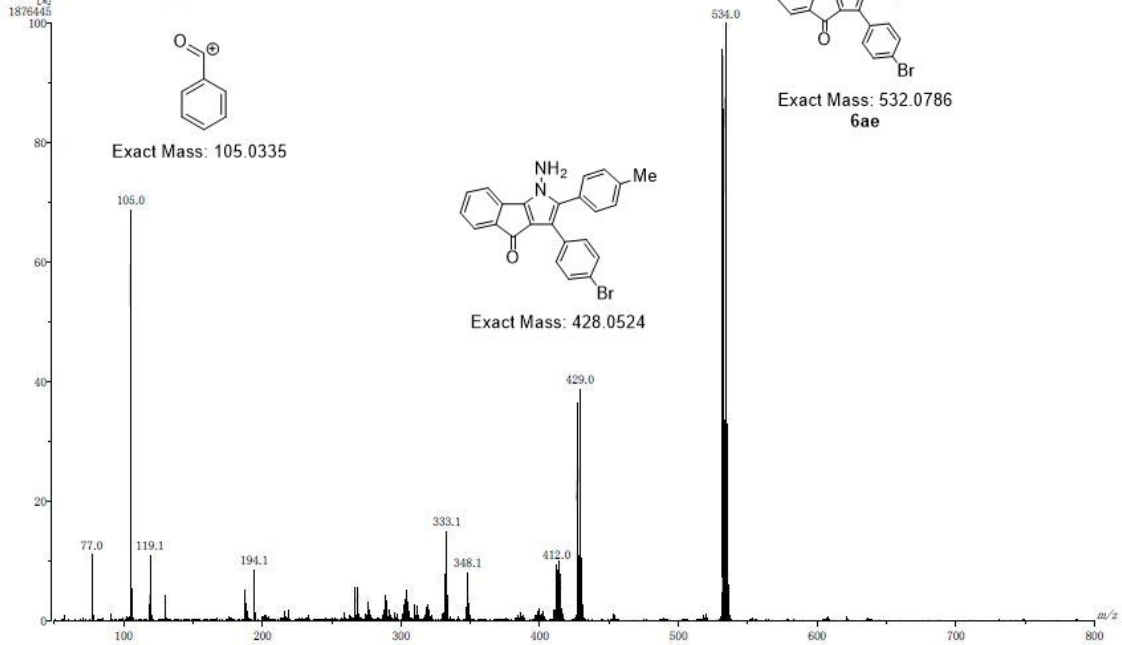

[ Mass Spectrum ]  
 Date : 20200922E[009]\_bc 3-Cl Date : 22-Sep-2020 19:37  
 Instrument : MSStation  
 Sample : -  
 Note : -  
 Inlet : Direct Ion Mode : E+  
 Spectrum Type : Normal Ion [MF-Linear]  
 RT : 1.79 min Scan# : (13,14) Temp : 3276.7 deg.C  
 BP : m/z 554.0237 Int. : 129.35 (1356302)  
 Output m/z range : 50 to 800 Cut Level : 0.00 %

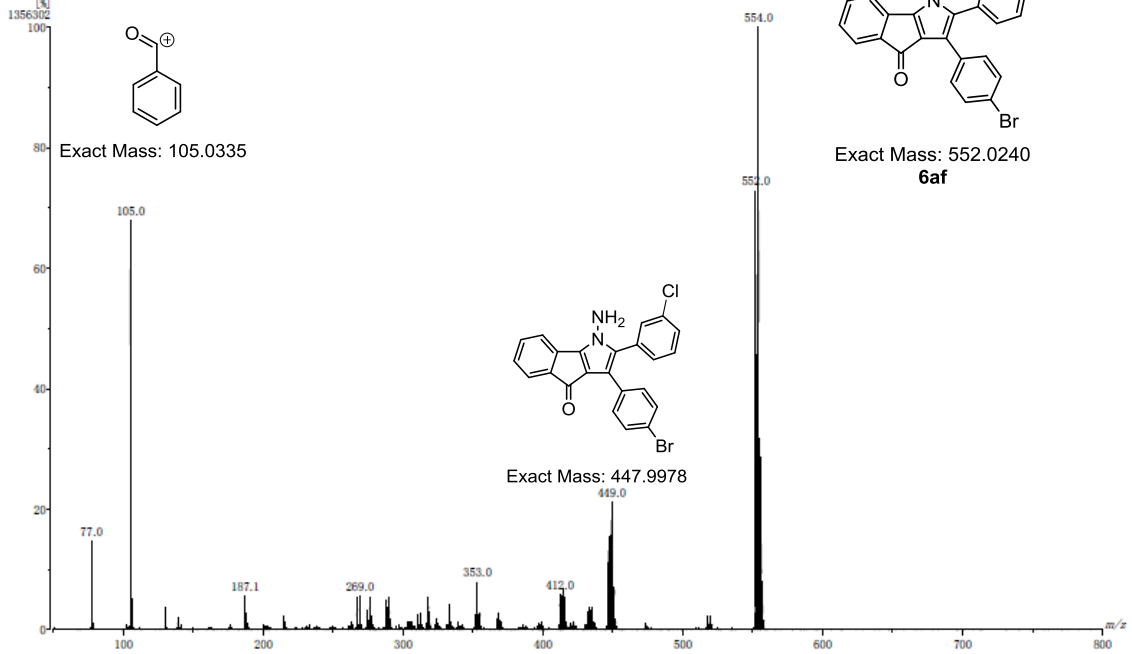

[ Mass Spectrum ]  
 Date : 20200923E[003]\_bc 3-Me Date : 23-Sep-2020 15:19  
 Instrument : MSStation  
 Sample : -  
 Note : -  
 Inlet : Direct Ion Mode : E+  
 Spectrum Type : Normal Ion [MF-Linear]  
 RT : 1.84 min Scan# : 12 Temp : 3276.7 deg.C  
 BP : m/z 534.0629 Int. : 66.10 (693071)  
 Output m/z range : 50 to 800 Cut Level : 0.00 %

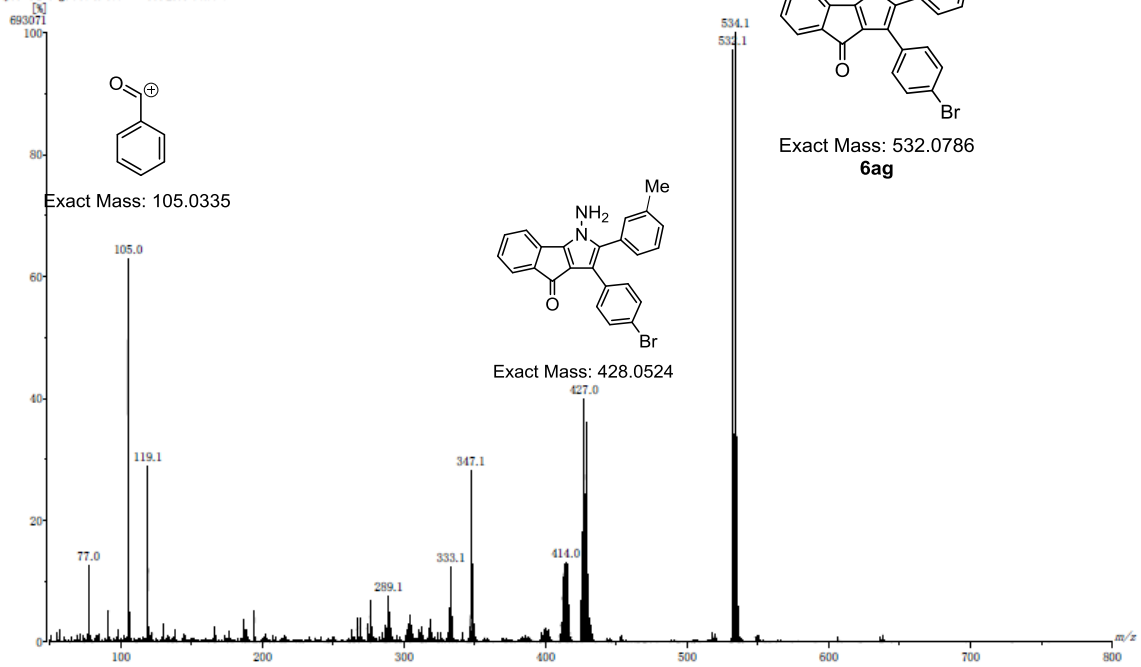



[ Mass Spectrum ]  
 Date : 20200909EI\_004.bc 3-OMe Date : 09-Sep-2020 15:11  
 Instrument : MStation  
 Sample : --  
 Note : --  
 Inlet : Direct Ion Mode : EI+  
 Spectrum Type : Normal Ion [MF-Linear]  
 RT : 2.23 min Scan# : (16,19) Temp : 3276.7 deg.C  
 BP : m/z 105.0732 Int : 189.40 (1891676)  
 Output m/z range : 50 to 800 Cut Level : 0.00 %

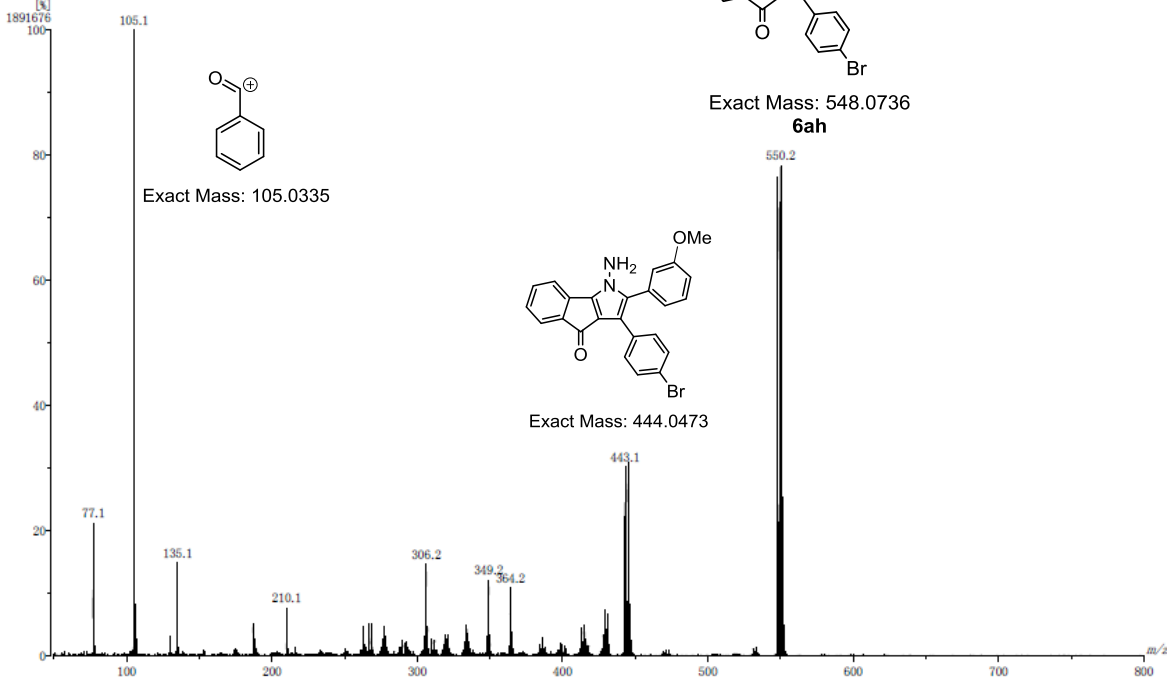

[ Mass Spectrum ]  
 Date : 20200909EI\_005.bc 2-Cl Date : 09-Sep-2020 15:25  
 Instrument : MStation  
 Sample : --  
 Note : --  
 Inlet : Direct Ion Mode : EI+  
 Spectrum Type : Normal Ion [MF-Linear]  
 RT : 3.57 min Scan# : (25,27) Temp : 3276.7 deg.C  
 BP : m/z 105.0346 Int : 64.36 (674893)  
 Output m/z range : 50 to 800 Cut Level : 0.00 %

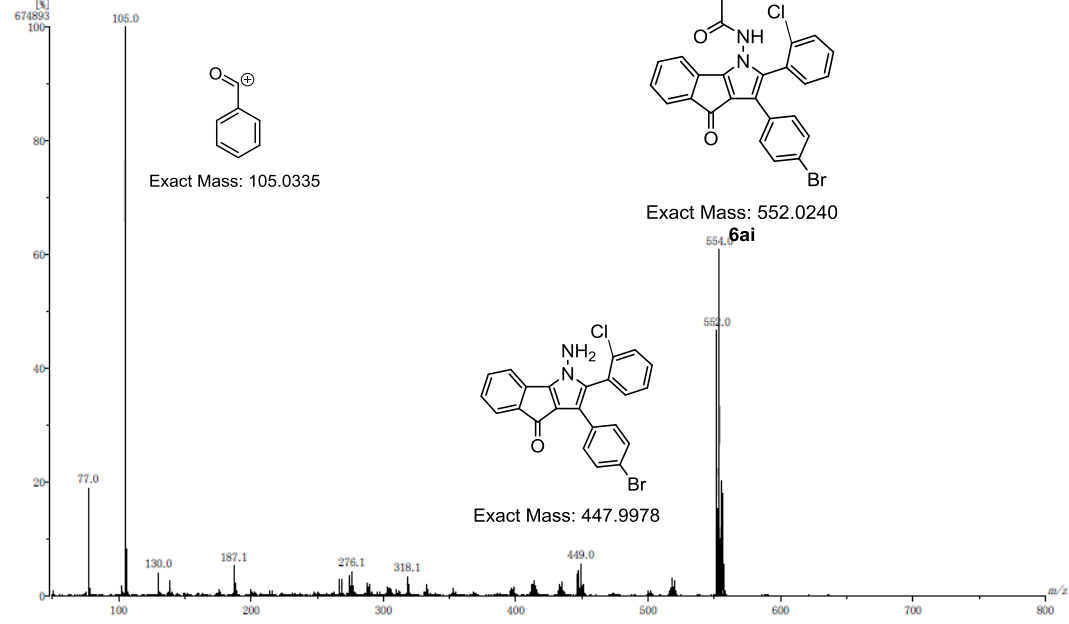

[ Mass Spectrum ]  
 Data : 20200909EI\_006\_bo furan Date : 09-Sep-2020 15:49  
 Instrument : MStation  
 Sample : -  
 Note : -  
 Inlet : Direct Ion Mode : EI+  
 Spectrum Type : Normal Ion [MF-Linear]  
 RT : 2.97 min Scan# : (21,24) Temp : 3276.7 deg.C  
 BP : m/z 510.0237 Int. : 255.06 (2674492)  
 Output m/z range : 50 to 800 Cut Level : 0.00 %

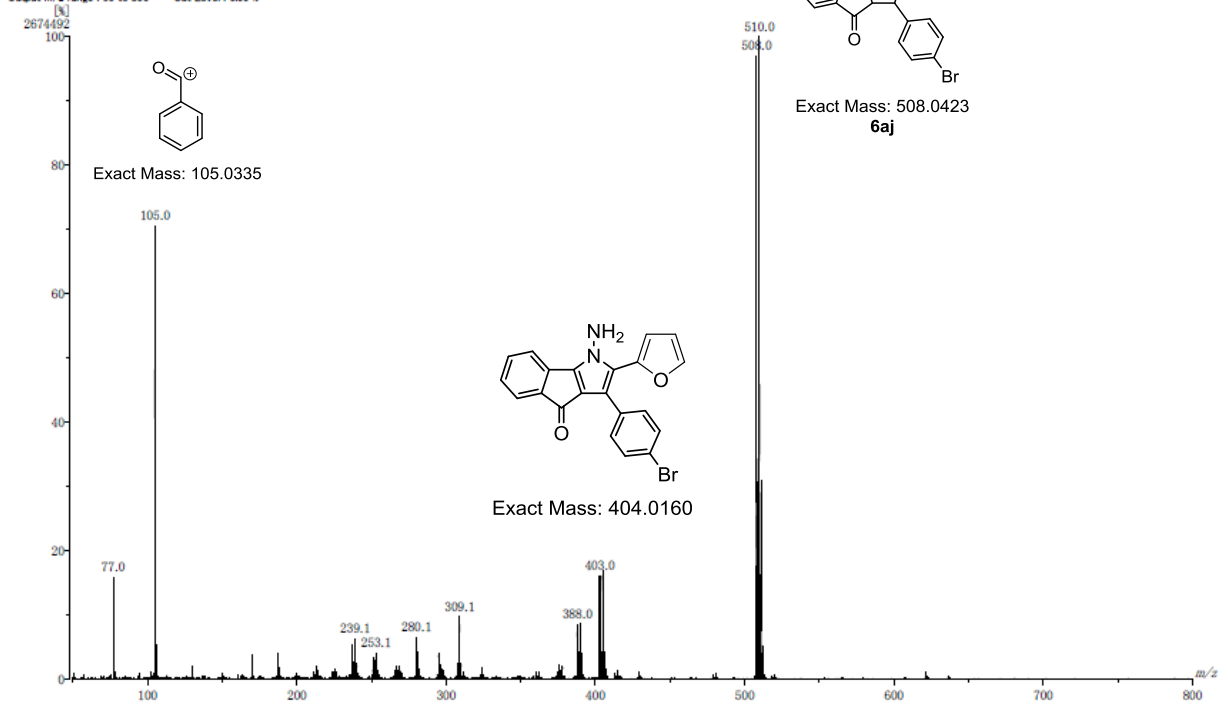

[ Mass Spectrum ]  
 Data : 20200909EI\_006\_hy 4-Cl Date : 09-Sep-2020 16:49  
 Instrument : MStation  
 Sample : -  
 Note : -  
 Inlet : Direct Ion Mode : EI+  
 Spectrum Type : Normal Ion [MF-Linear]  
 RT : 2.97 min Scan# : (21,23) Temp : 3276.7 deg.C  
 BP : m/z 138.9961 Int. : 35.40 (371229)  
 Output m/z range : 50 to 800 Cut Level : 0.00 %

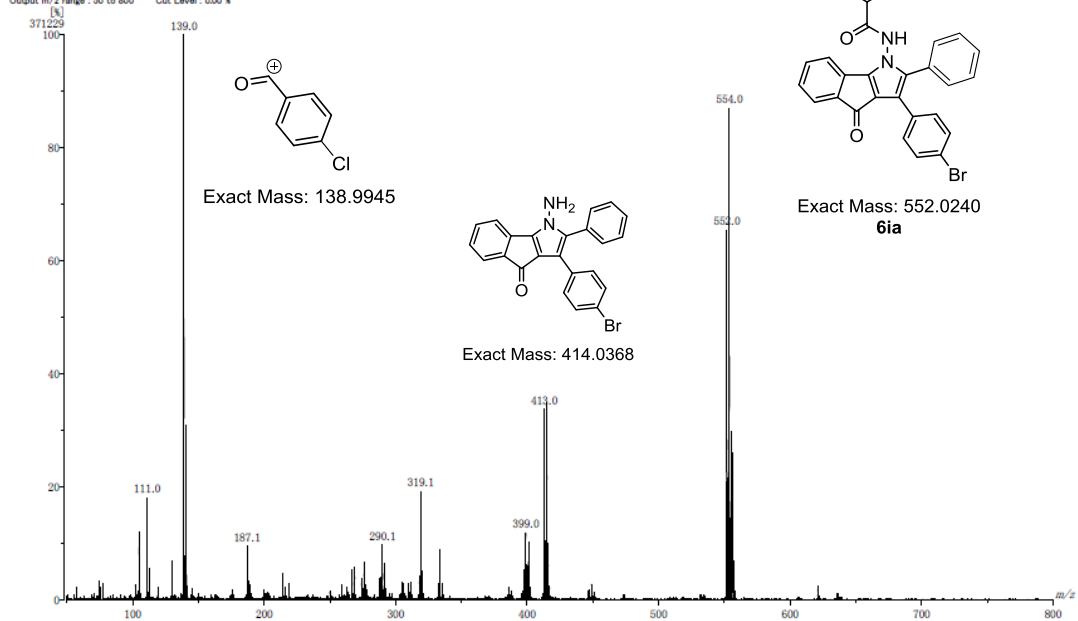

[Mass Spectrum]  
 Date : 20200904EL007\_hy CH3 Date : 09-Sep-2020 16:29  
 Instrument : MStation  
 Sample : -  
 Note : -  
 Inlet : Direct Ion Mode : EI+  
 Spectrum Type : Normal Ion [MF-Linear]  
 RT : 2.53 min Scan#: (10,20) Temp : 3276.7 deg.C  
 BP : m/z 119.0834 Int : 96.53 (1012205)  
 Output m/z range : 50 to 800 Cut Level : 0.00 %

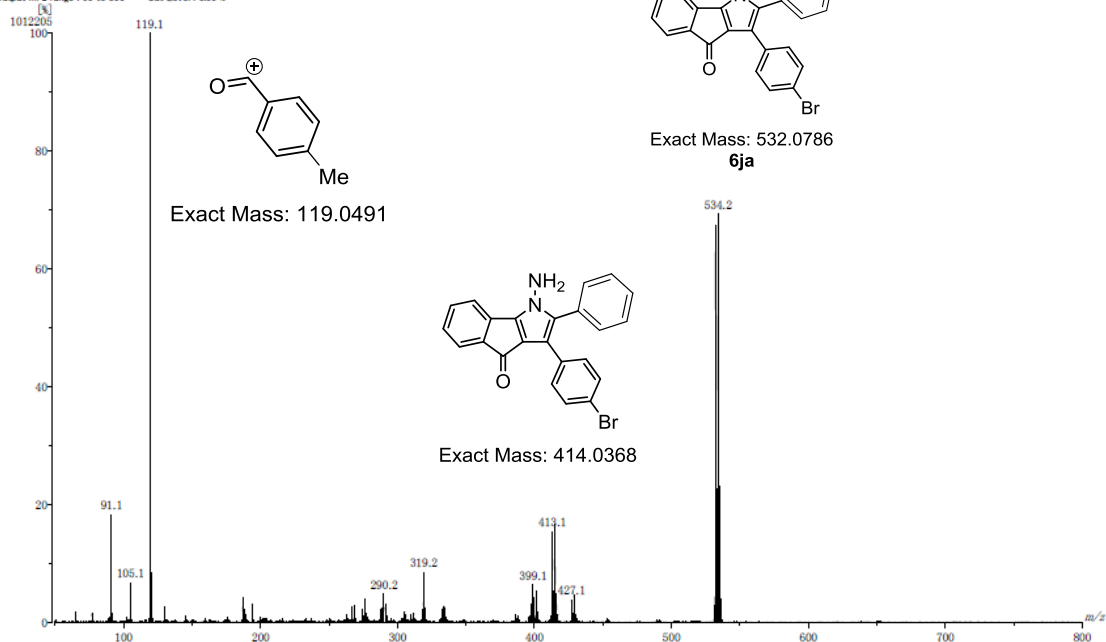

[Mass Spectrum]  
 Date : 20200922E1\_006\_SW-676 Date : 22-Sep-2020 18:57  
 Instrument : MStation  
 Sample : -  
 Note : -  
 Inlet : Direct Ion Mode : EI+  
 Spectrum Type : Normal Ion [MF-Linear]  
 RT : 3.42 min Scan#: (24,26) Temp : 3276.7 deg.C  
 BP : m/z 534.1047 Int : 205.94 (2159421)  
 Output m/z range : 50 to 800 Cut Level : 0.00 %

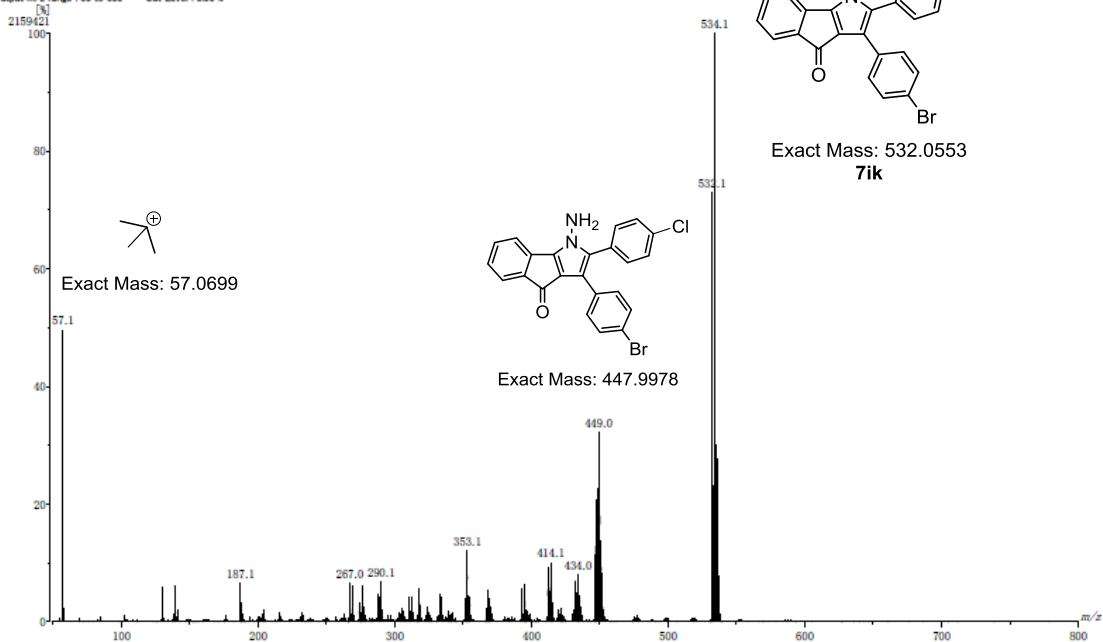

[ Mass Spectrum ]  
Data : 20200922E\007\_SW-875 Date : 22-Sep-2020 19:12  
Instrument : MStation  
Sample : -  
Note : -  
Inlet : Direct Ion Mode : ESI-  
Spectrum Type : Normal Ion [MF-Linear]  
RT : 1.49 min Scan# : (1,13) Temp : 3276.7 deg.C  
BP : m/z 514.1926 Int. : 123.40 (1293901)  
Output m/z range : 50 to 800 Cut Level : 0.00 %

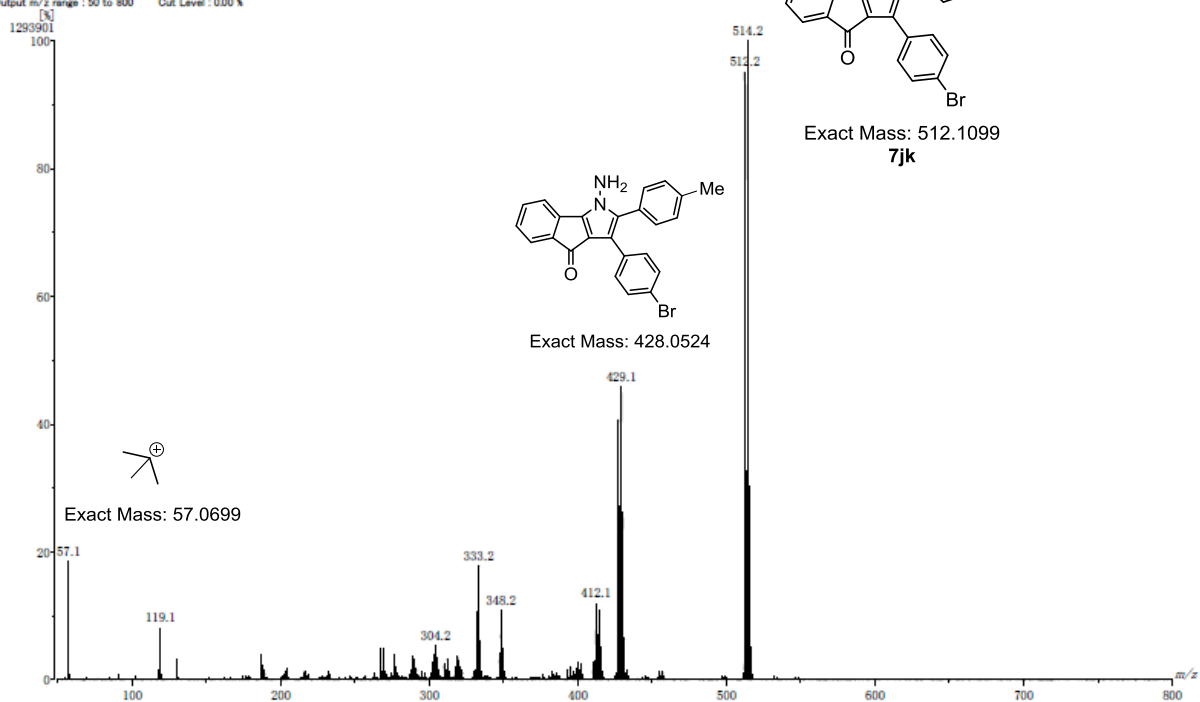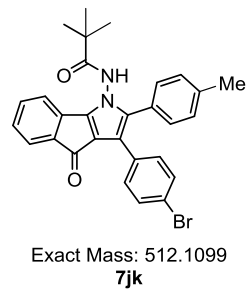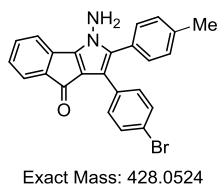

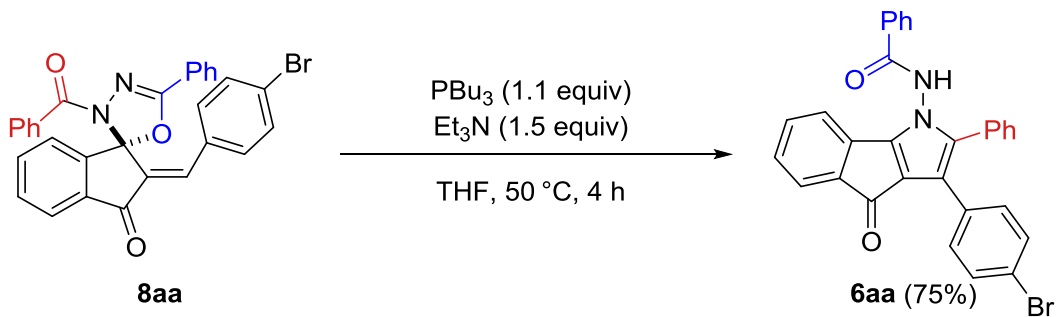

We have examined the reaction between phenyl substituted **8aa**,  $\text{PBU}_3$  (1.1 equiv) and  $\text{Et}_3\text{N}$  (1.5 equiv) in the presence of THF at 50 °C. The desired indeno[1,2-*b*]pyrrole **6aa** was observed in 75% yield after 4 h, and further confirmed by using  $^1\text{H}$  NMR as well as EIMS analysis.

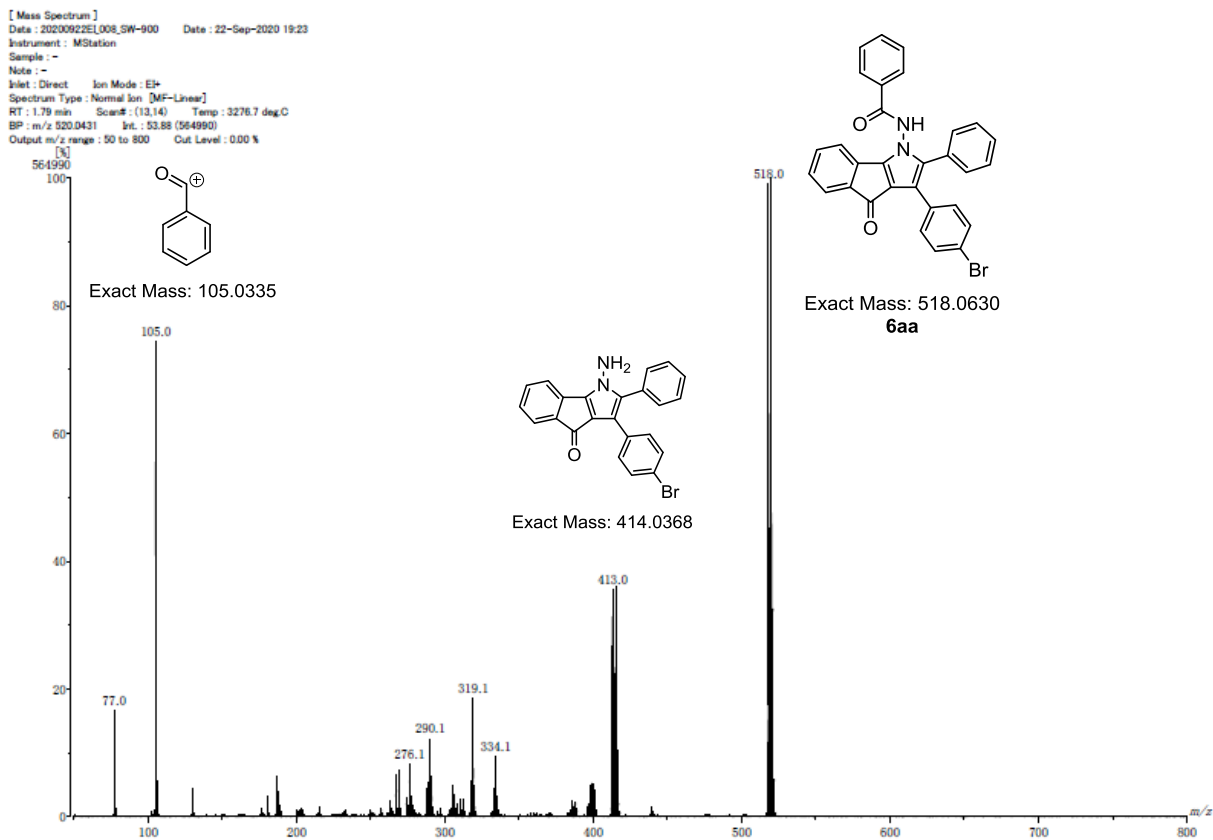

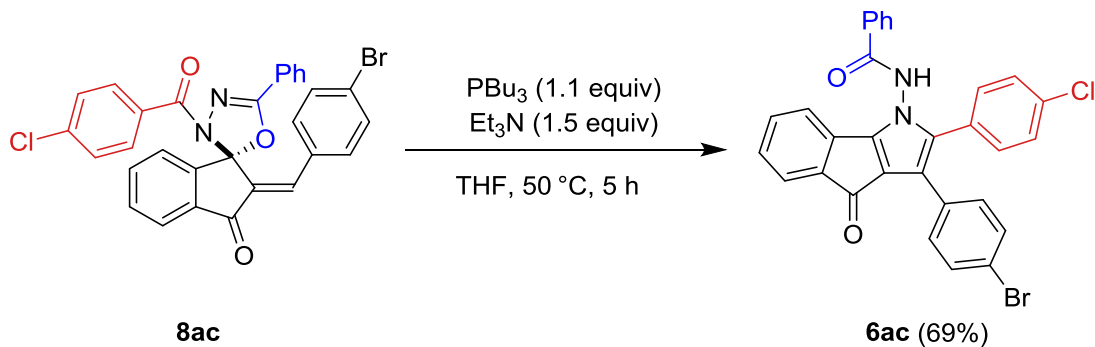

We have examined the reaction between *para*-chloro substituted **8ac**, PBU<sub>3</sub> (1.1 equiv) and Et<sub>3</sub>N (1.5 equiv) in the presence of THF at 50 °C. The desired indeno[1,2-*b*]pyrrole **6ac** was observed in 69% yield after 5 h, and further confirmed by using <sup>1</sup>H NMR as well as EIMS analysis.

[Mass Spectrum]  
 Data : 20200909EI\_009\_SW-954 Date : 09-Sep-2020 17:06  
 Instrument : MStation  
 Sample : --  
 Note : --  
 Inlet : Direct Ion Mode : EI+  
 Spectrum Type : Normal Ion [MF-Linear]  
 RT : 1.64 min Scan# : (12,15) Temp : 3276.7 degC  
 BP : m/z 554.0061 Int. : 195.64 (2051420)  
 Output m/z range : 50 to 800 Cut Level : 0.00 %

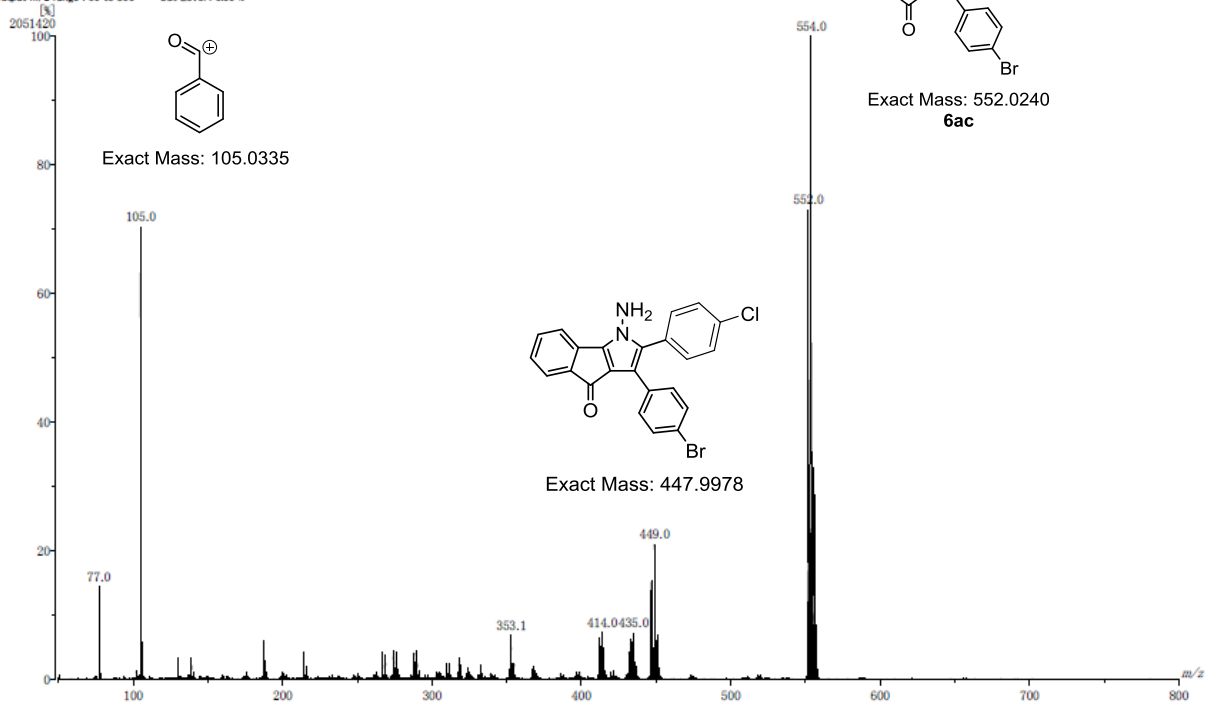



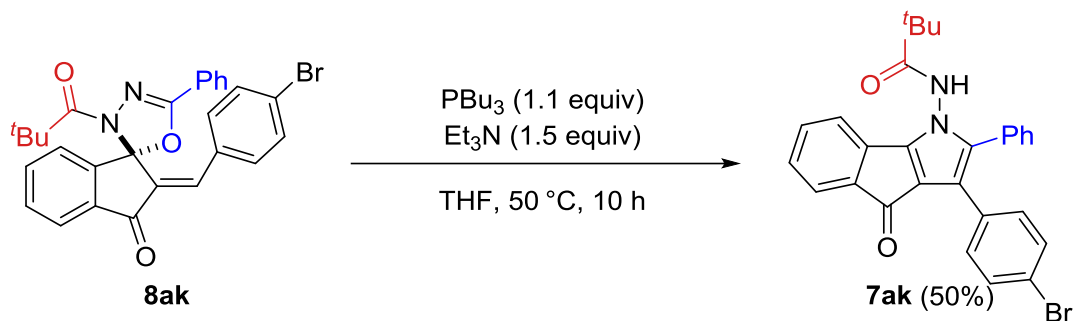

Similarly, we performed the reaction between pivaloyl substituted **8ak**,  $\text{PBu}_3$  (1.1 equiv) and  $\text{Et}_3\text{N}$  (1.5 equiv) in presence of THF at 50 °C. The desired indeno[1,2-*b*]pyrrole **7ak** was observed in 50% yield after longer reaction time (10 h), and further confirmed by using  $^1\text{H}$  NMR as well as EIMS analysis.

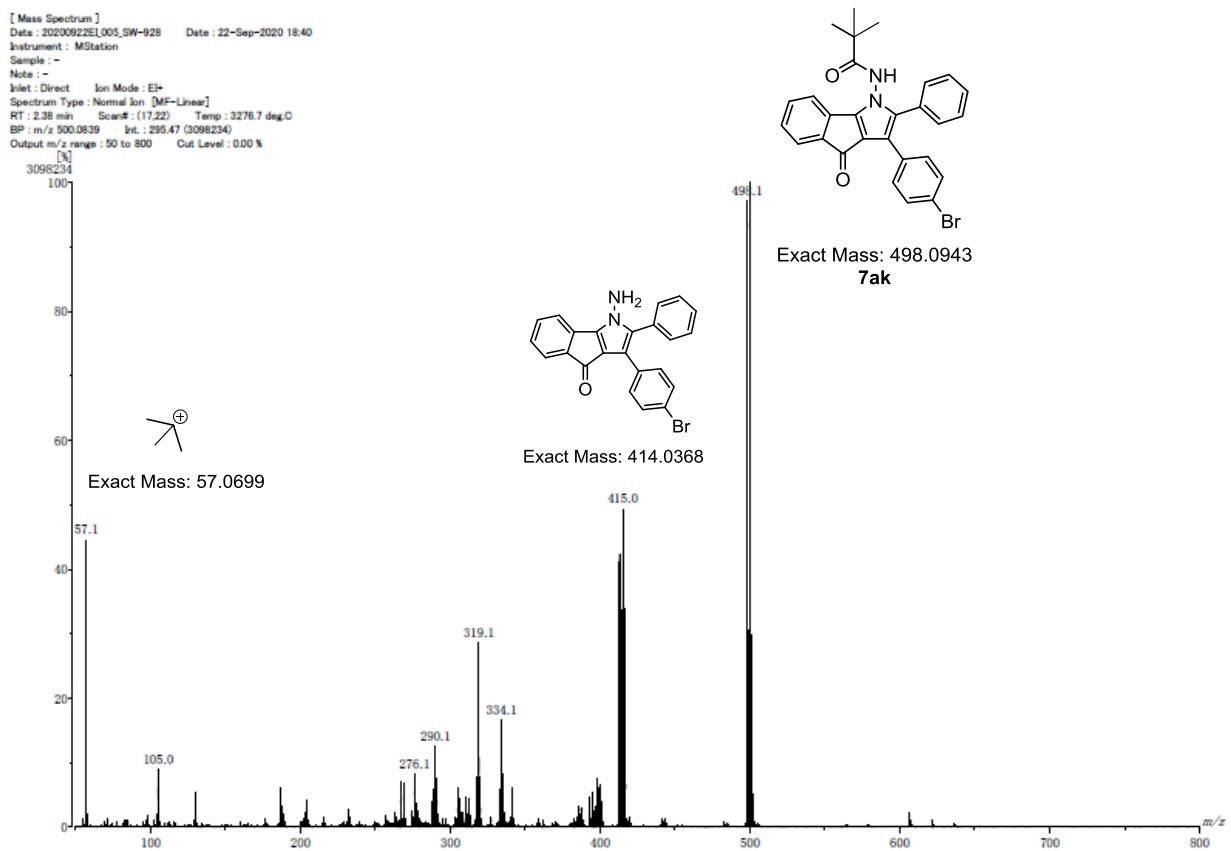

Supplement: d0cc08184a1.pdf [file d0cc08184a1.pdf]
